# Supplementary material
Source: HighWire-hosted journal article supplement (doi:10.1101/rna.079088.121)

Figure S3

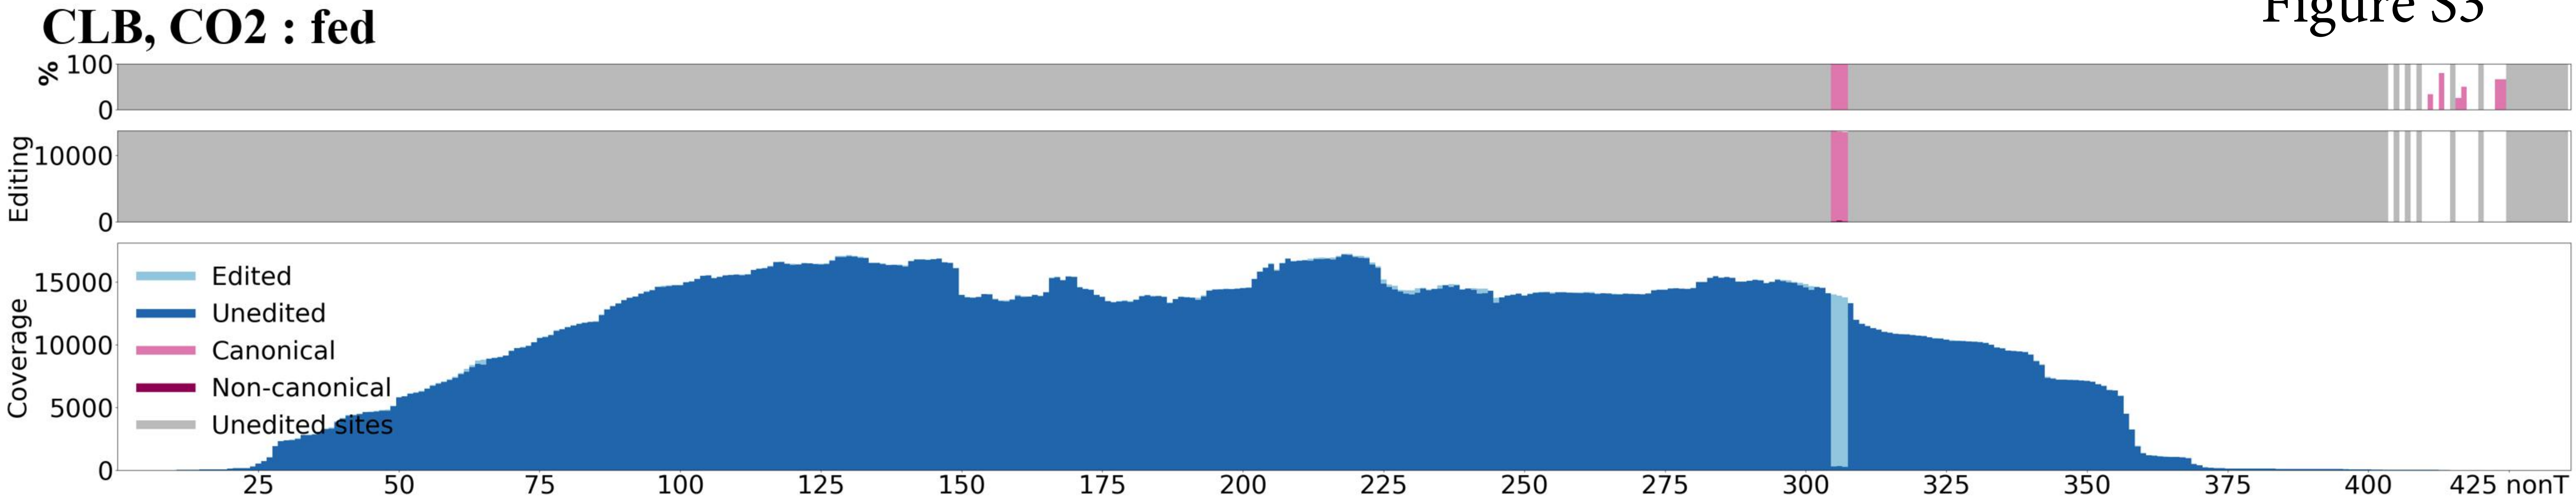

# CLB, CO2 : fed

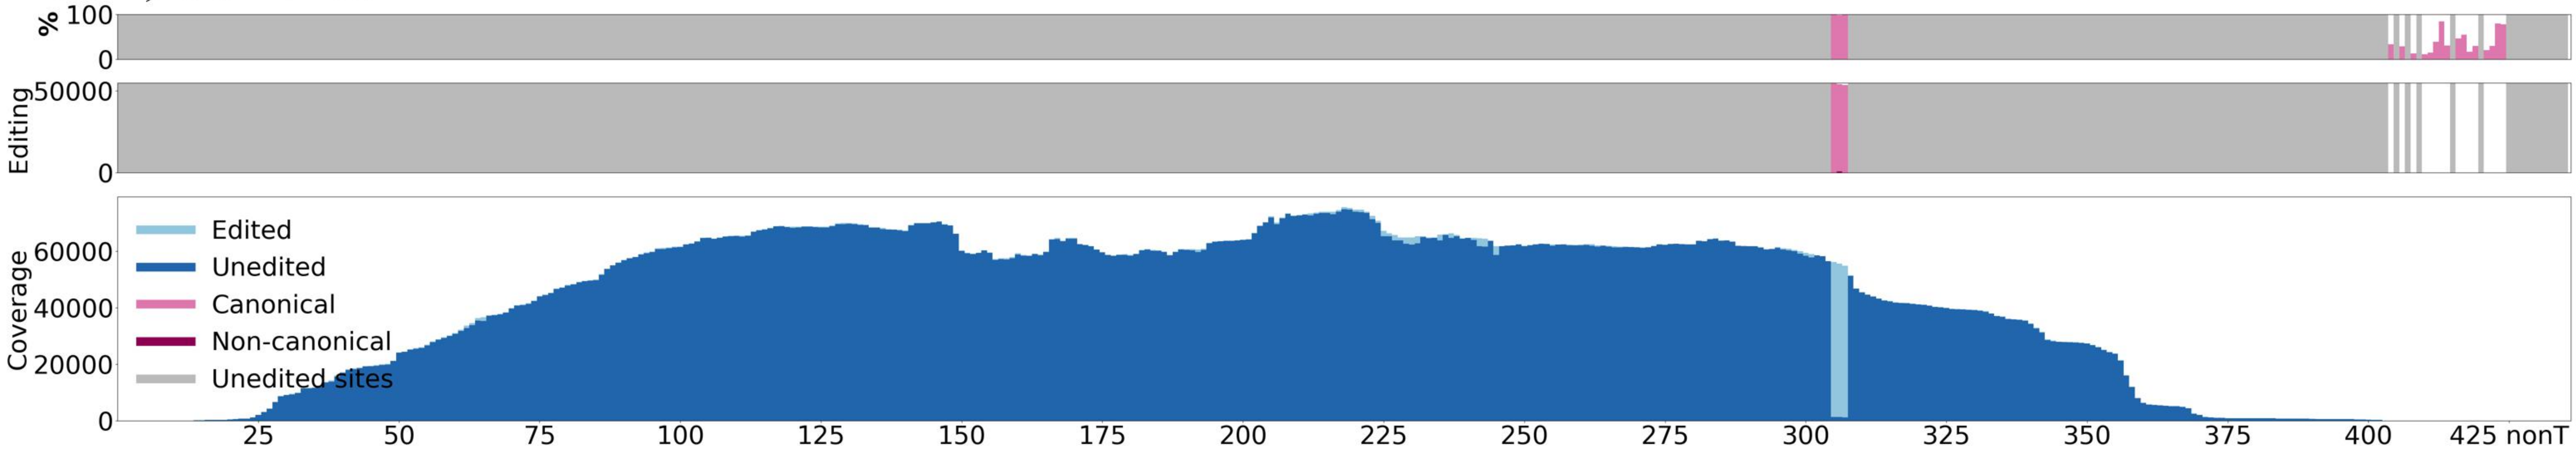

# CLB, CO2 : abrupt

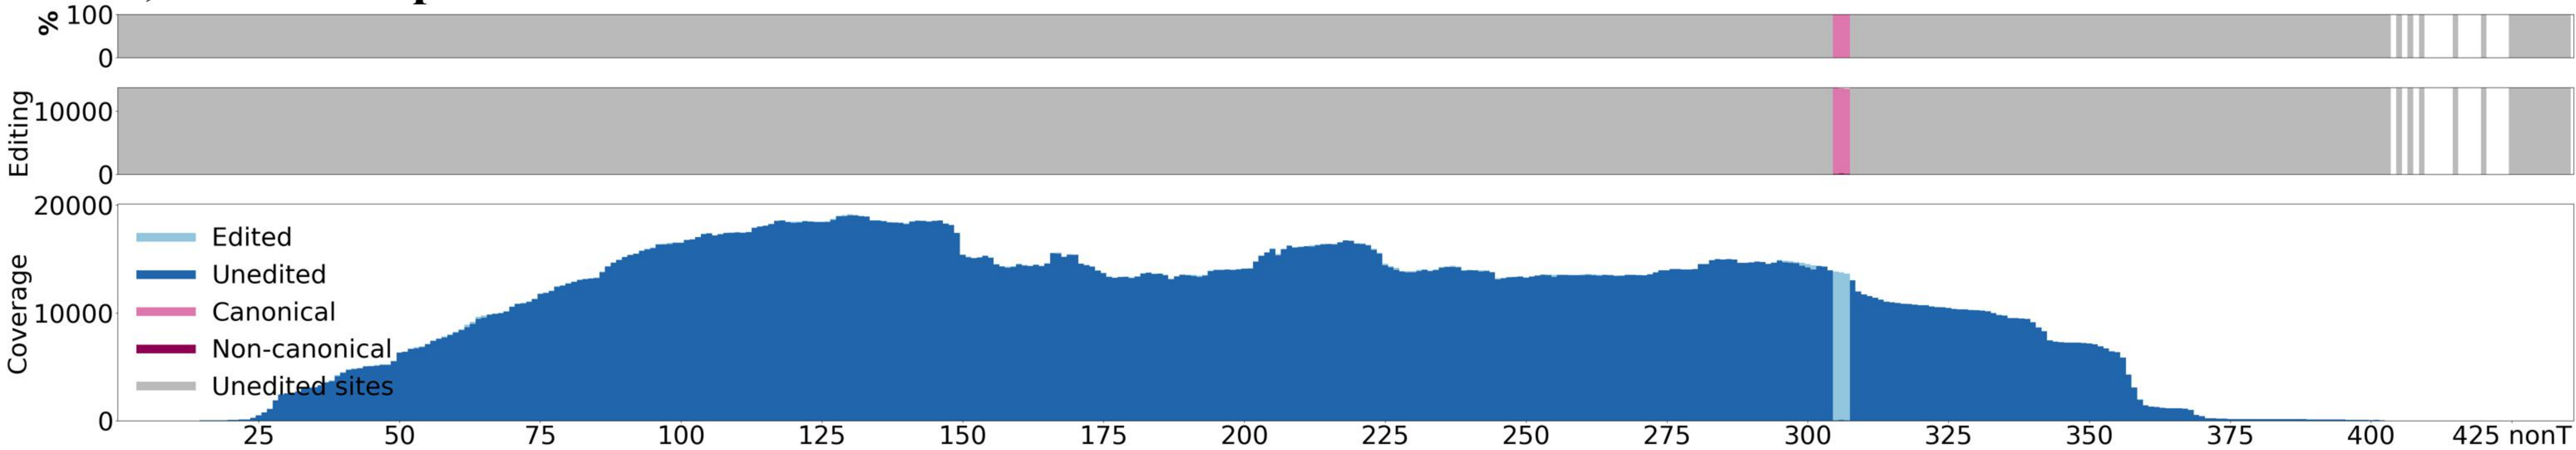

# CLB, CO2 : abrupt

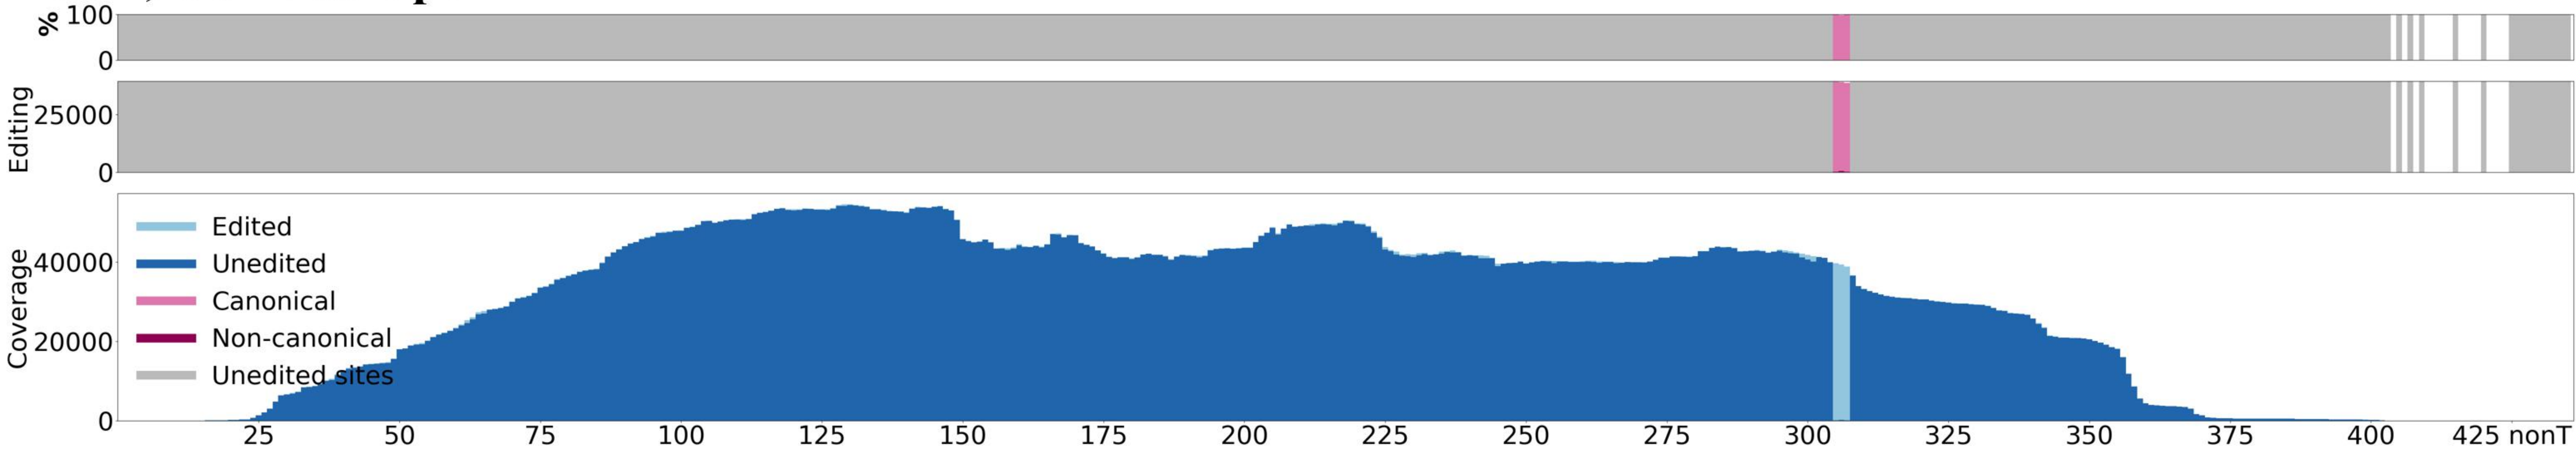

# CLB, CO2 : slow

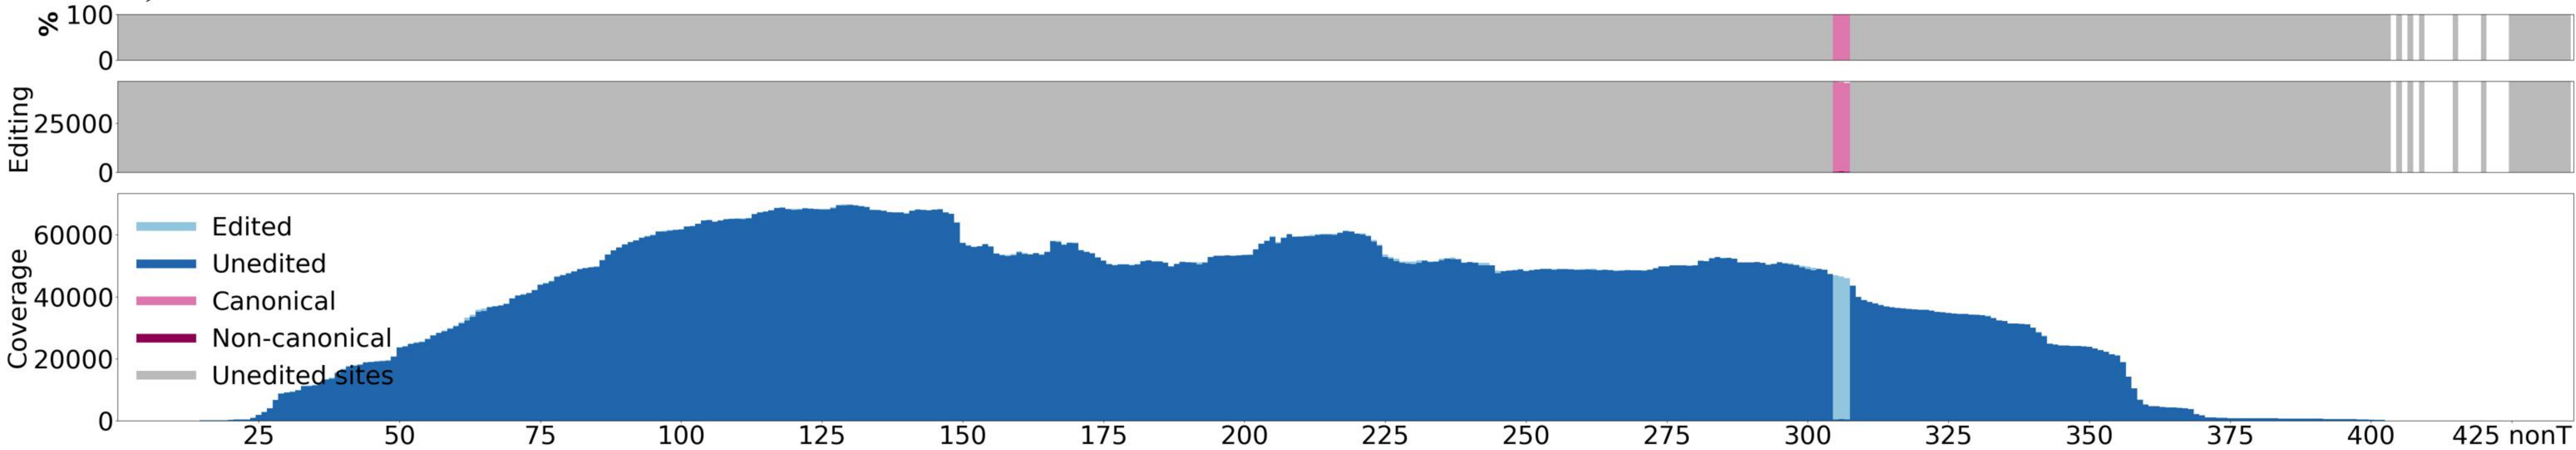

# CLB, CO2 : slow

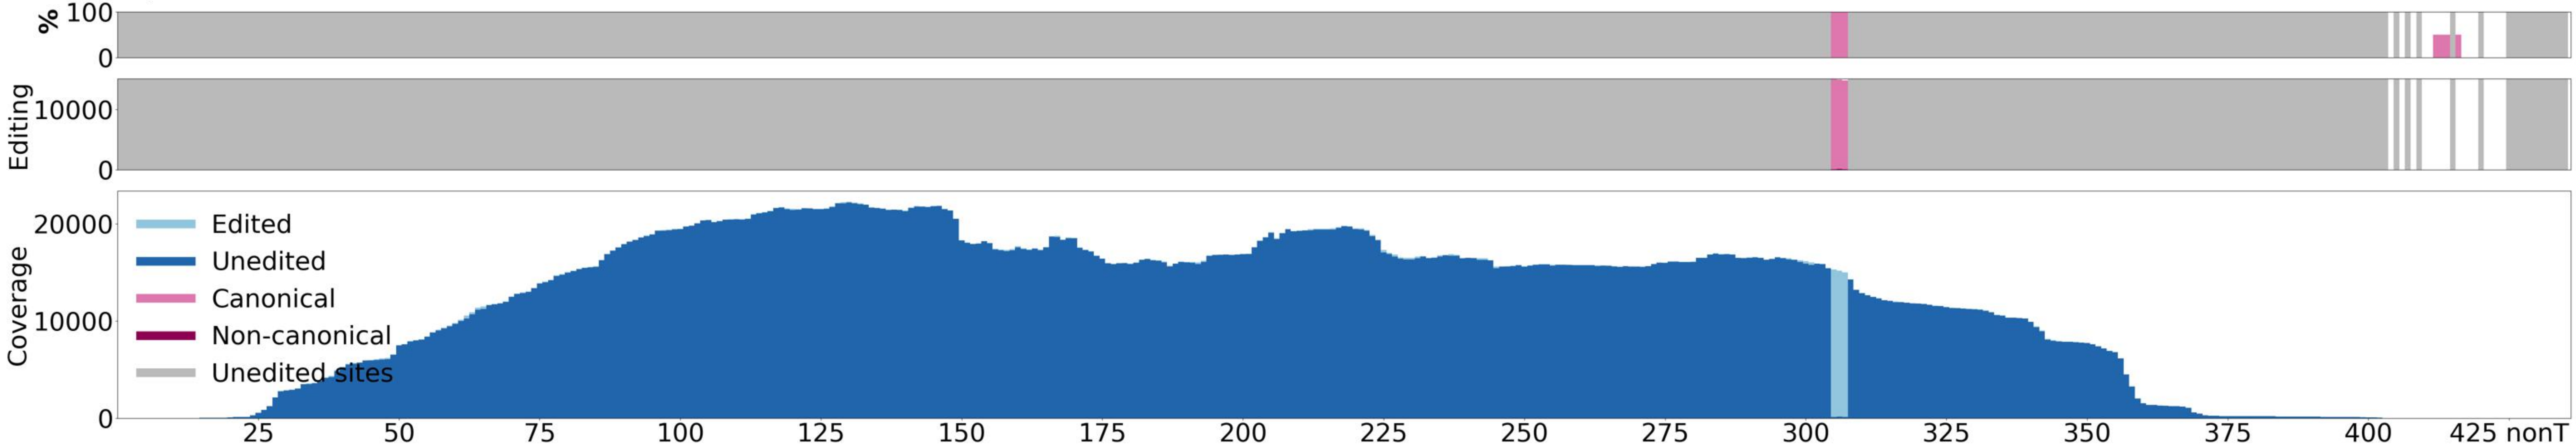

# CLB, CO2 : mito

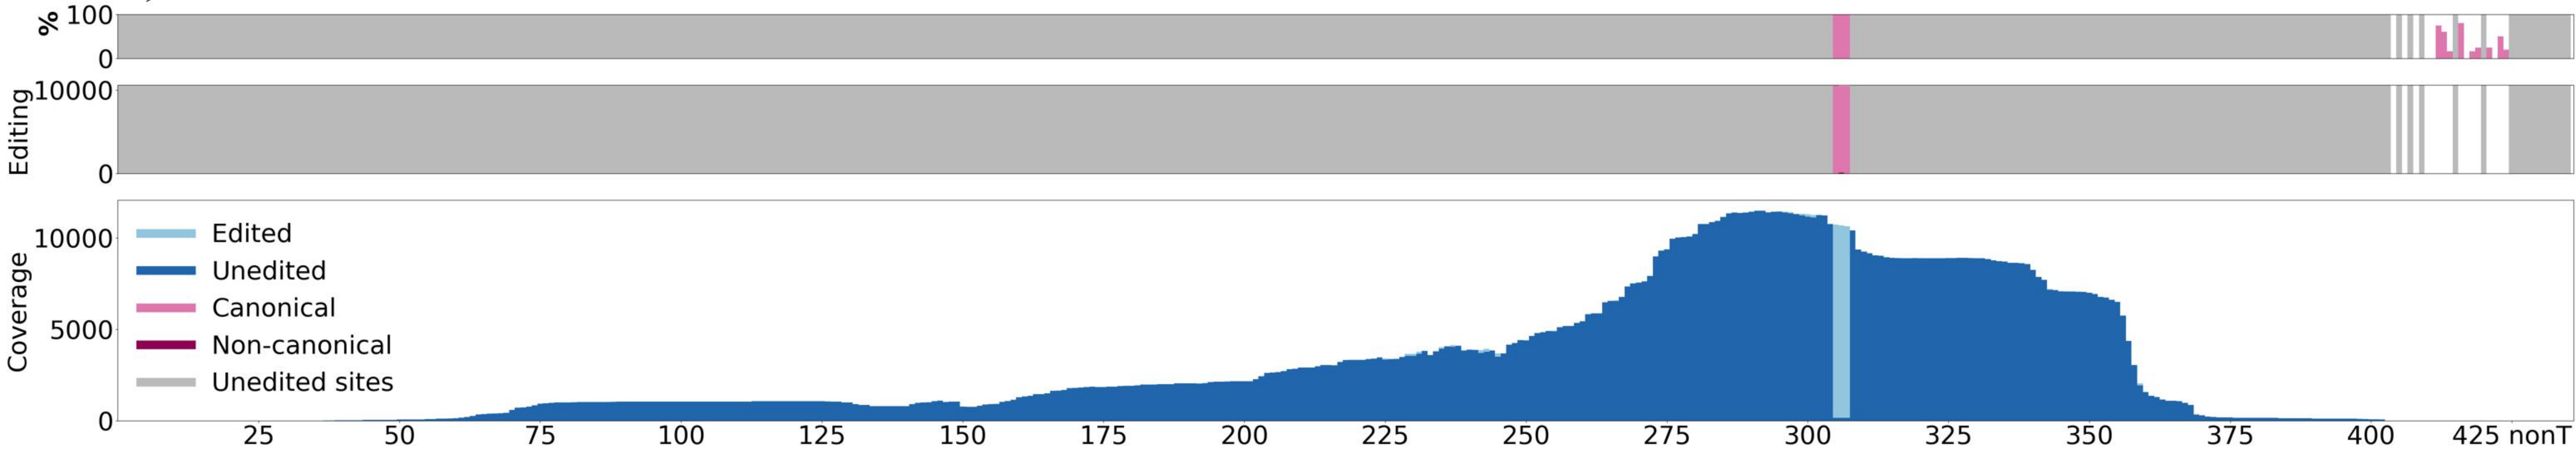

# CLB, CO2 : mito

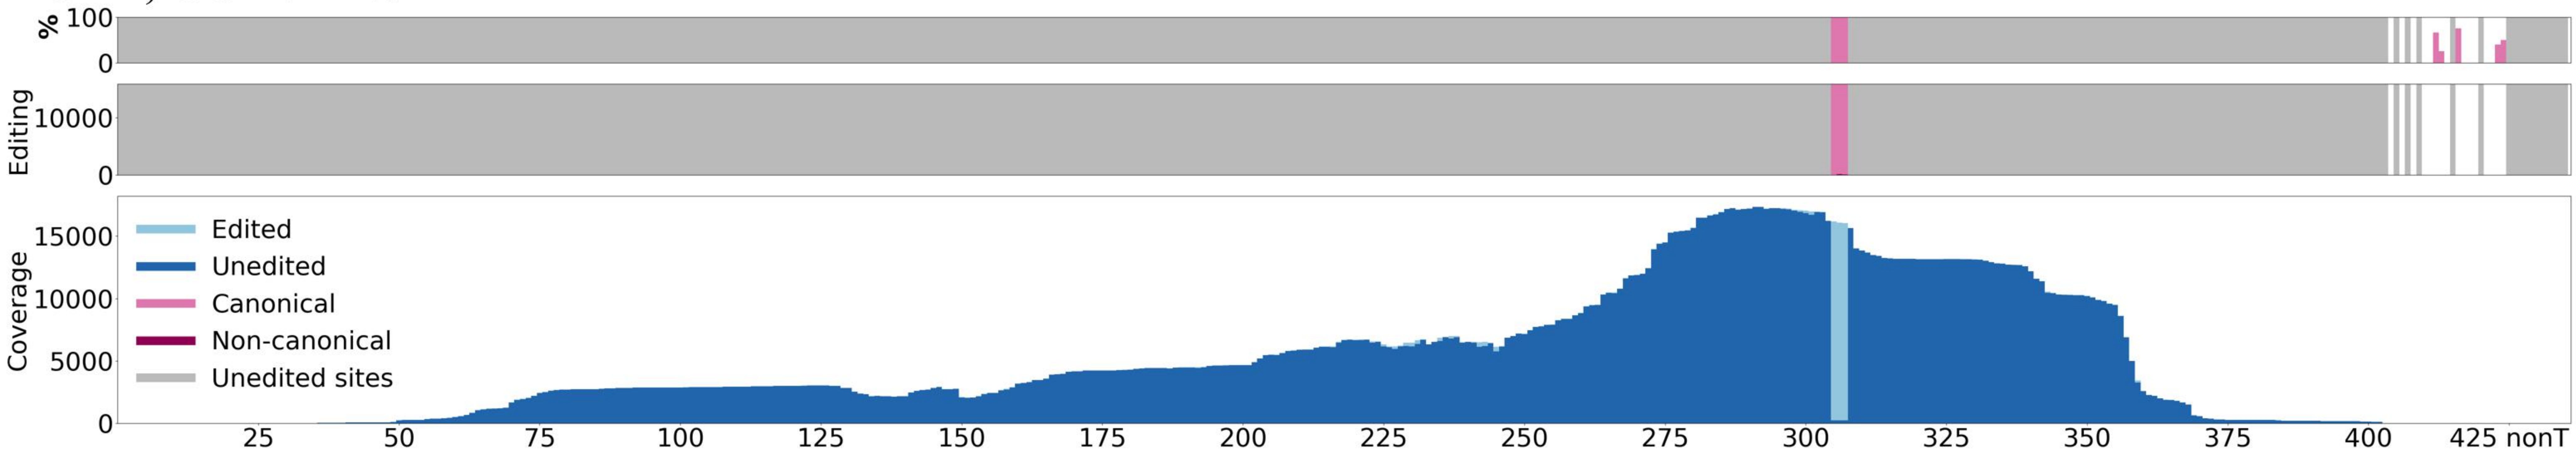

# CLB, CO2 : total

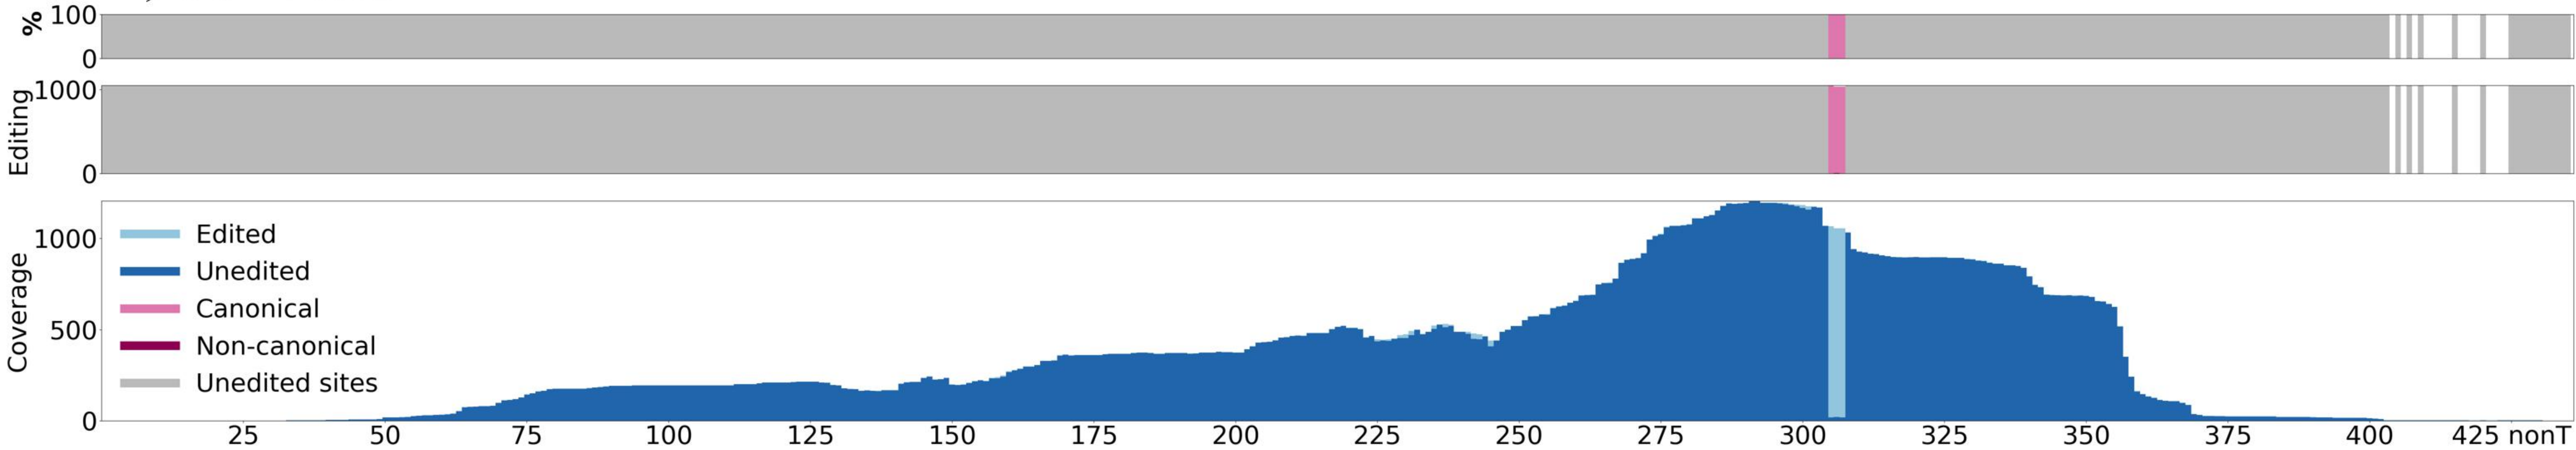

# CLB, CO2 : total

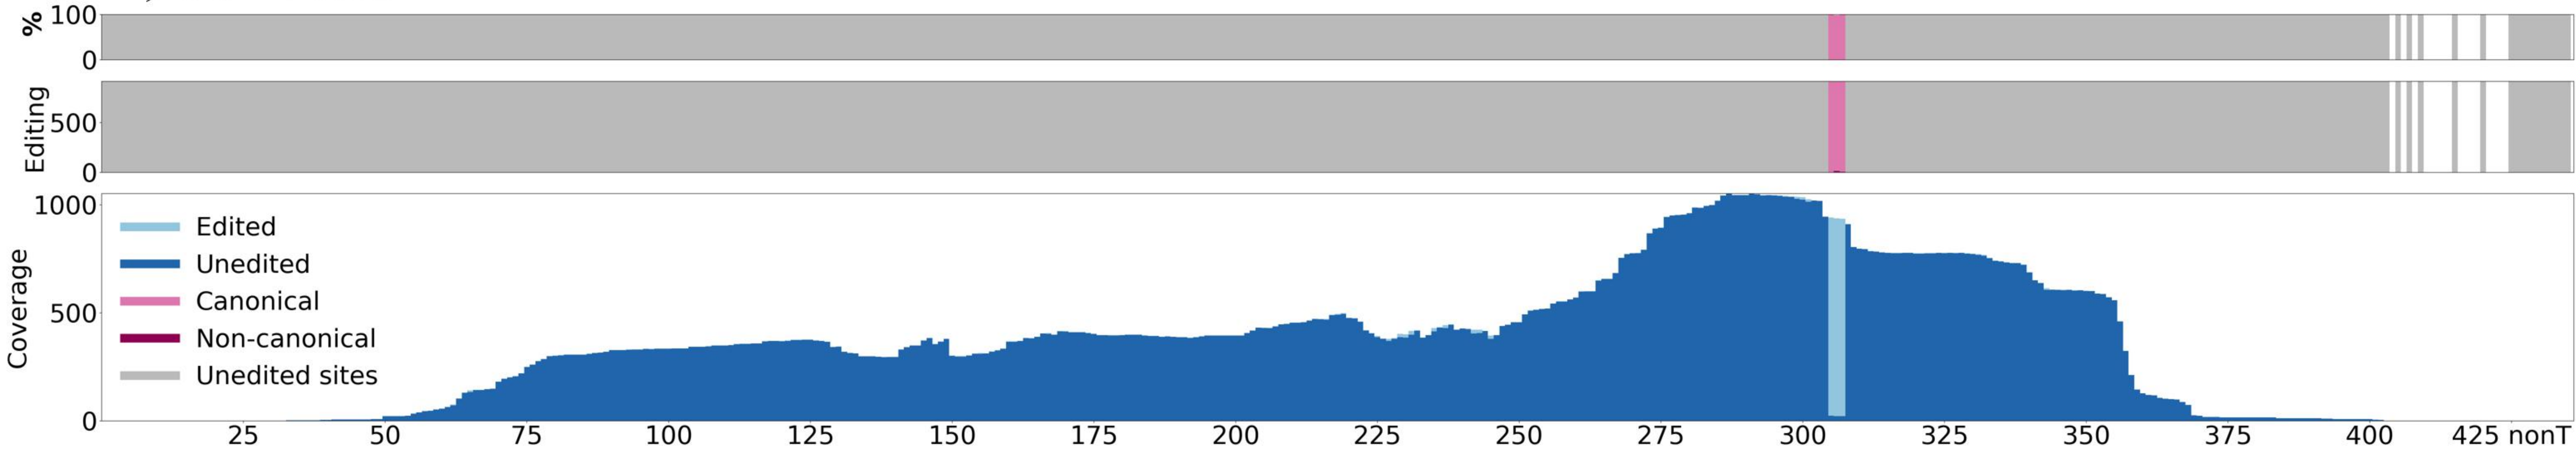

# CLB, CO3 : fed

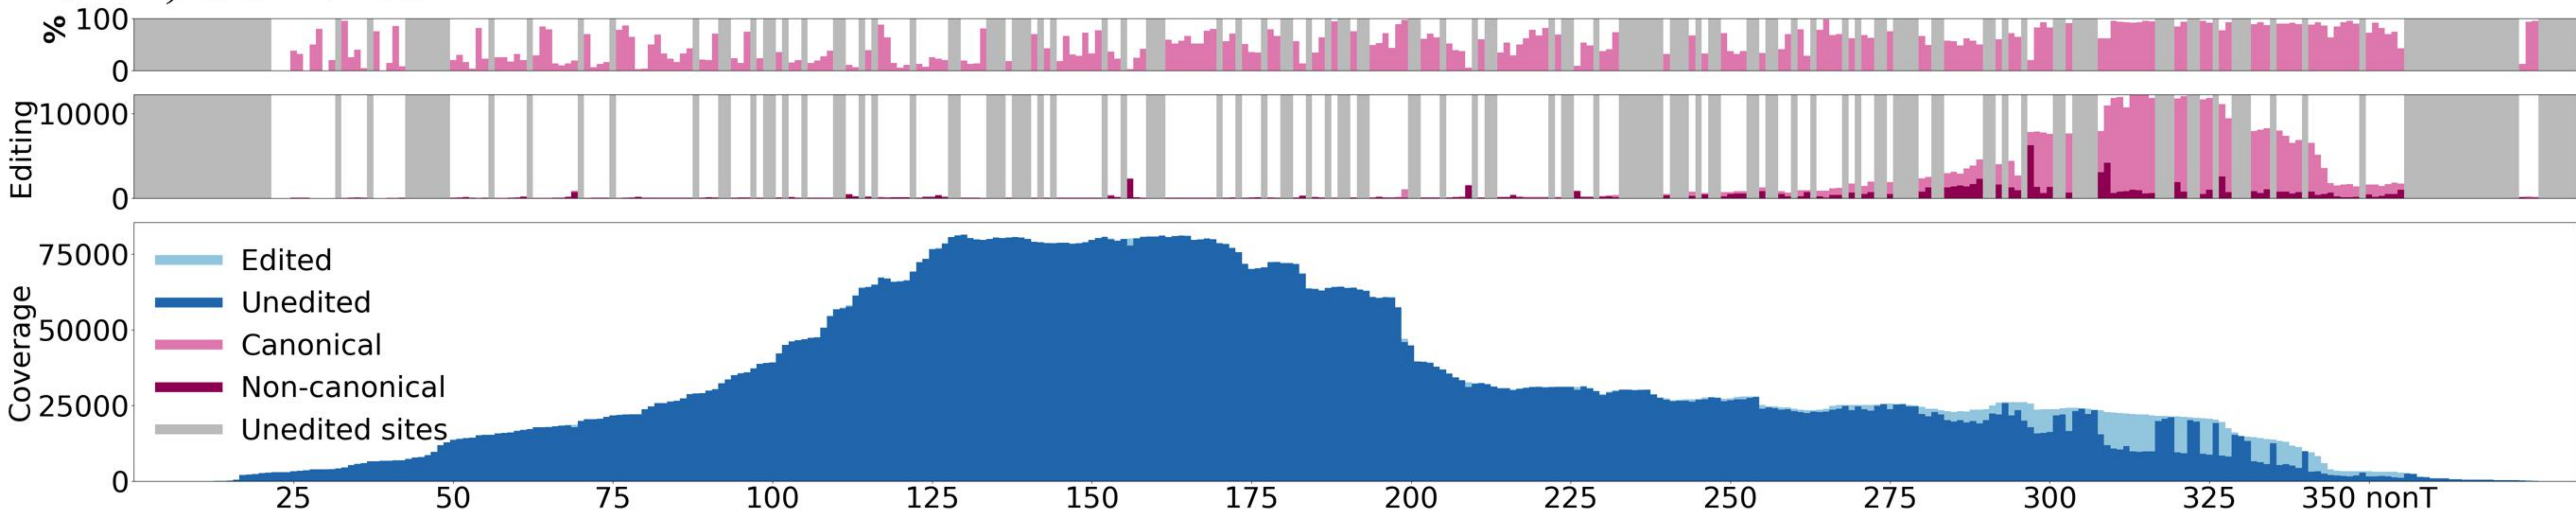

# CLB, CO3 : fed

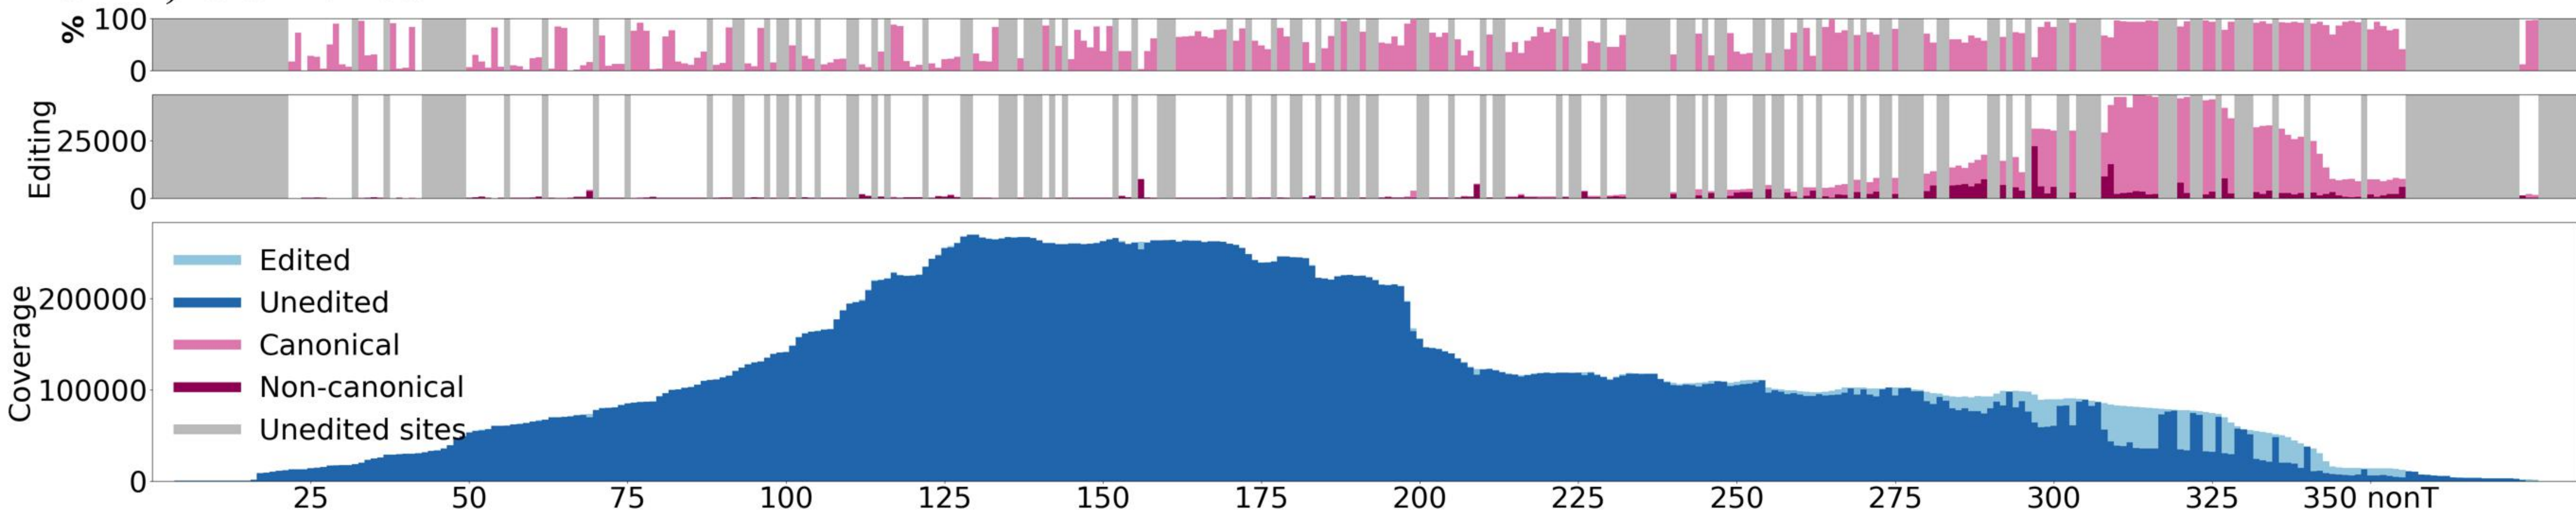

# CLB, CO3 : abrupt

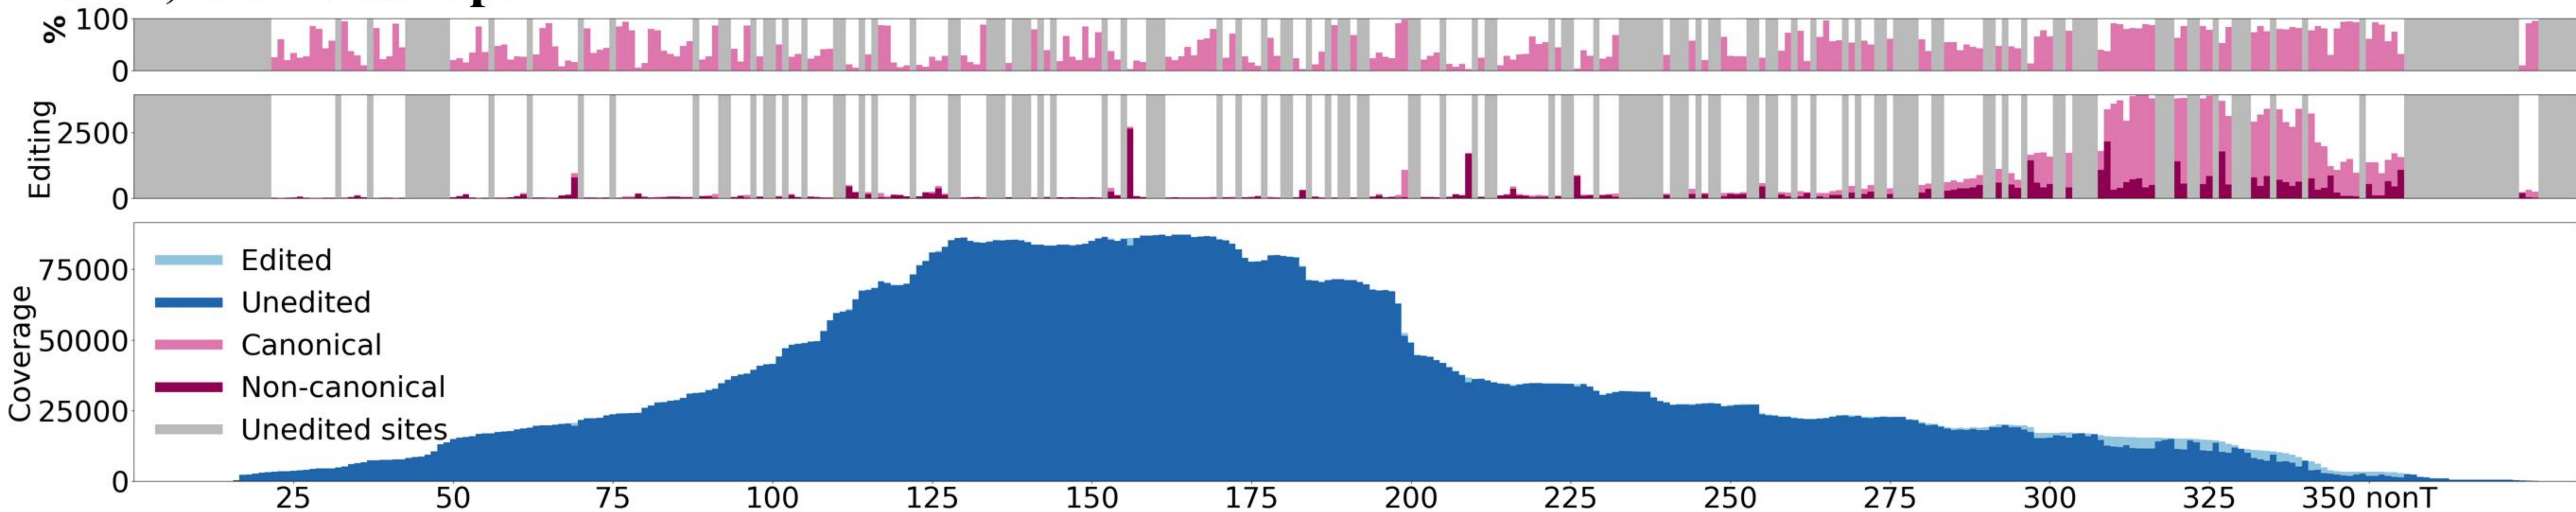

# CLB, CO3 : abrupt

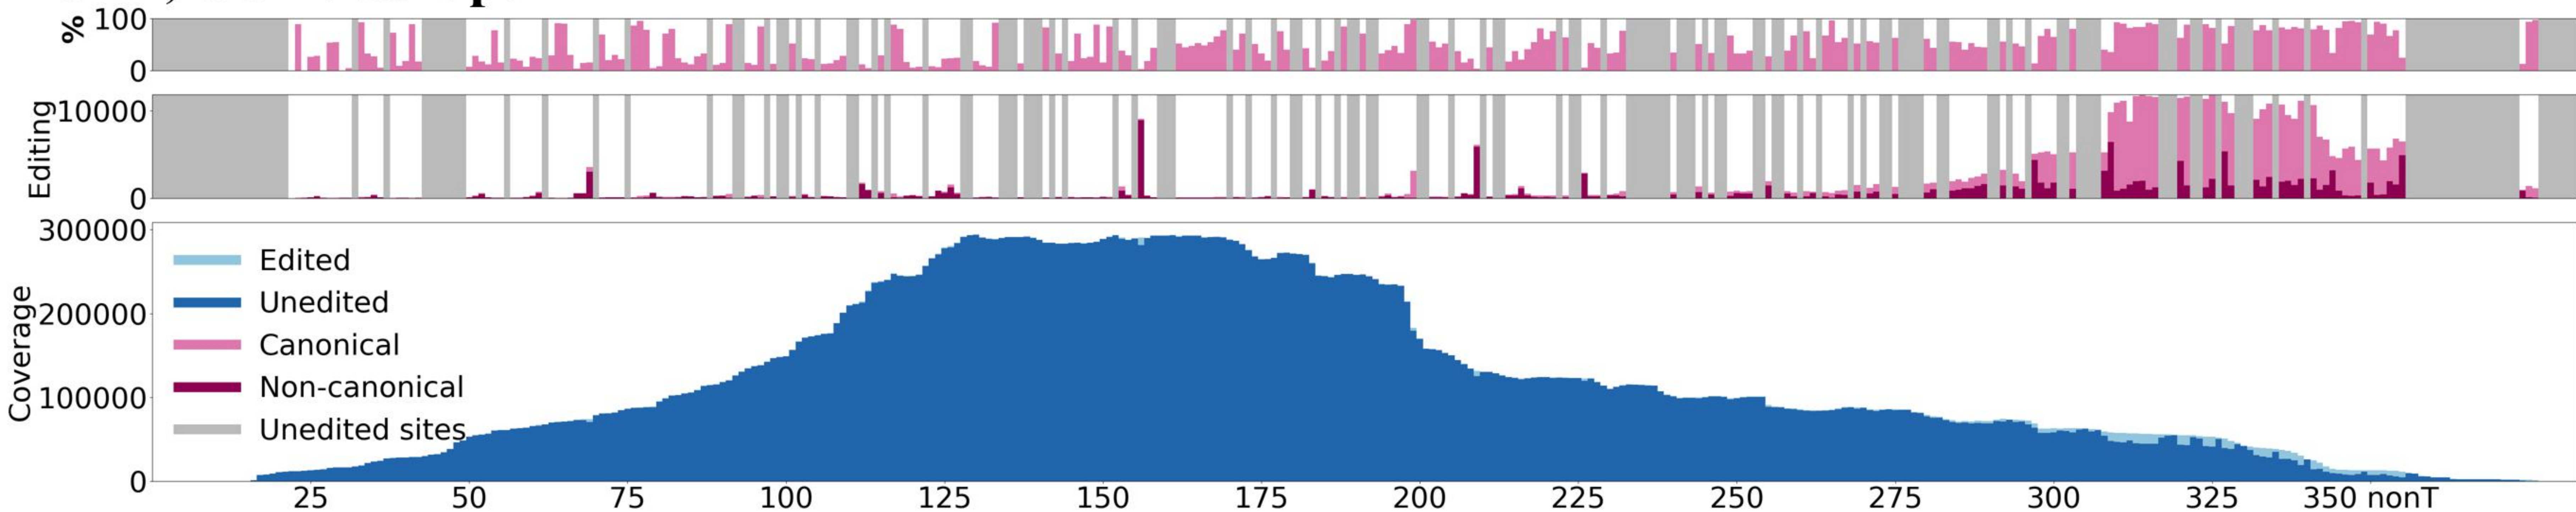

# CLB, CO3 : slow

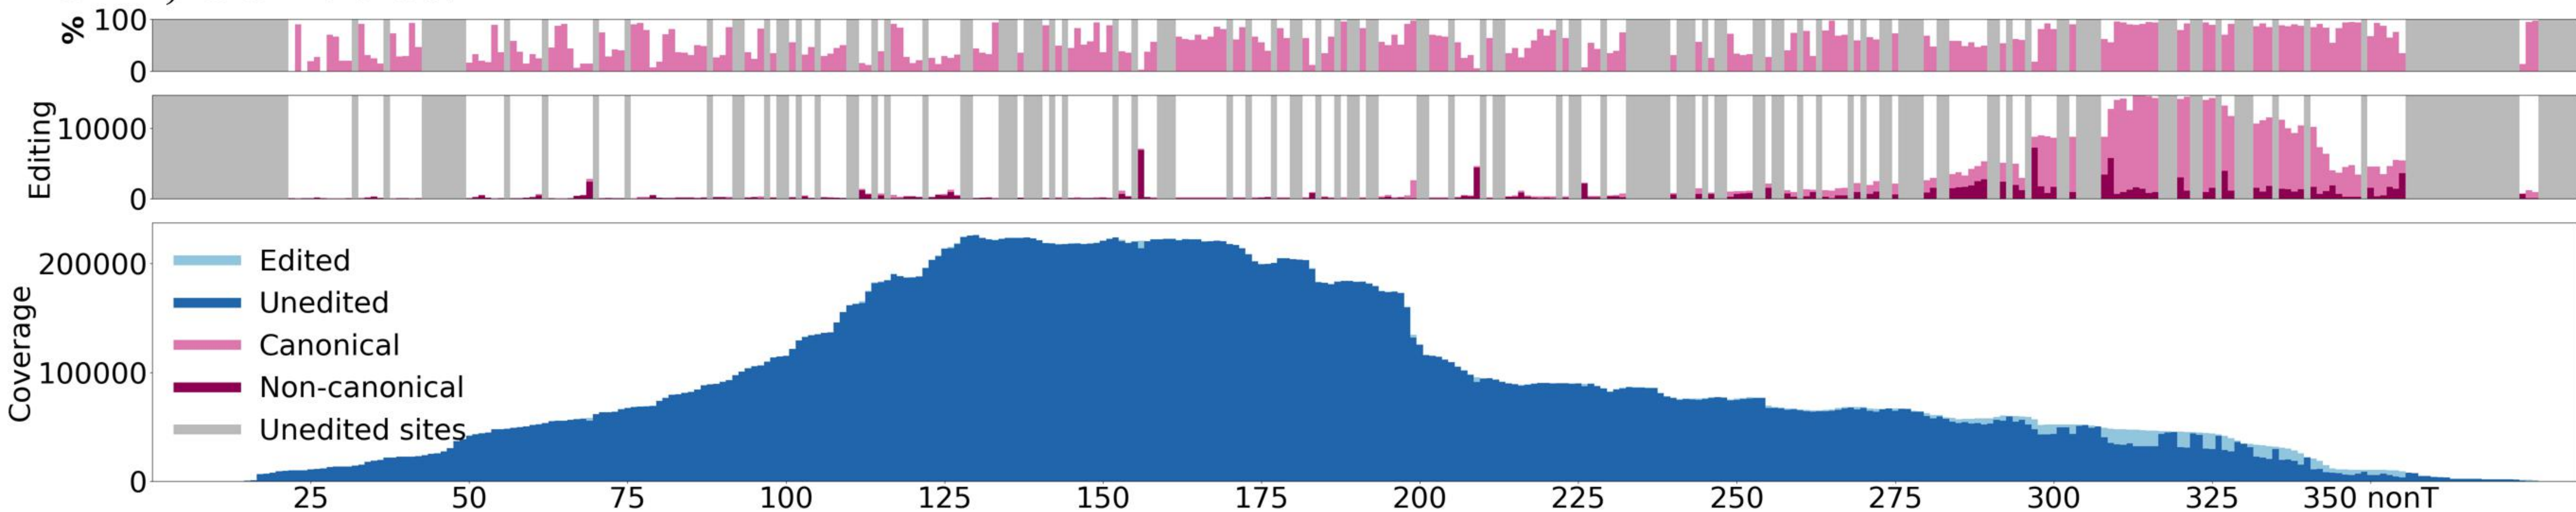

# CLB, CO3 : slow

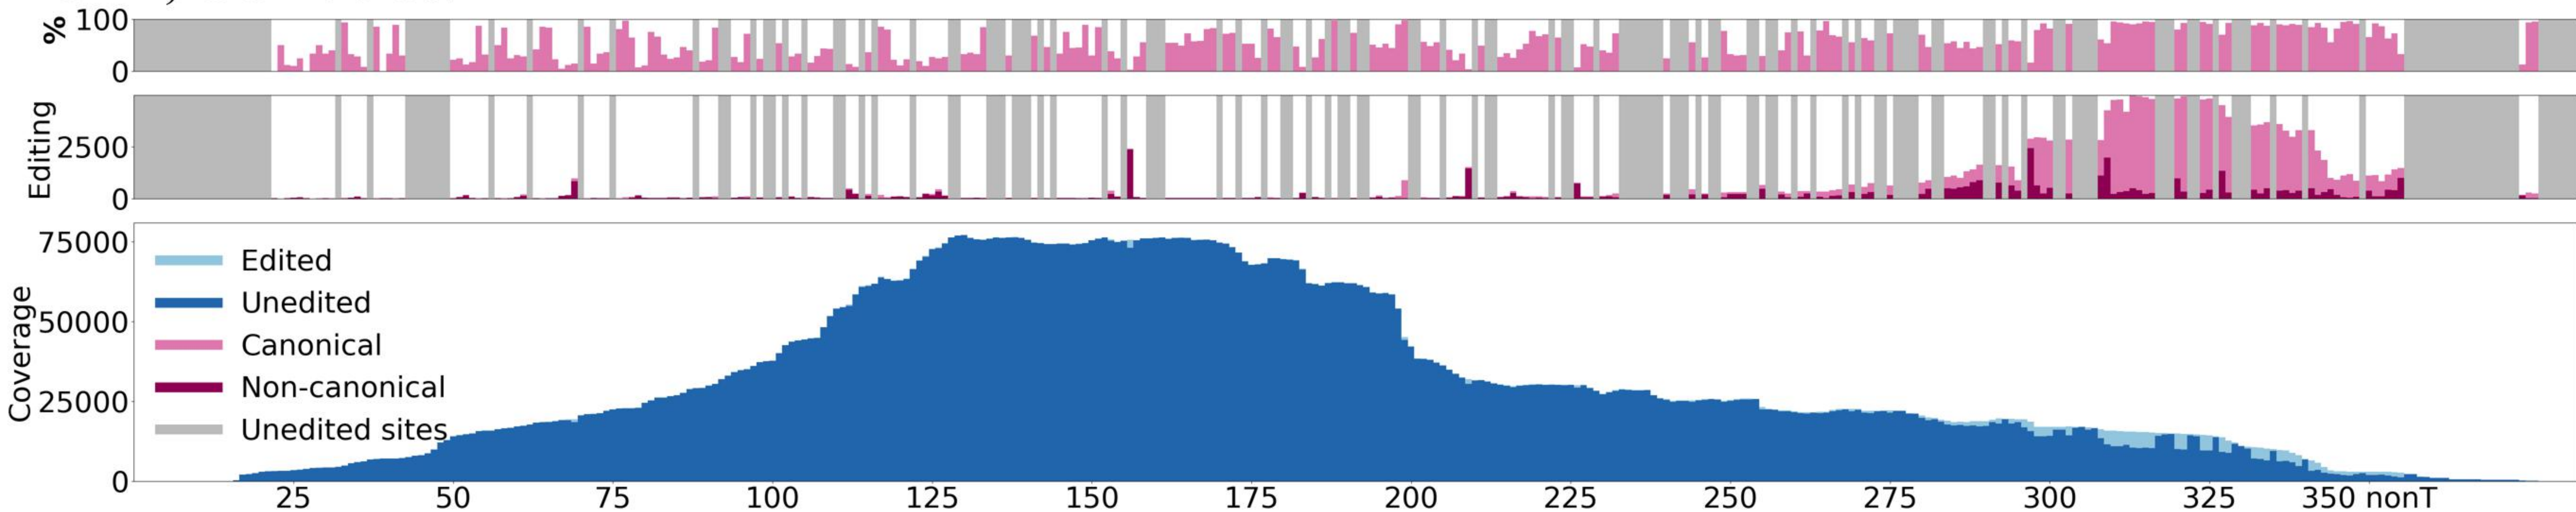

# CLB, CO3 : mito

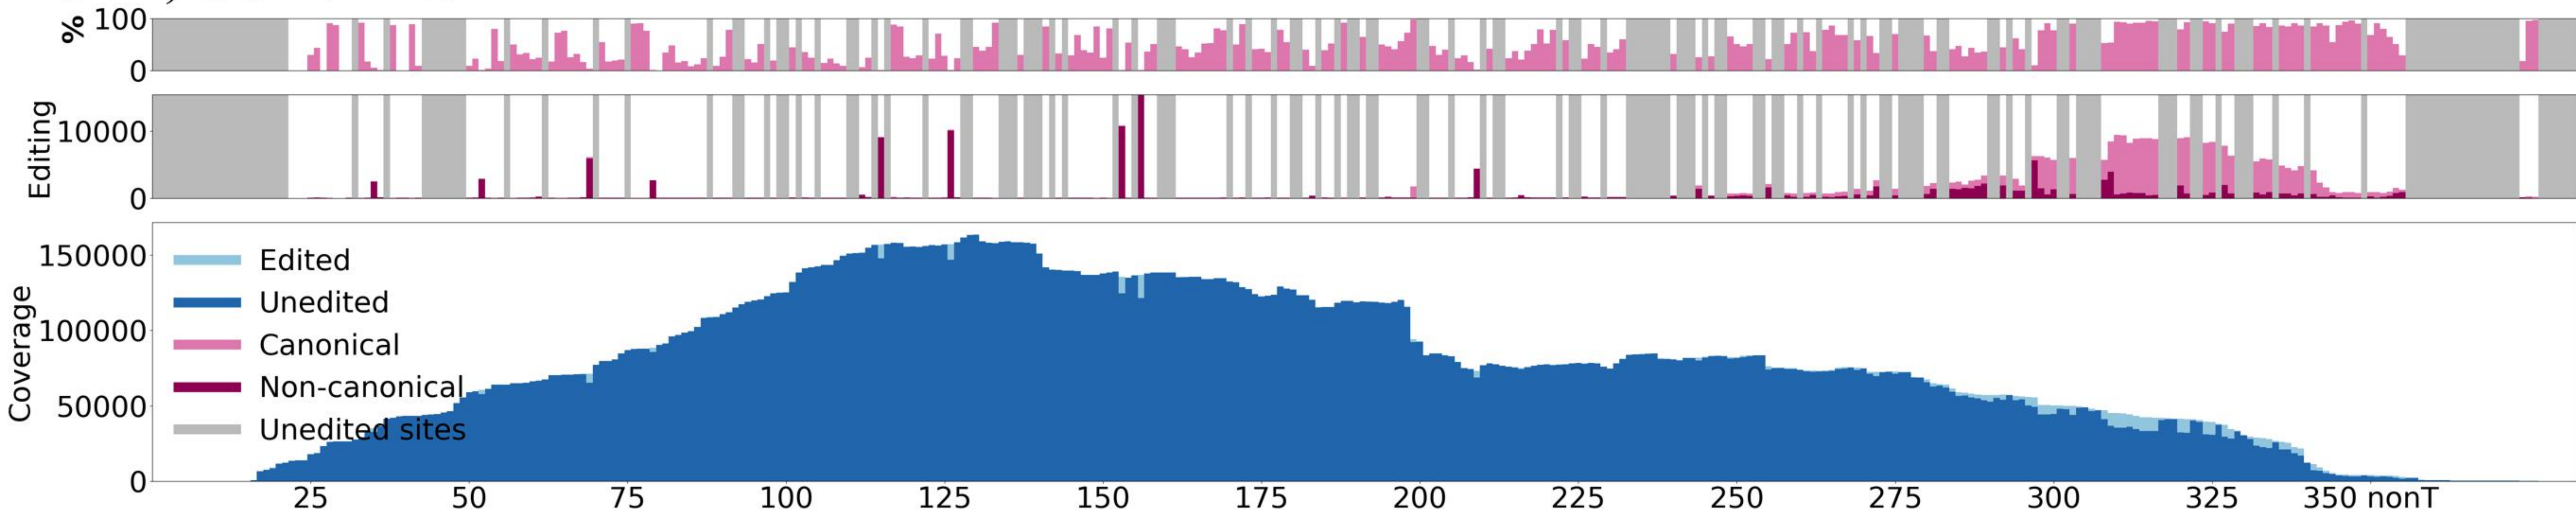

# CLB, CO3 : mito

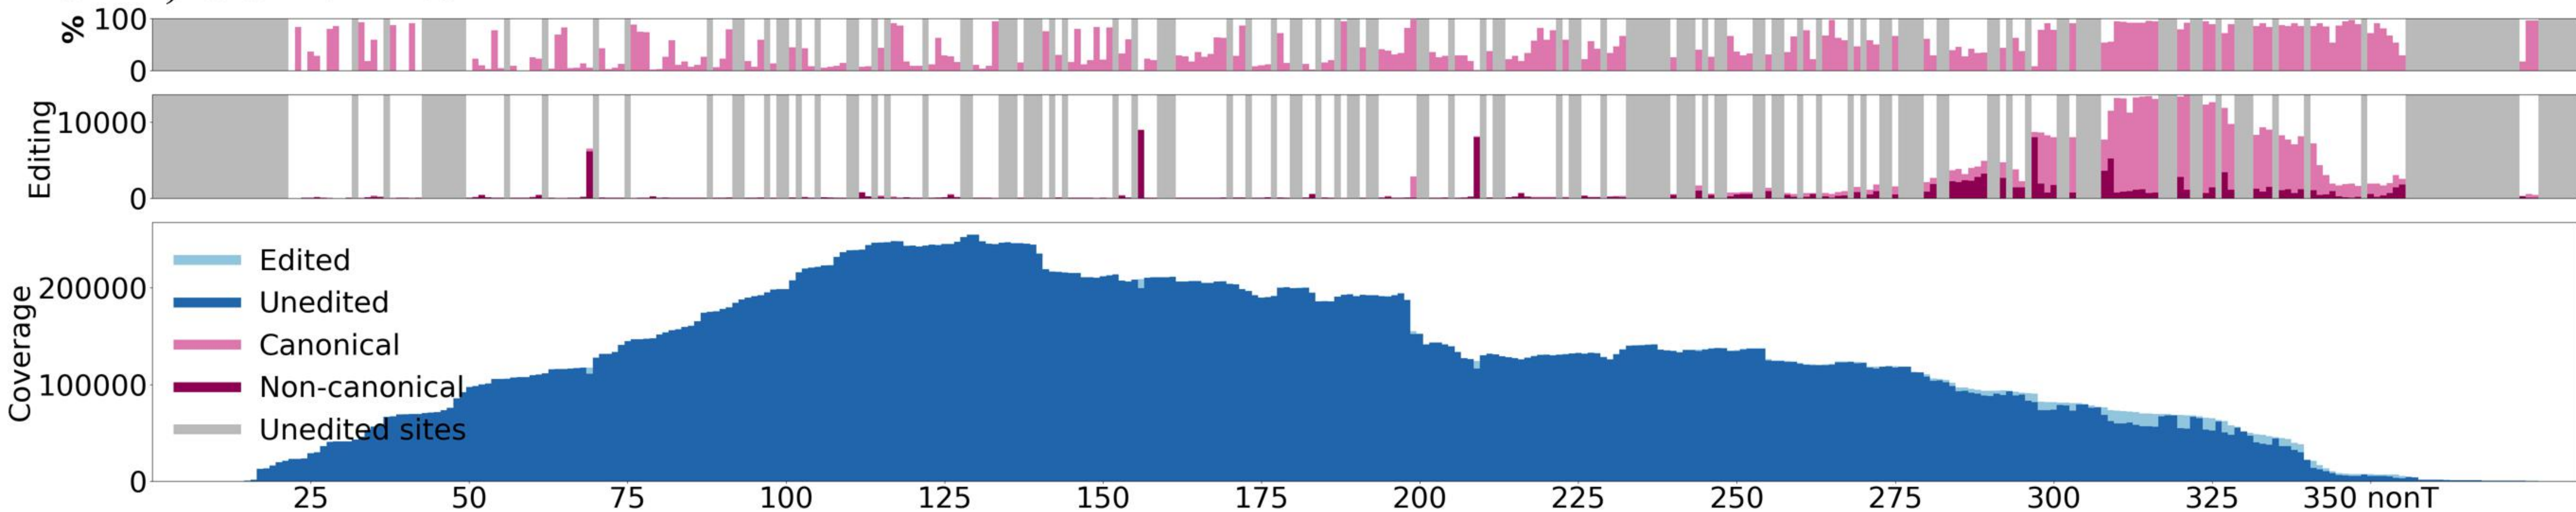

# CLB, CO3 : total

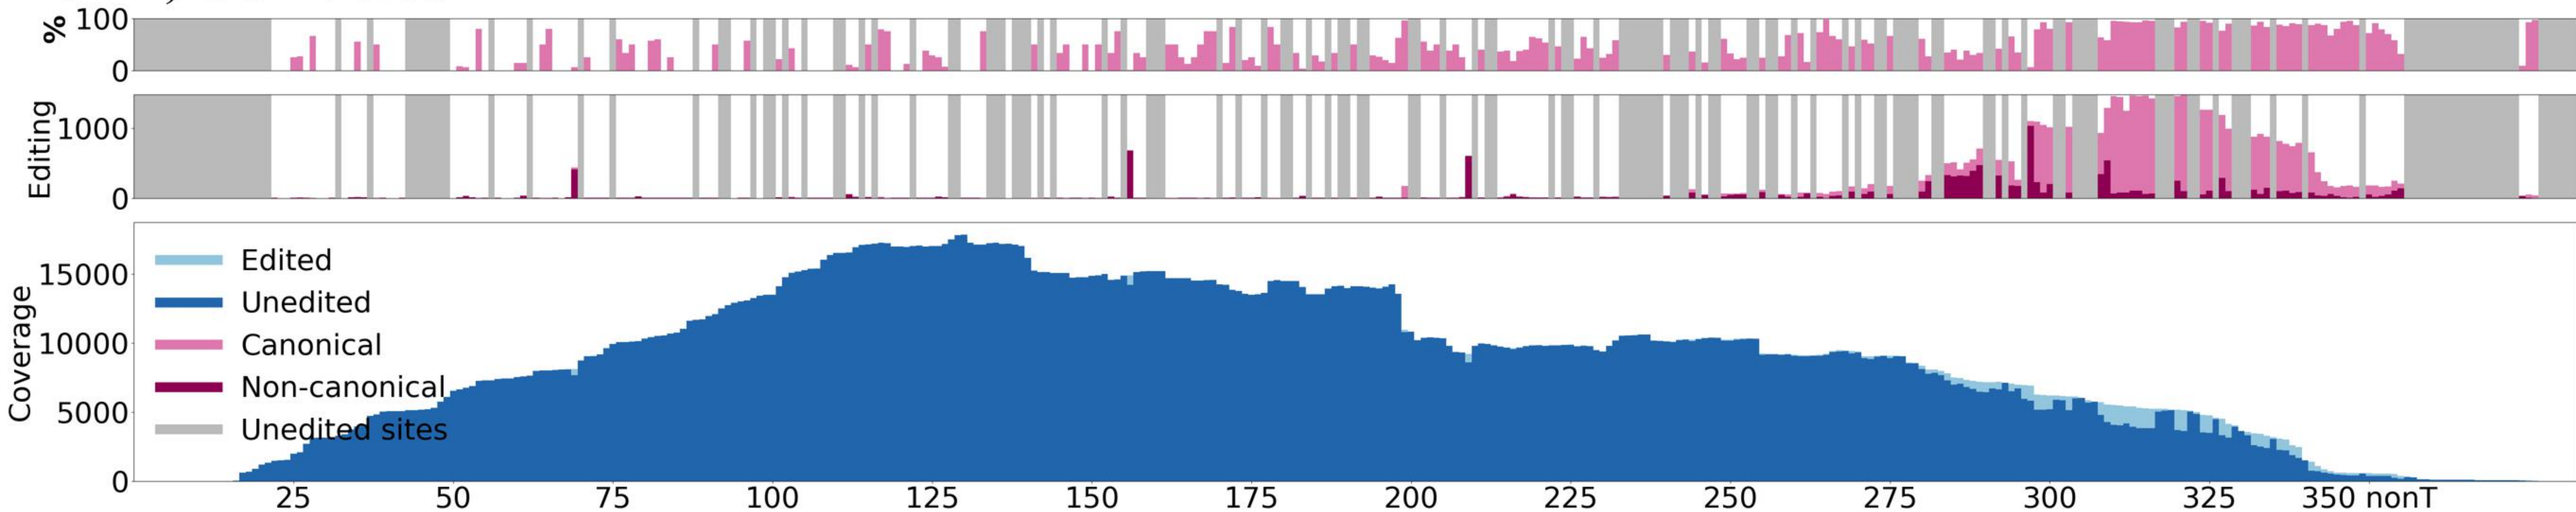

# CLB, CO3 : total

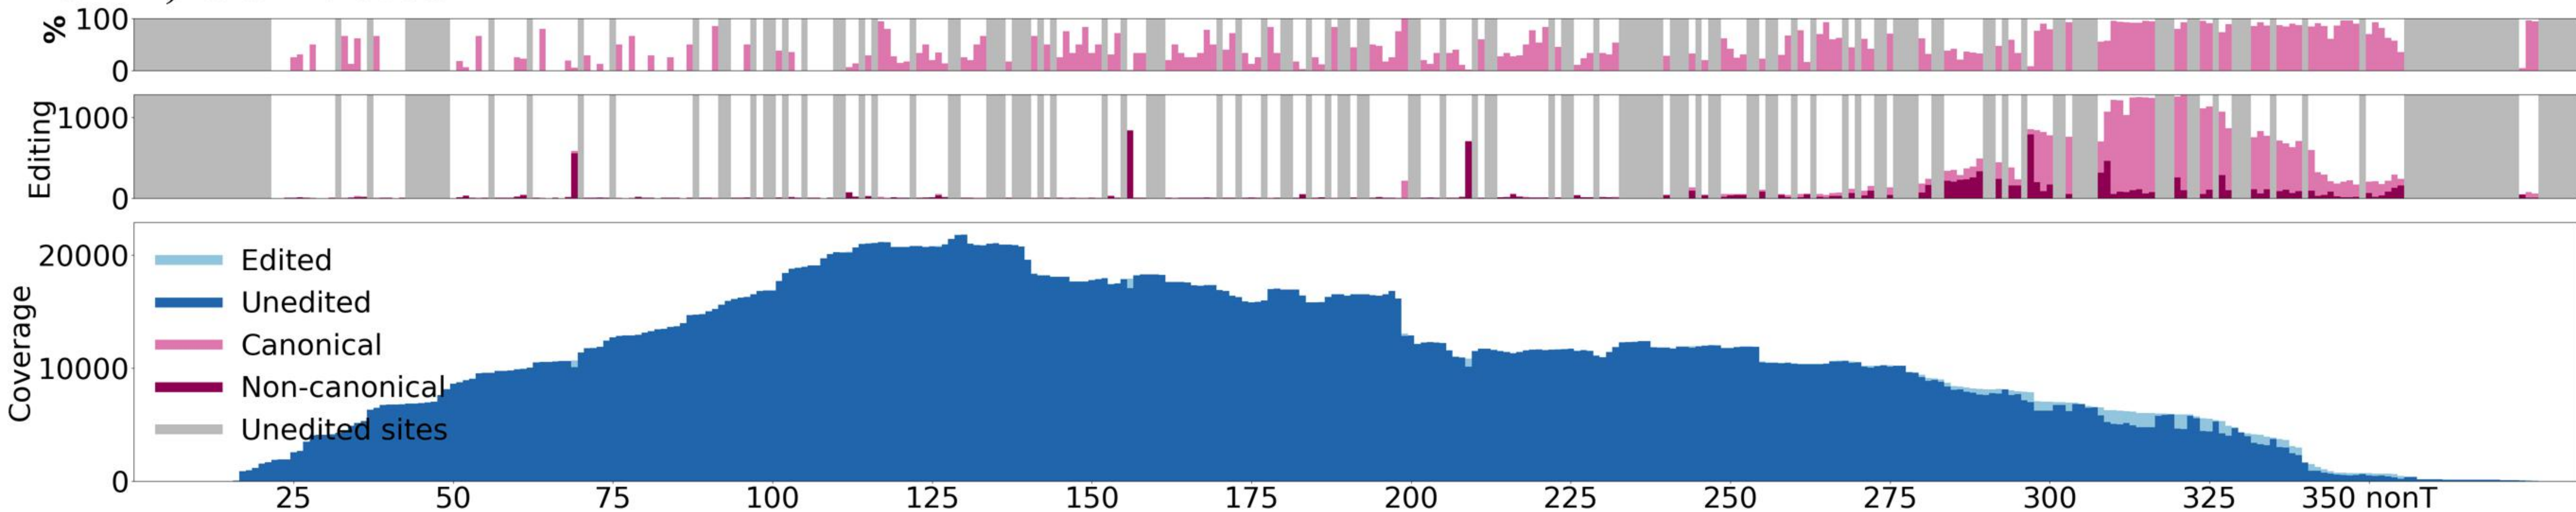

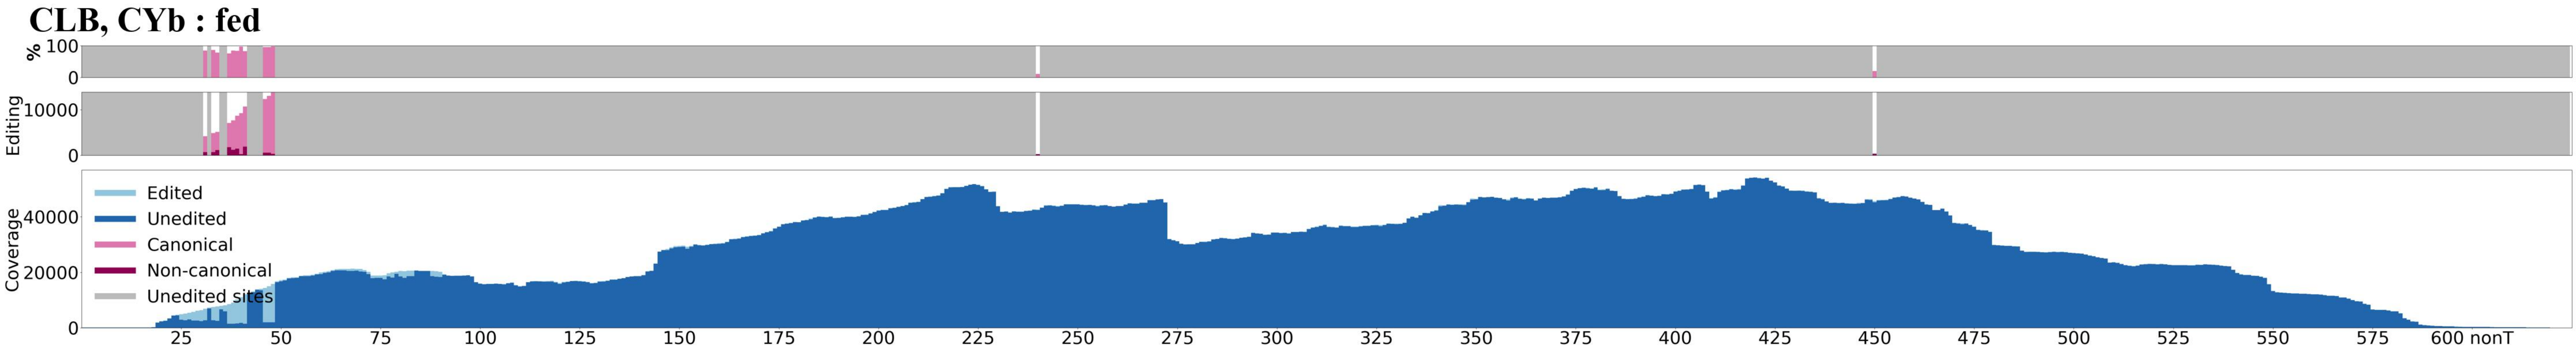

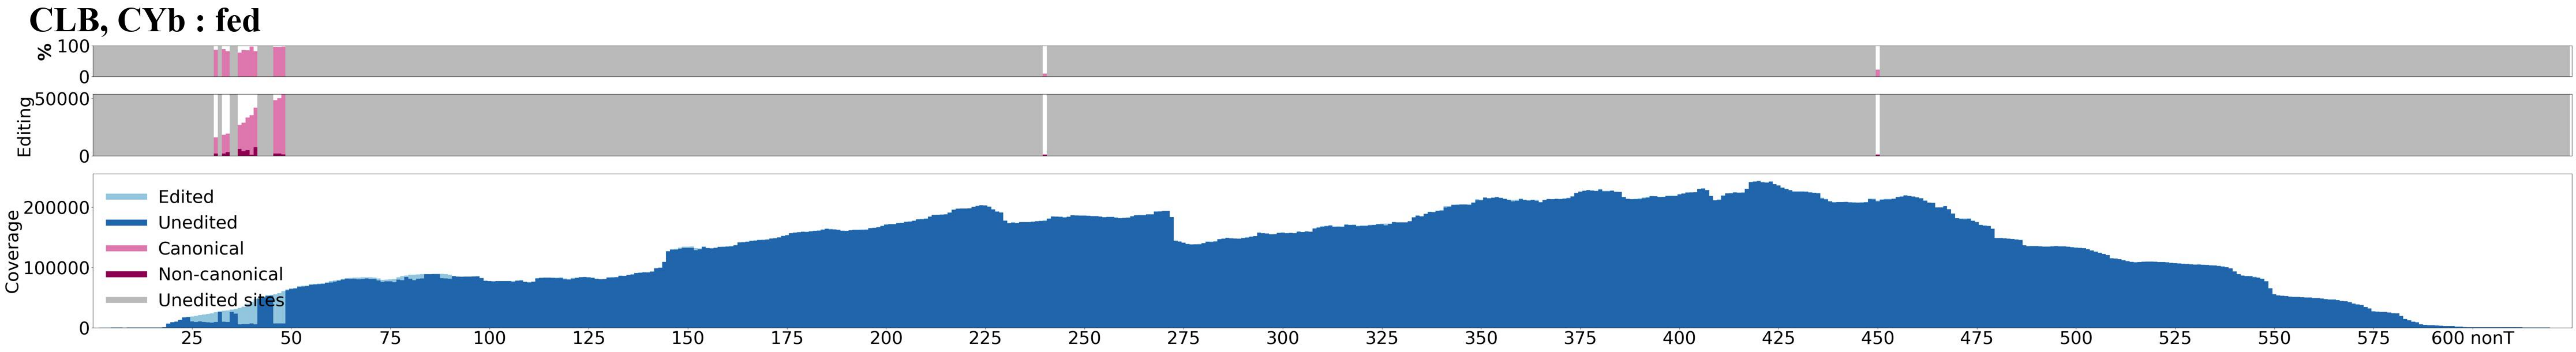

# CLB, CYb : abrupt

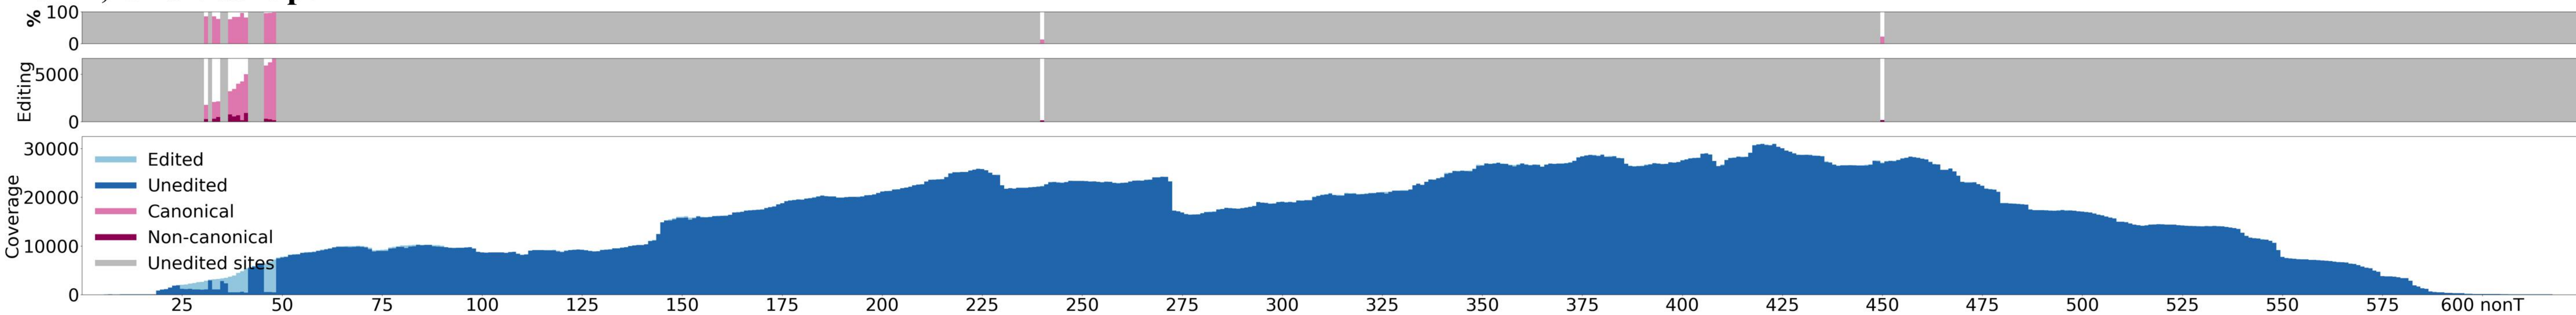

# CLB, CYb : abrupt

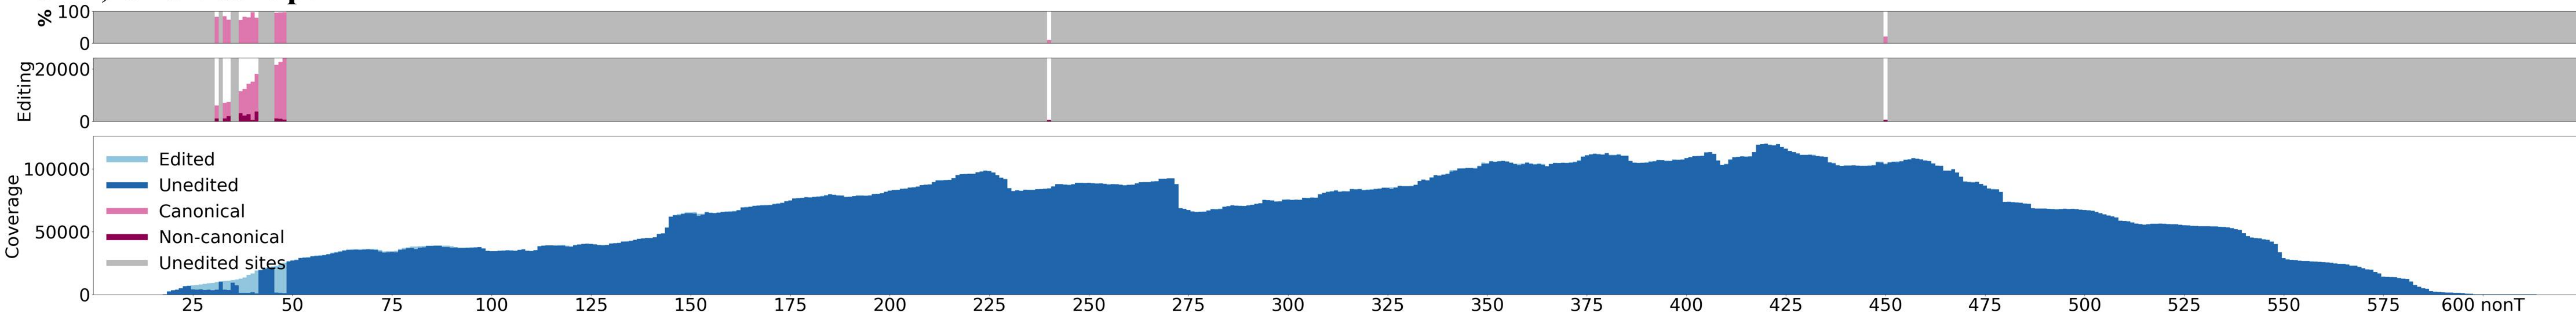

# CLB, CYb : slow

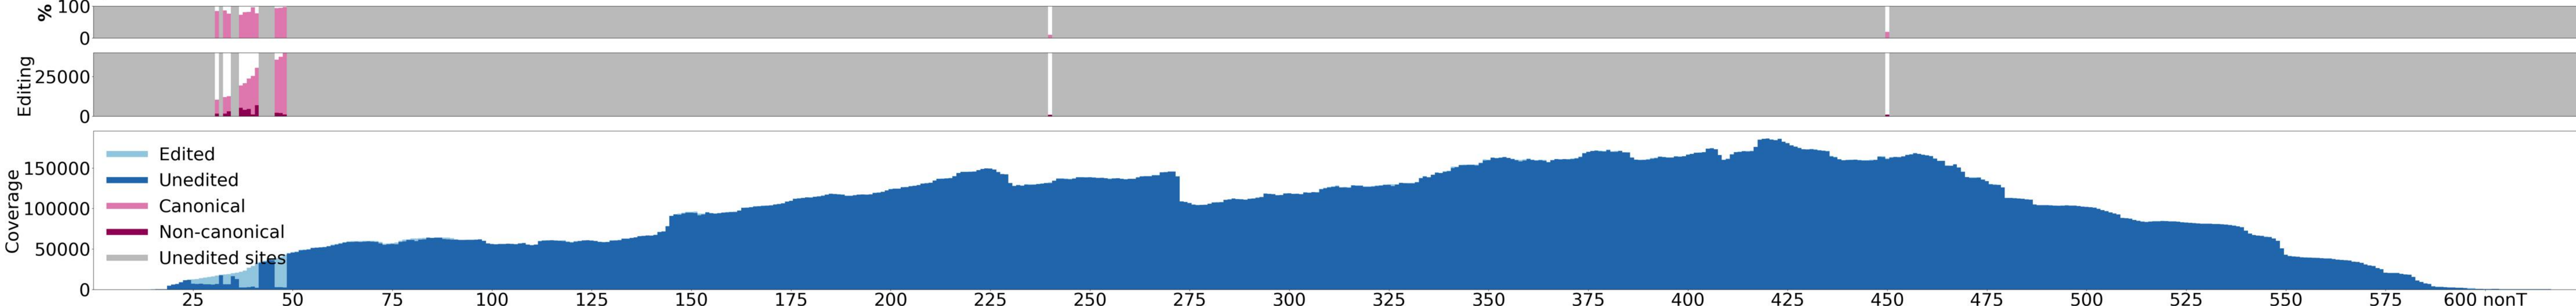

# CLB, CYb : slow

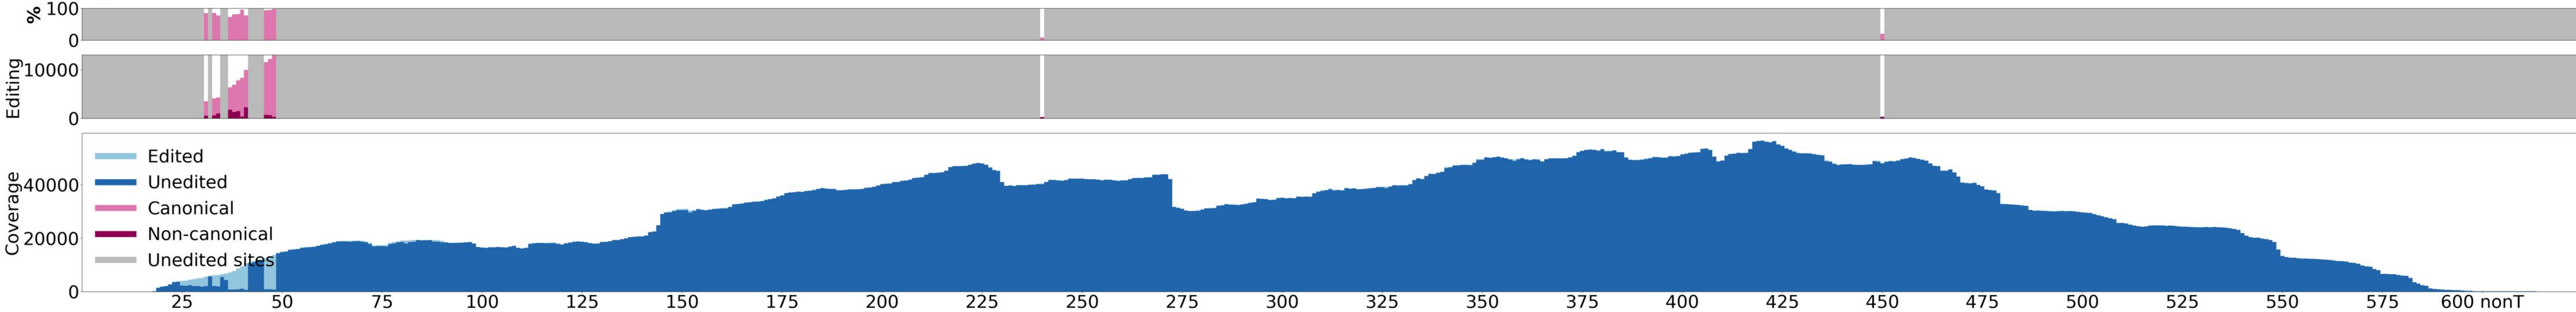

# CLB, CYb : mito

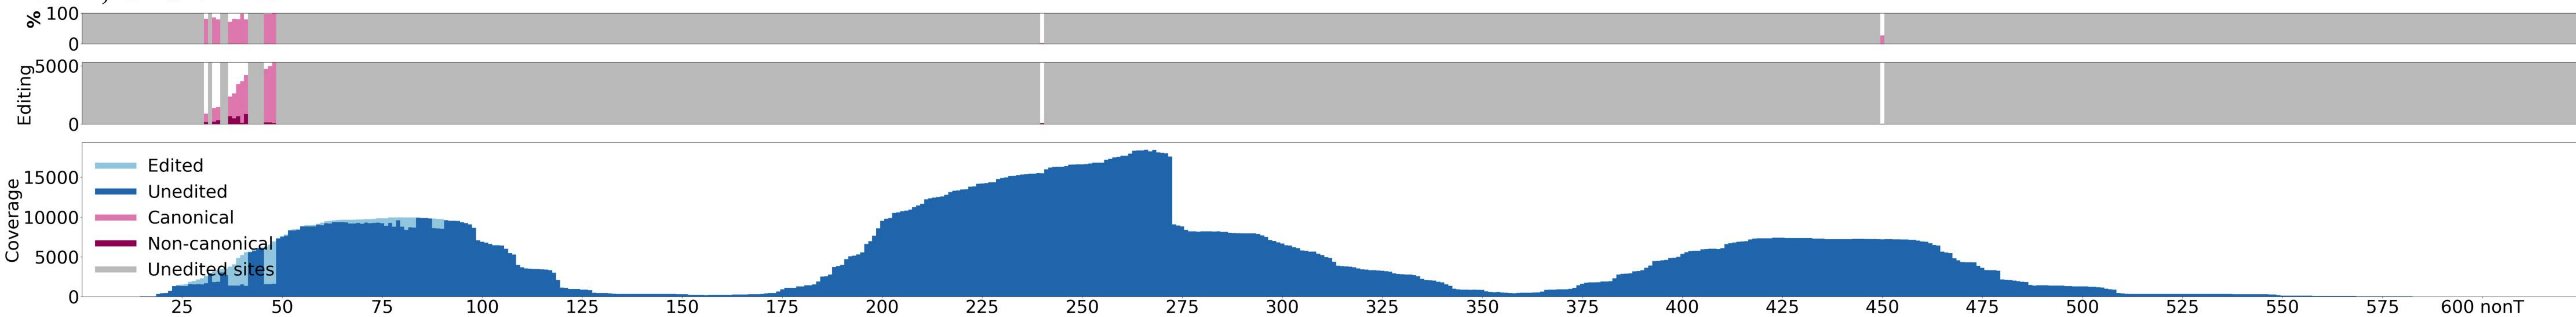

# CLB, CYb : mito

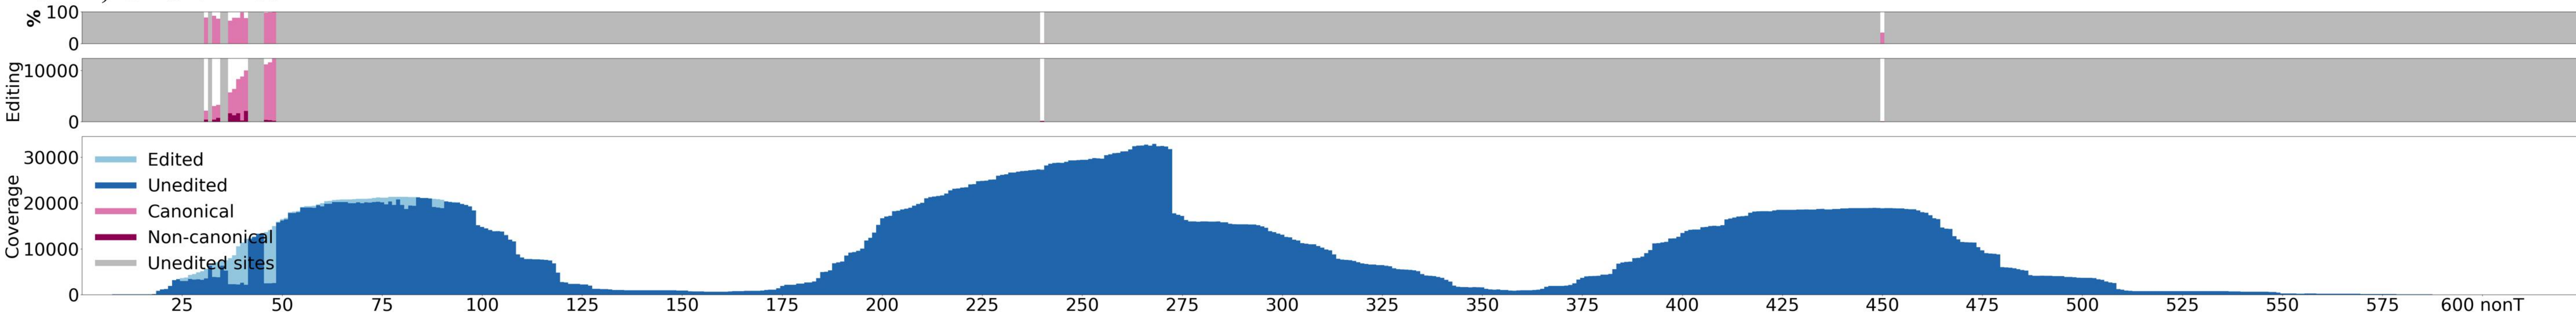

# CLB, CYb : total

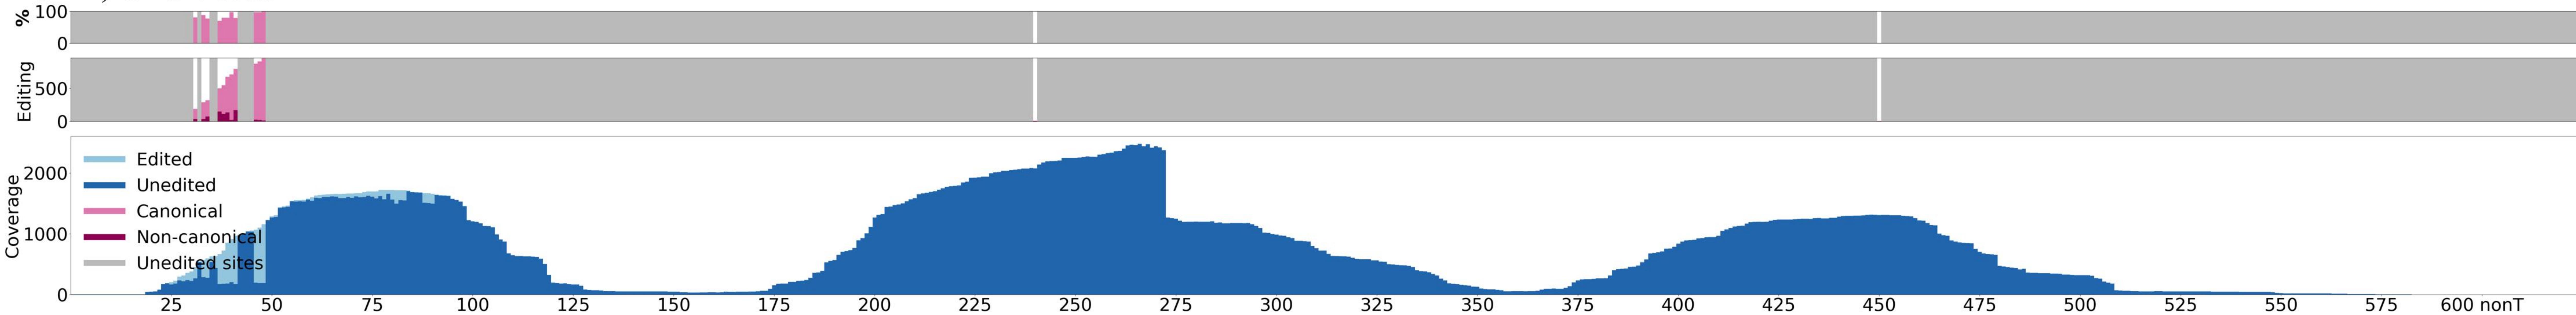

# CLB, CYb : total

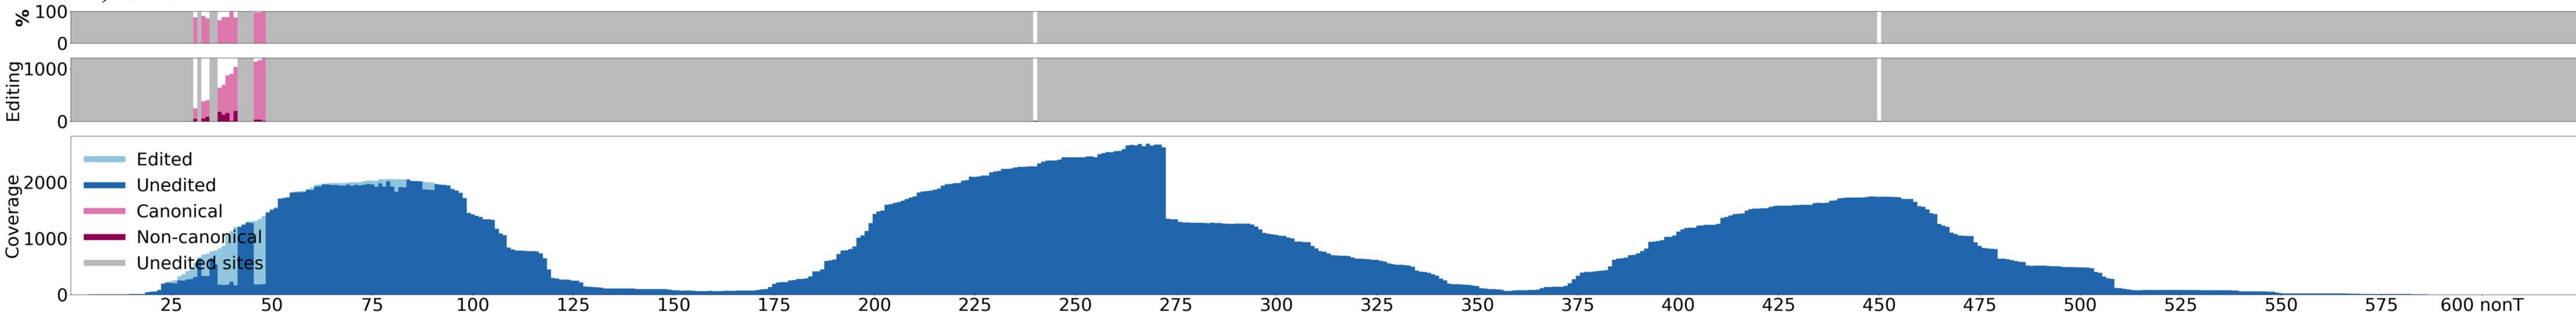

# CLB, RPS12 : fed

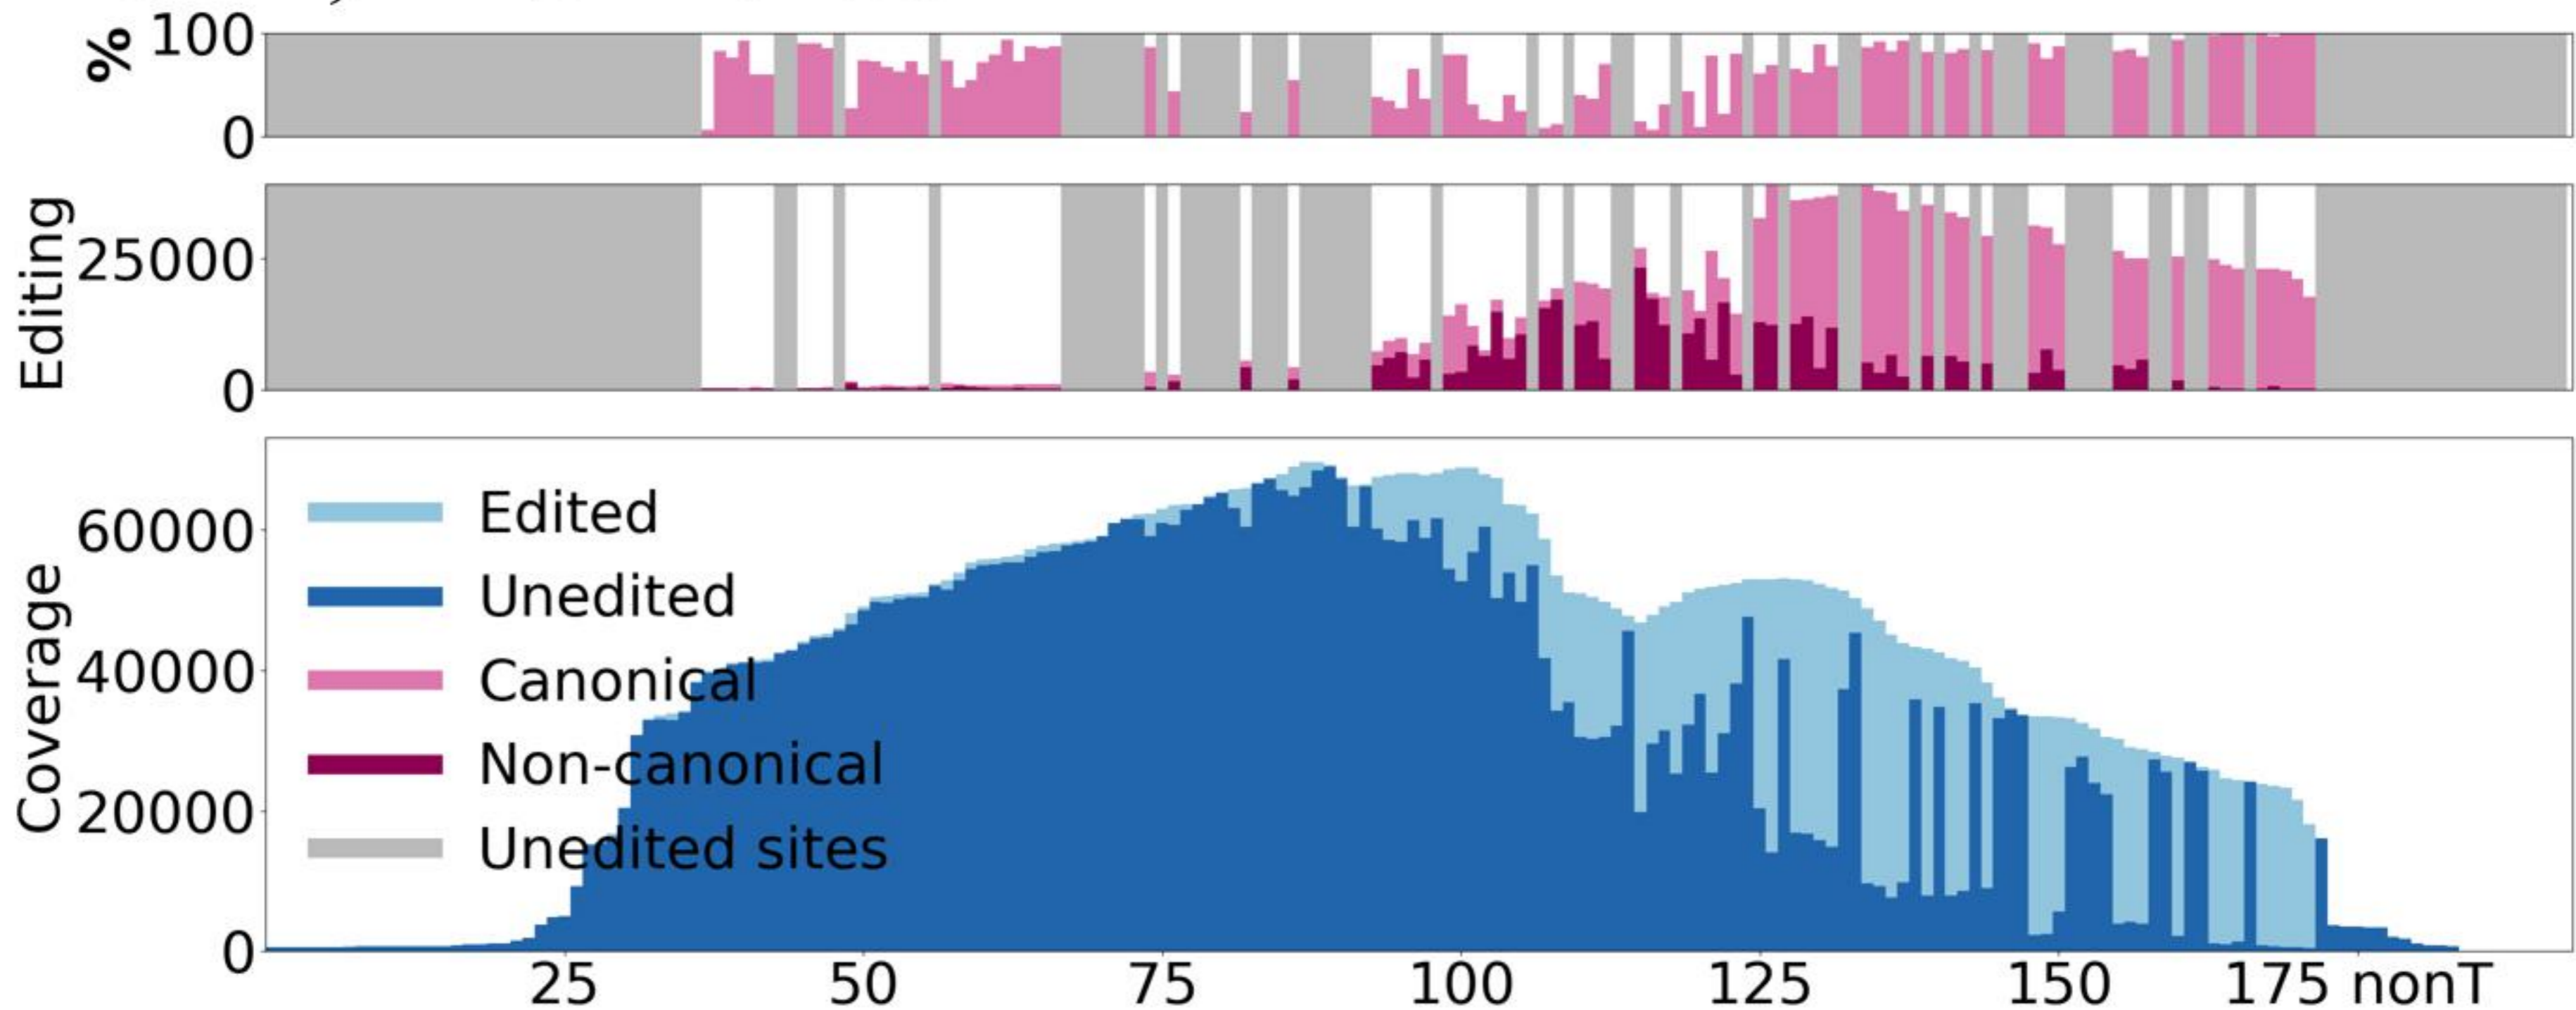

# CLB, RPS12 : fed

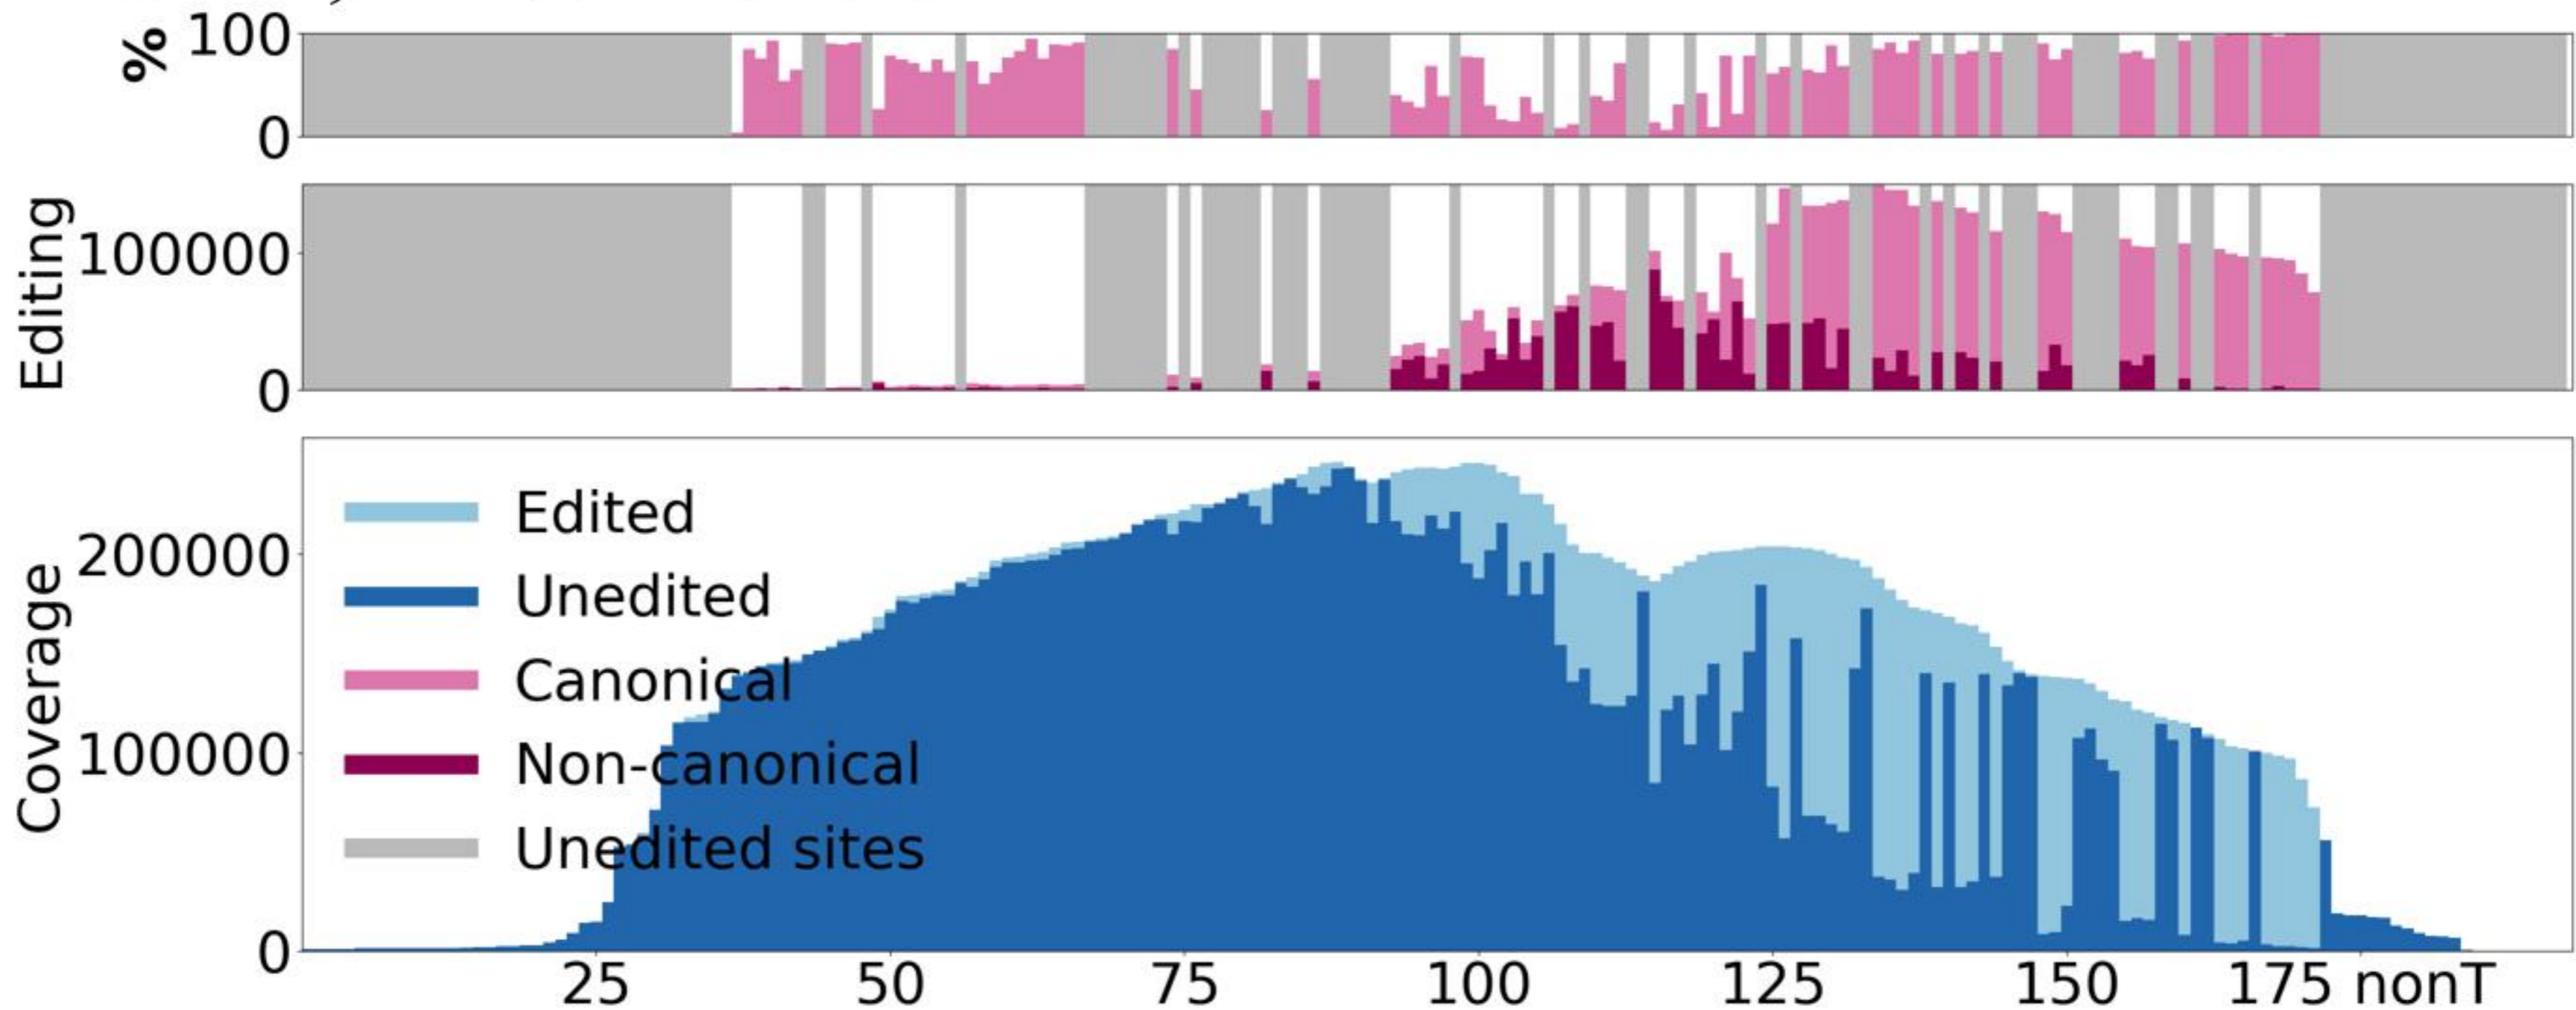

# CLB, RPS12 : abrupt

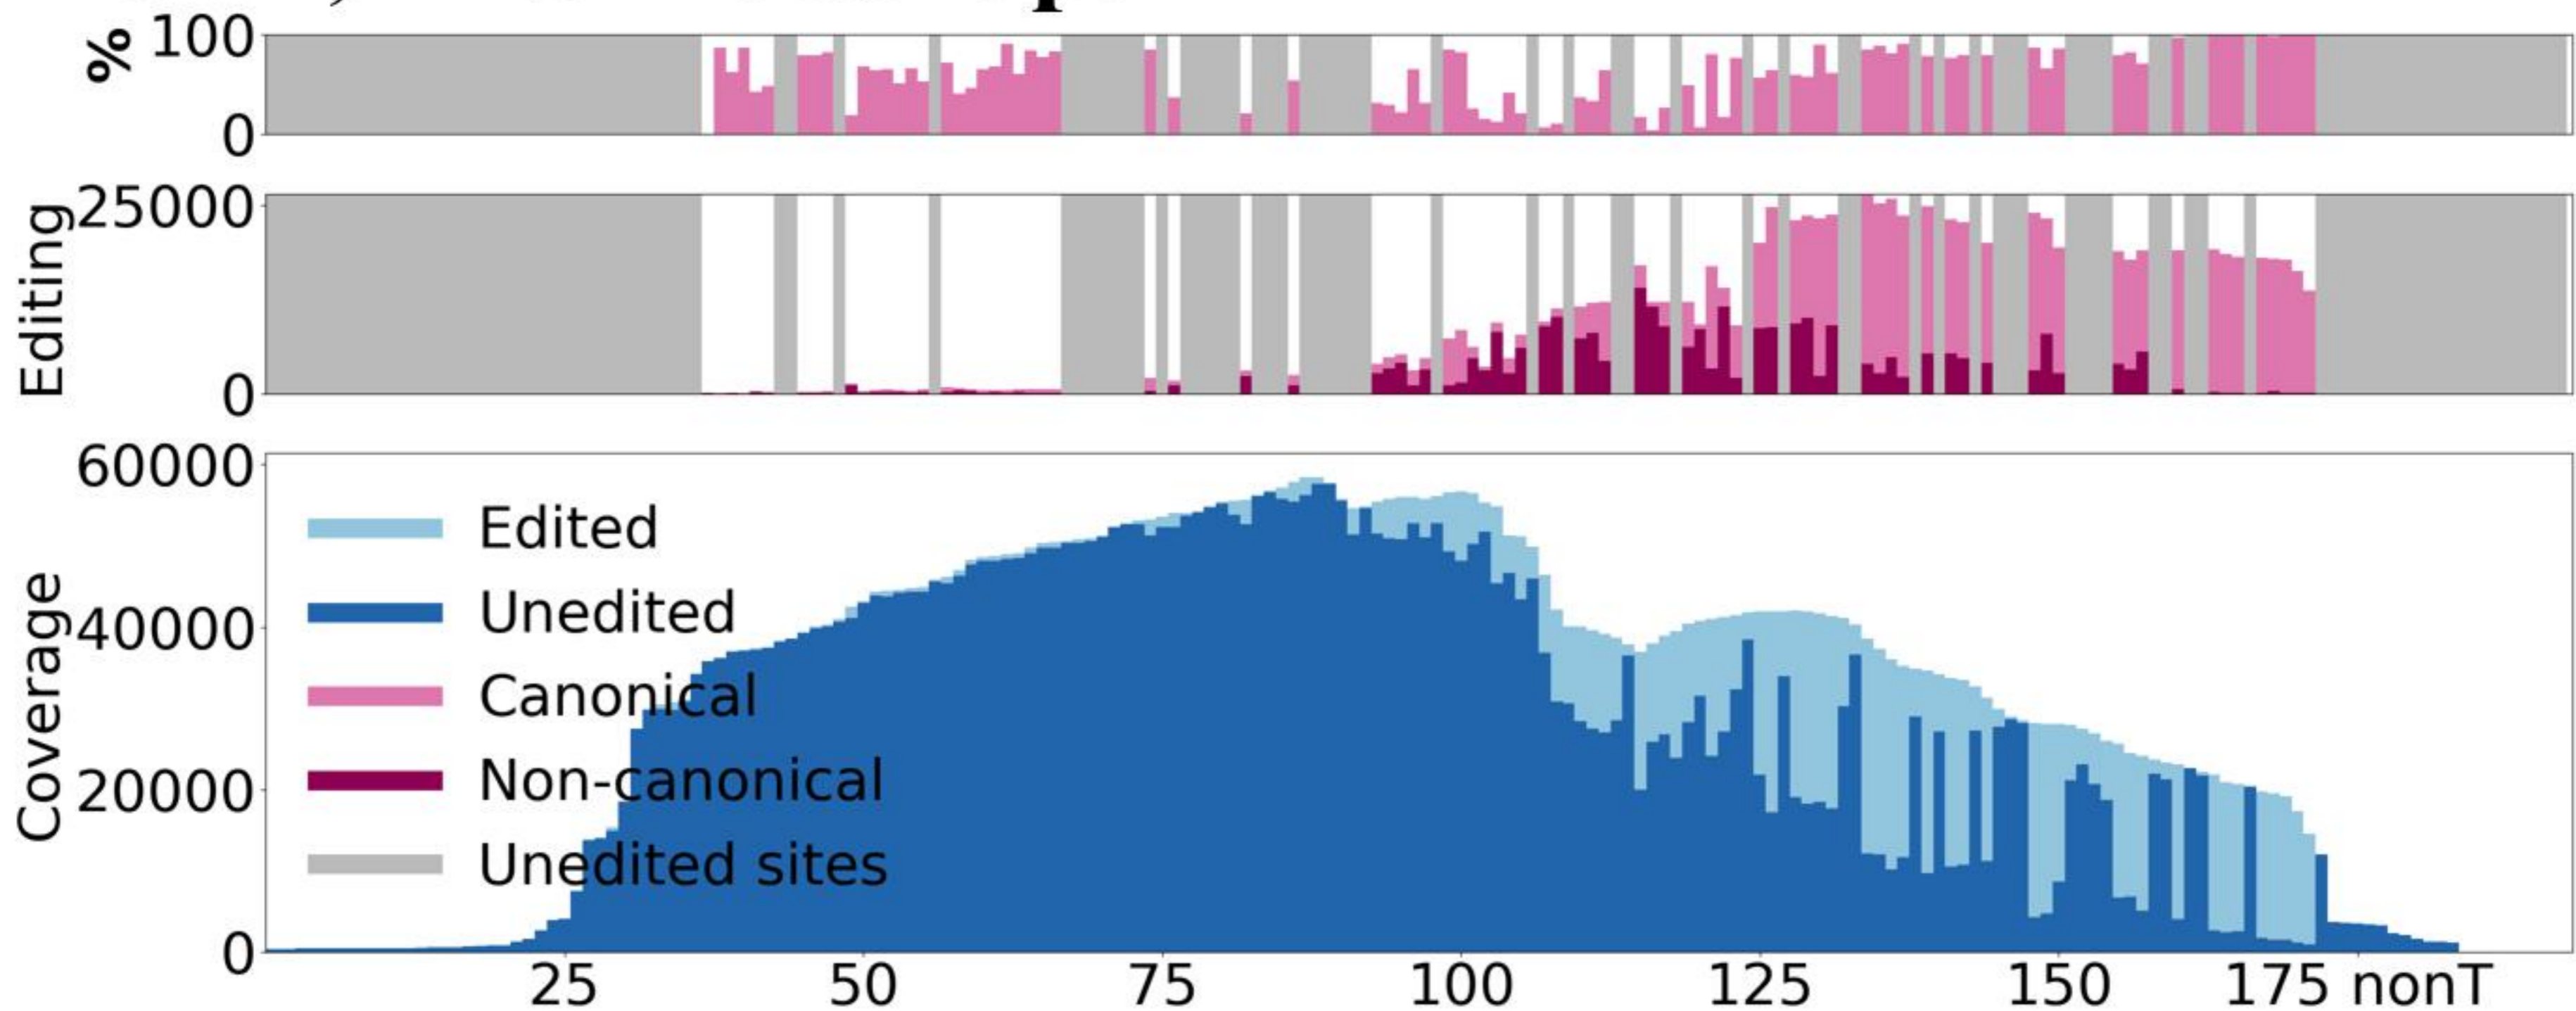

# CLB, RPS12 : abrupt

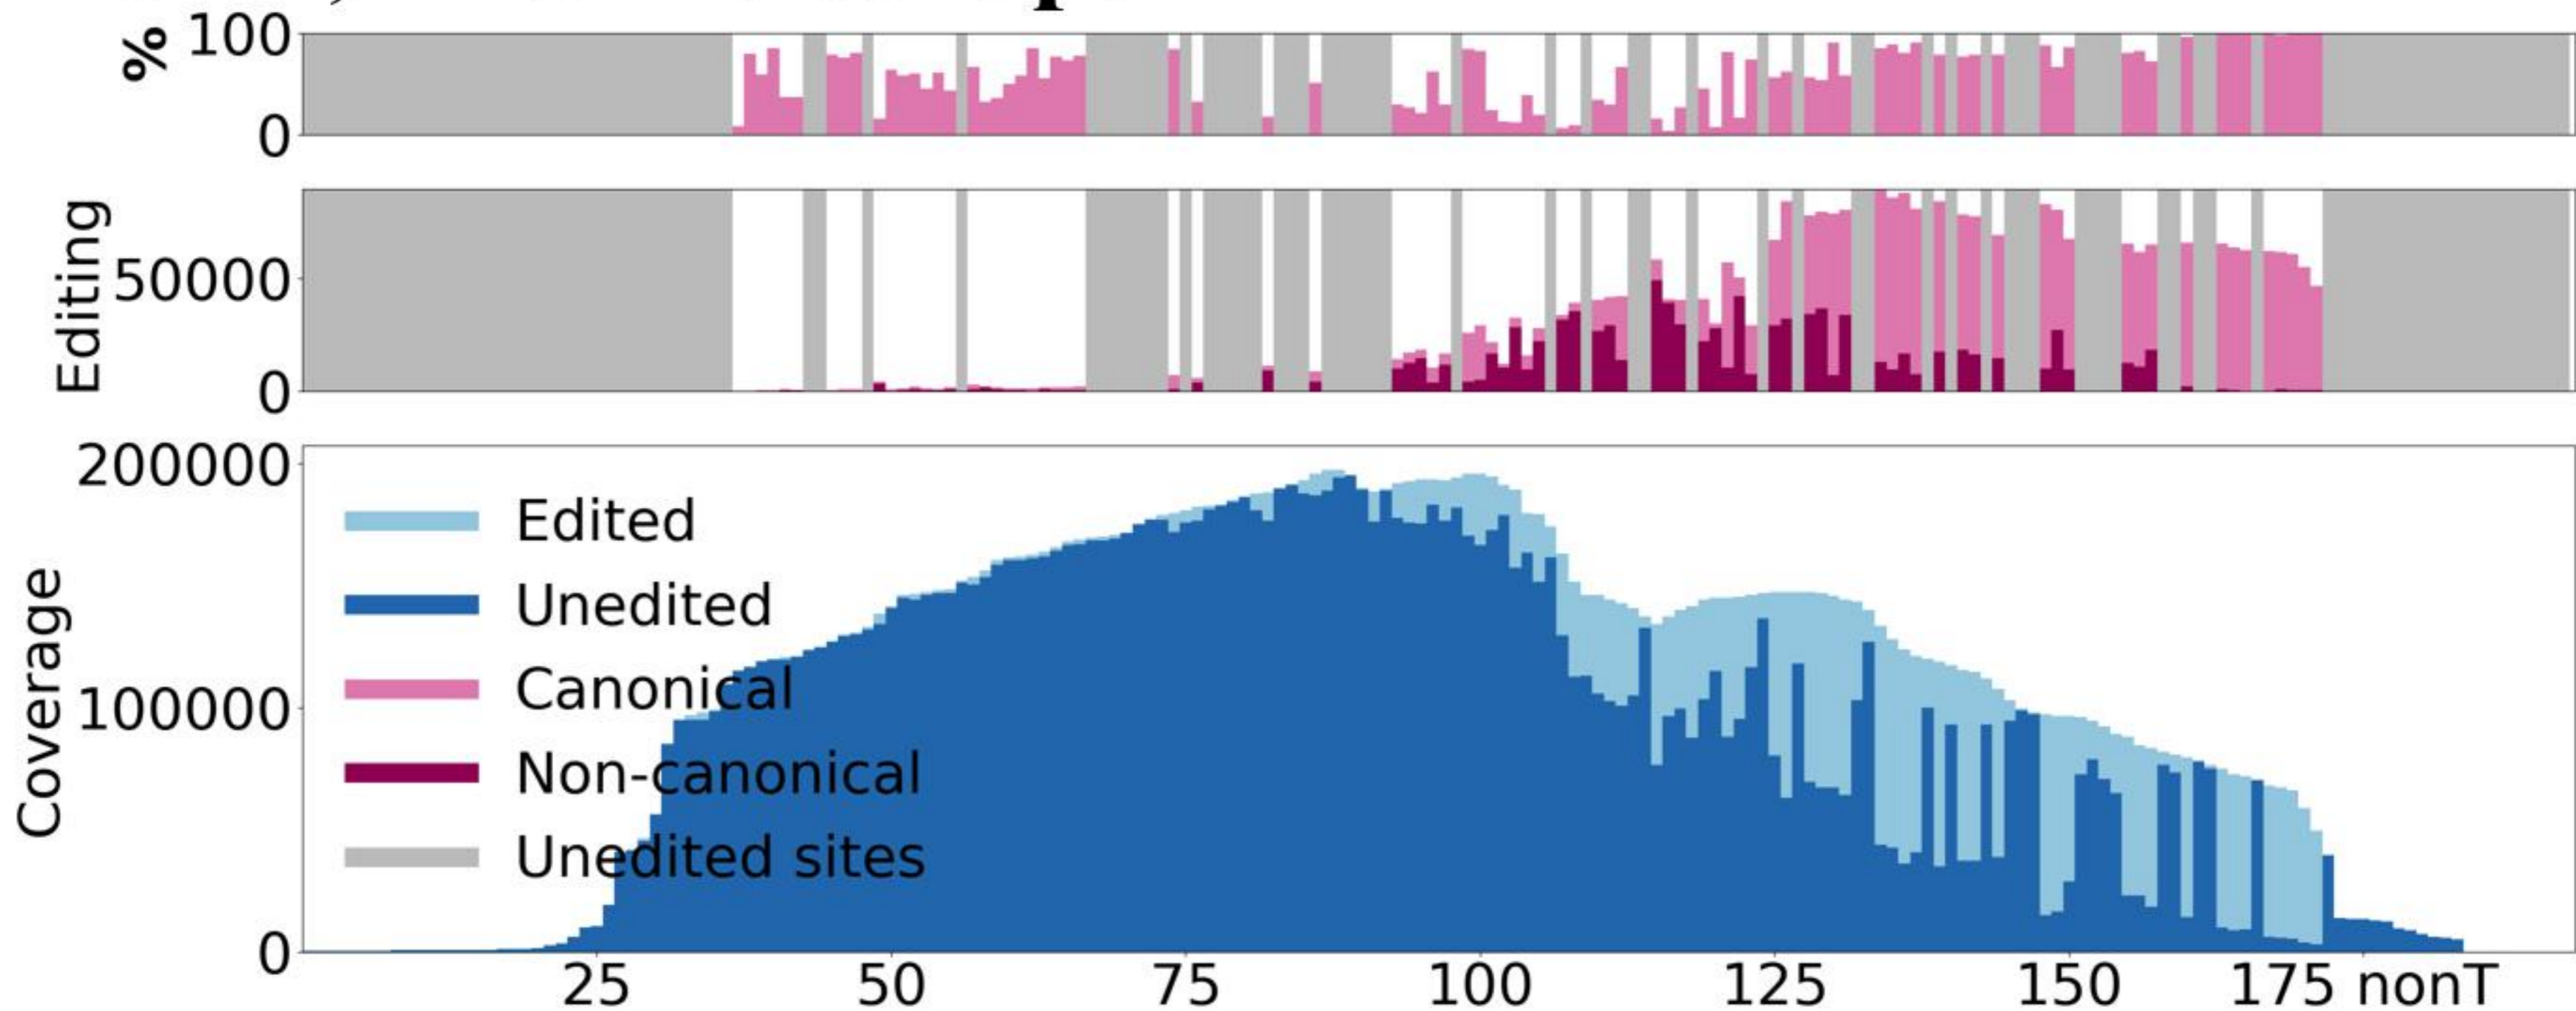

# CLB, RPS12 : slow

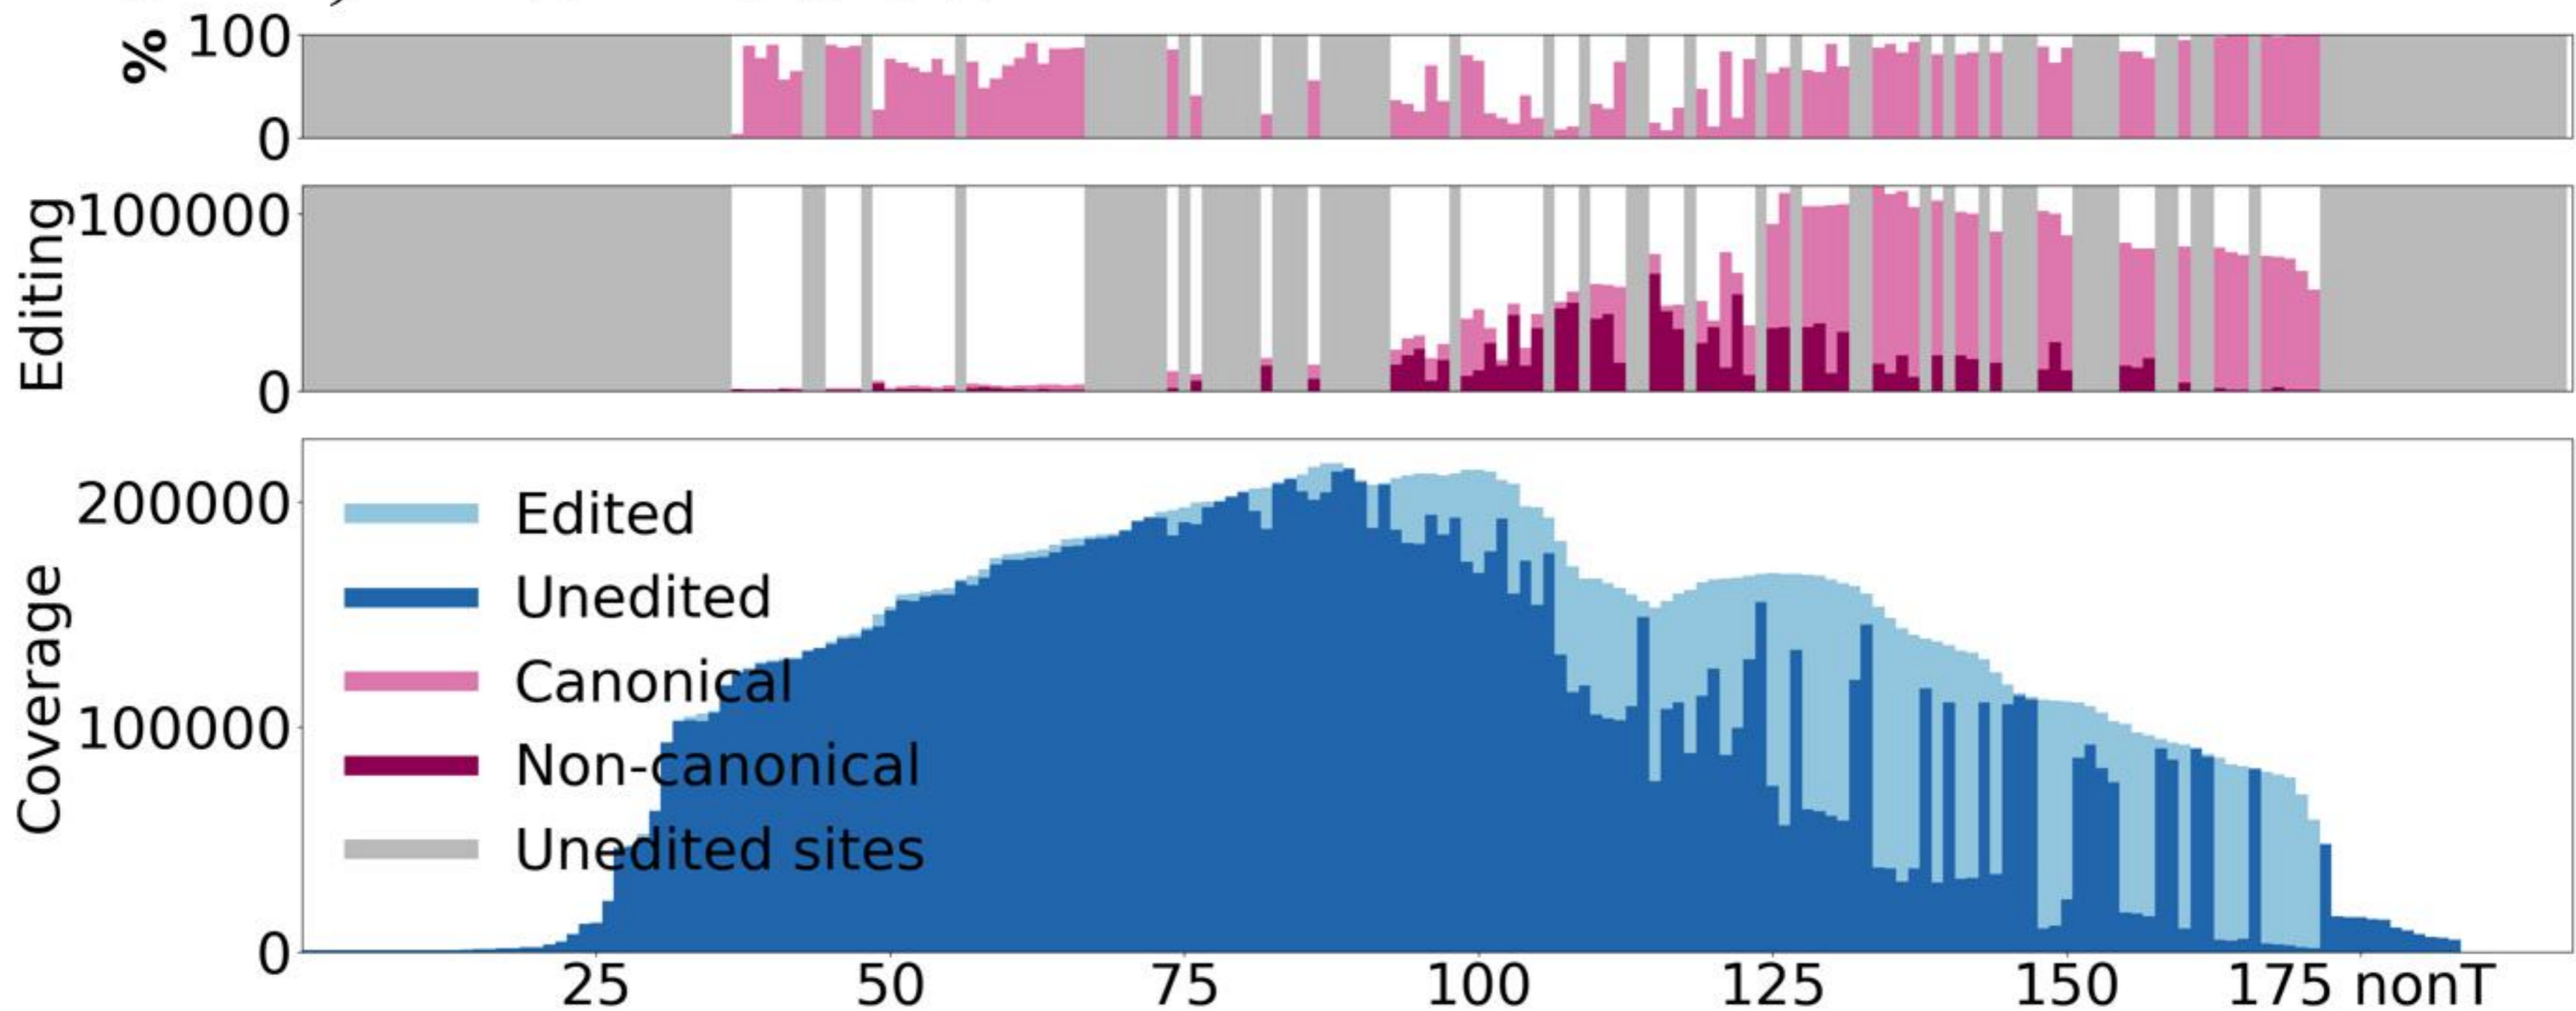

# CLB, RPS12 : slow

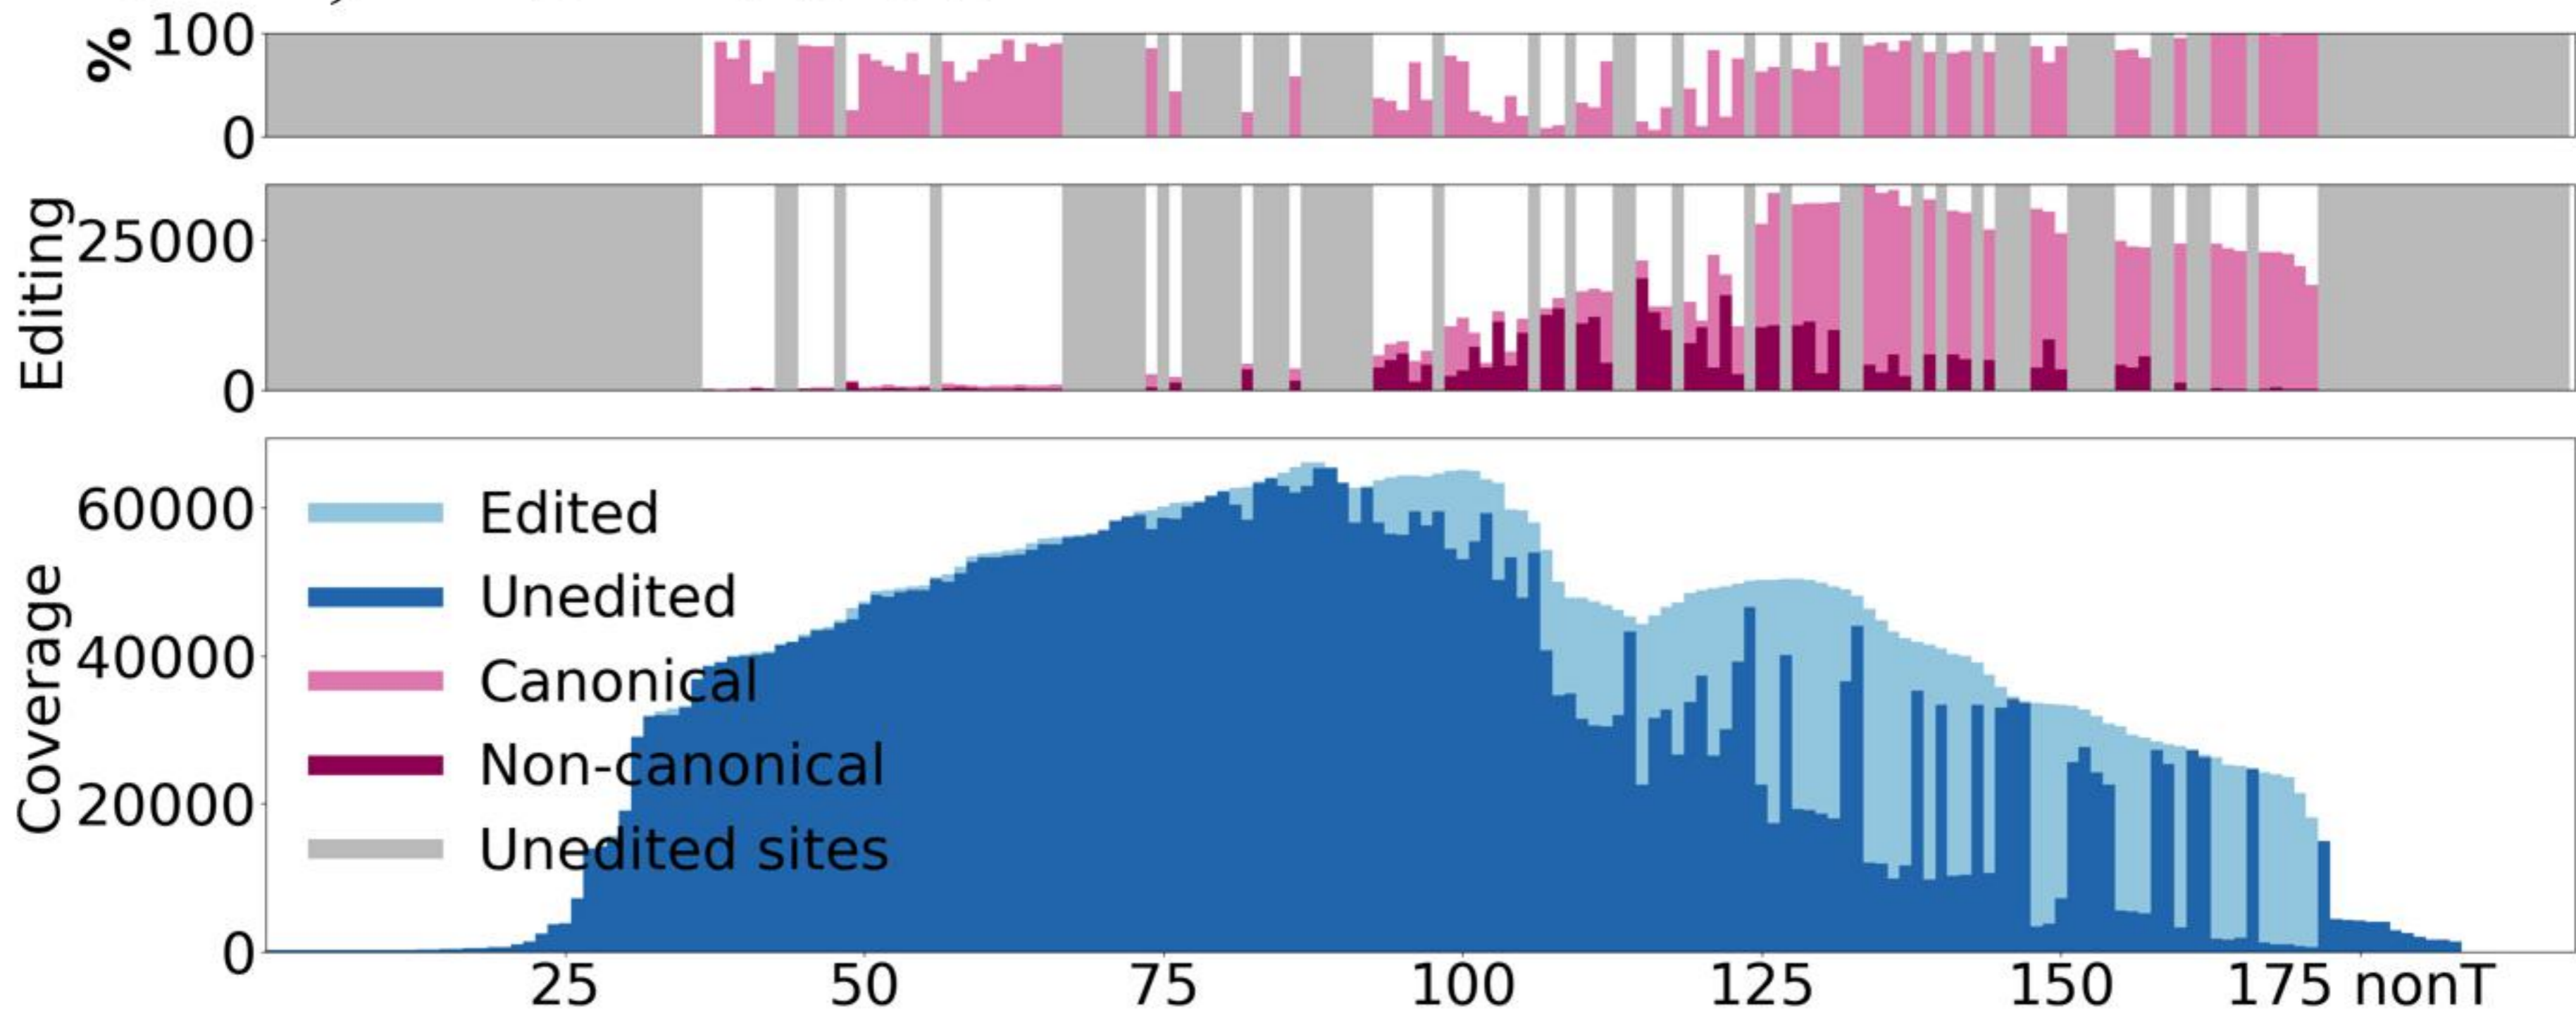

# CLB, RPS12 : mito

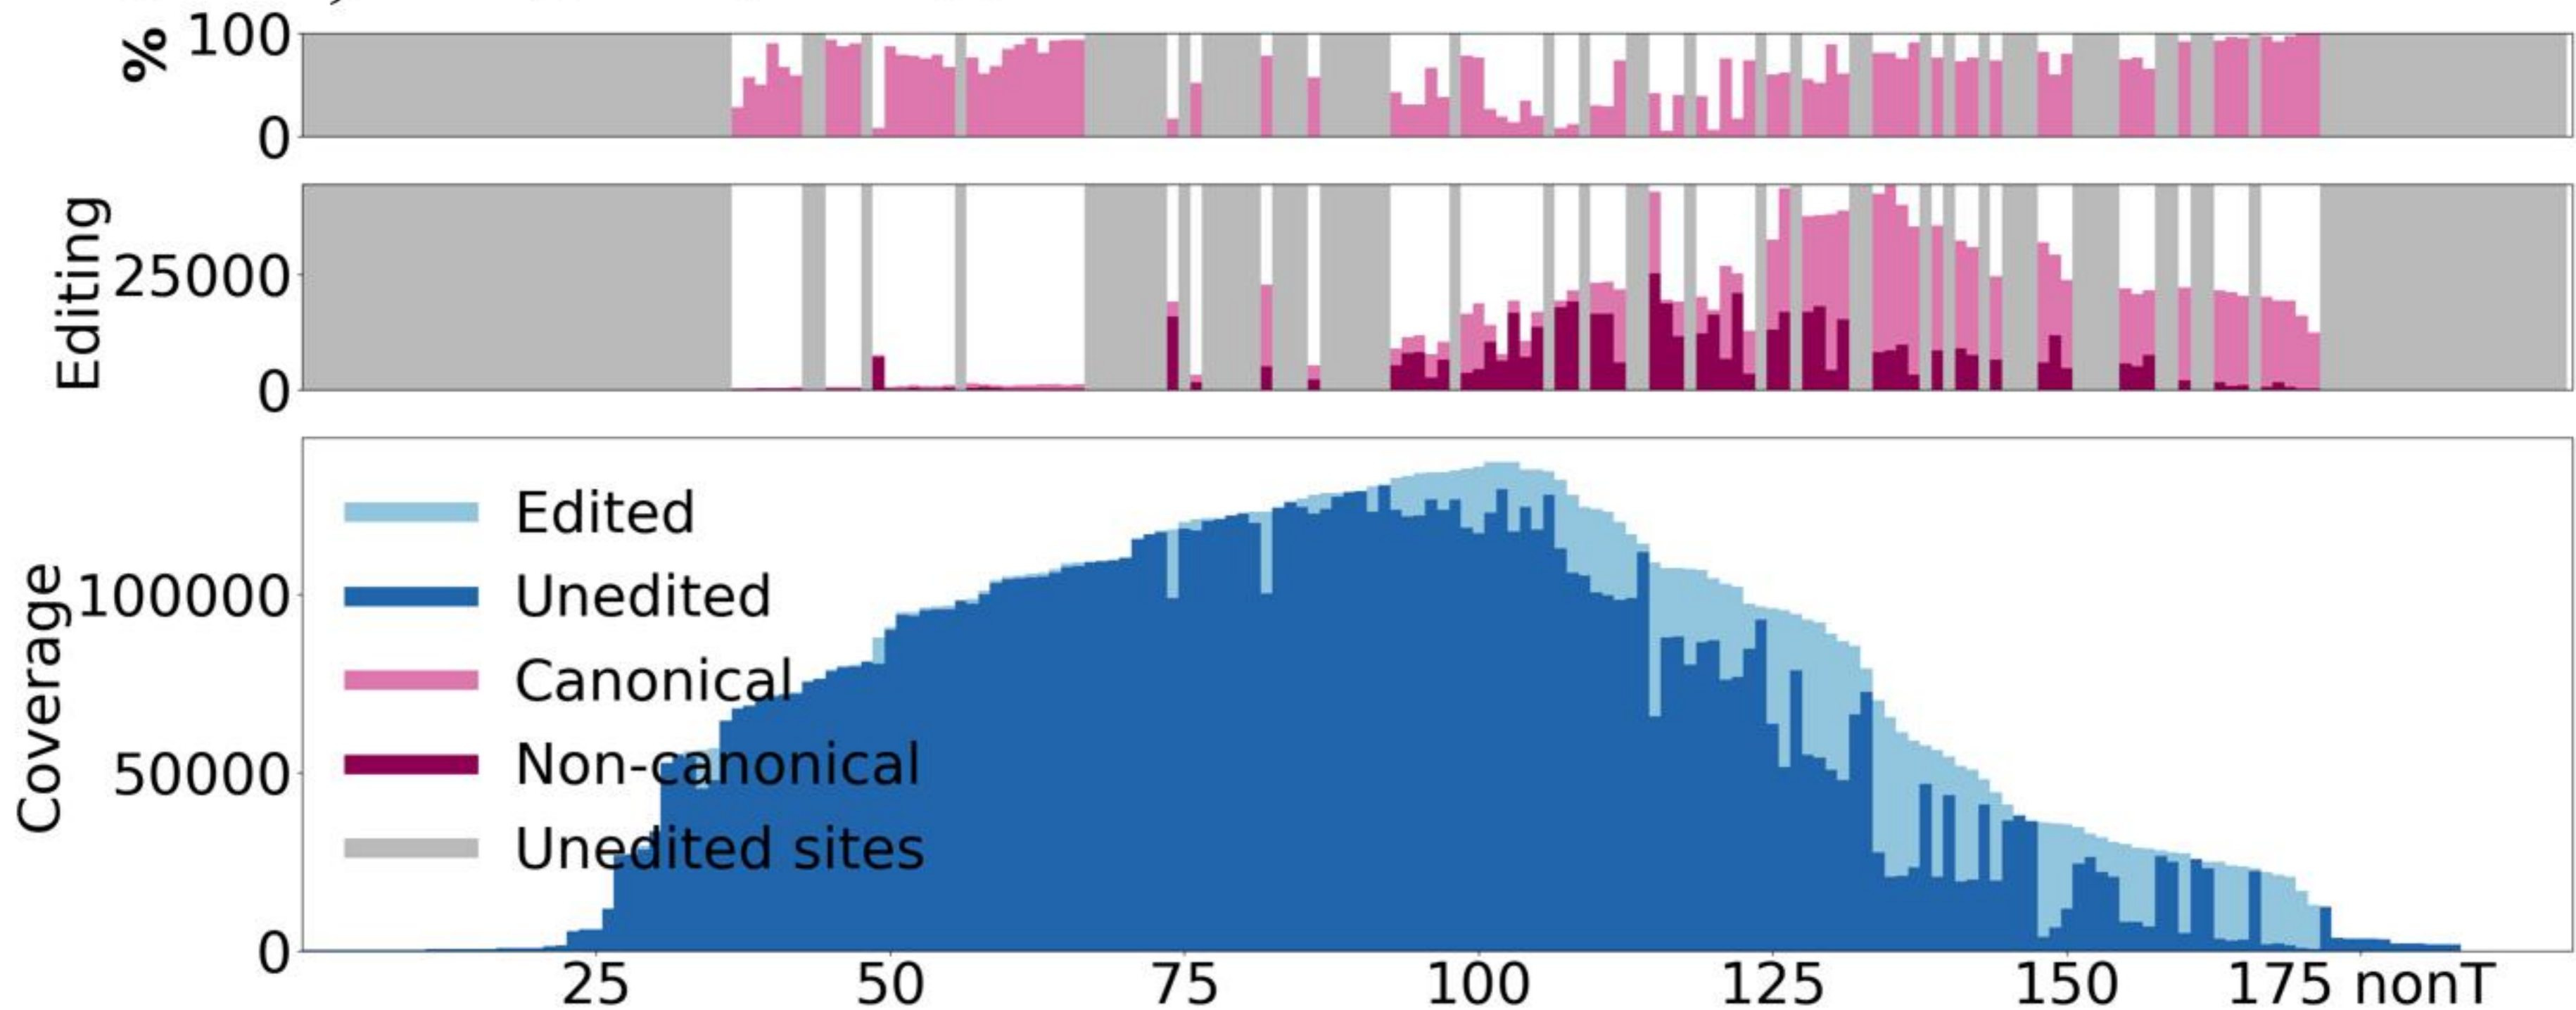

# CLB, RPS12 : mito

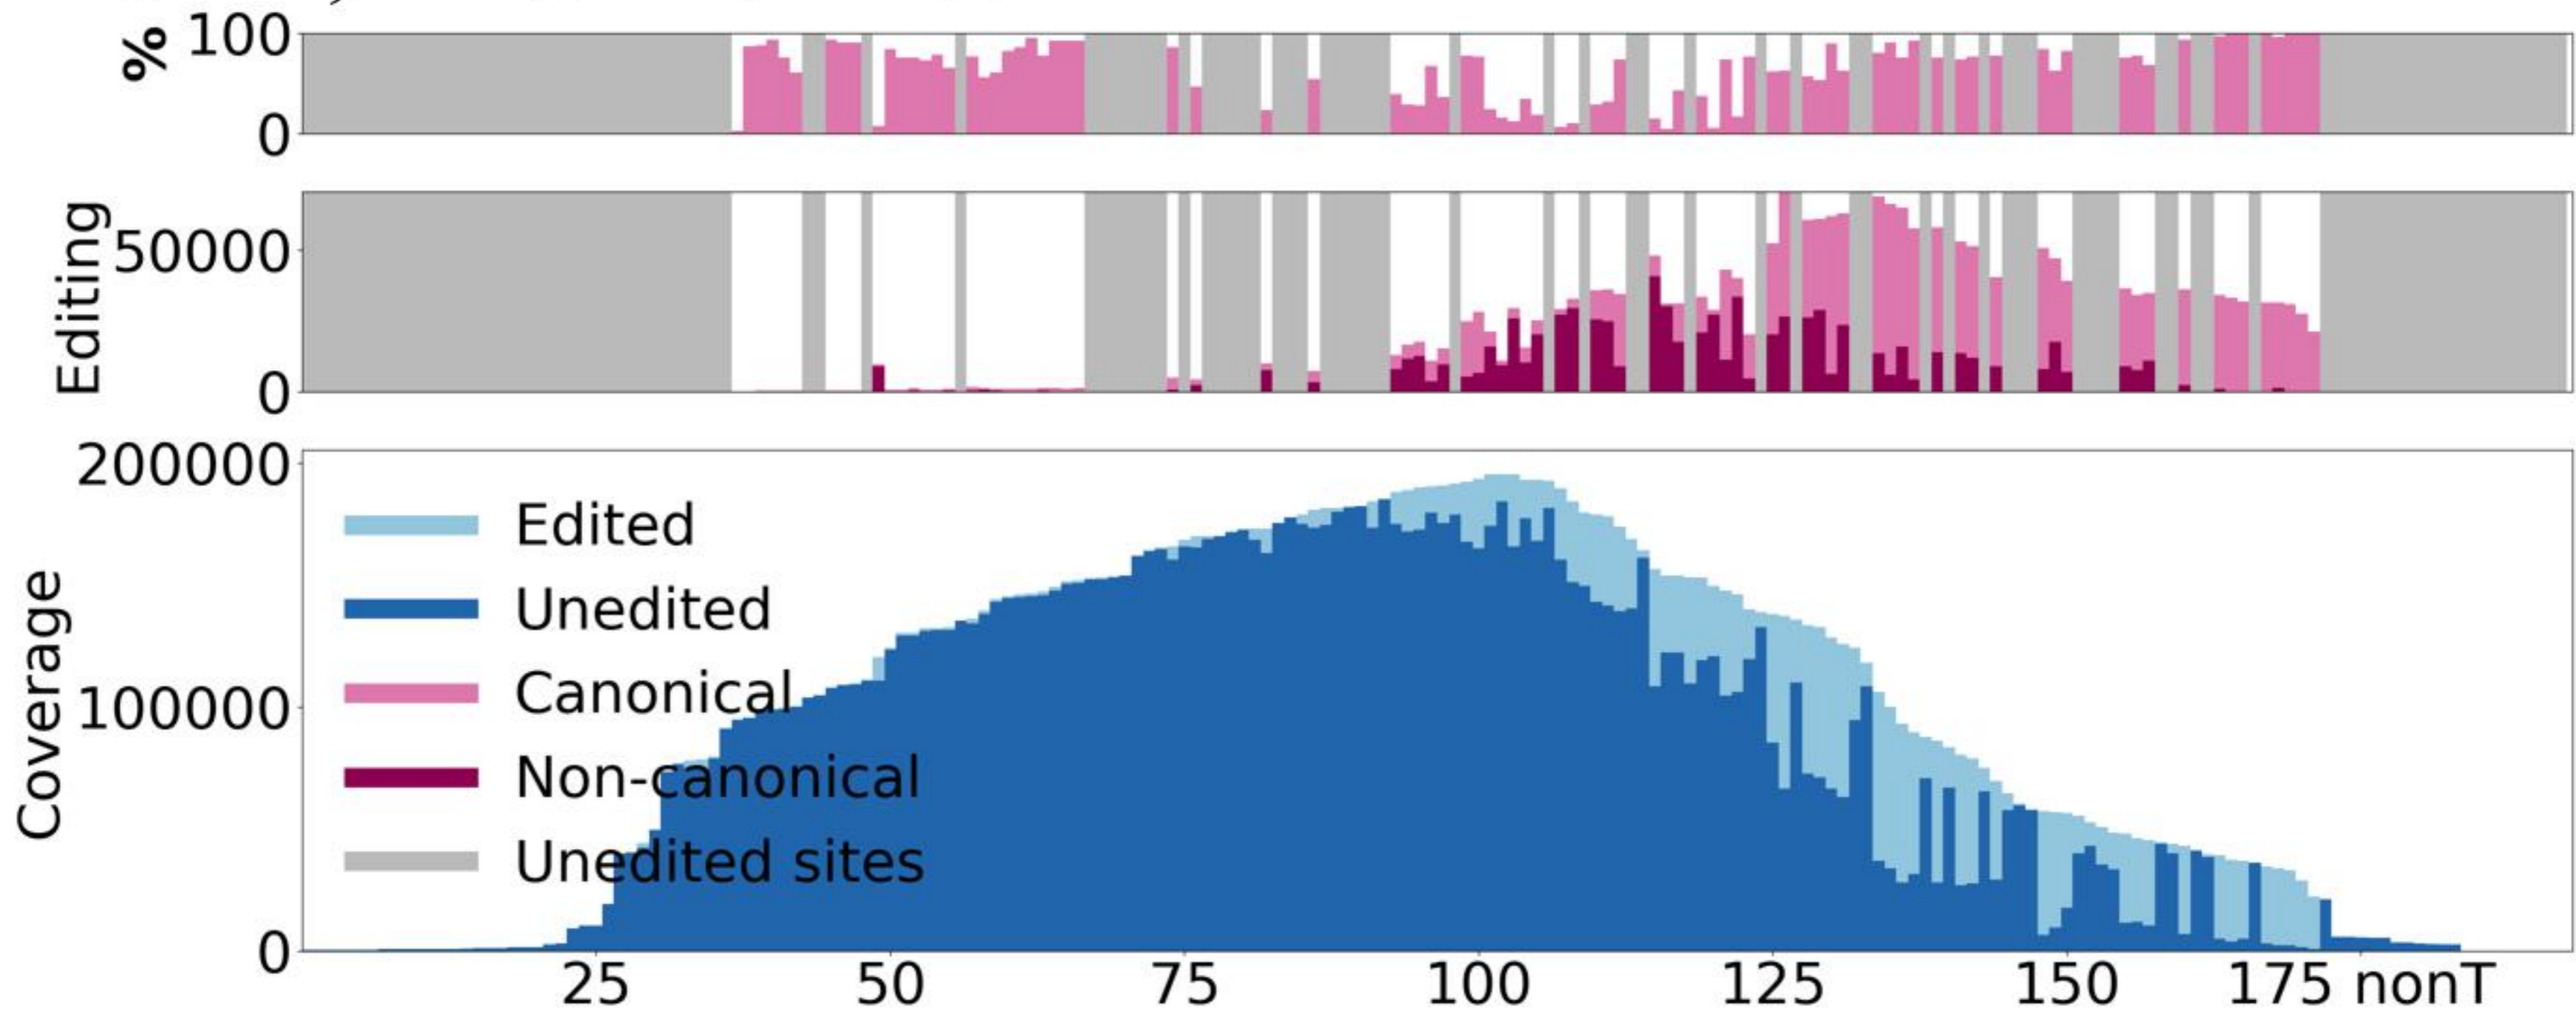

# CLB, RPS12 : total

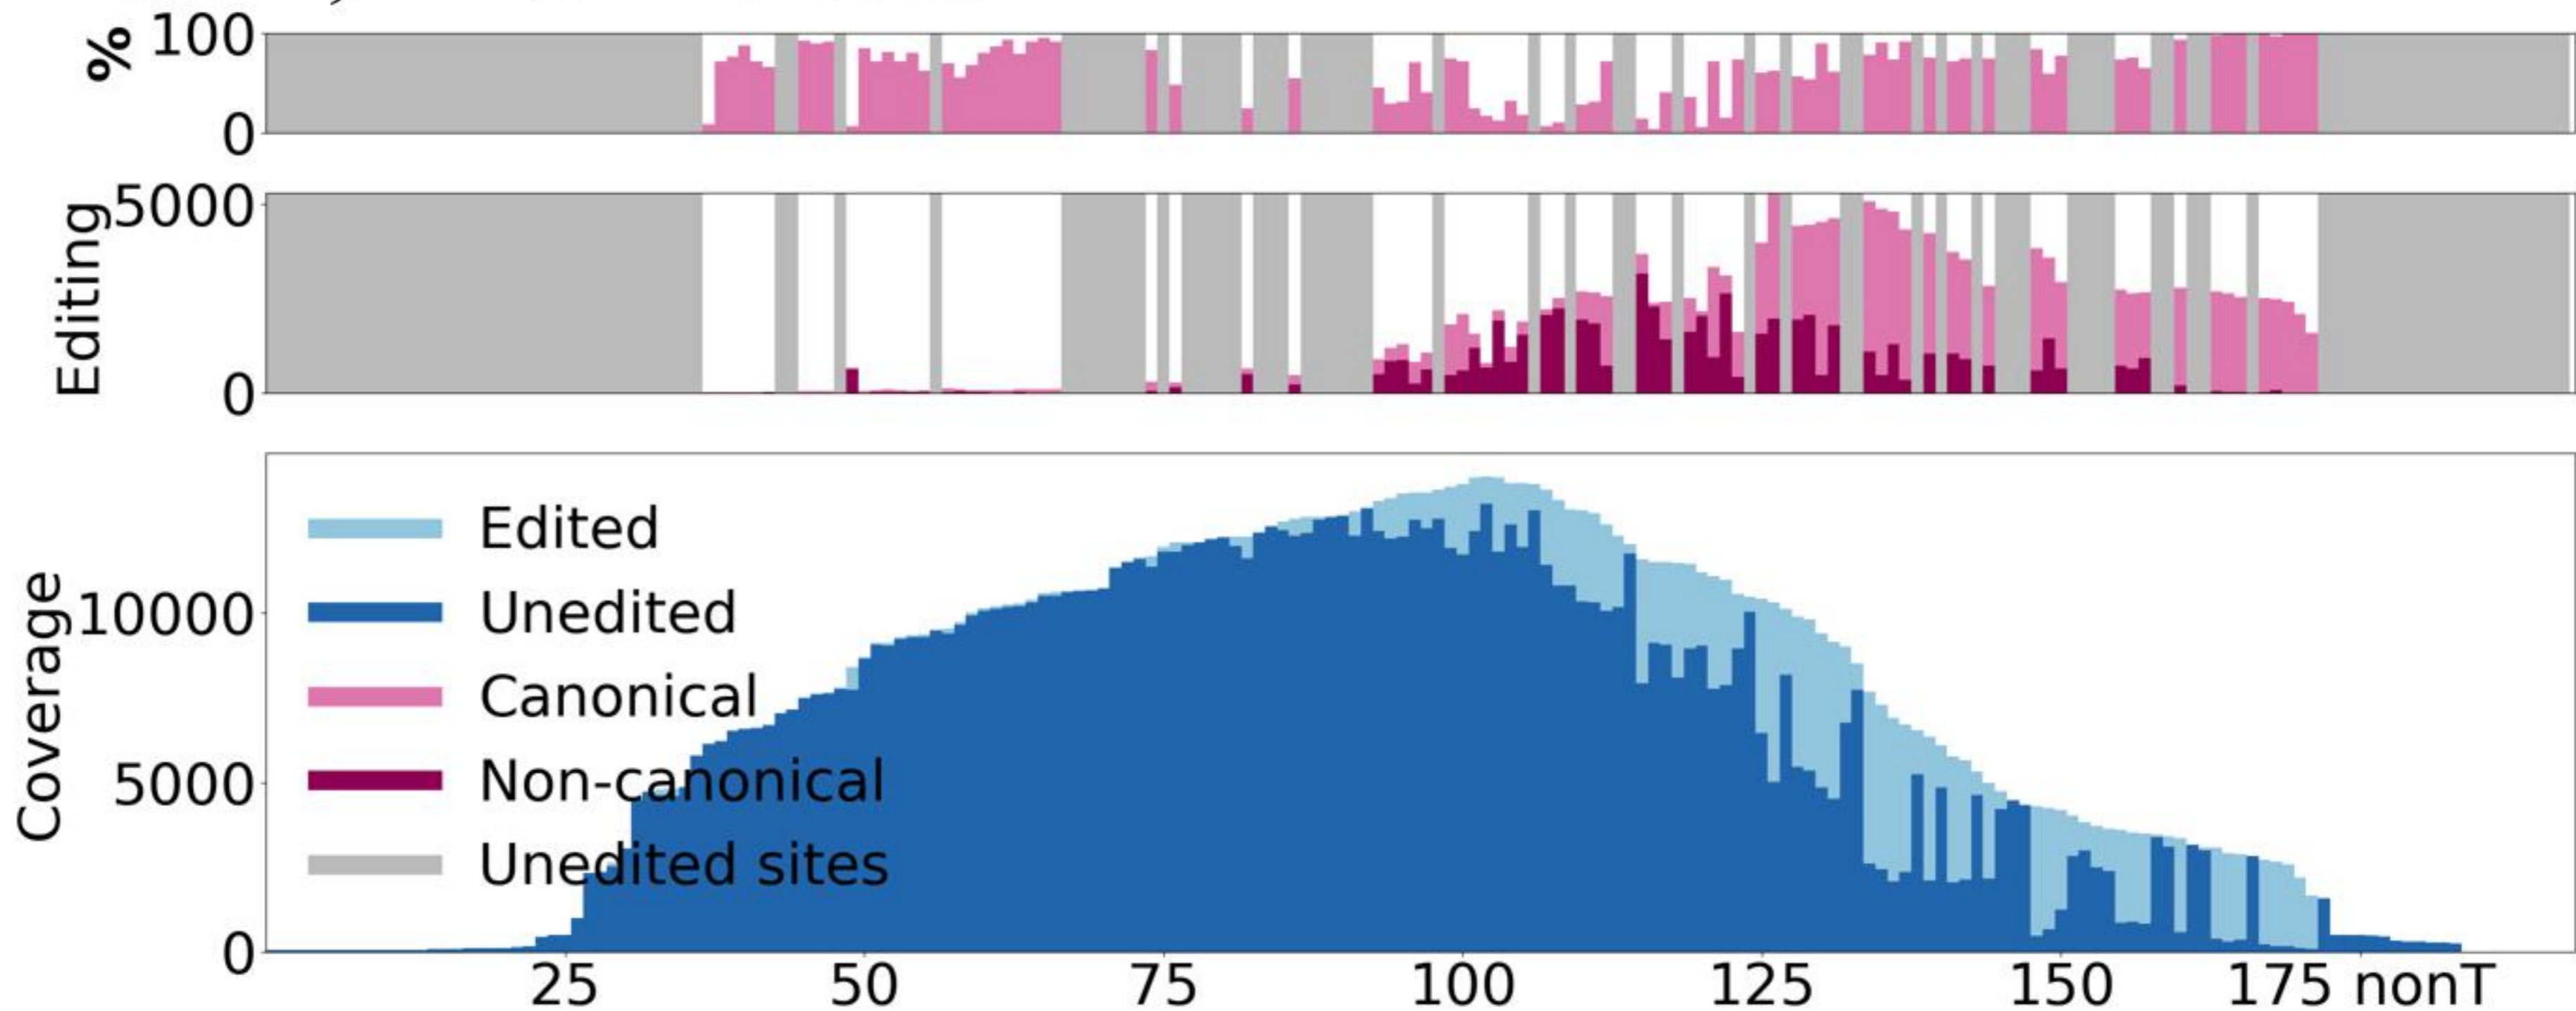

# CLB, RPS12 : total

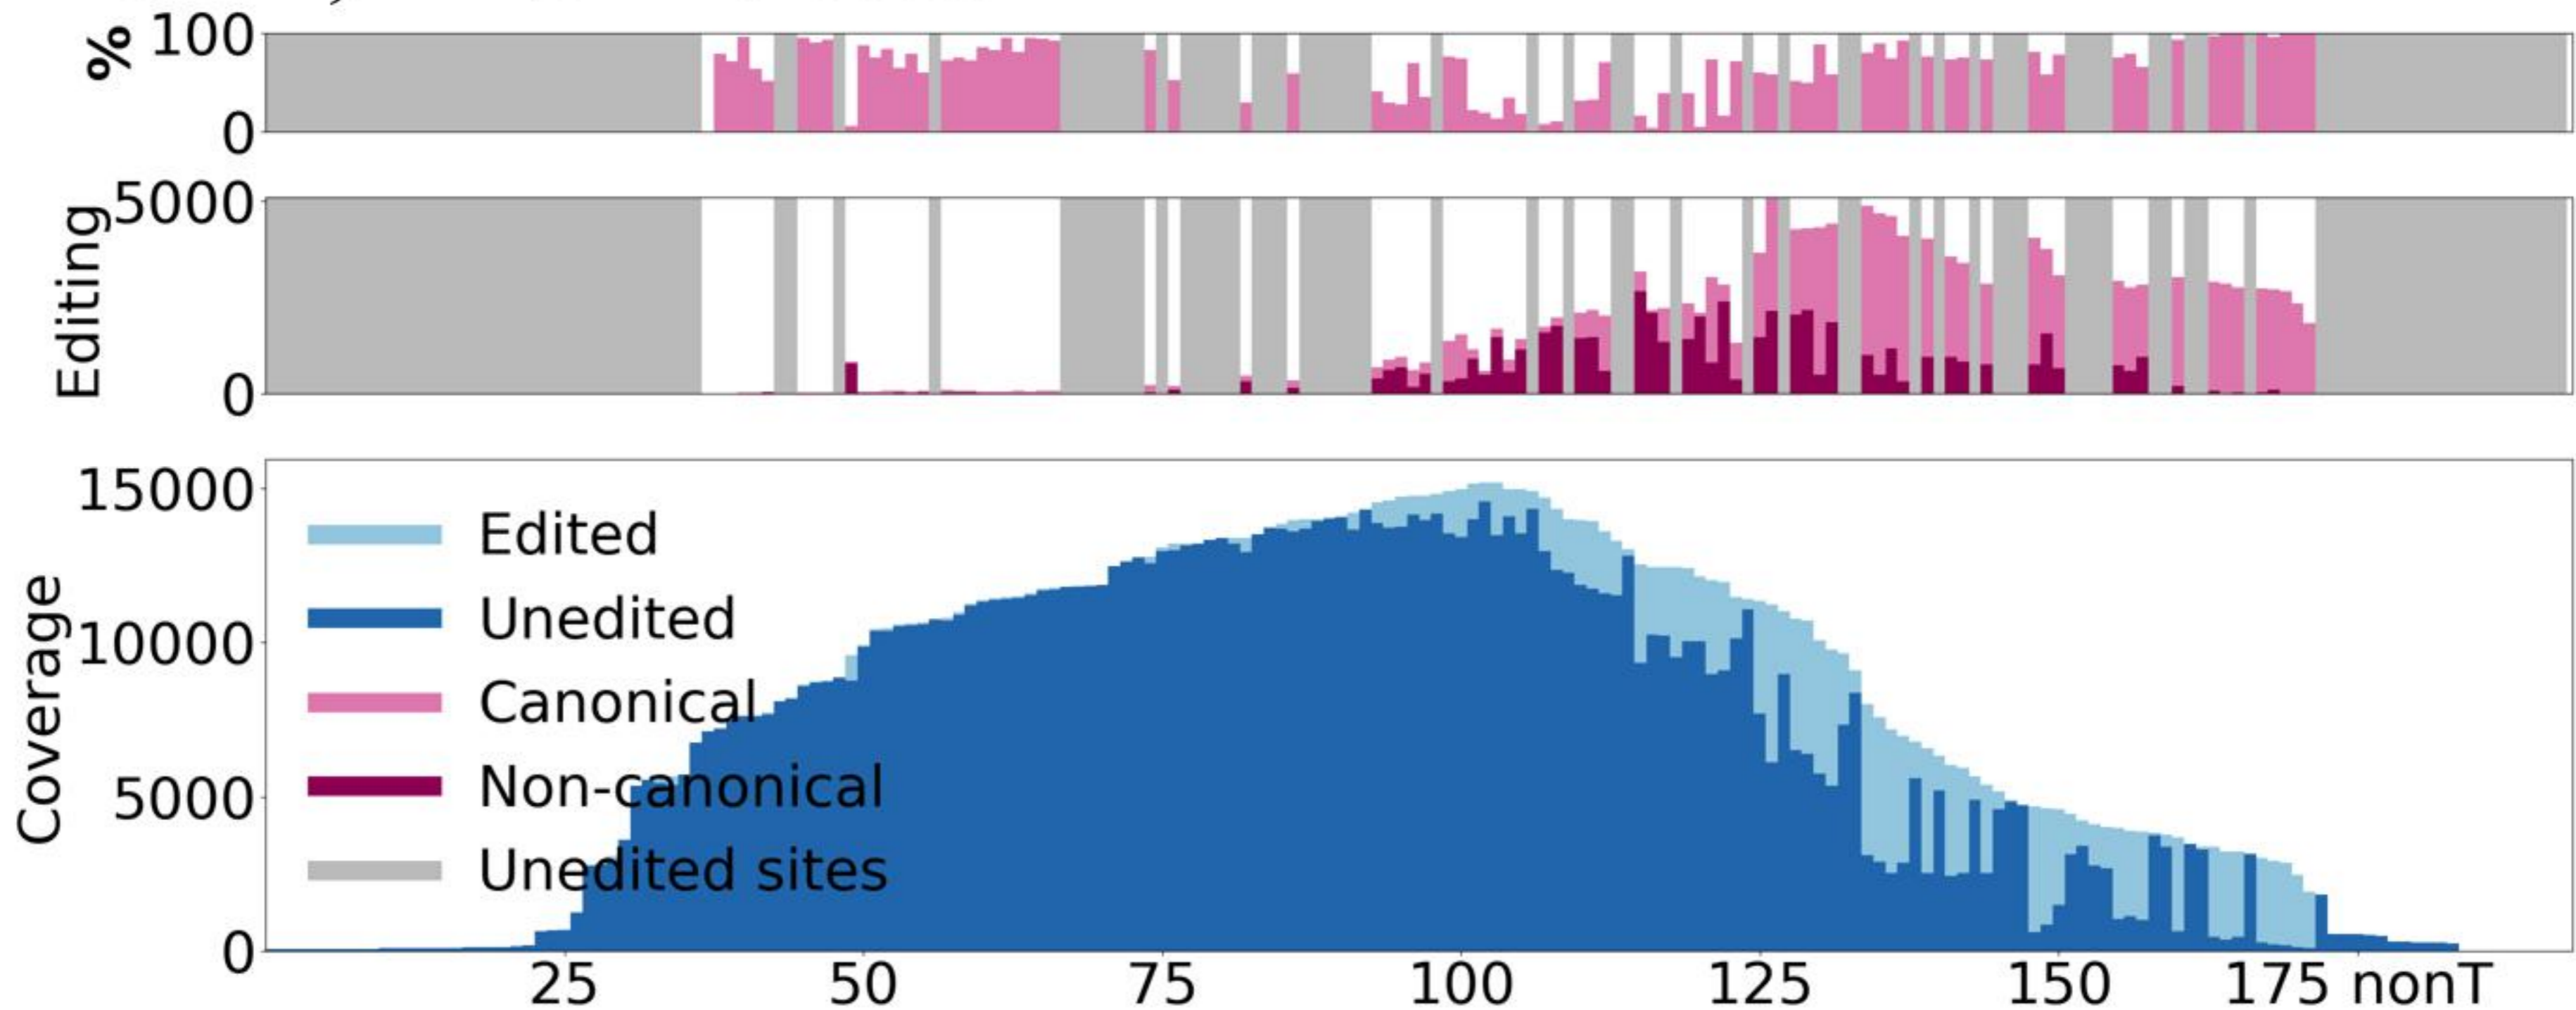

# ESM, CO3 : mito

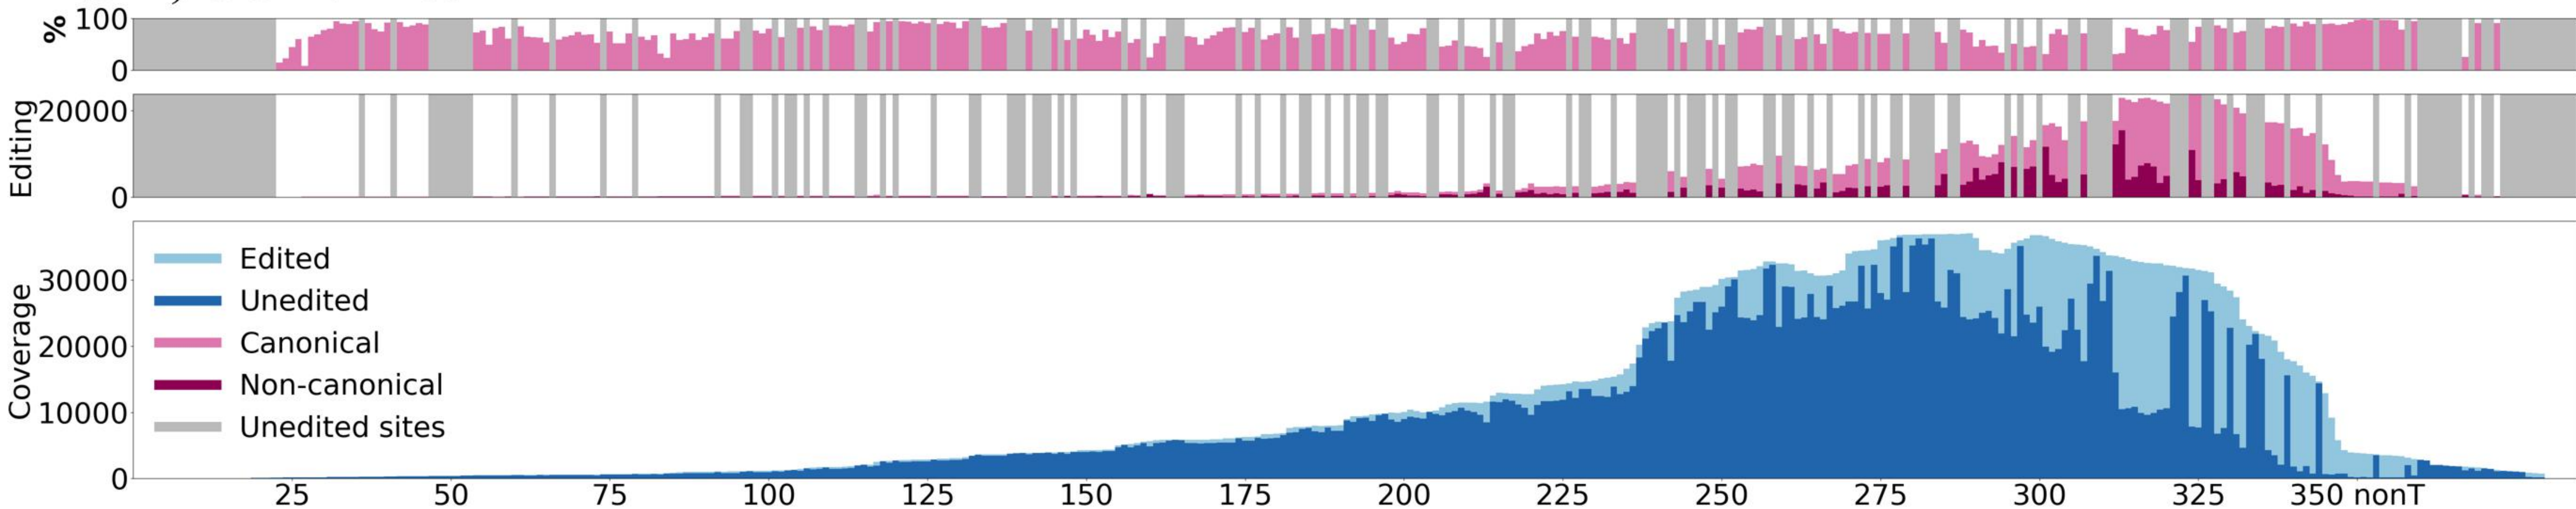

# ESM, CO3 : mito

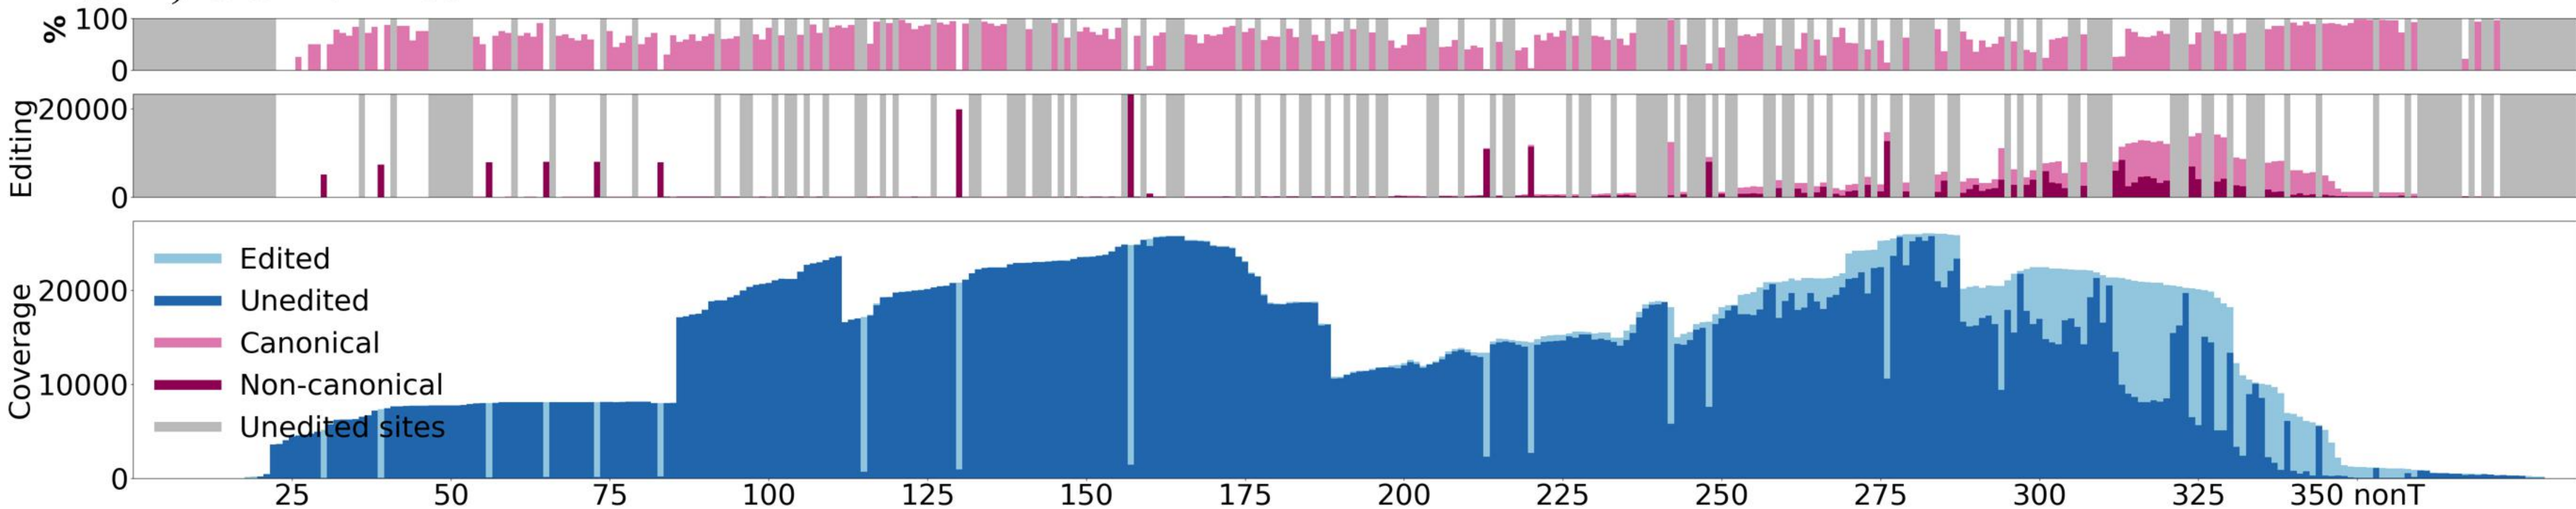

# ESM, CO3 : total

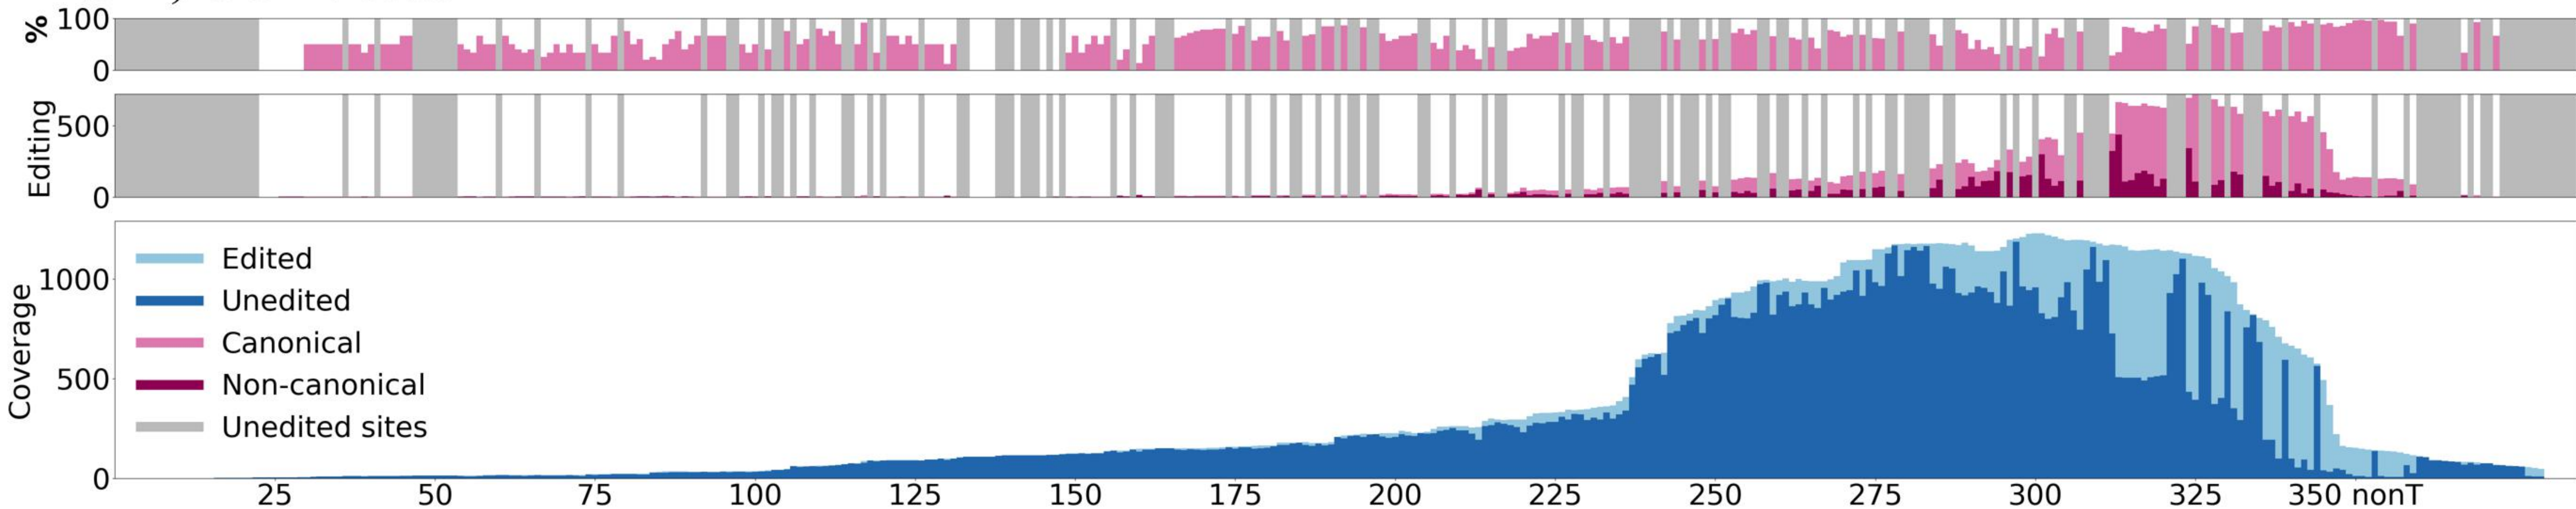

# ESM, CO3 : total

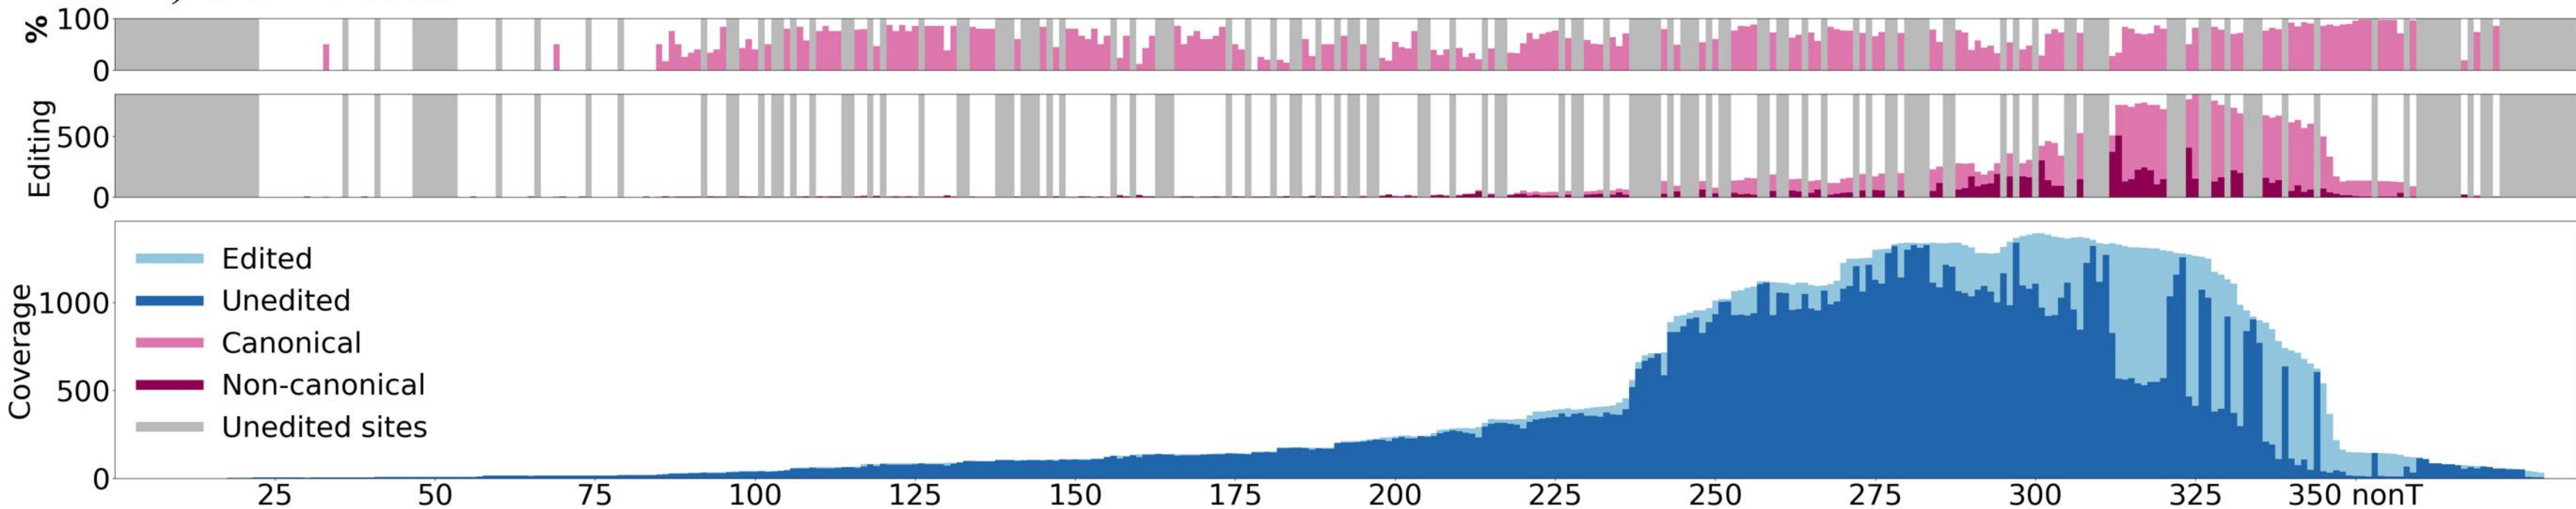

# ESM, RPS12 : mito

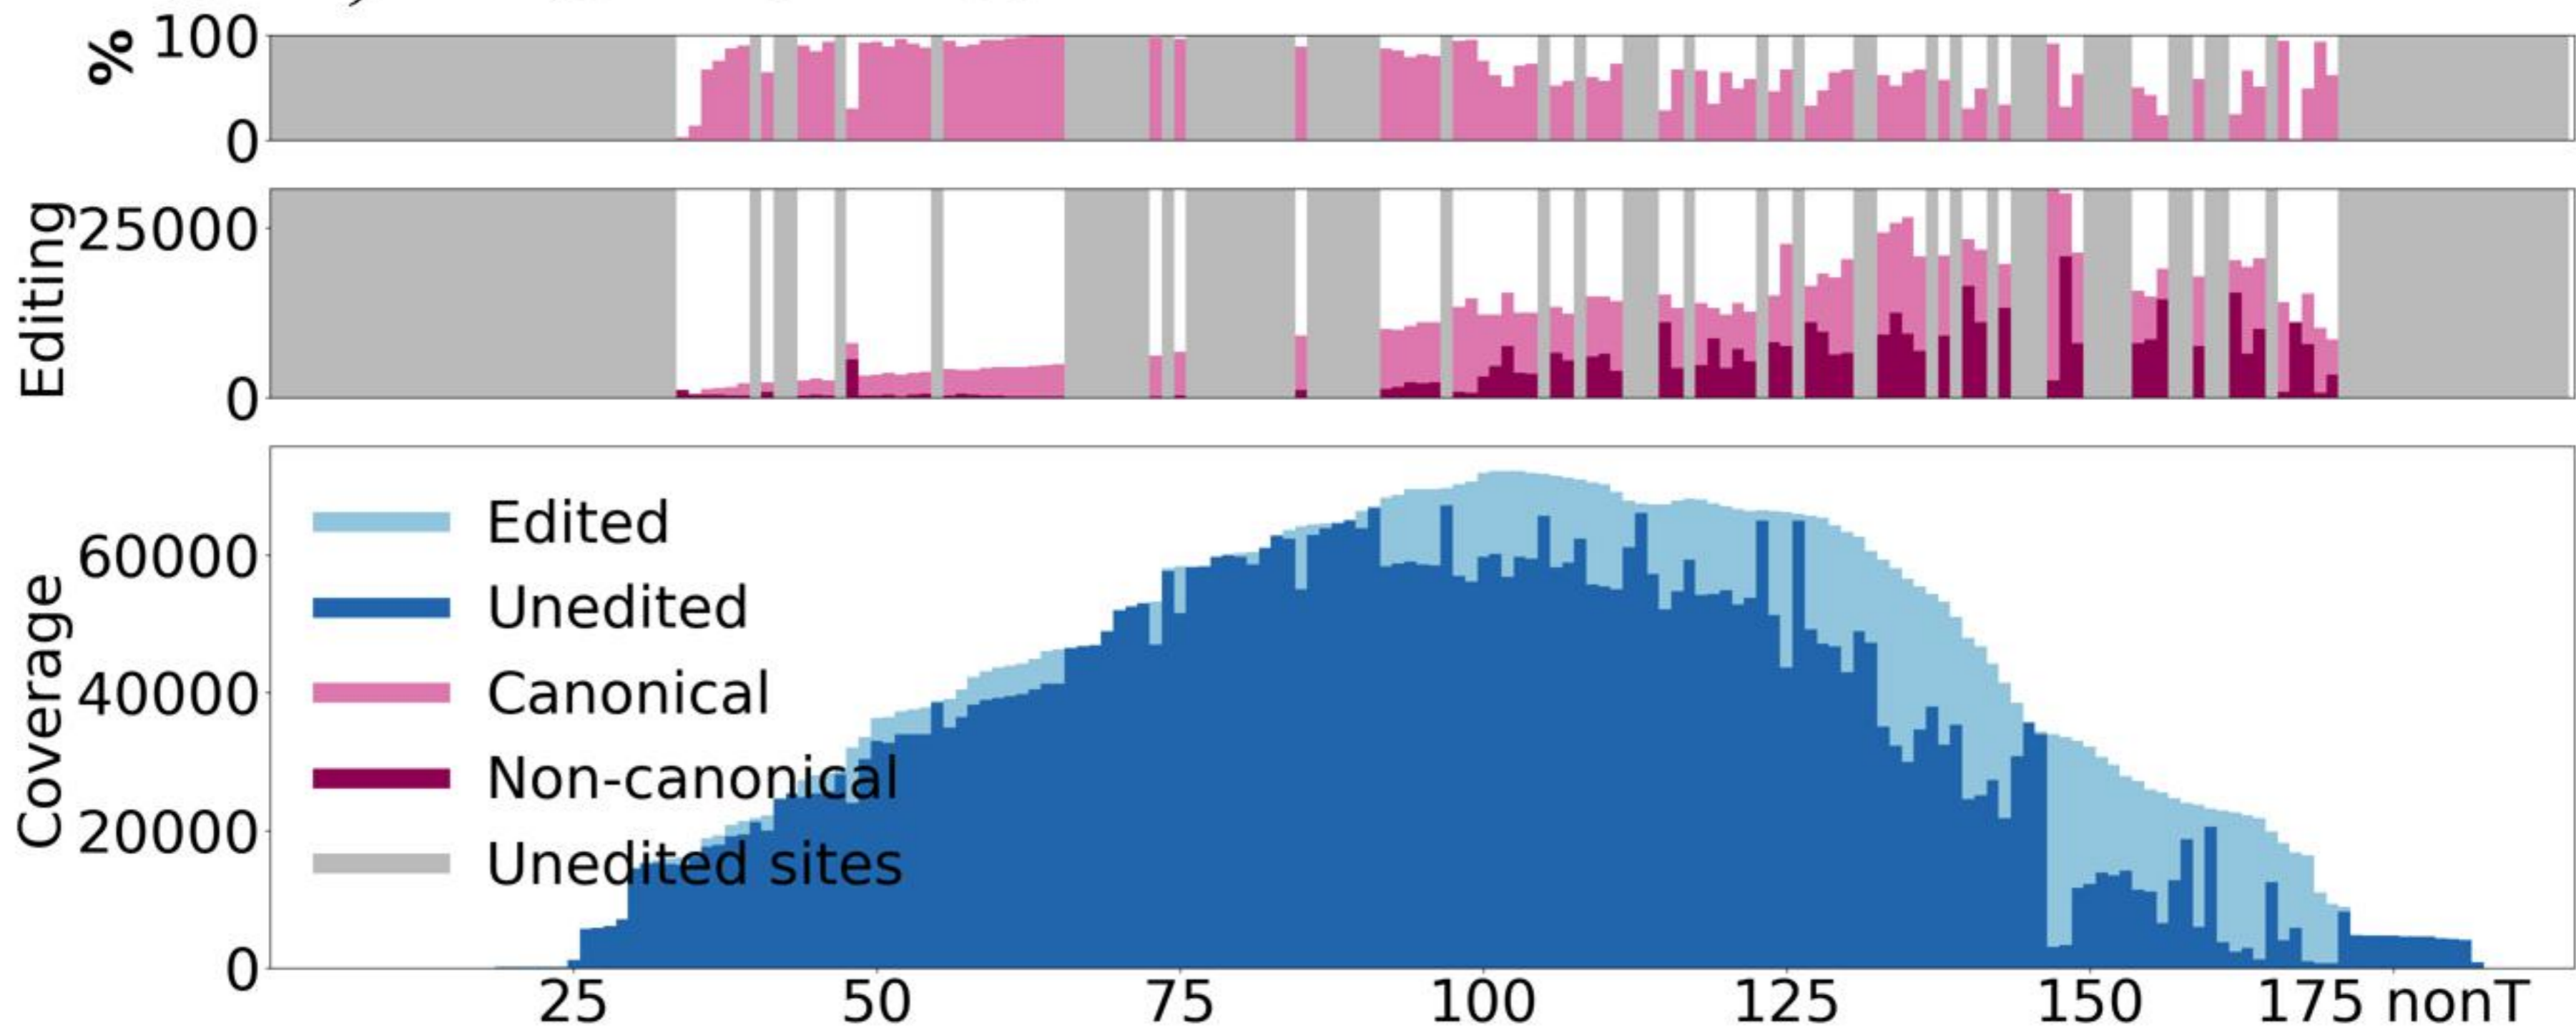

# ESM, RPS12 : mito

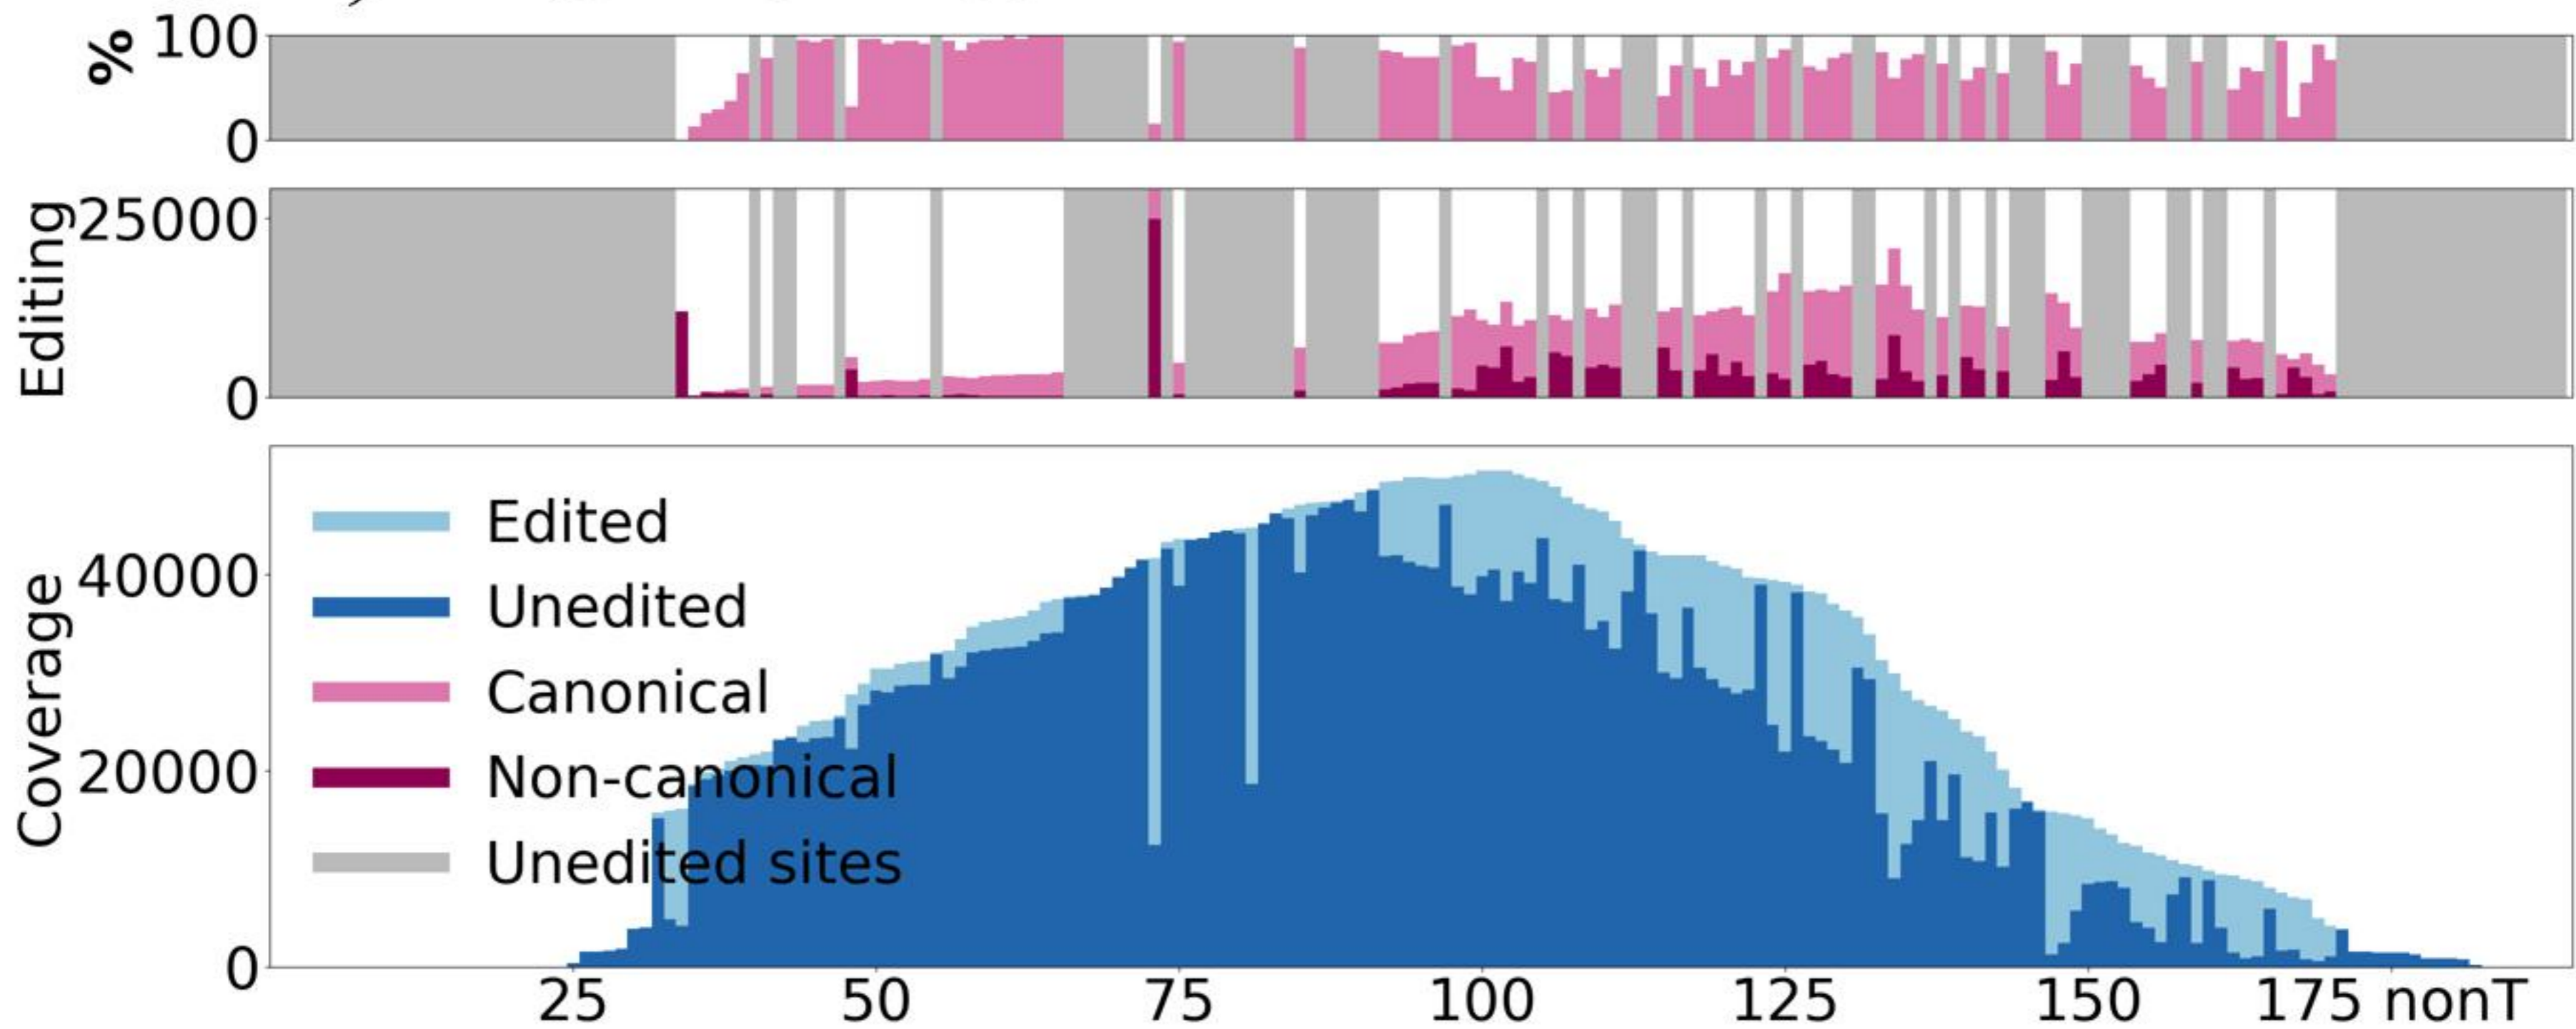

# ESM, RPS12 : total

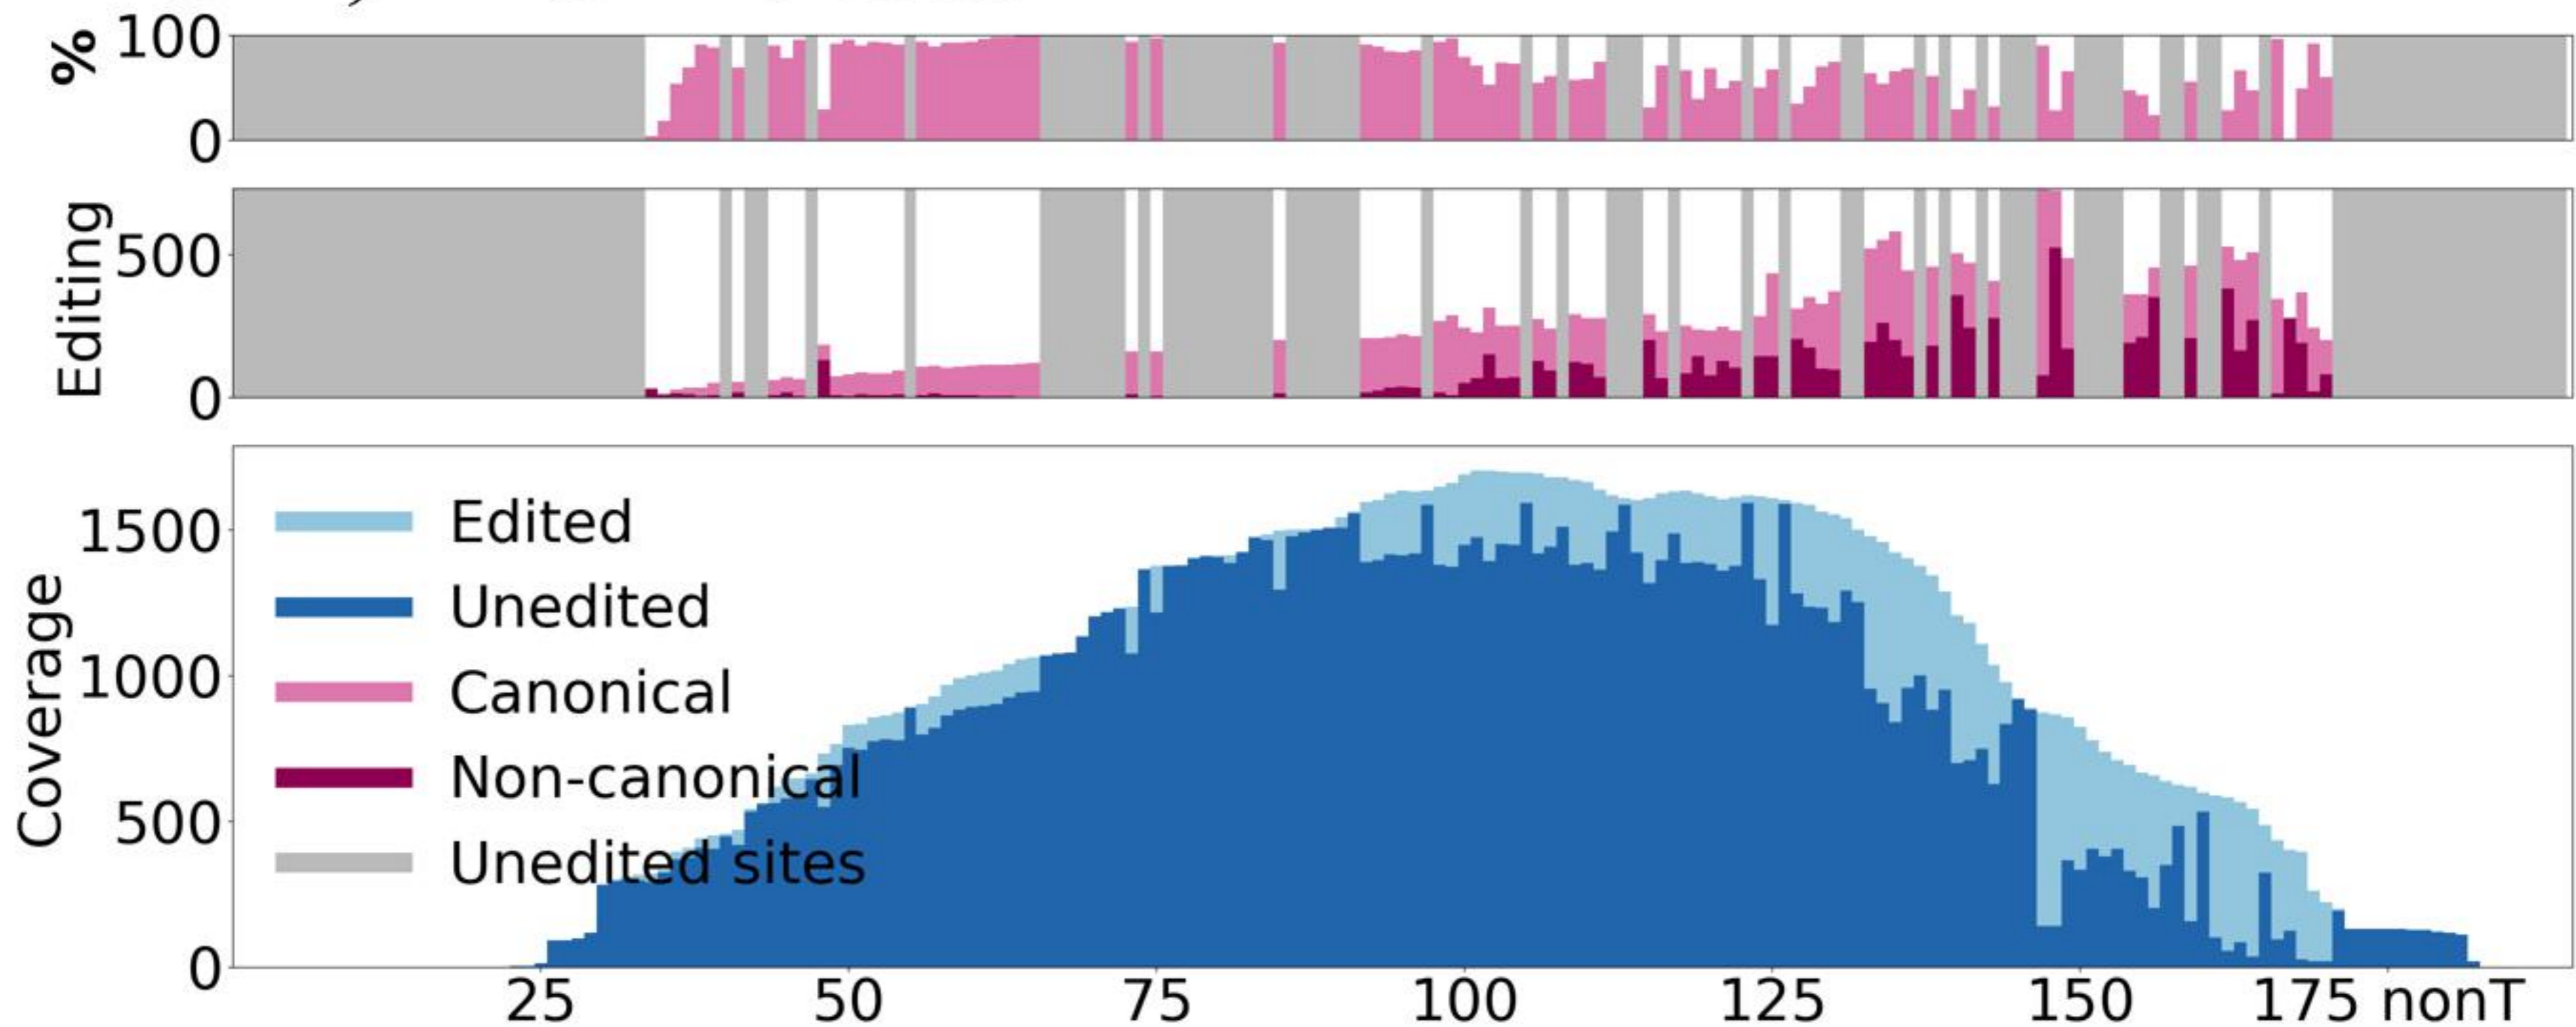

# ESM, RPS12 : total

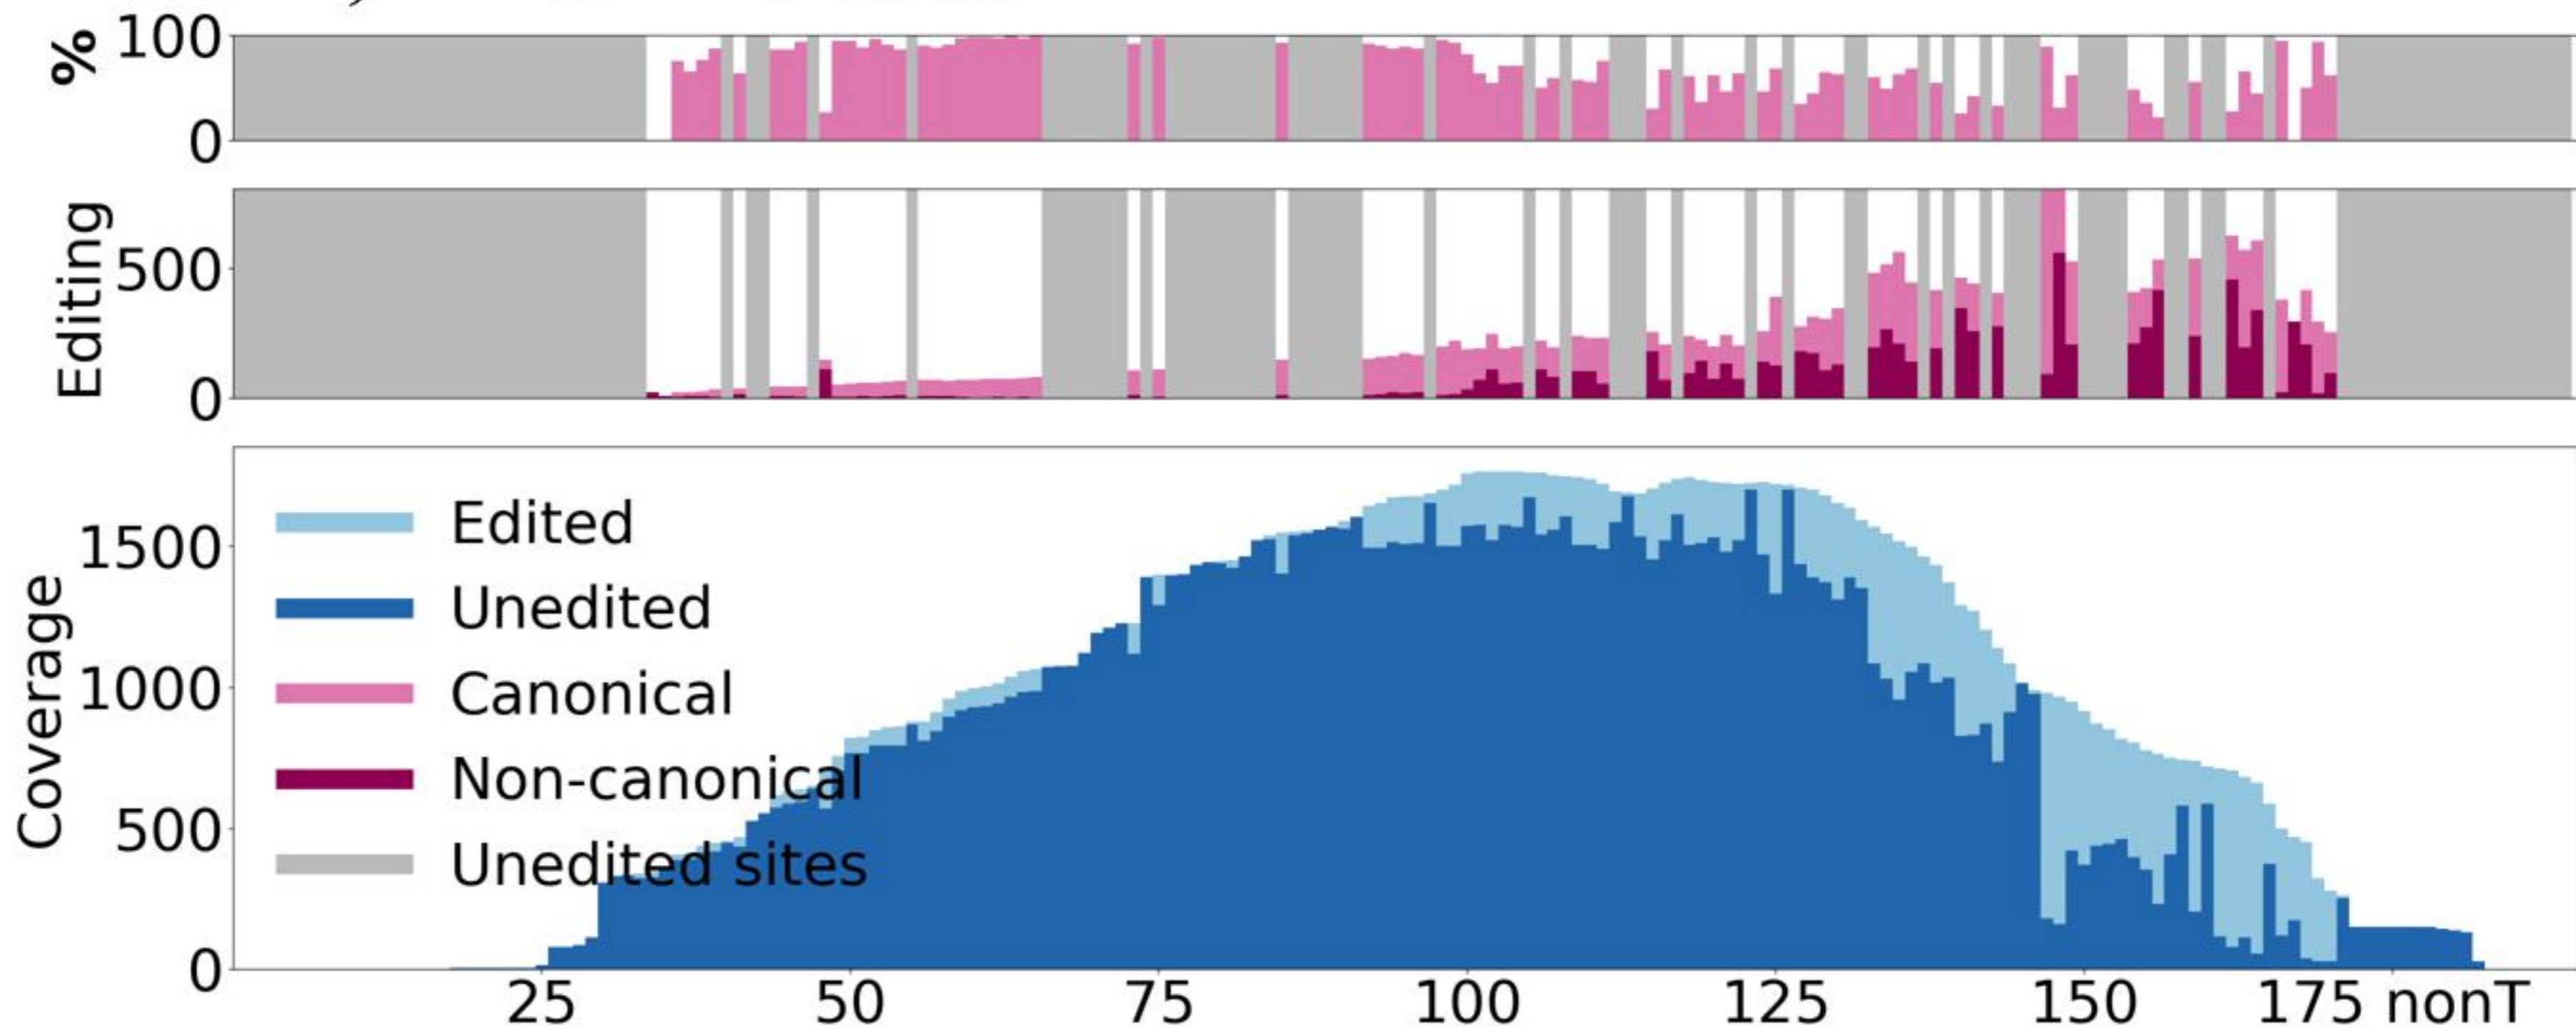

# SYL, A6 : fed

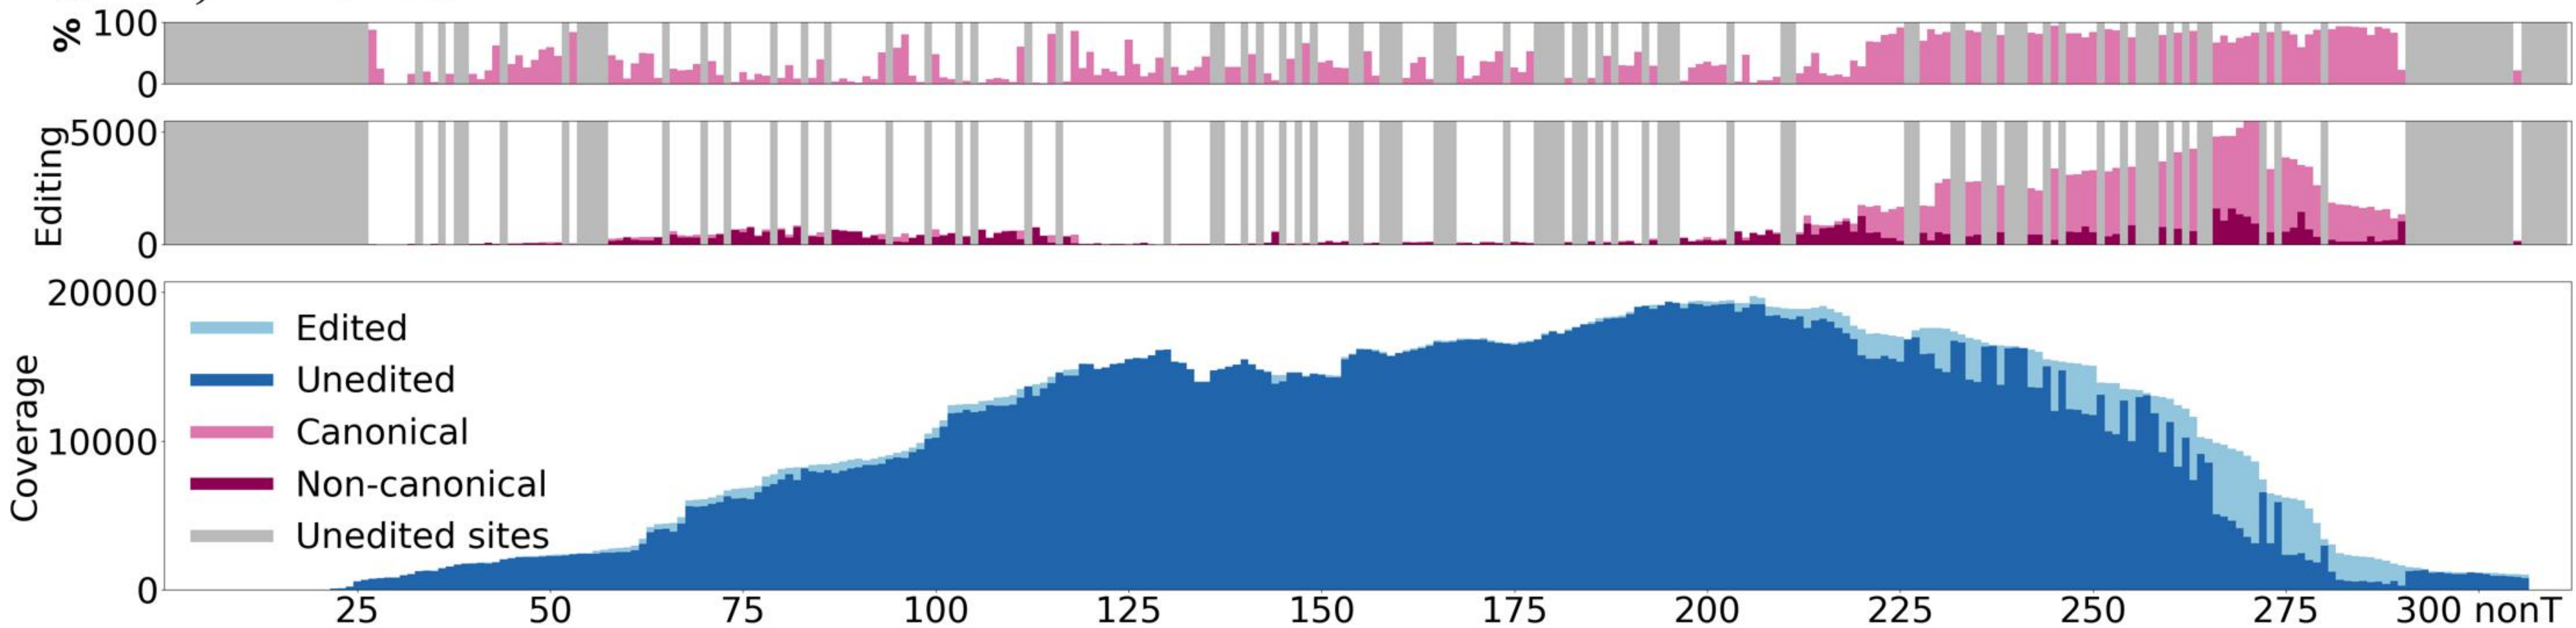

# SYL, A6 : fed

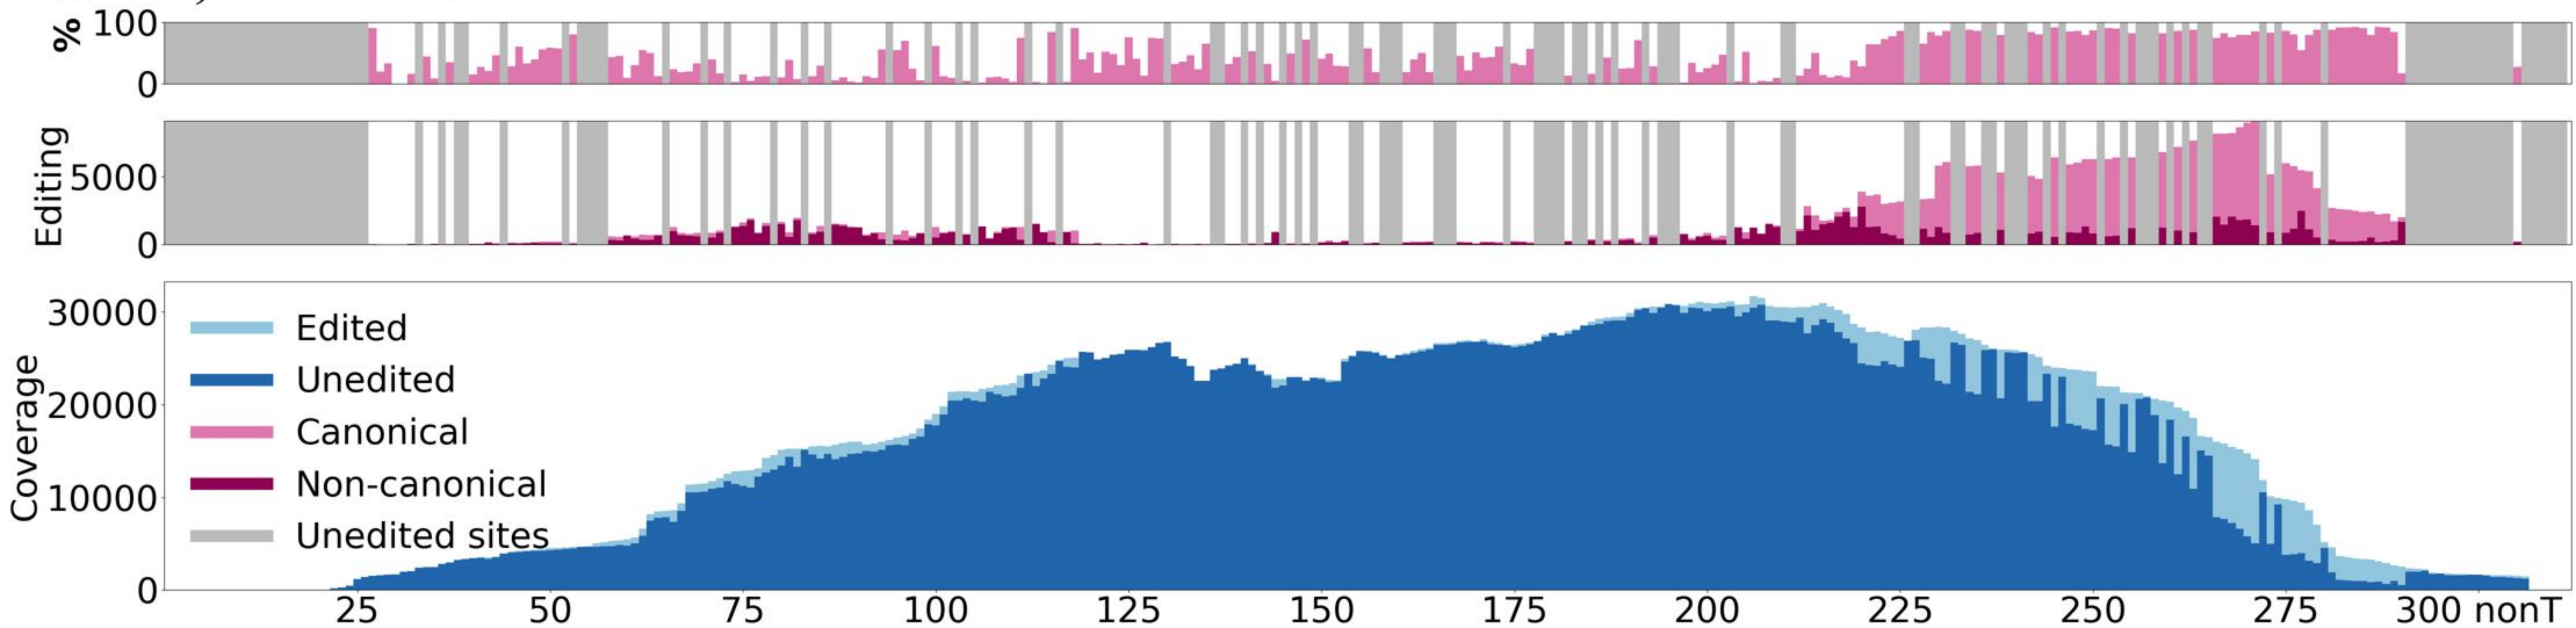

# SYL, A6 : abrupt

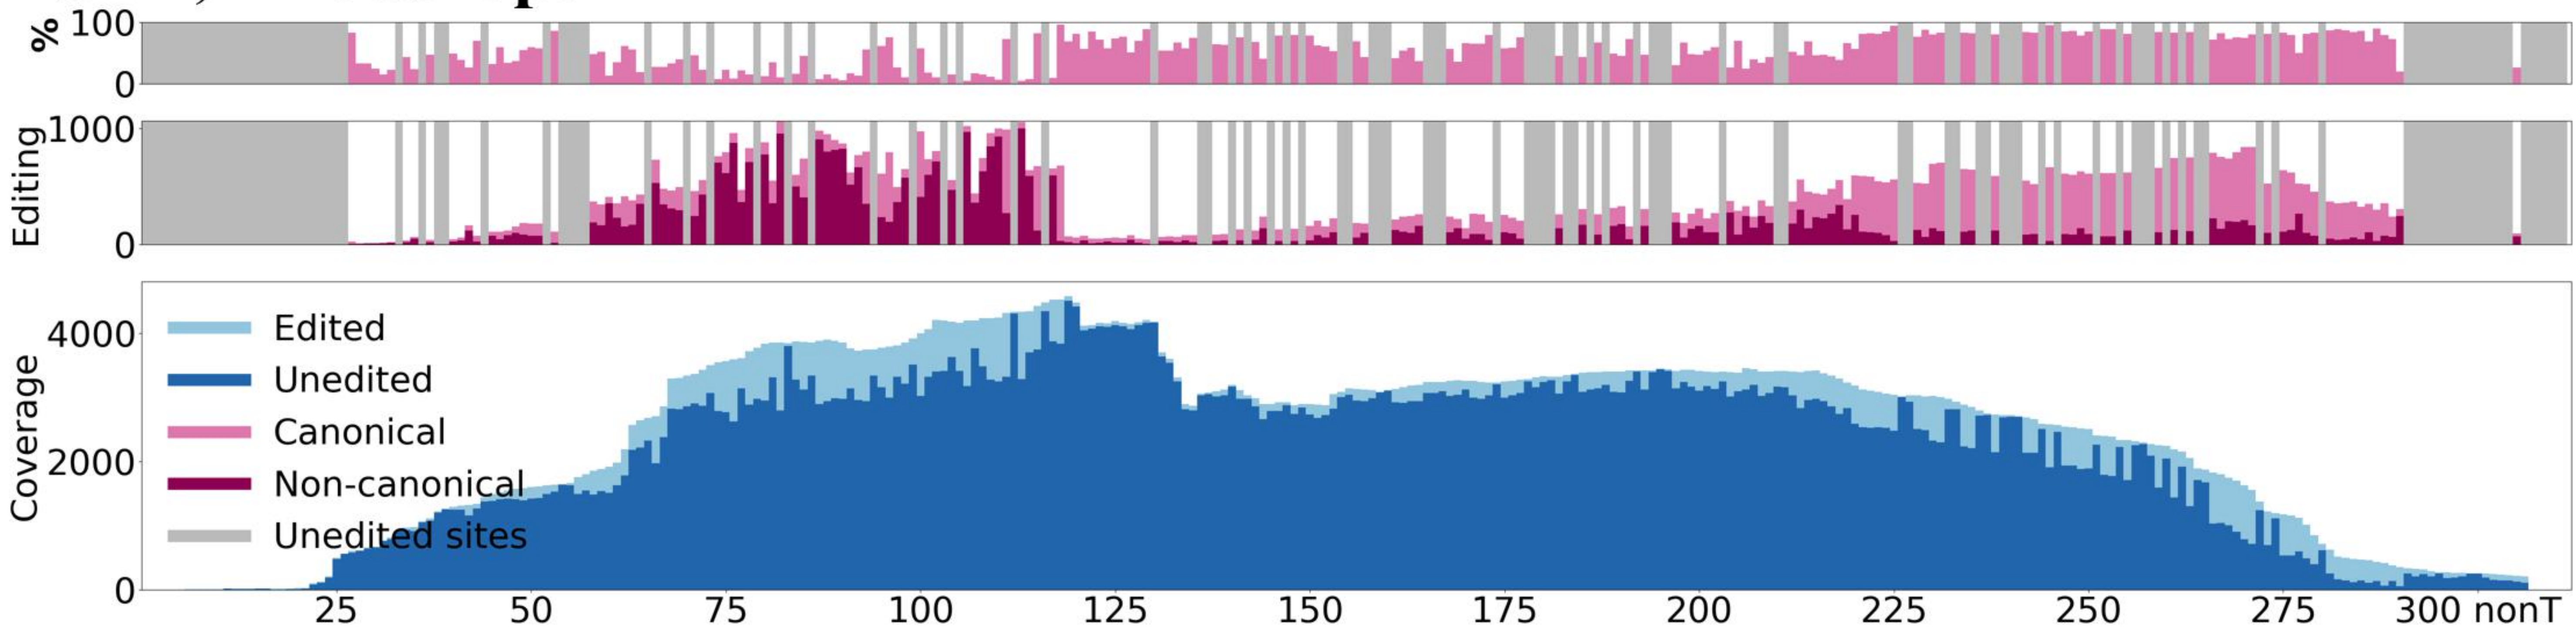

# SYL, A6 : abrupt

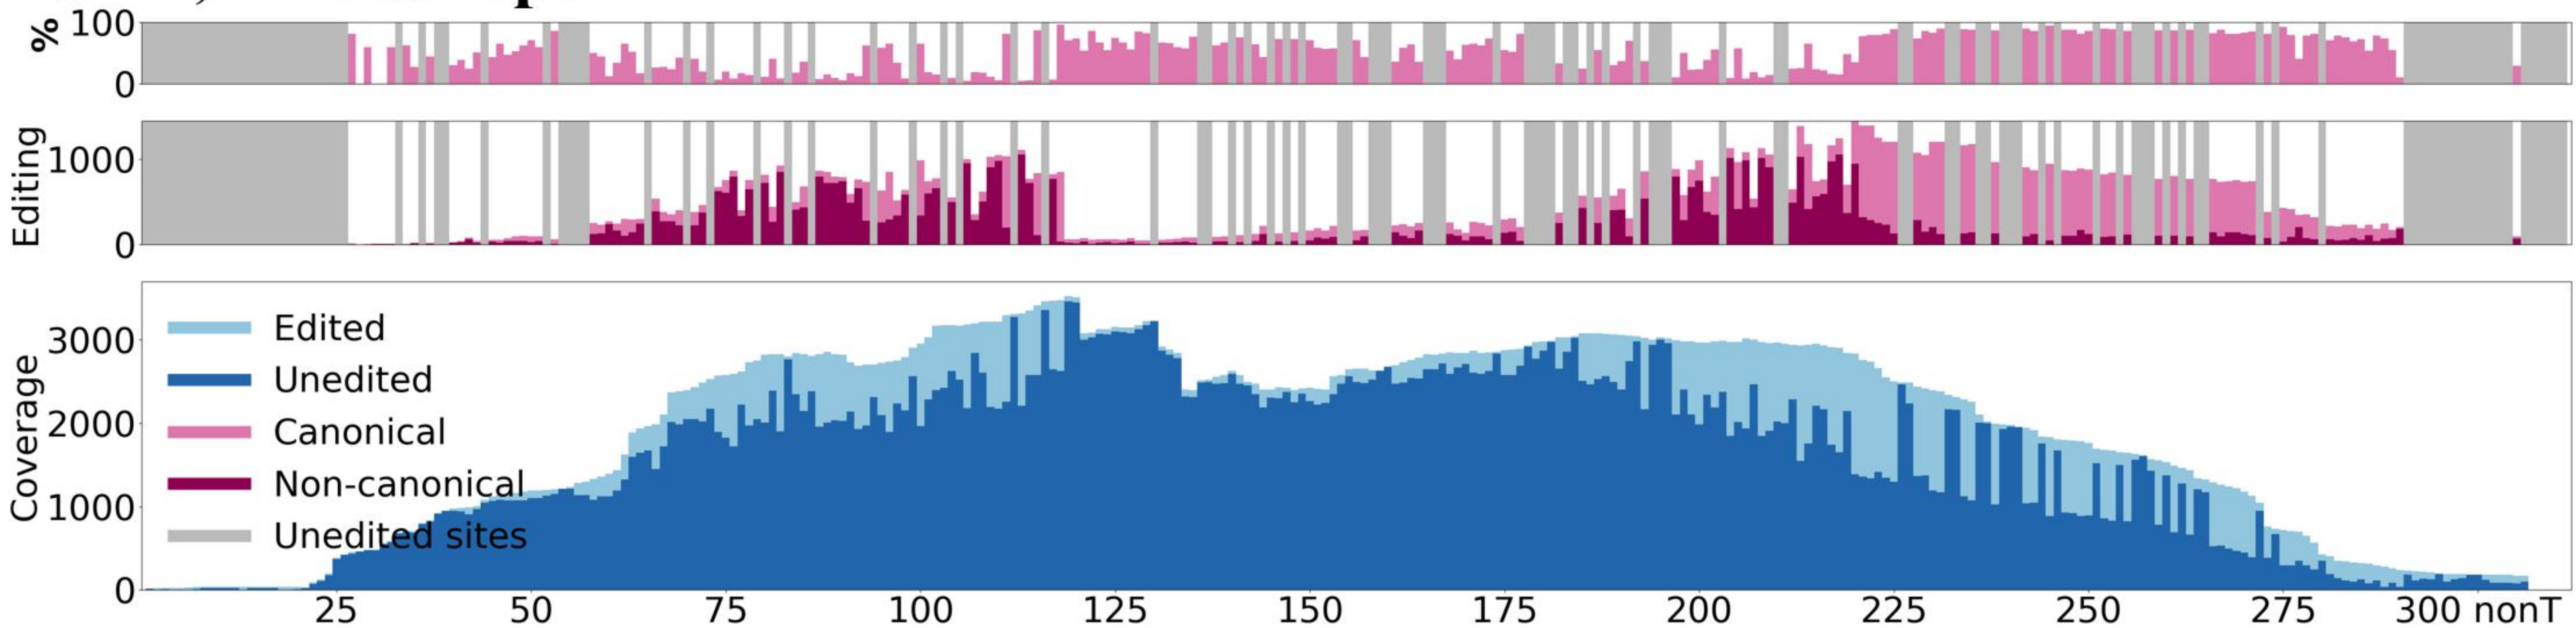

# SYL, A6 : slow

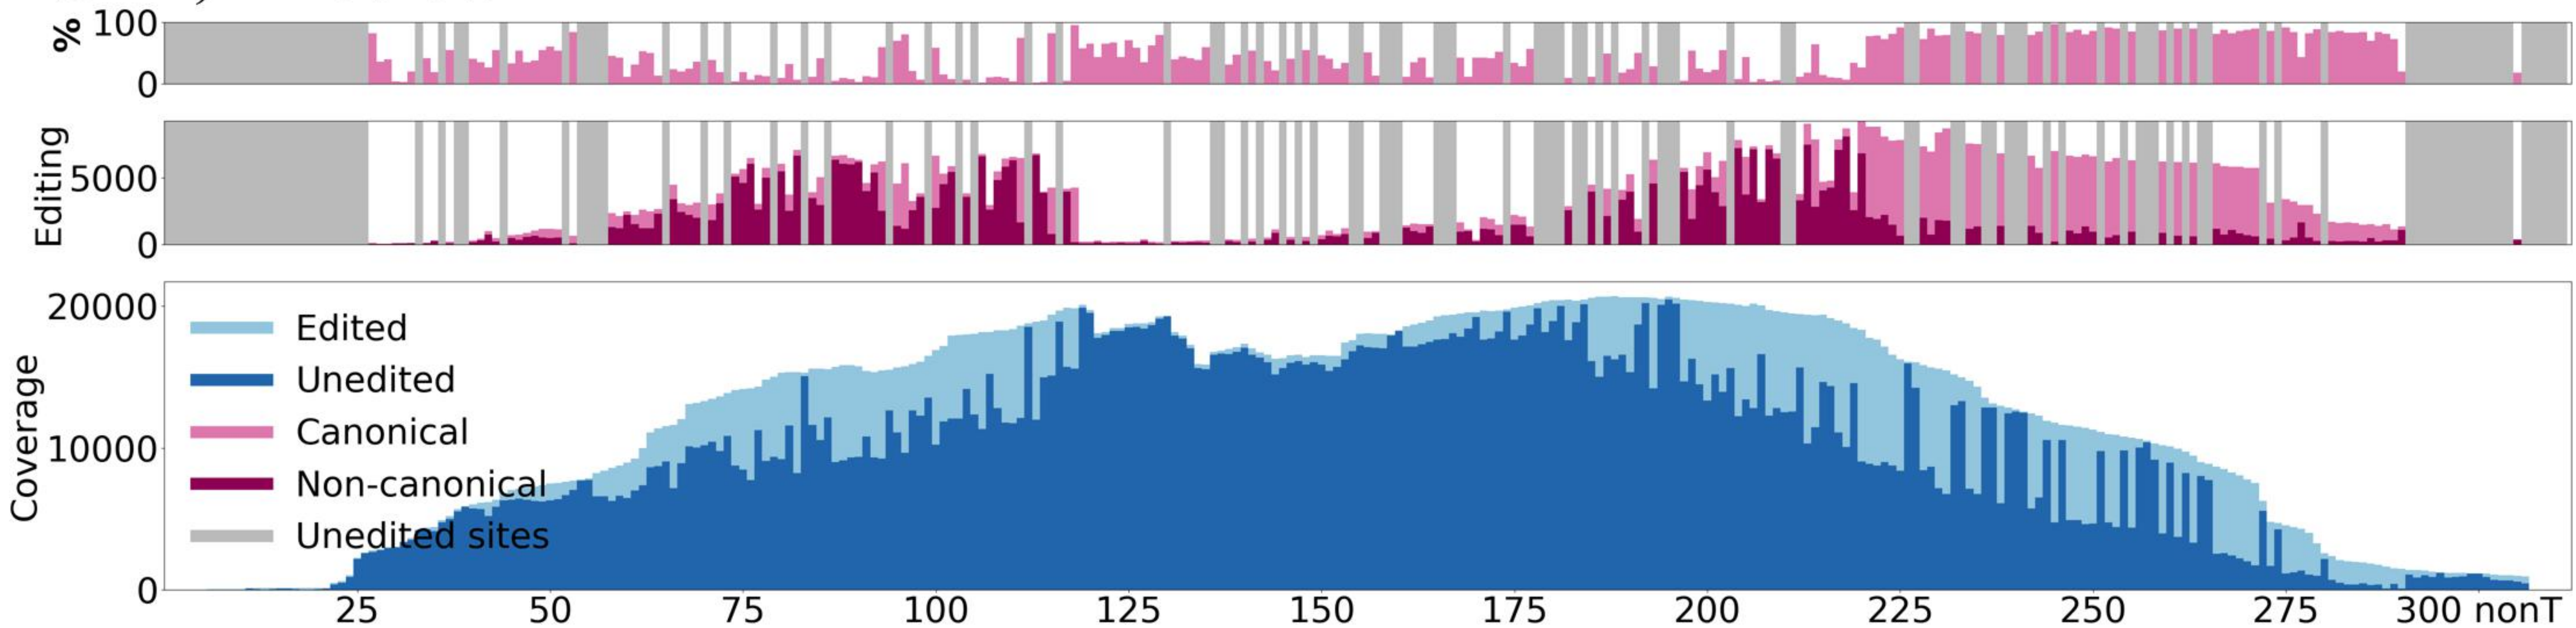

# SYL, A6 : slow

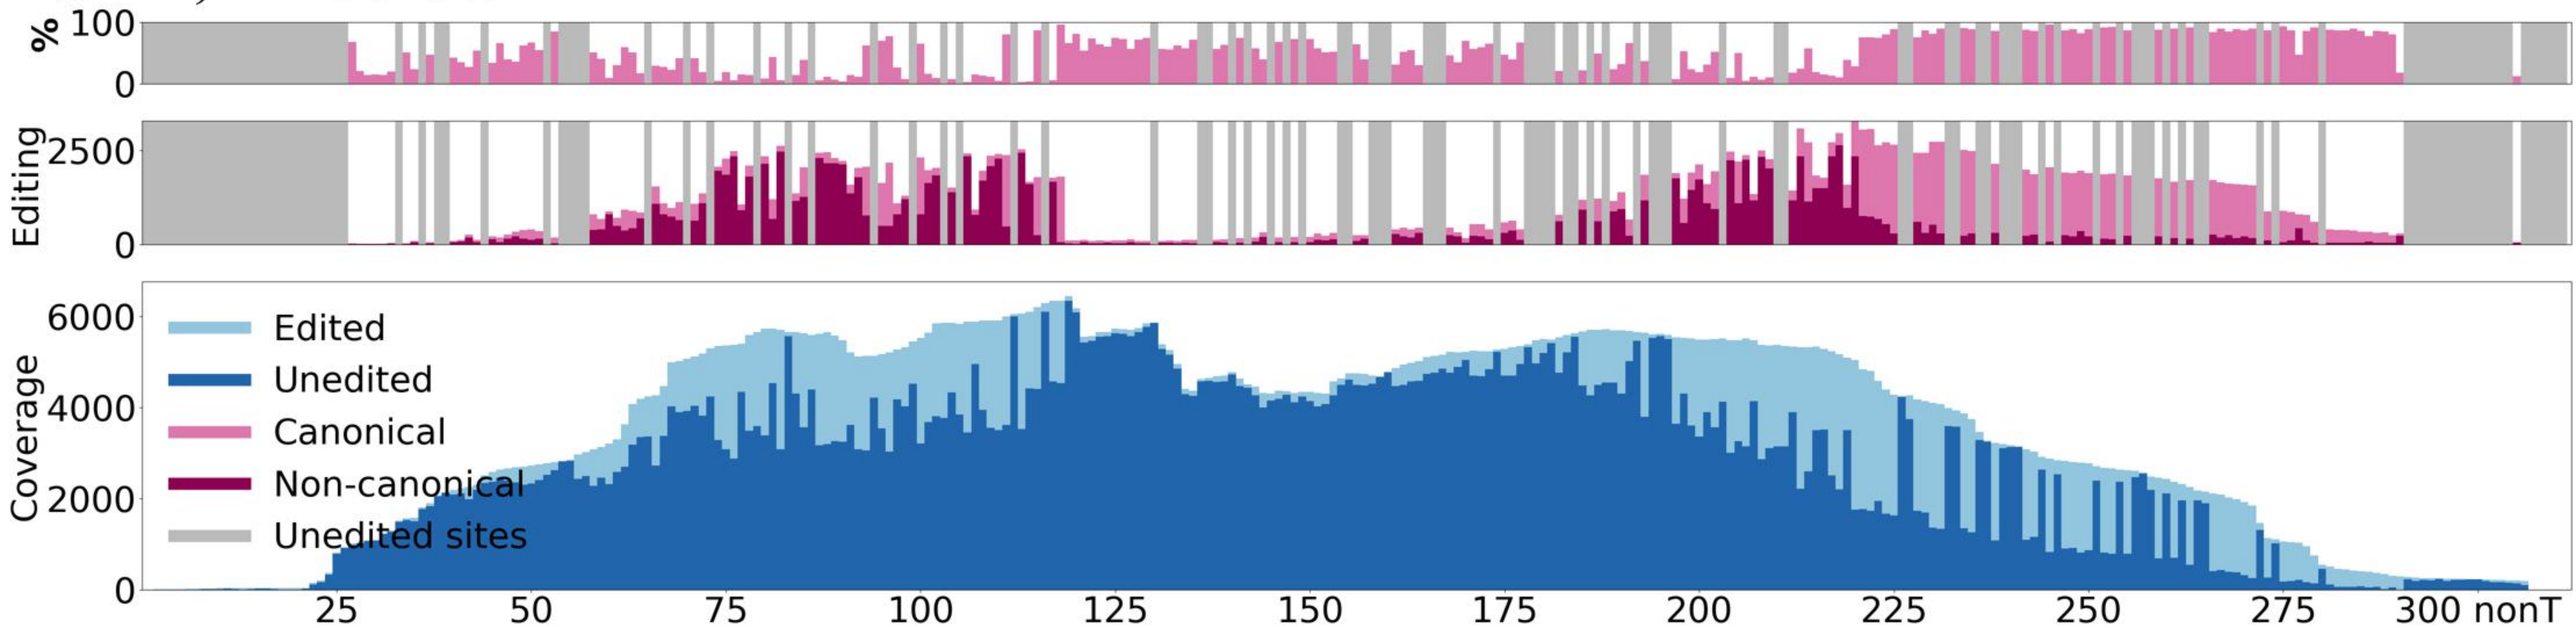

# SYL, A6 : mito

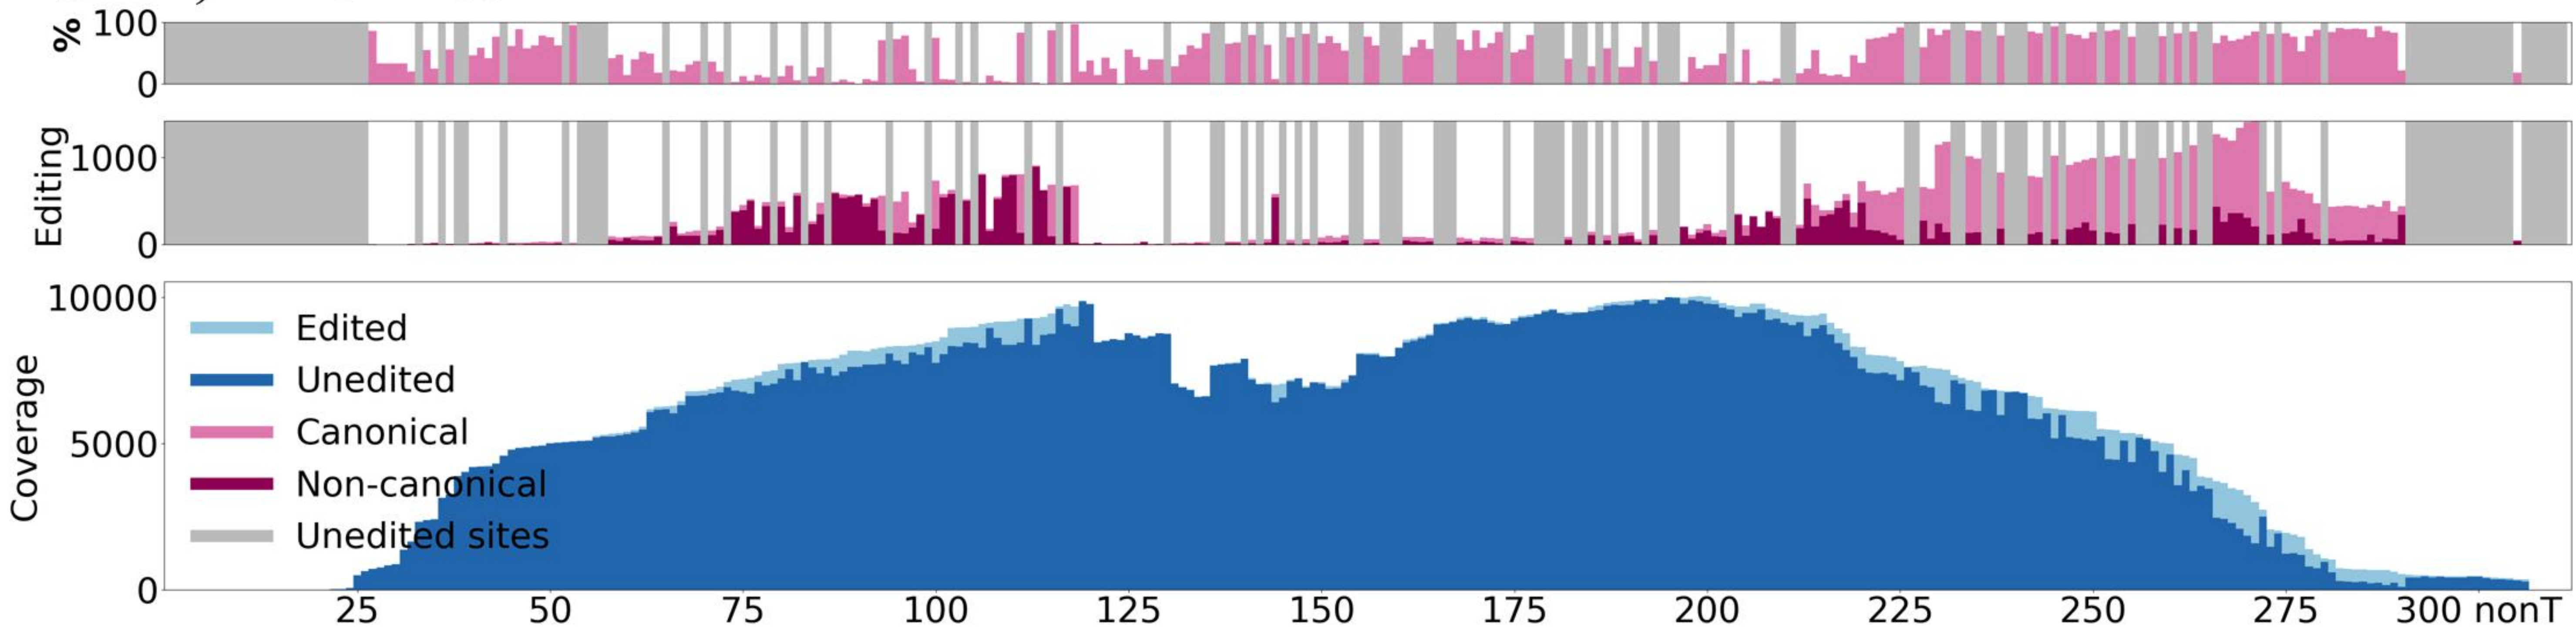

# SYL, A6 : mito

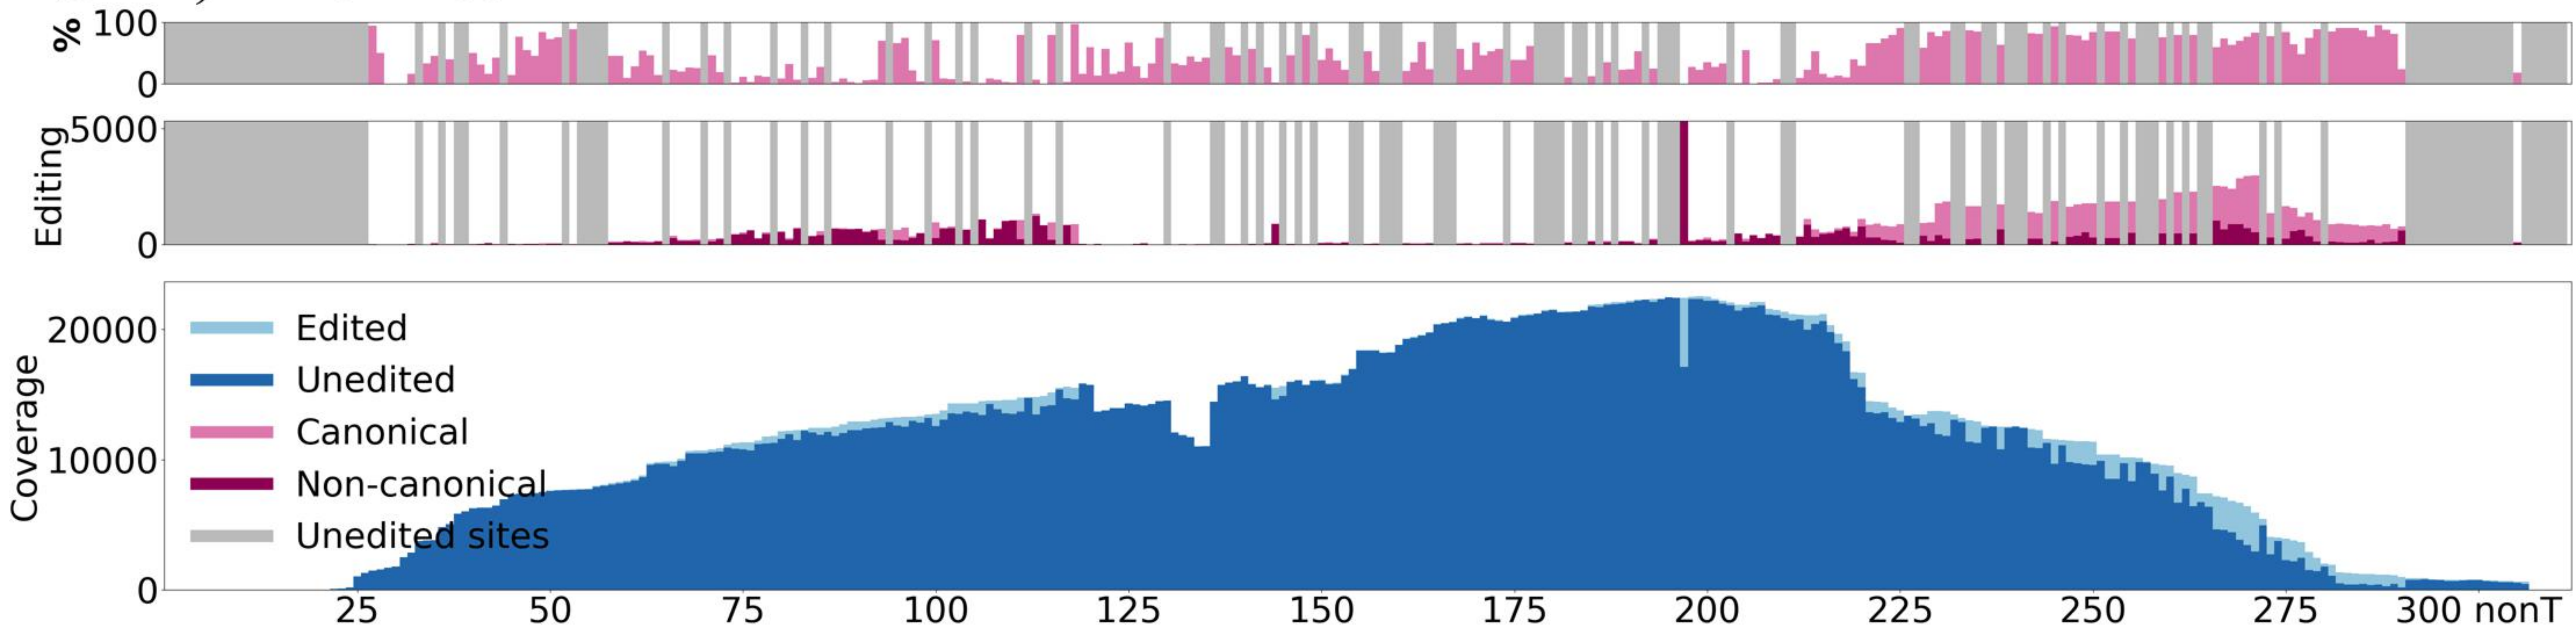

# SYL, A6 : total

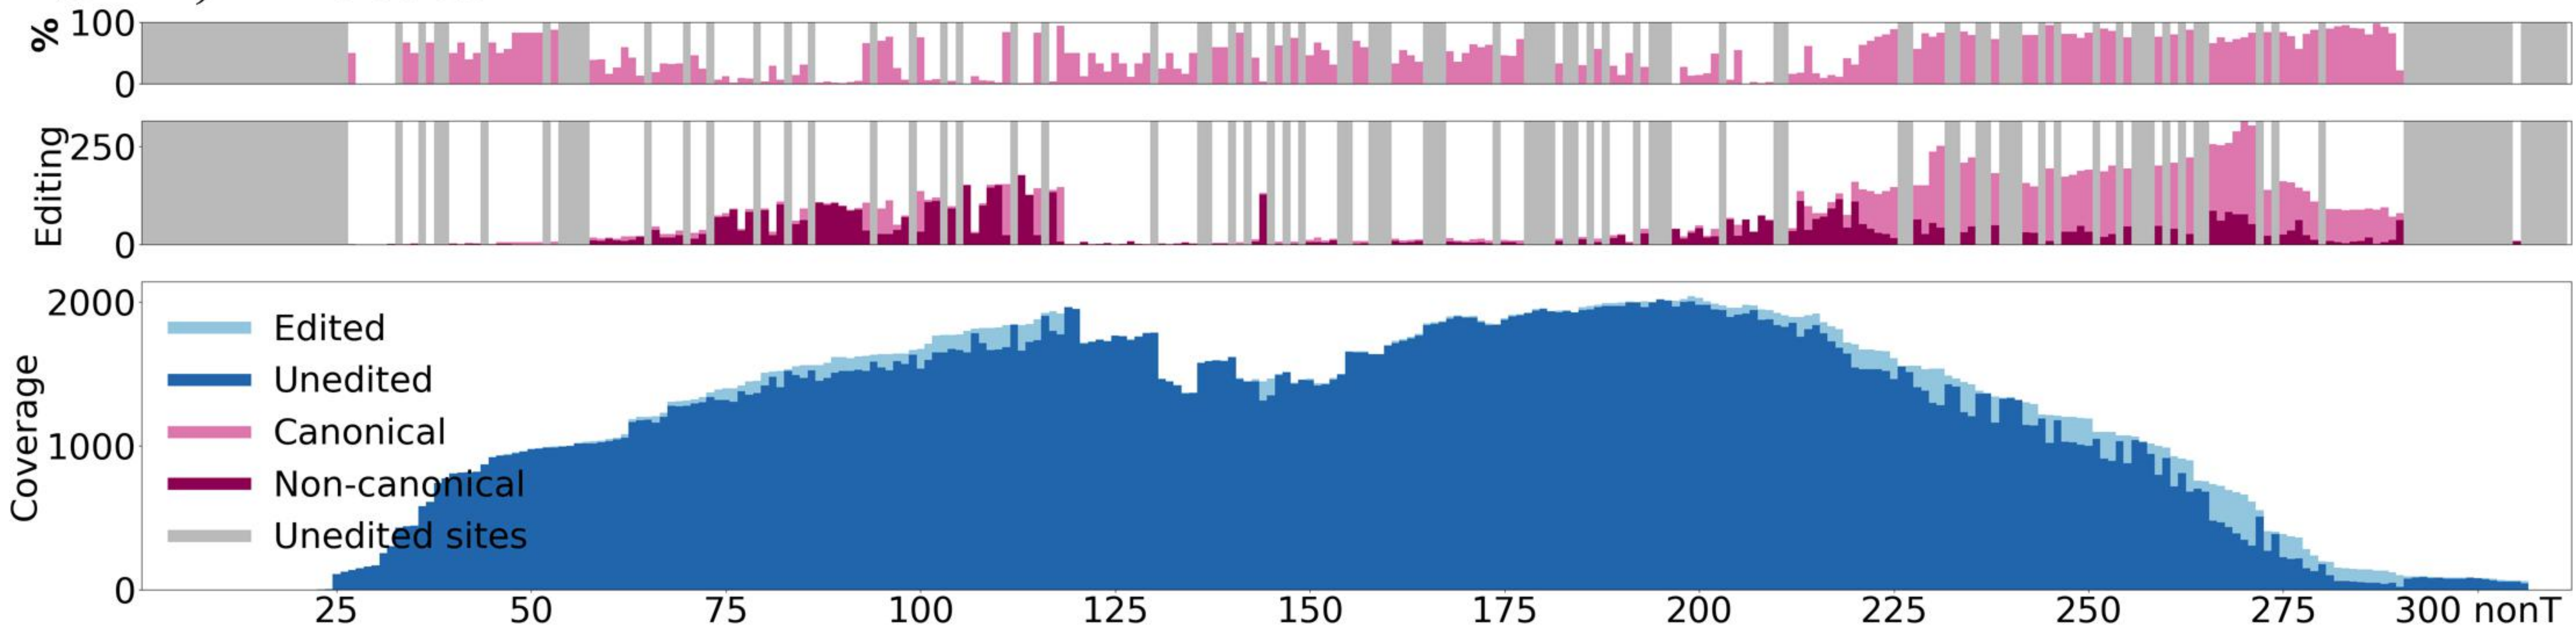

# SYL, A6 : total

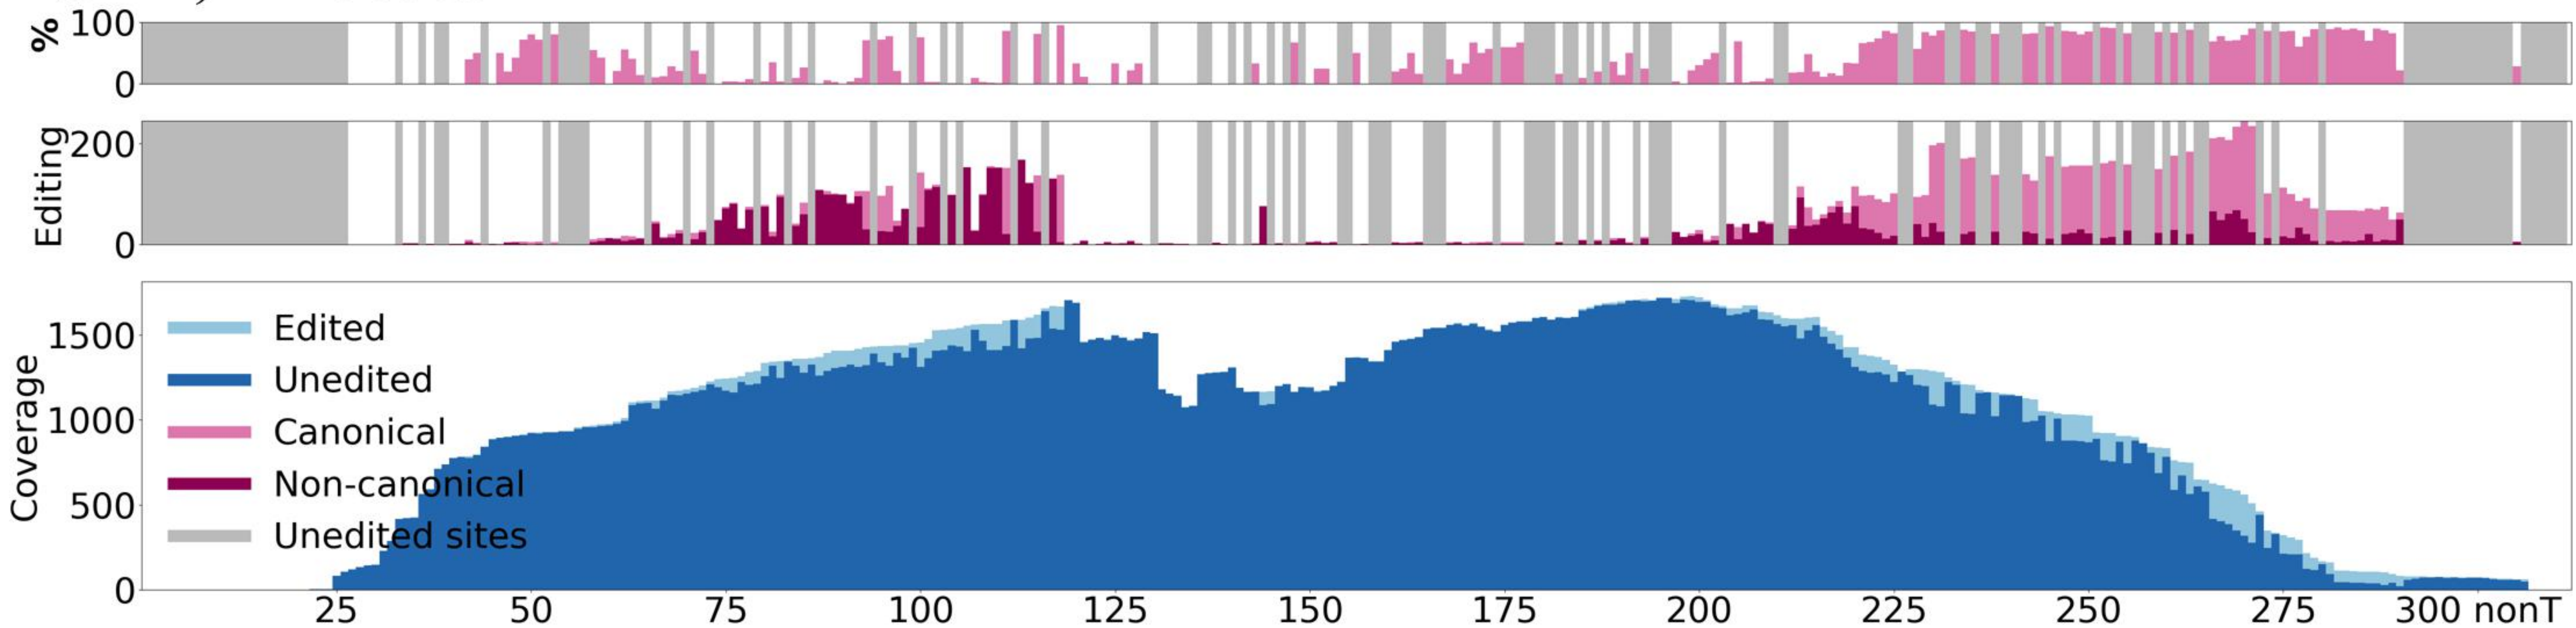

# SYL, CO2 : fed

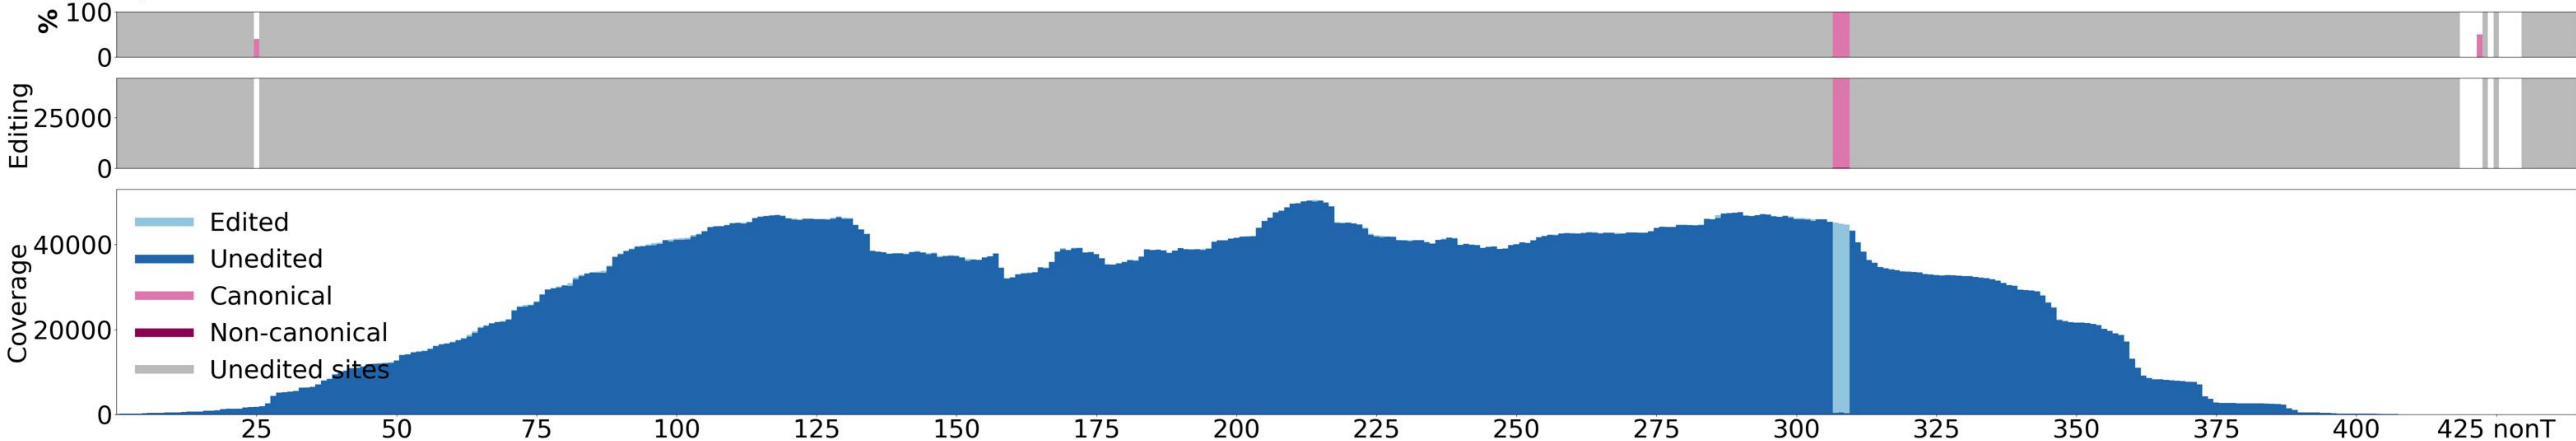

# SYL, CO2 : fed

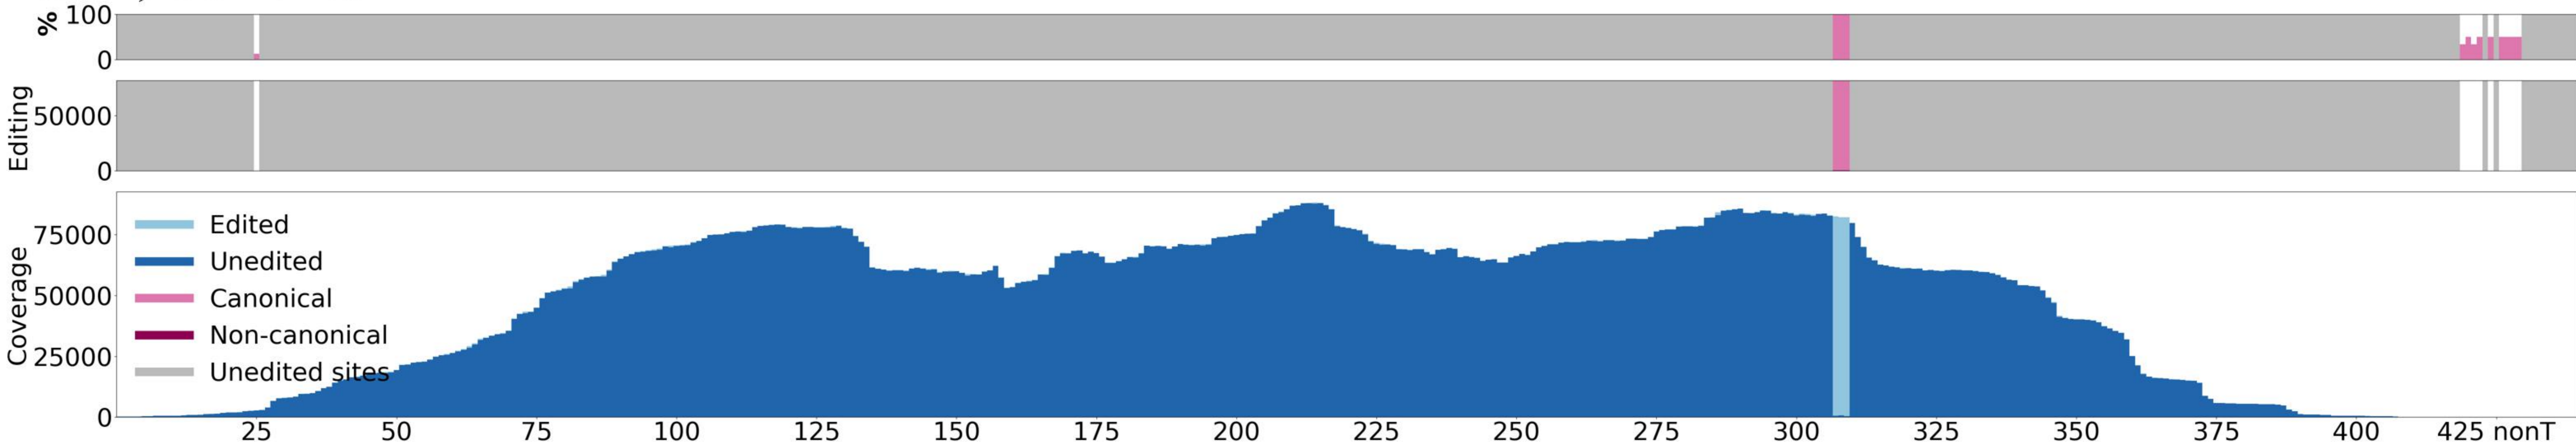

# SYL, CO2 : abrupt

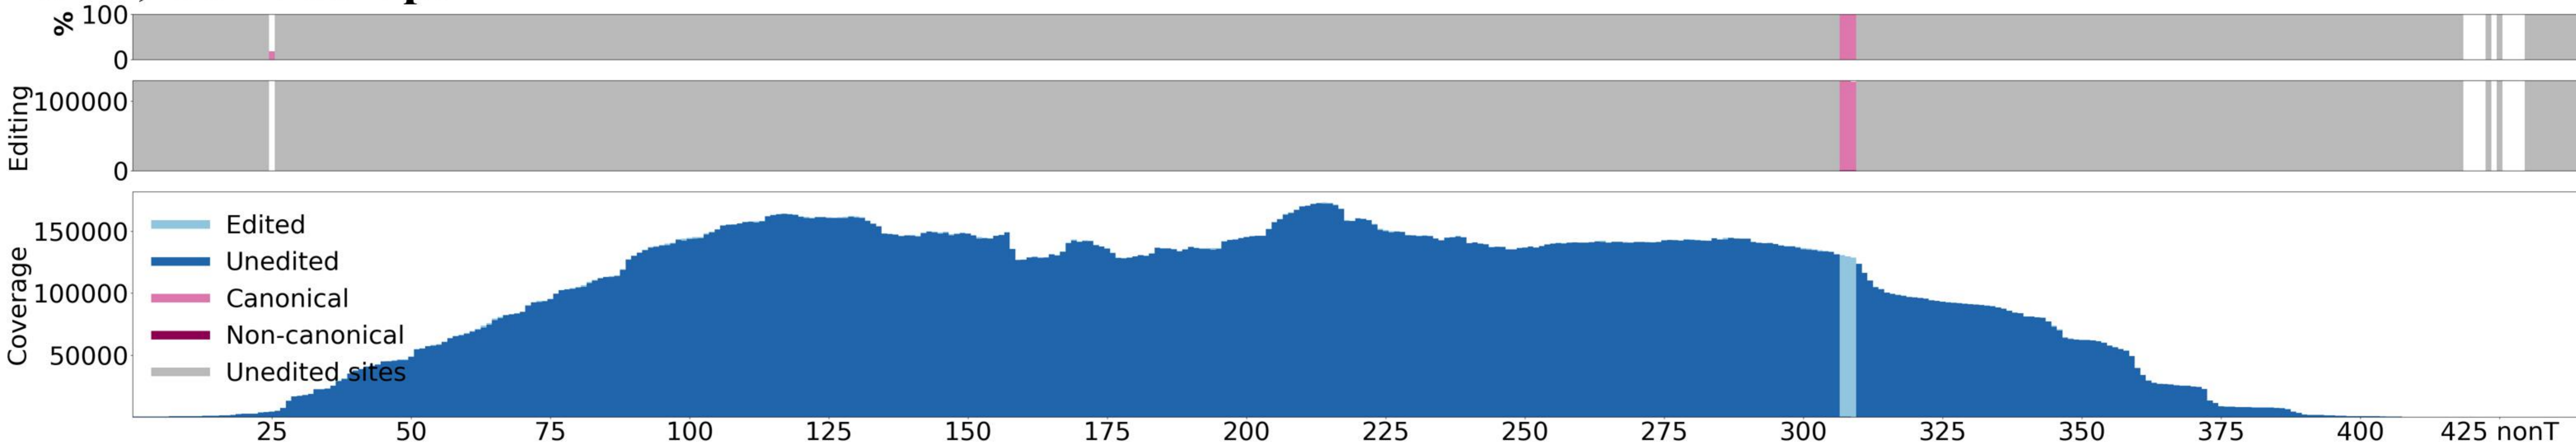

# SYL, CO2 : abrupt

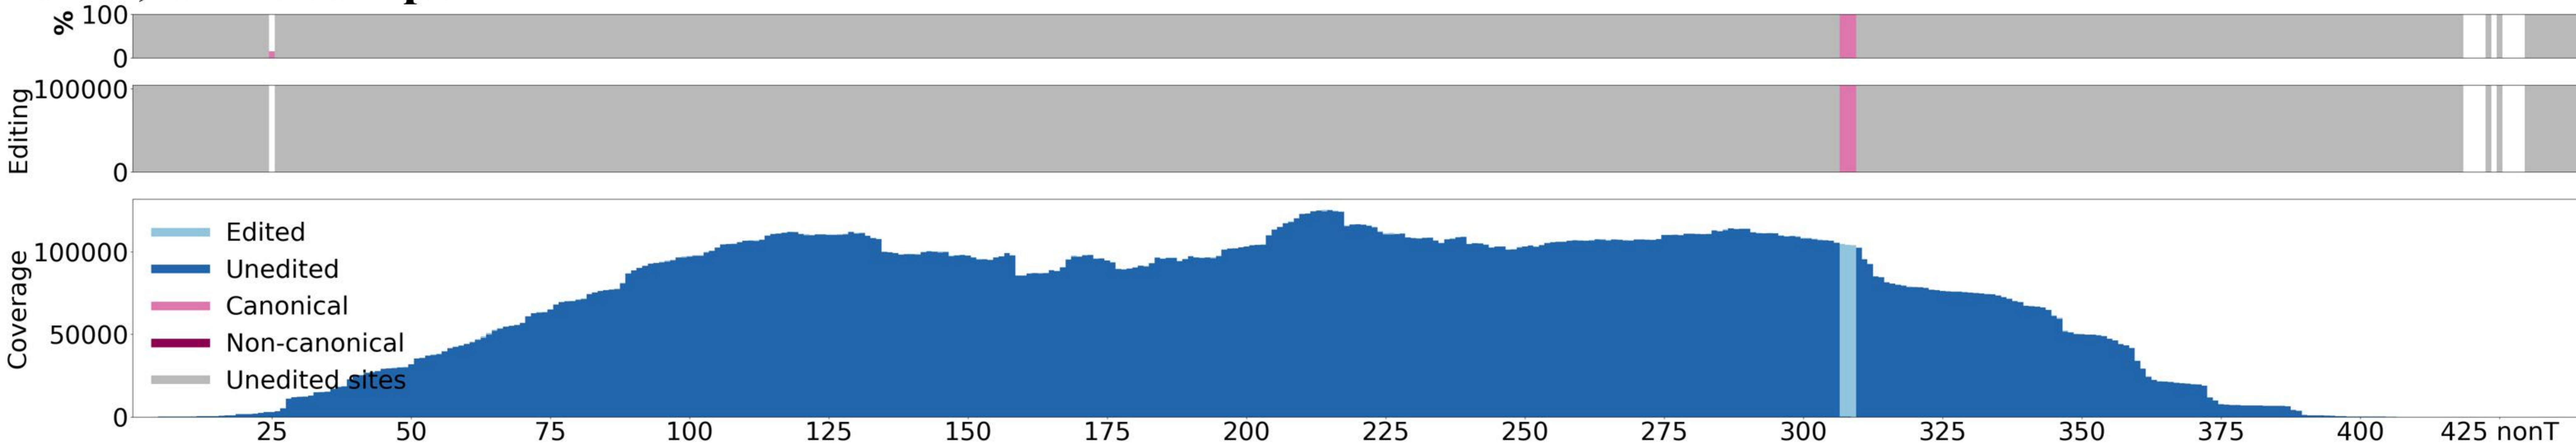

# SYL, CO2 : slow

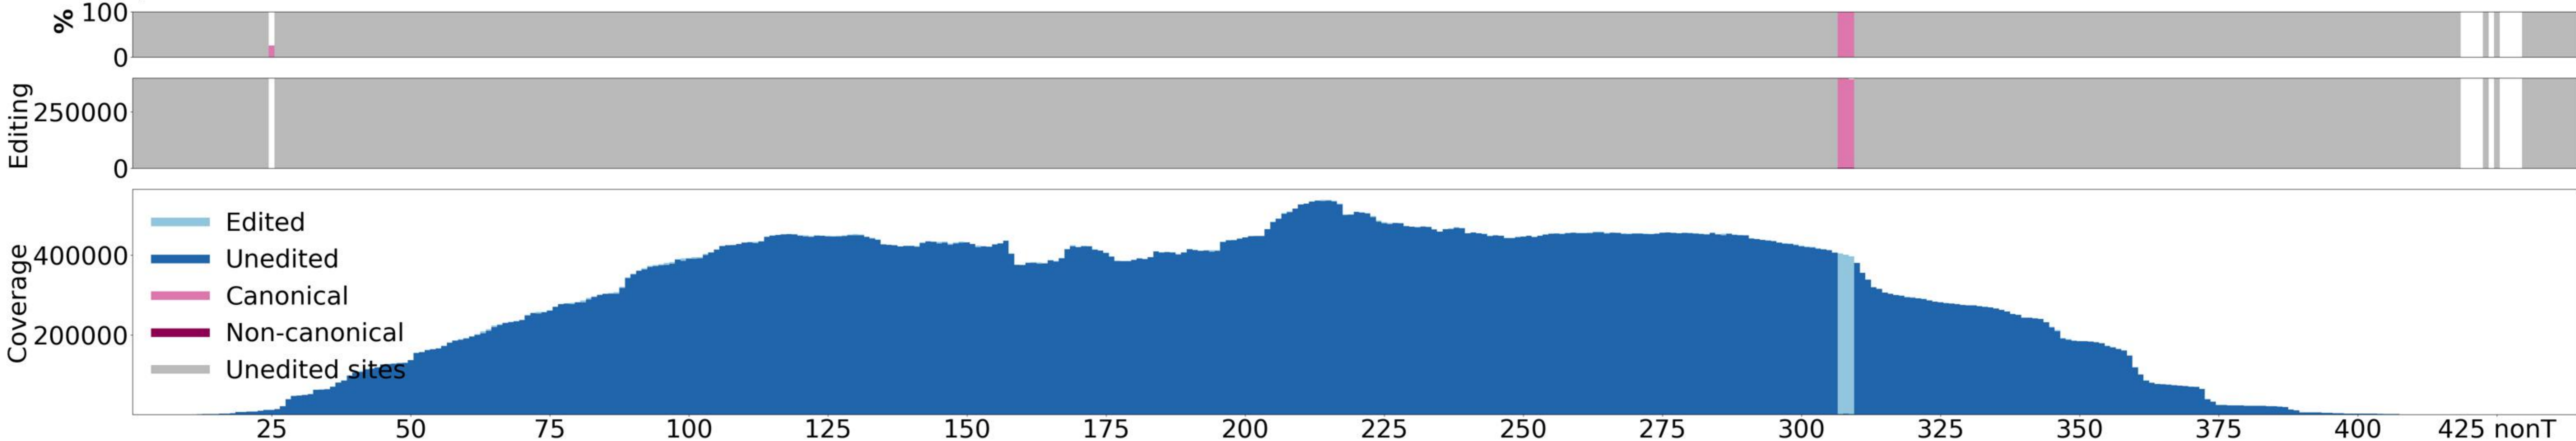

# SYL, CO2 : slow

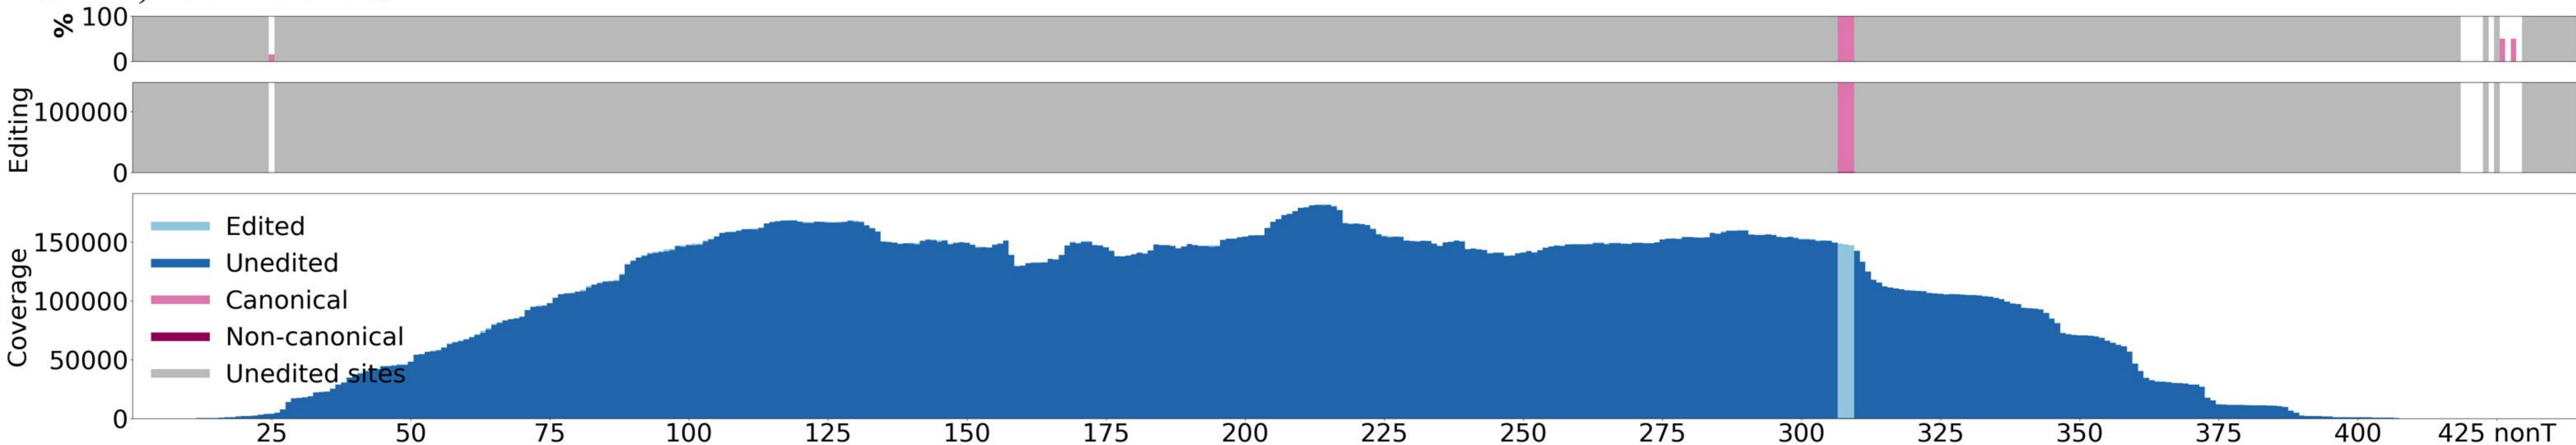

# SYL, CO2 : mito

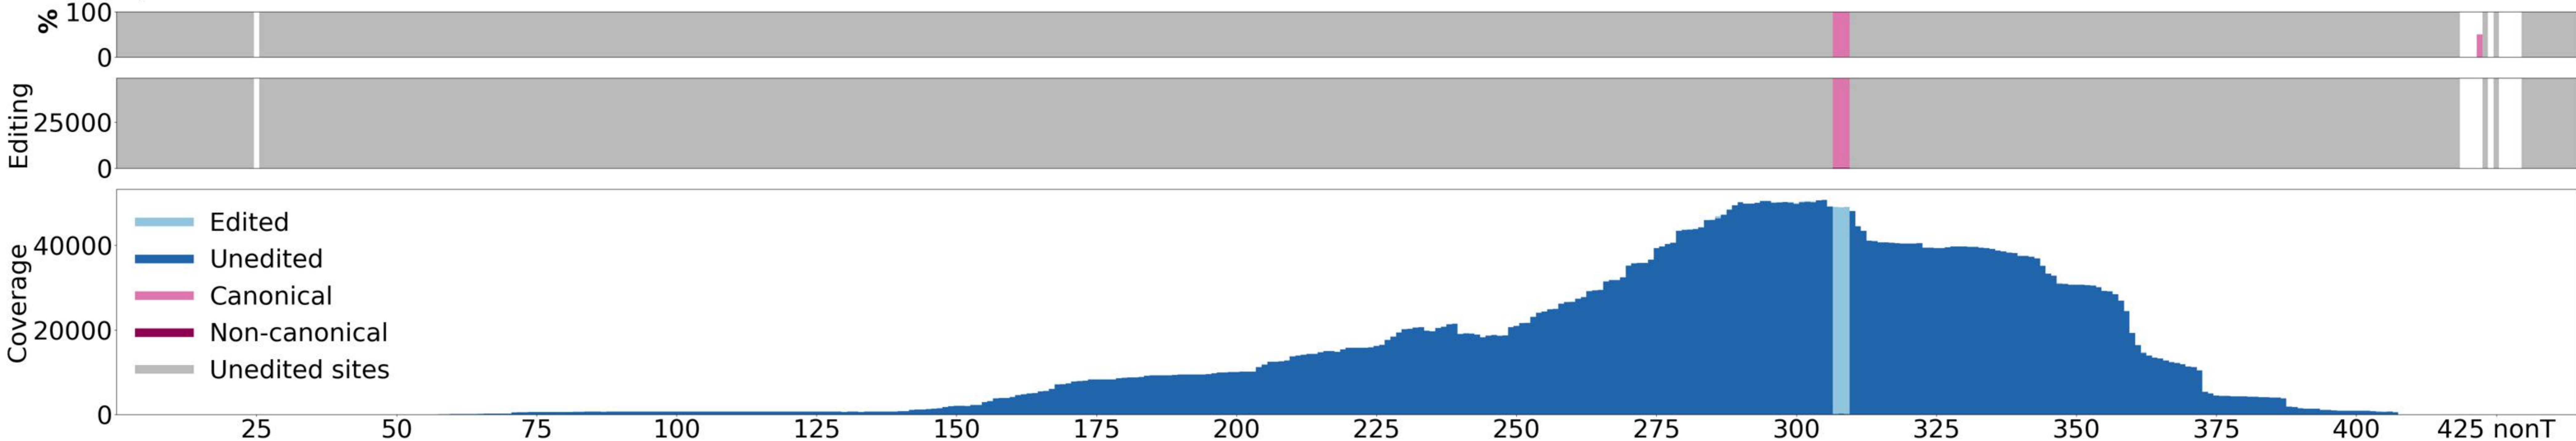

# SYL, CO2 : mito

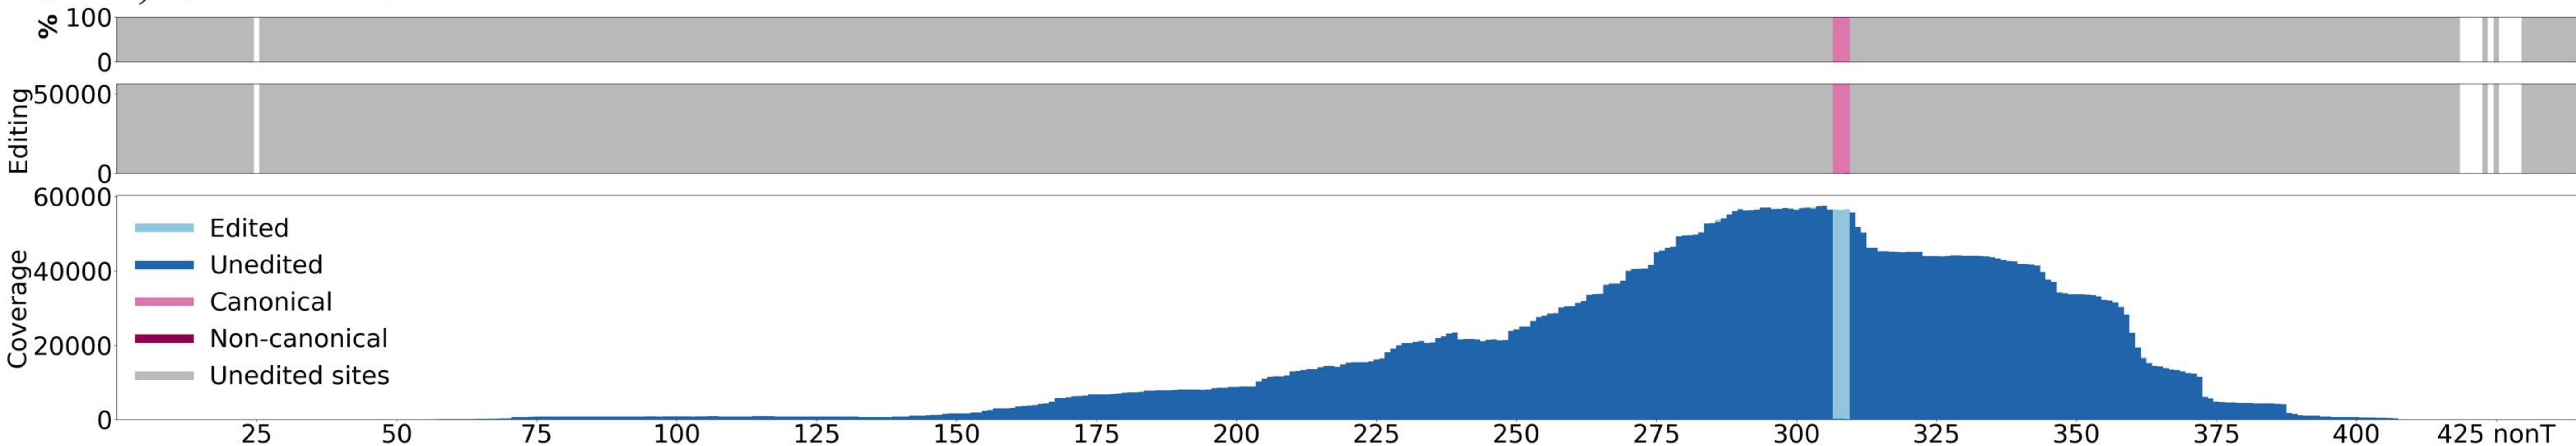

# SYL, CO2 : total

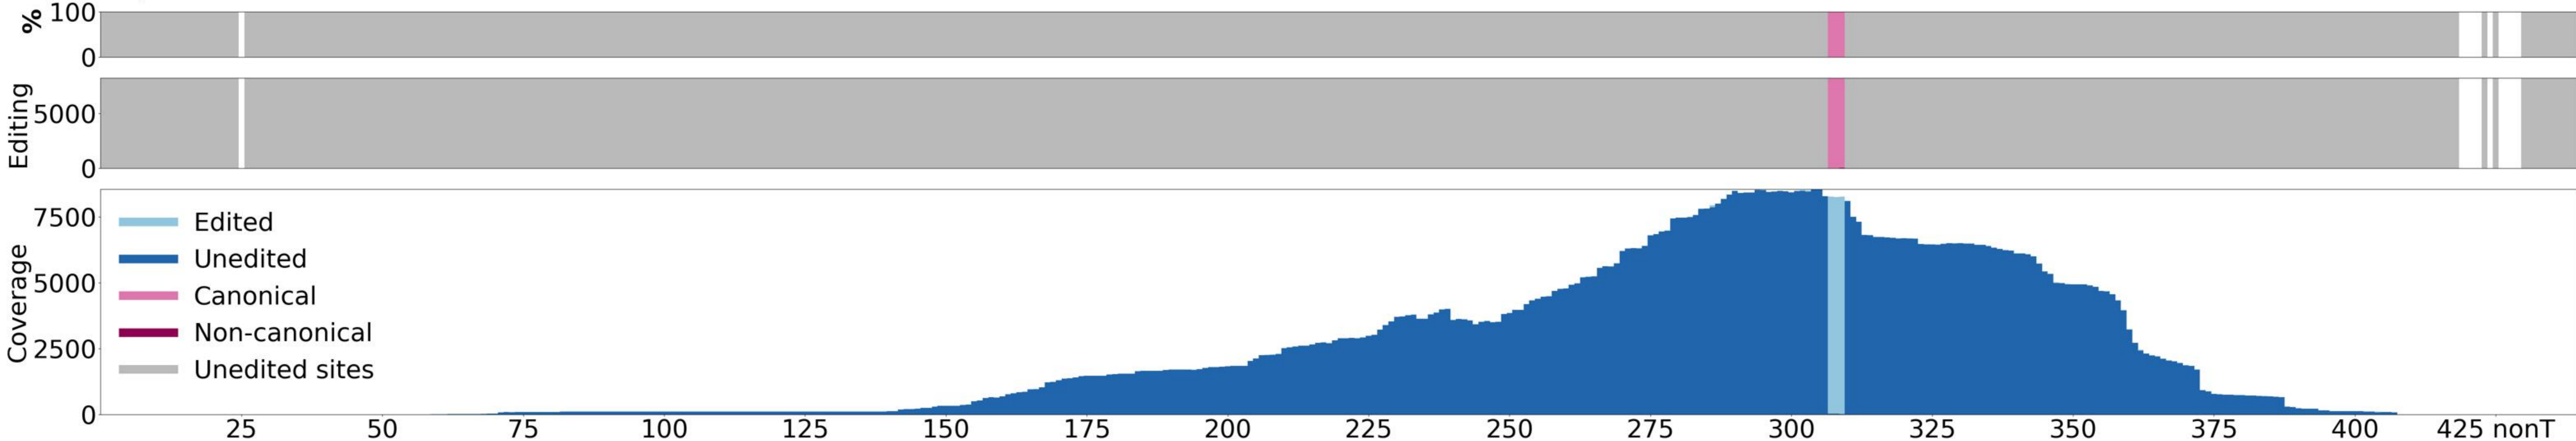

# SYL, CO2 : total

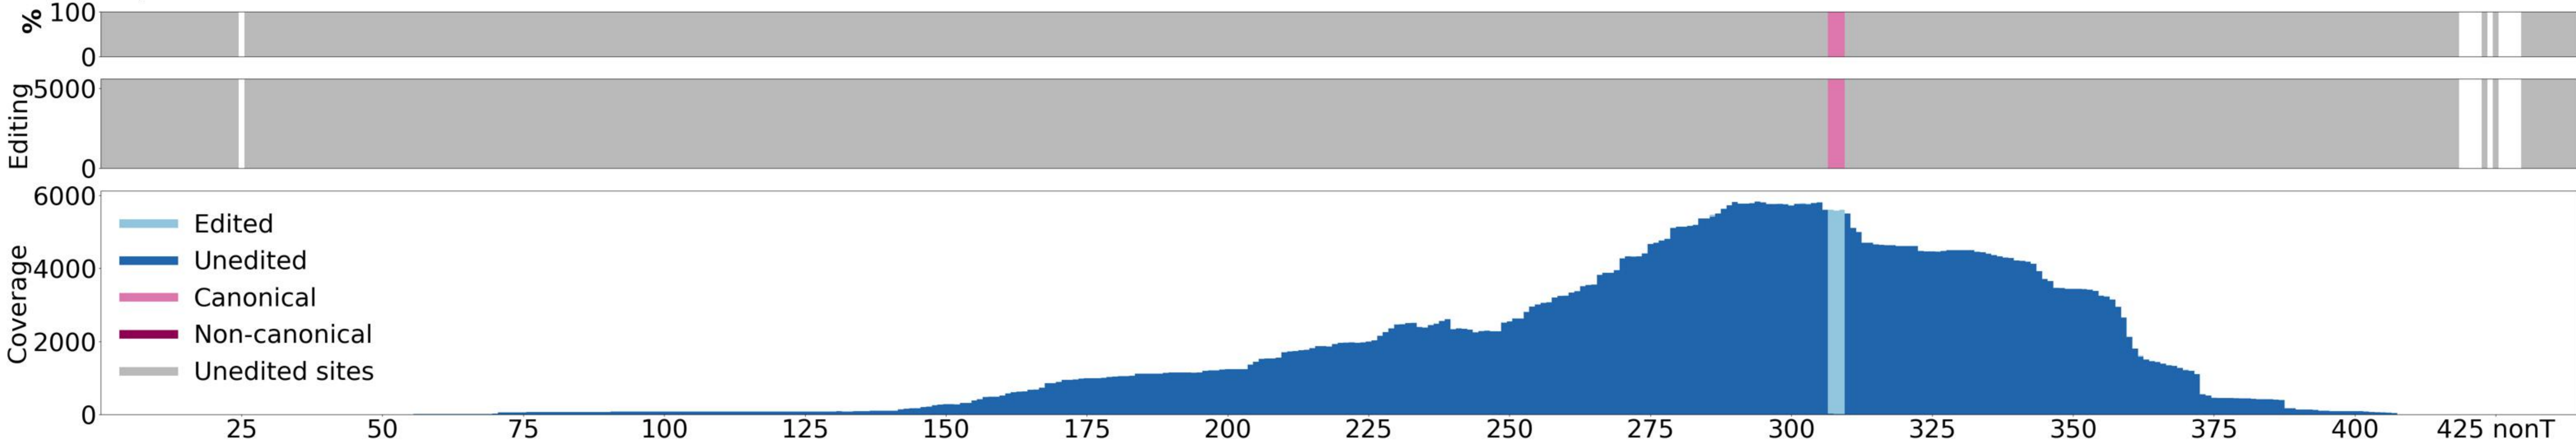

# SYL, CO3 : fed

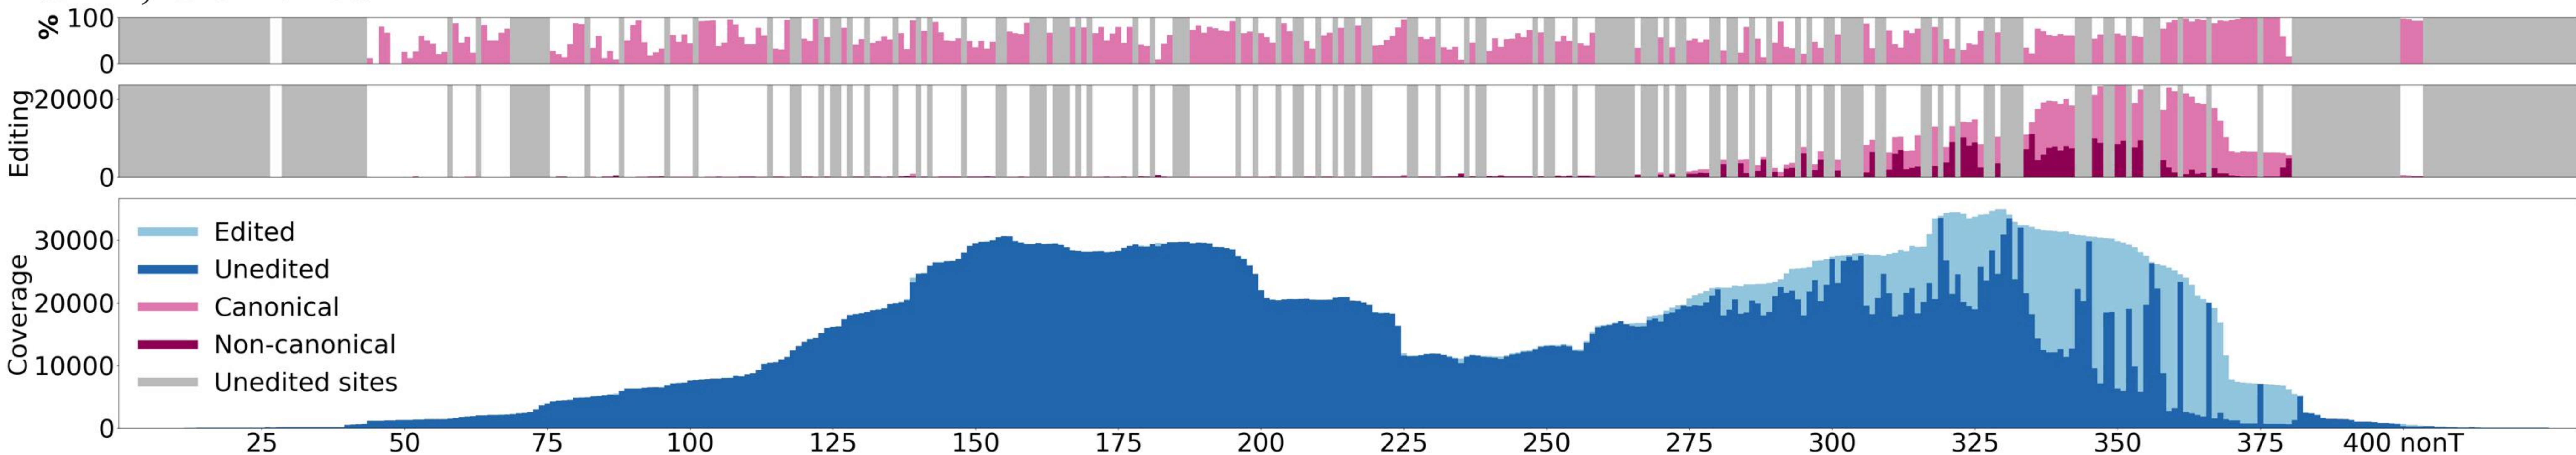

# SYL, CO3 : fed

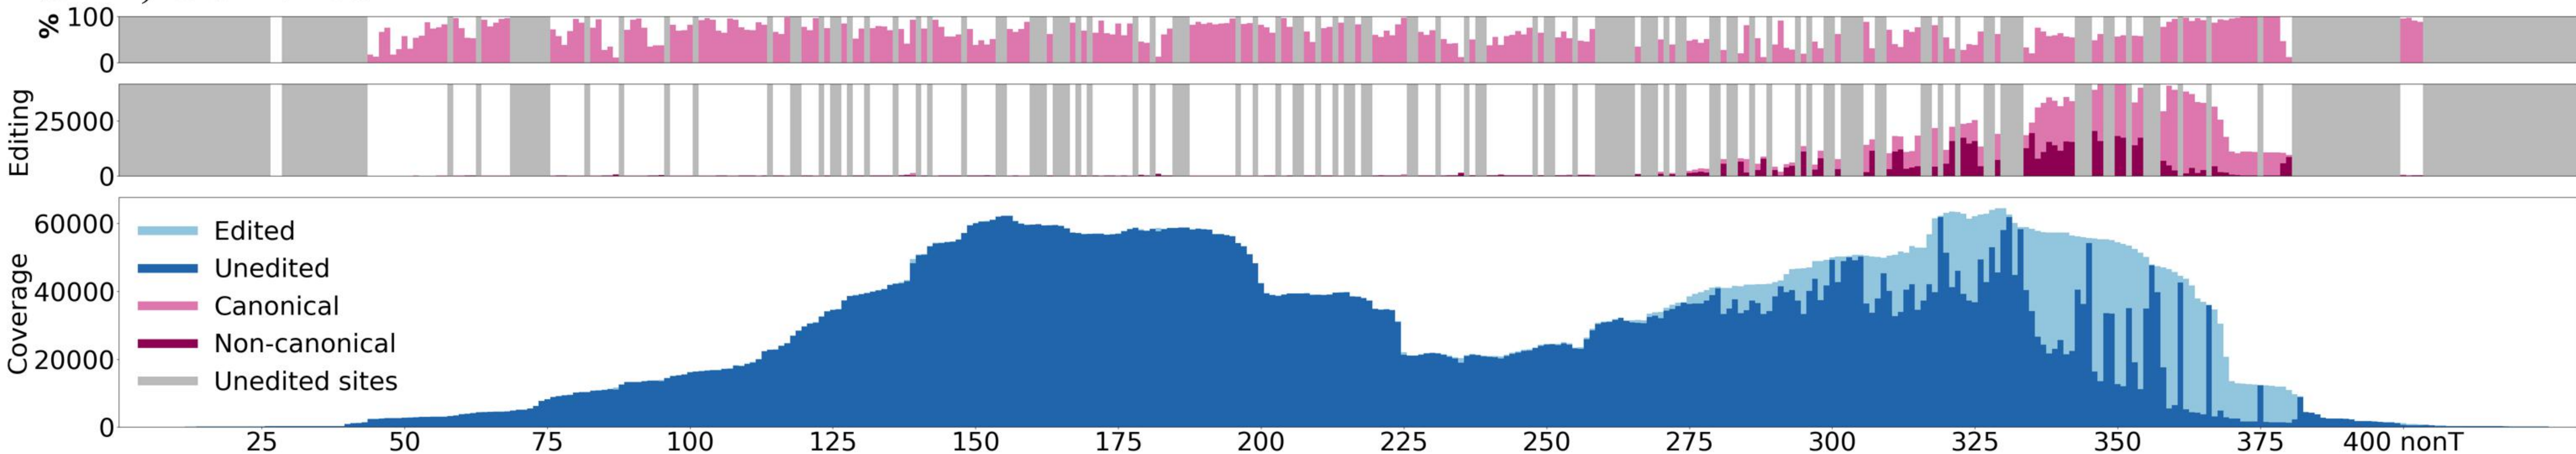

# SYL, CO3 : abrupt

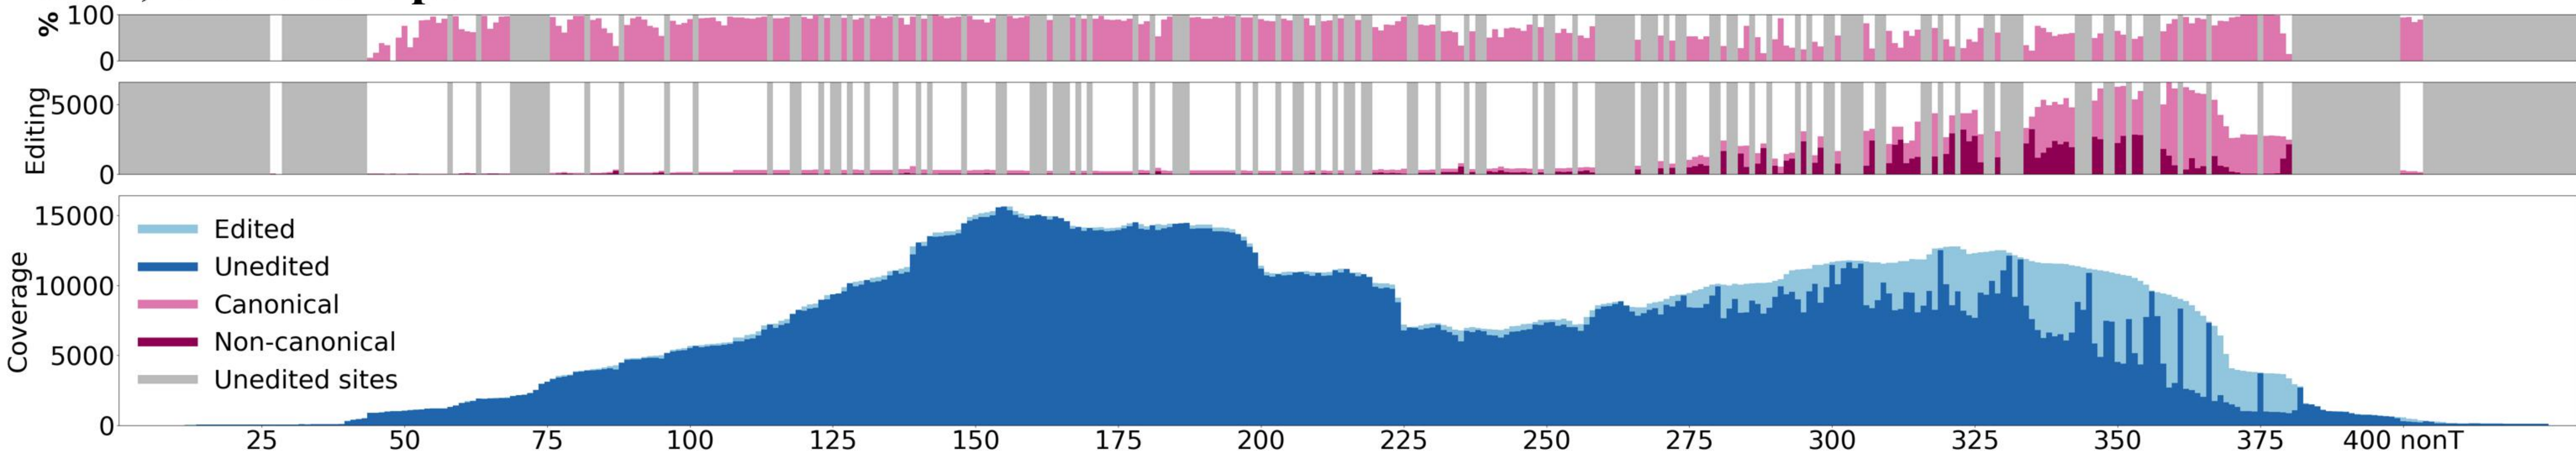

# SYL, CO3 : abrupt

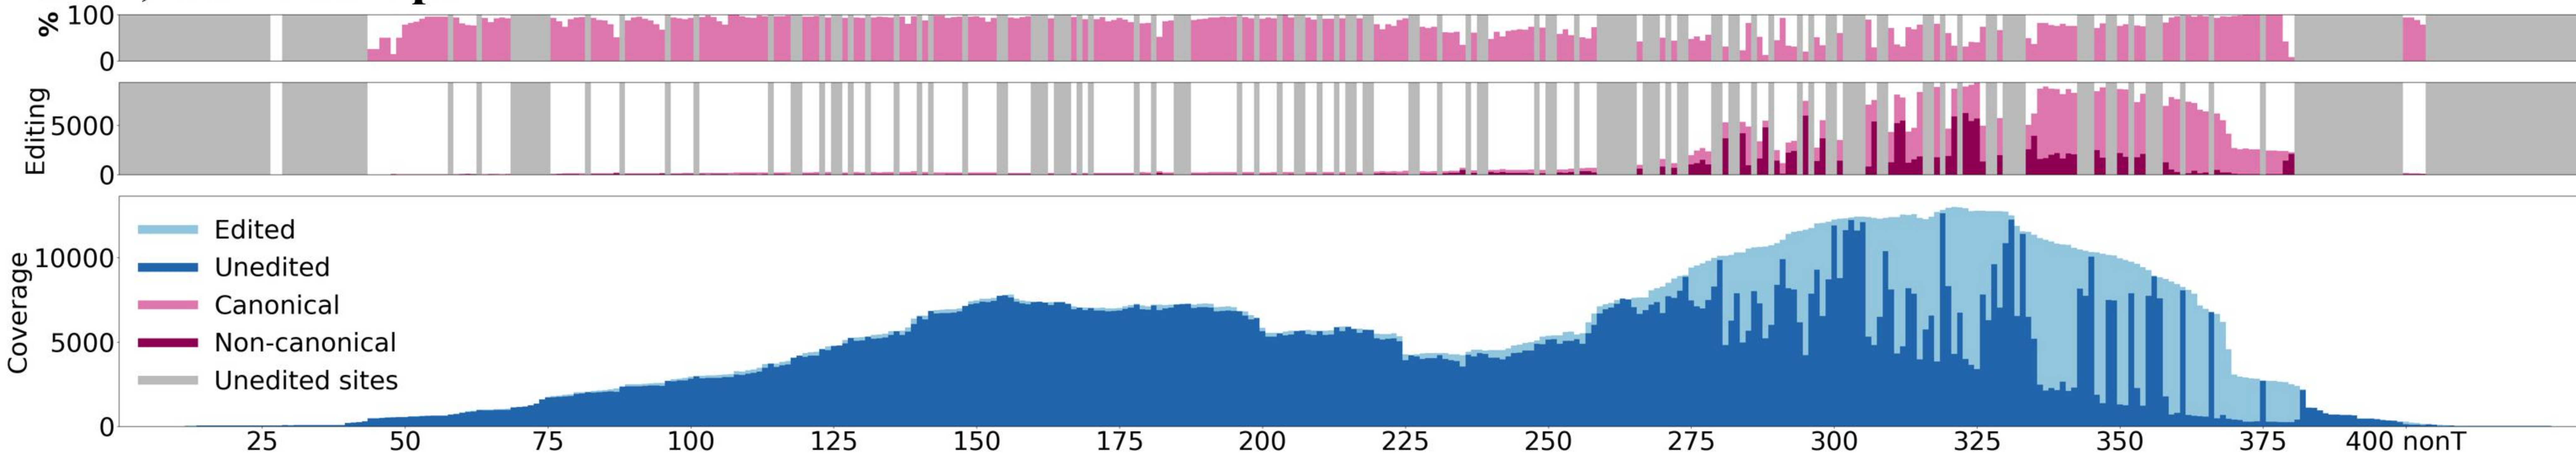

# SYL, CO3 : slow

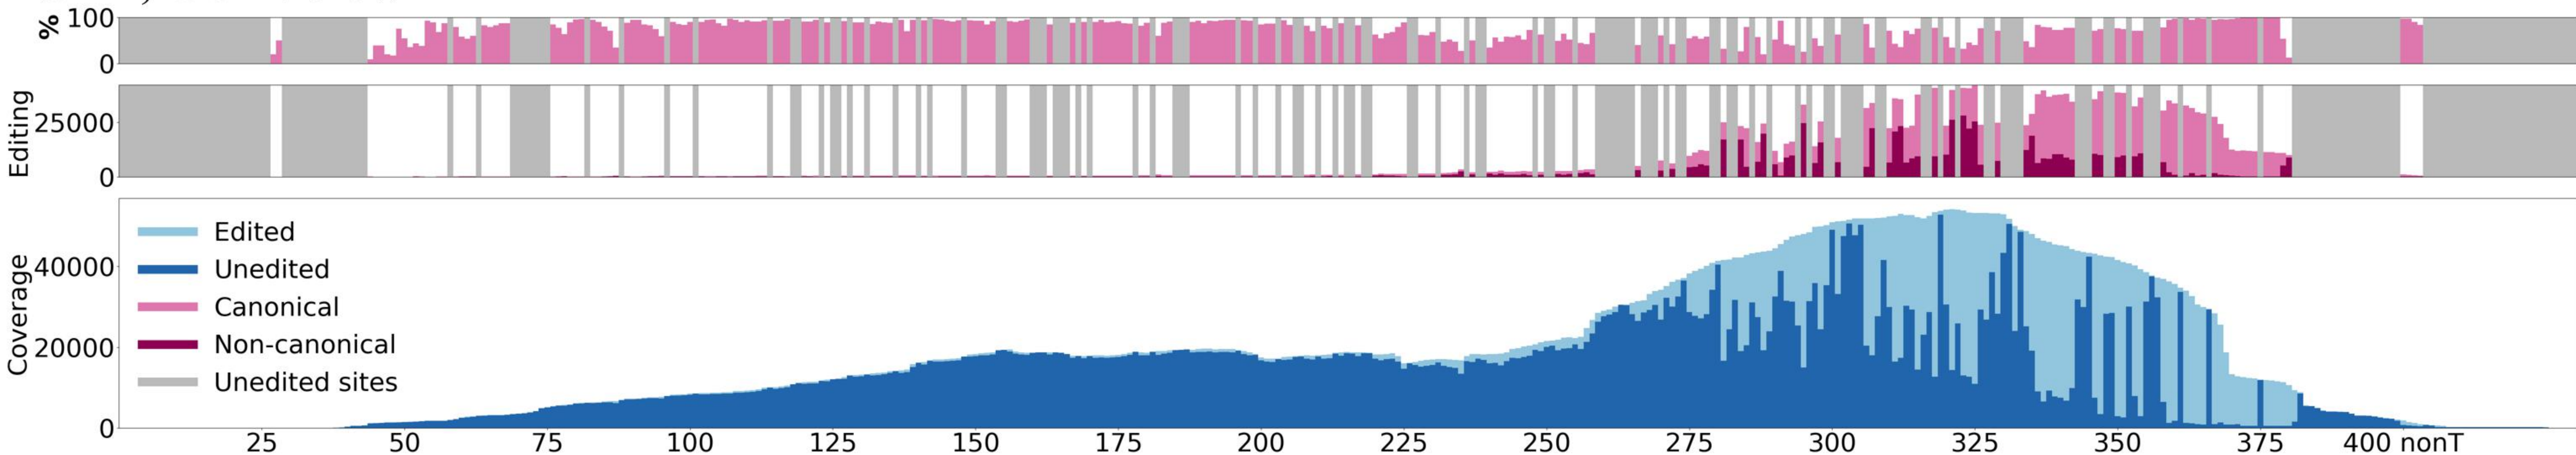

# SYL, CO3 : slow

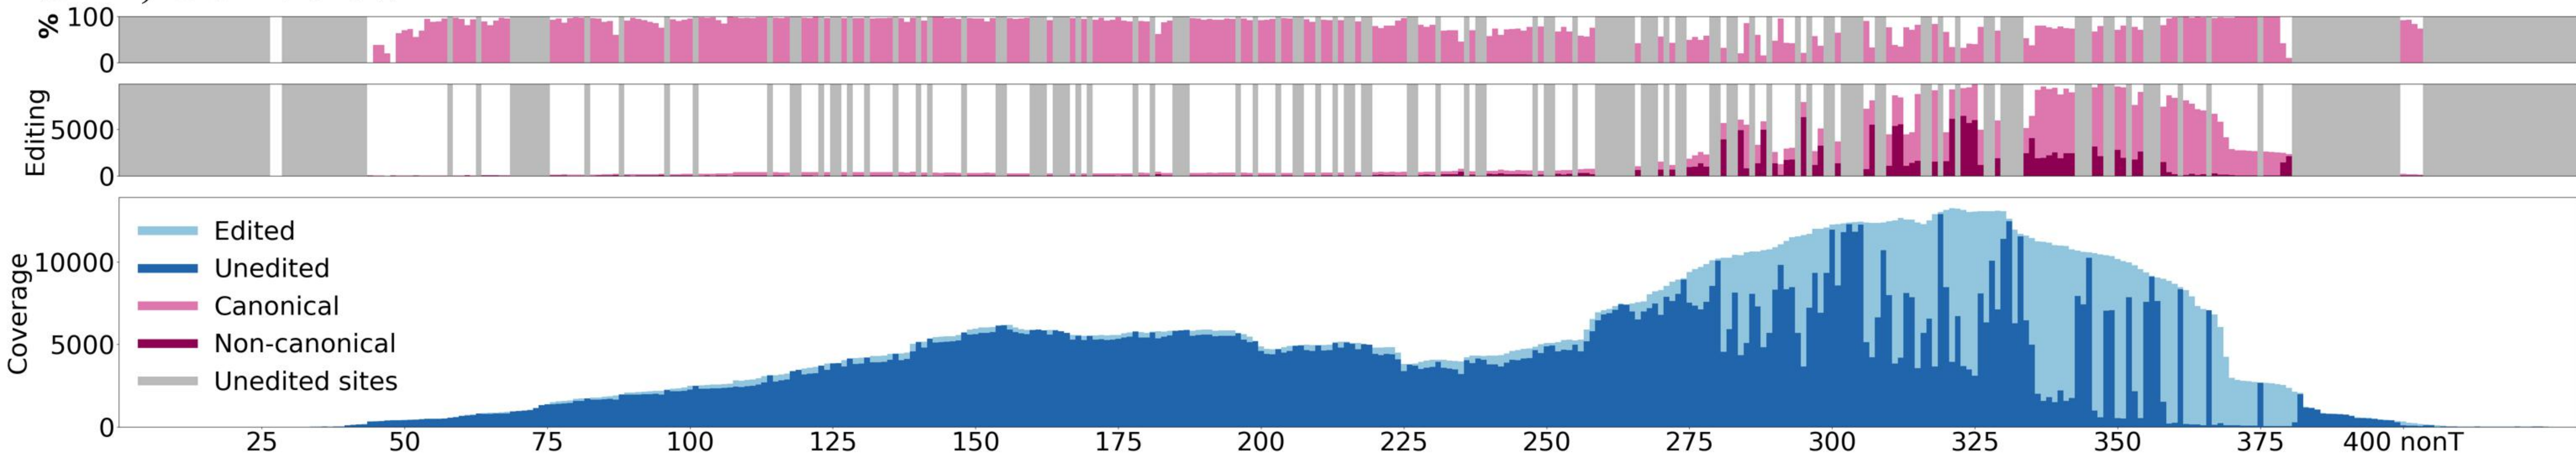

# SYL, CO3 : mito

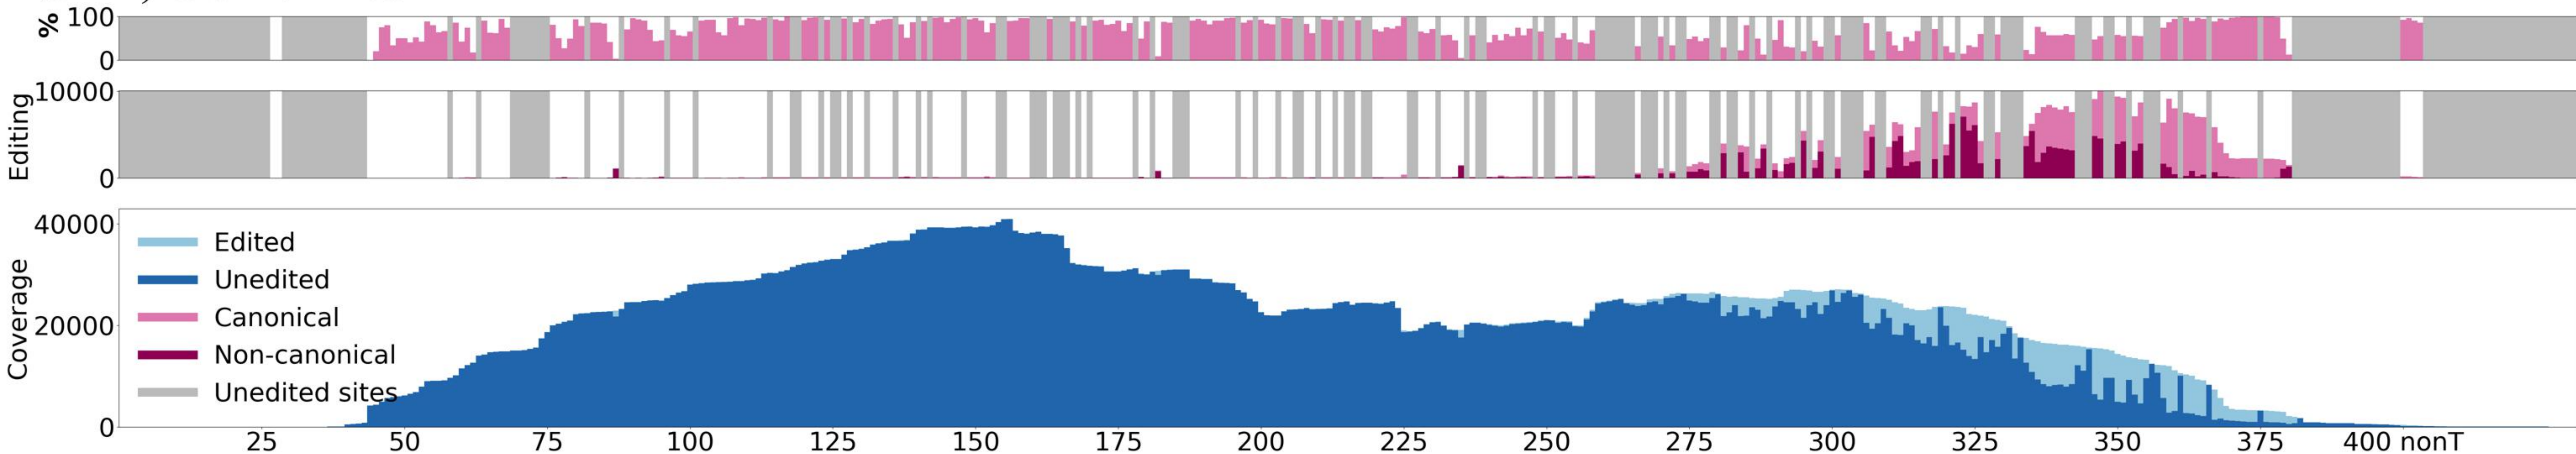

# SYL, CO3 : mito

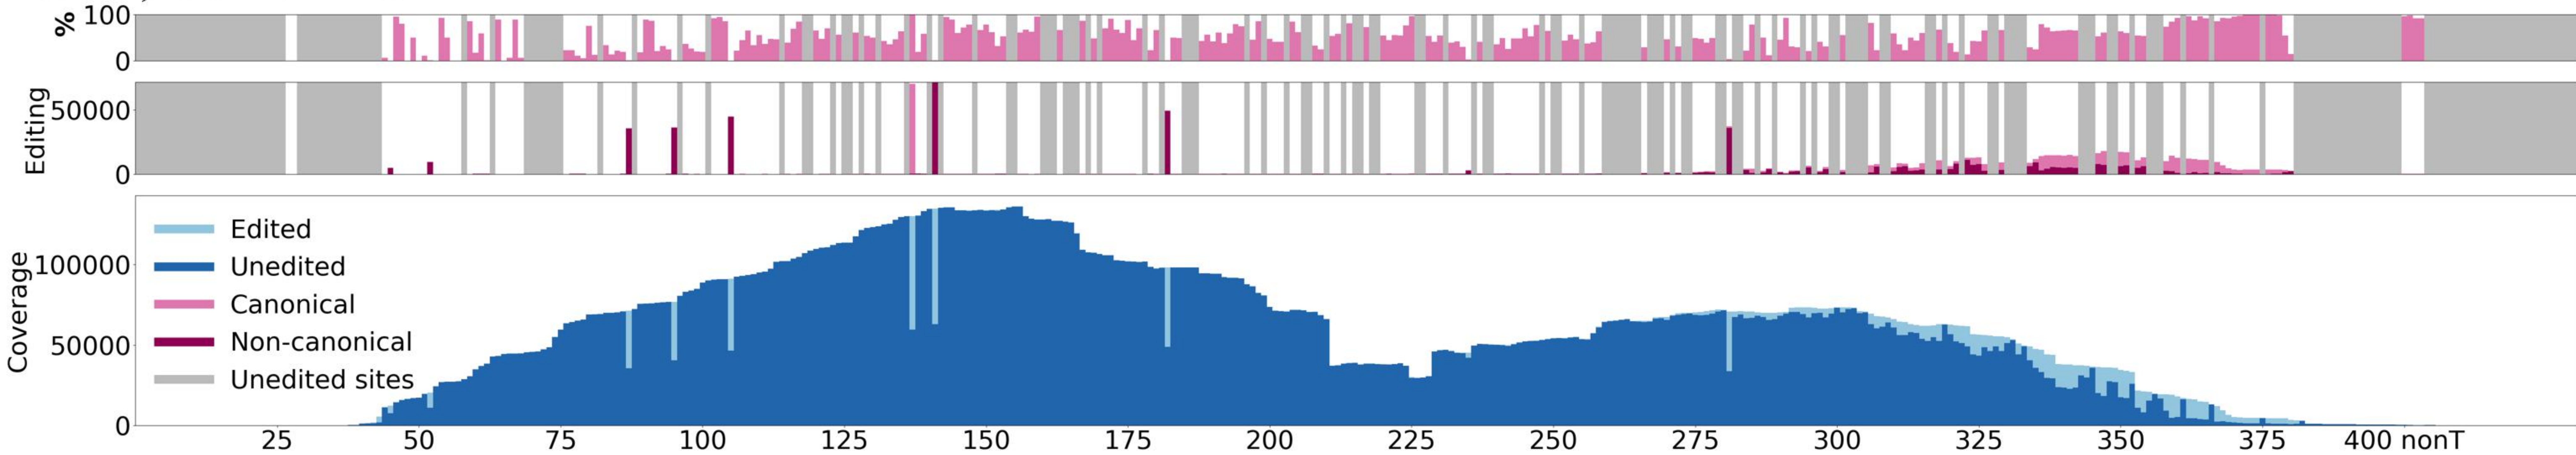

# SYL, CO3 : total

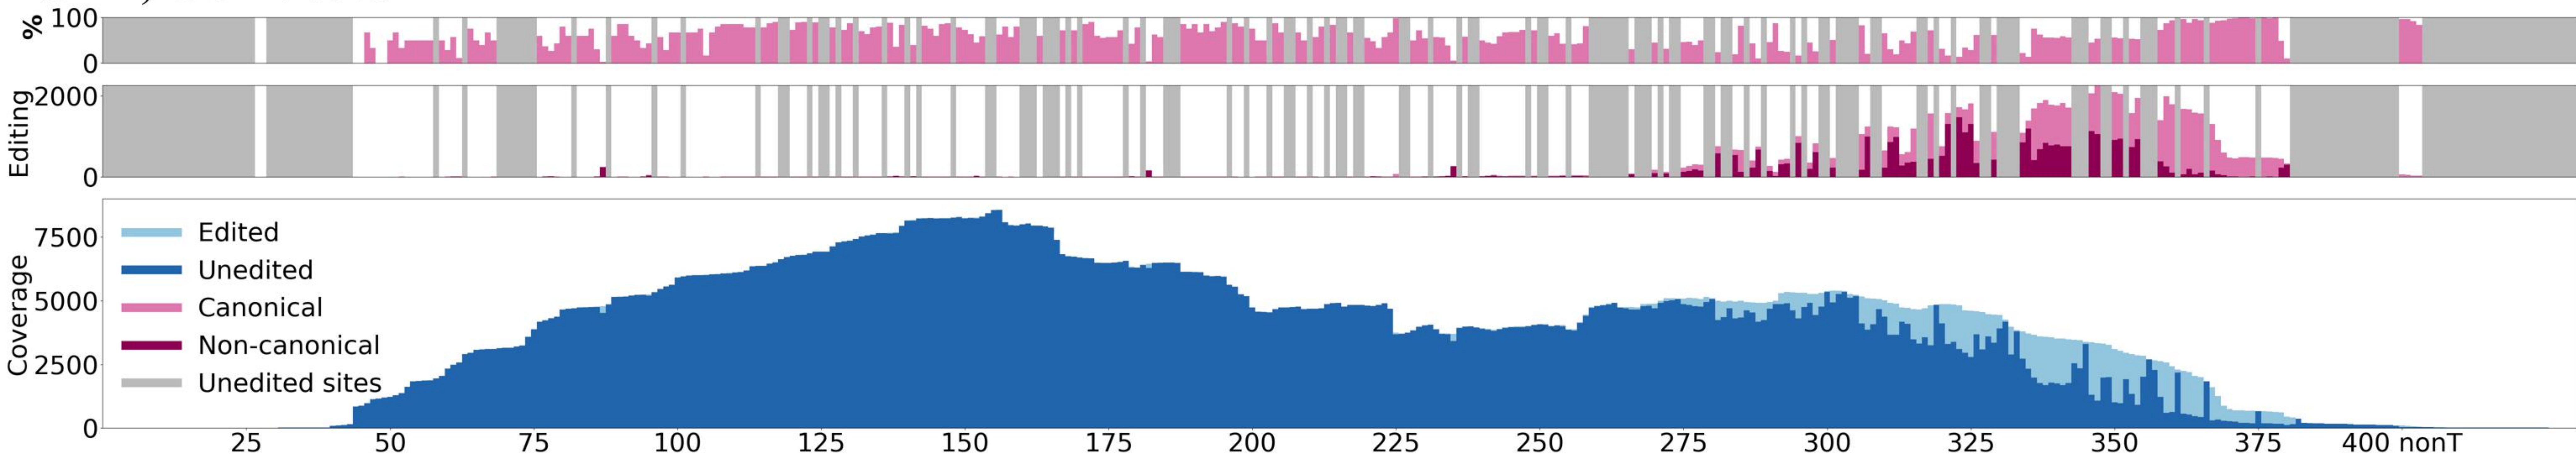

# SYL, CO3 : total

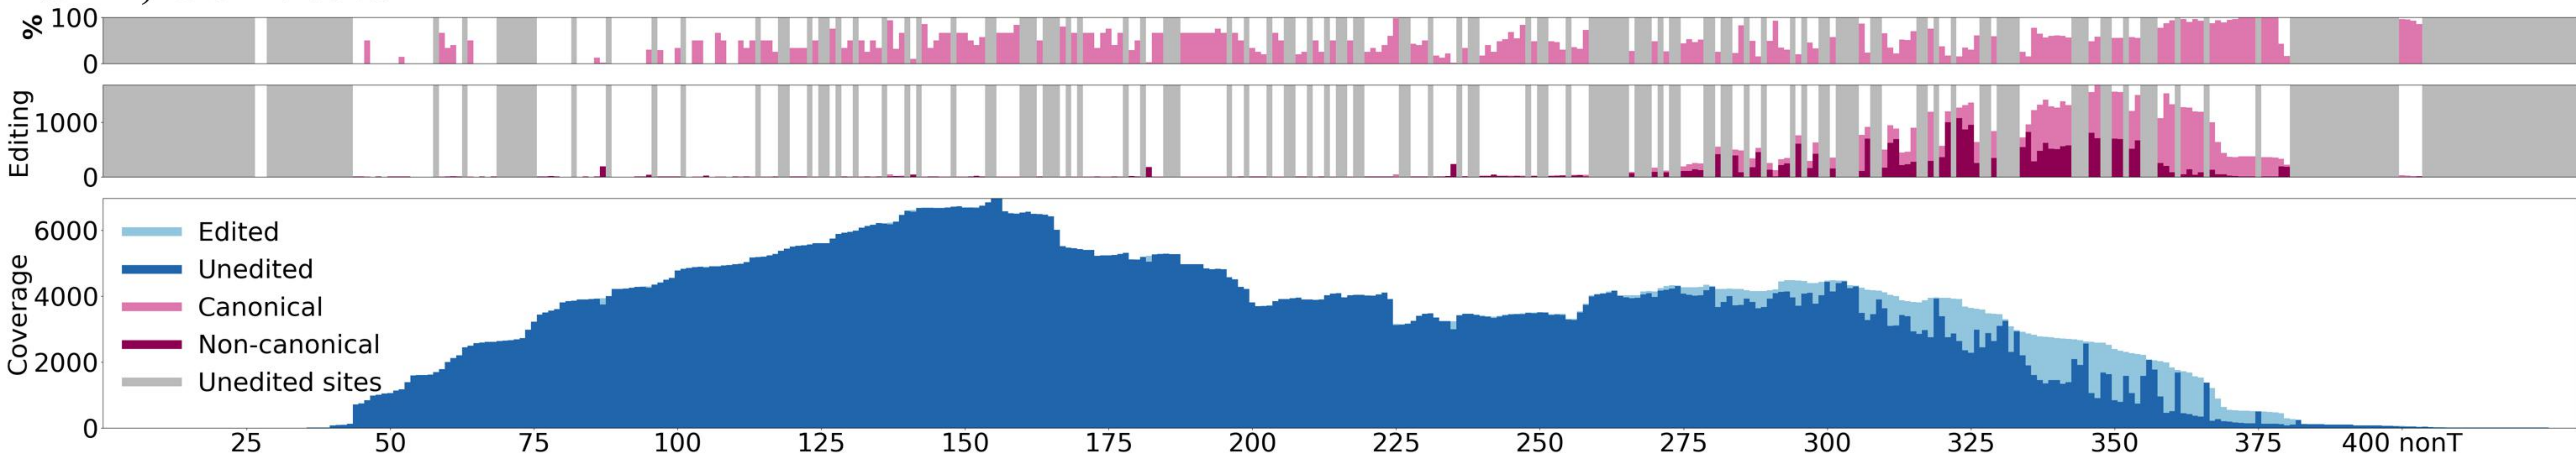

# SYL, CR3 : fed

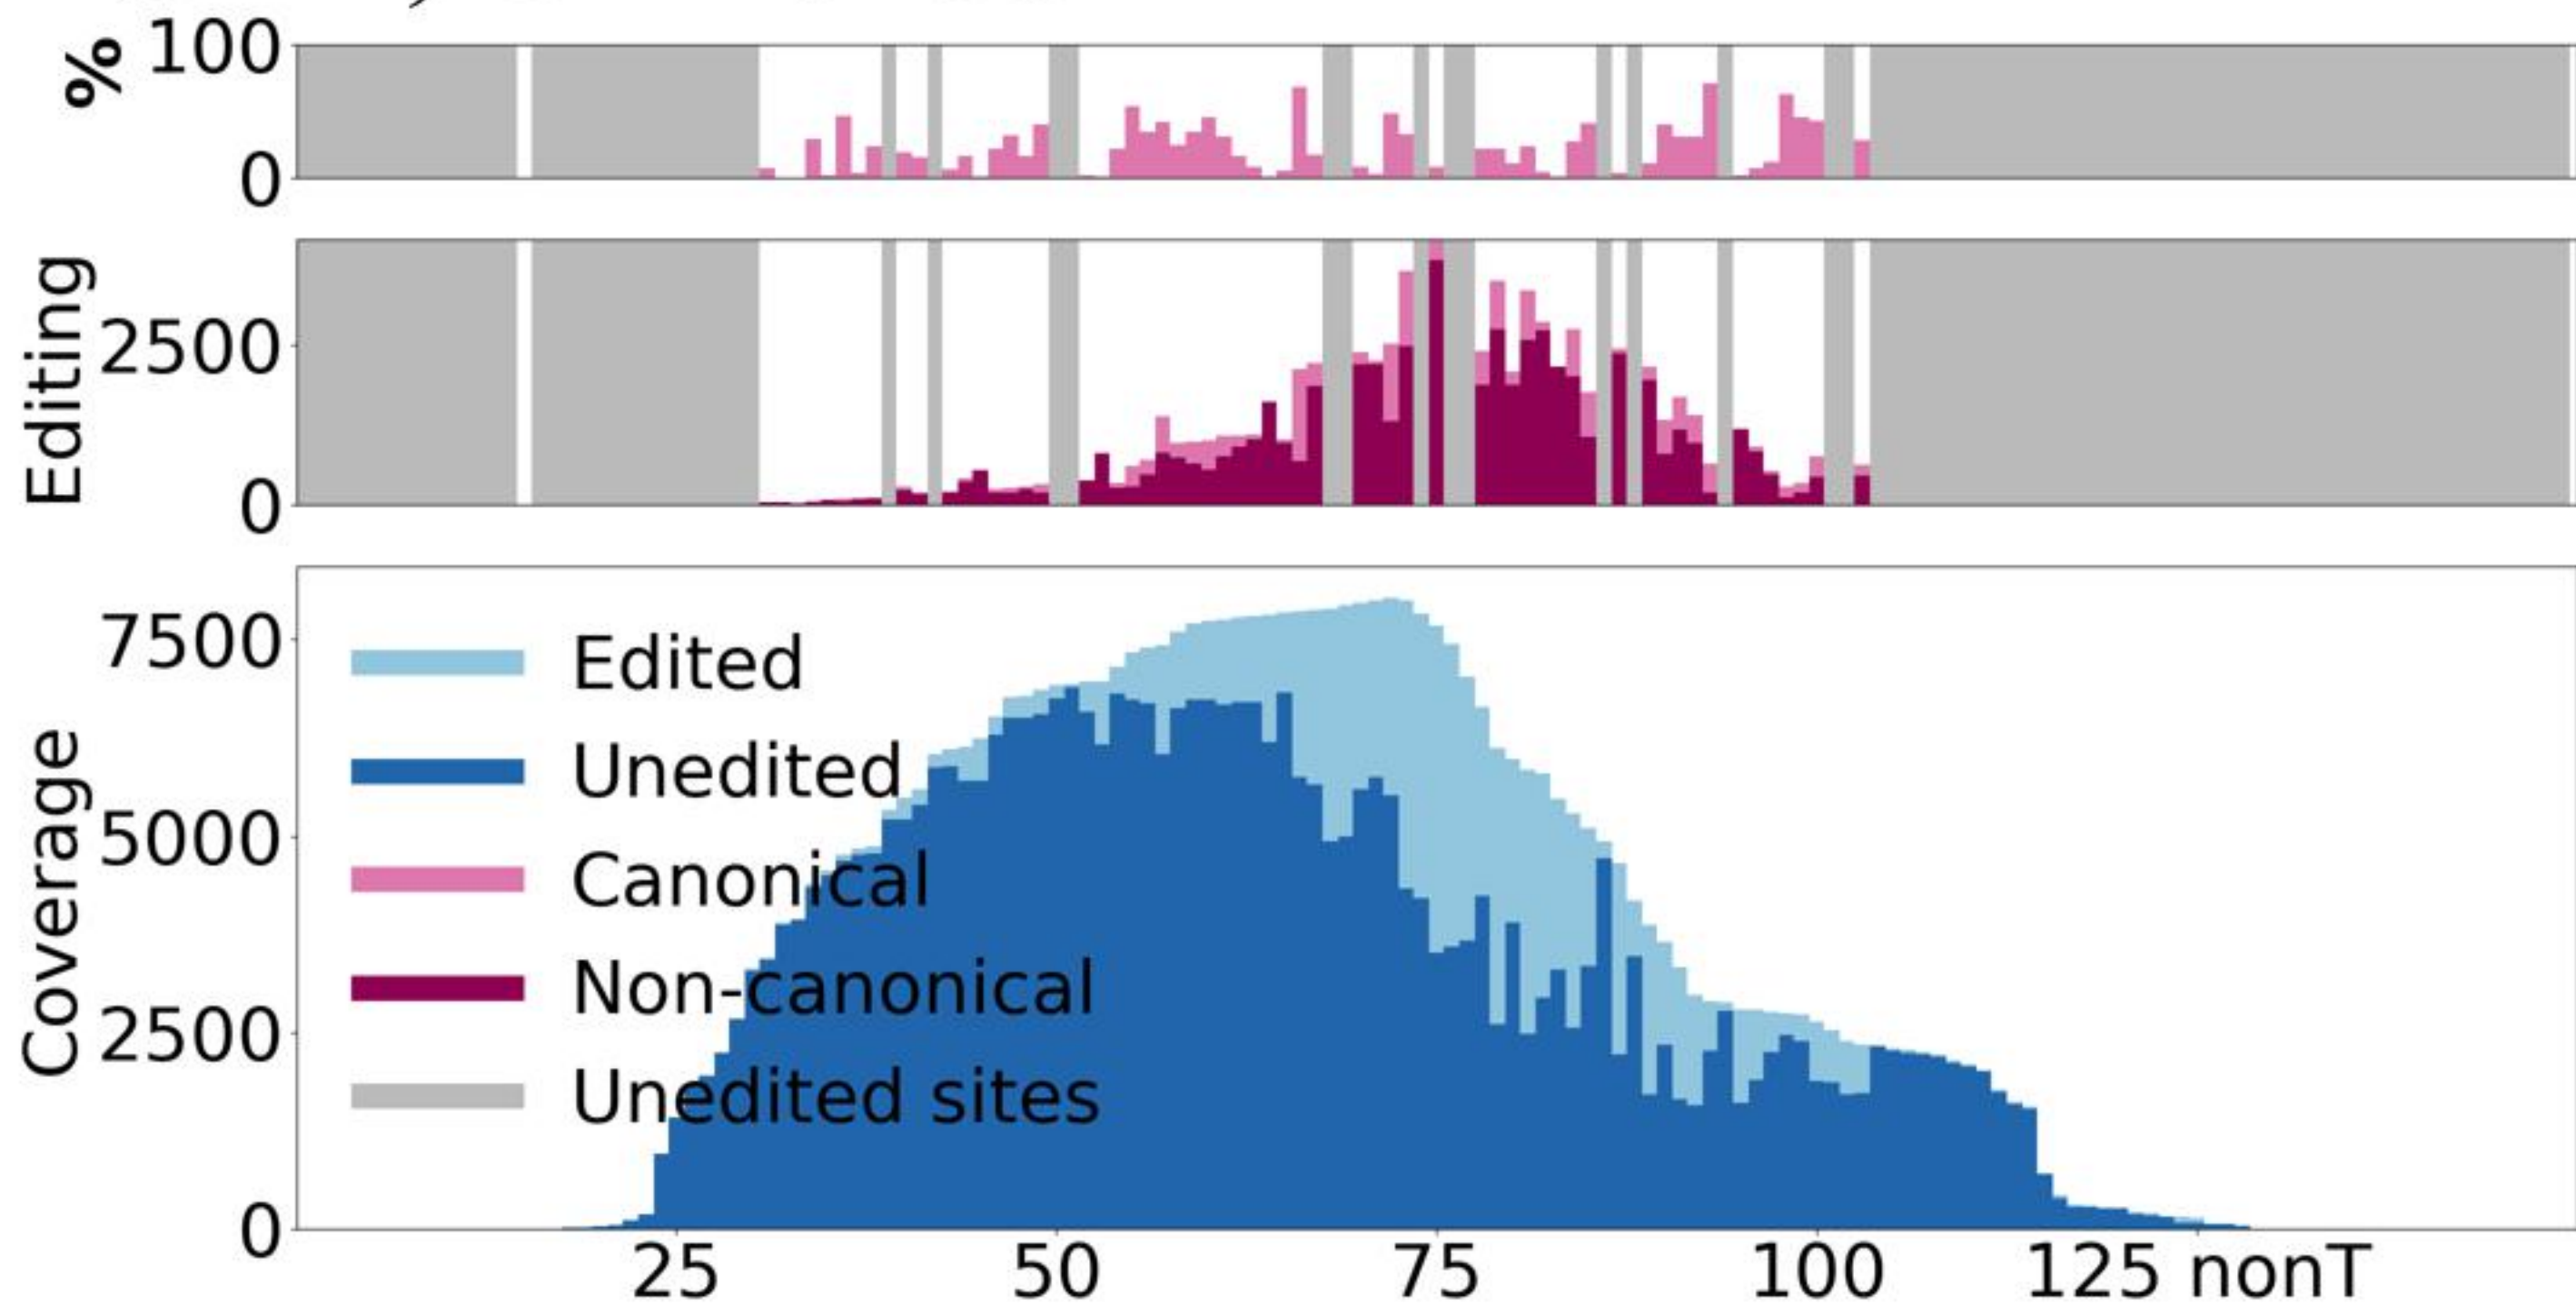

# SYL, CR3 : fed

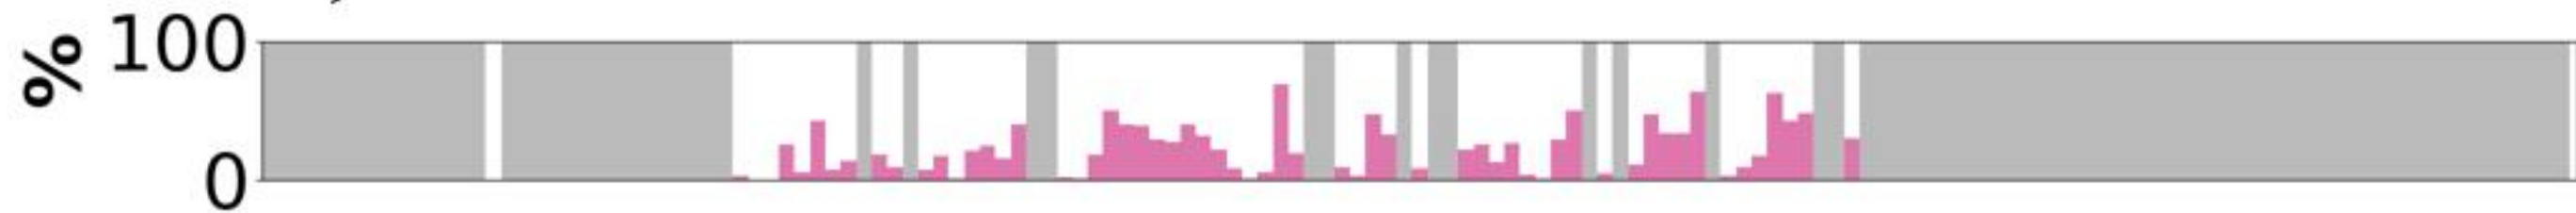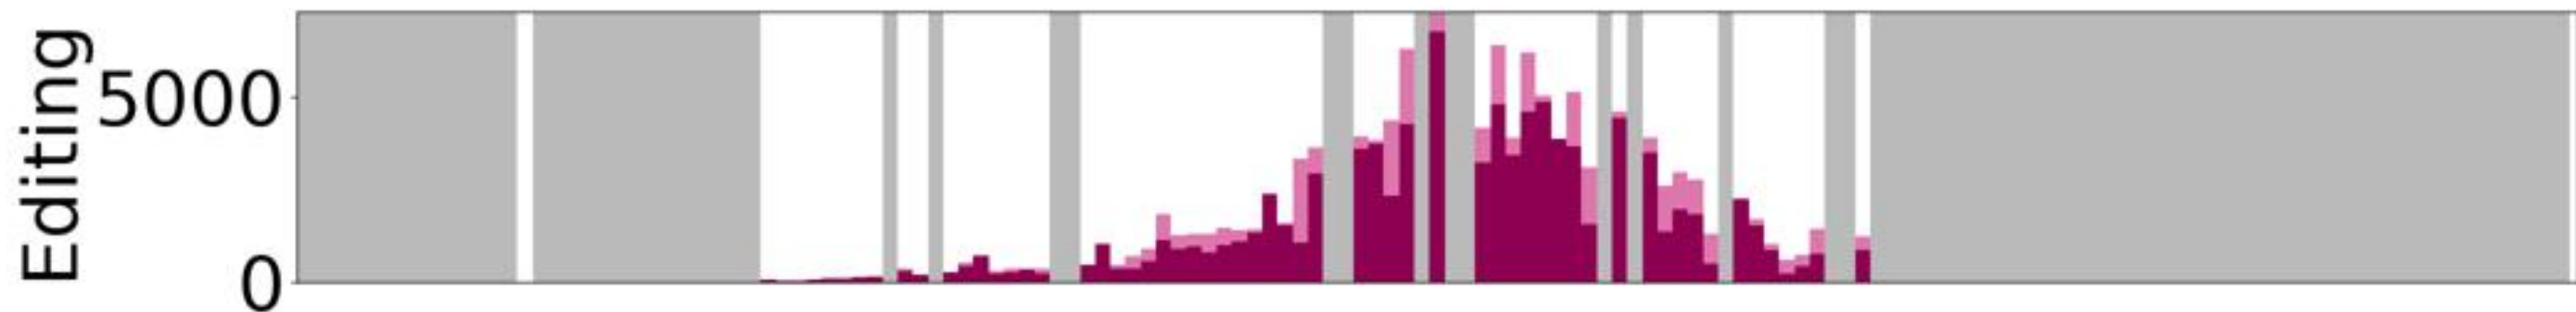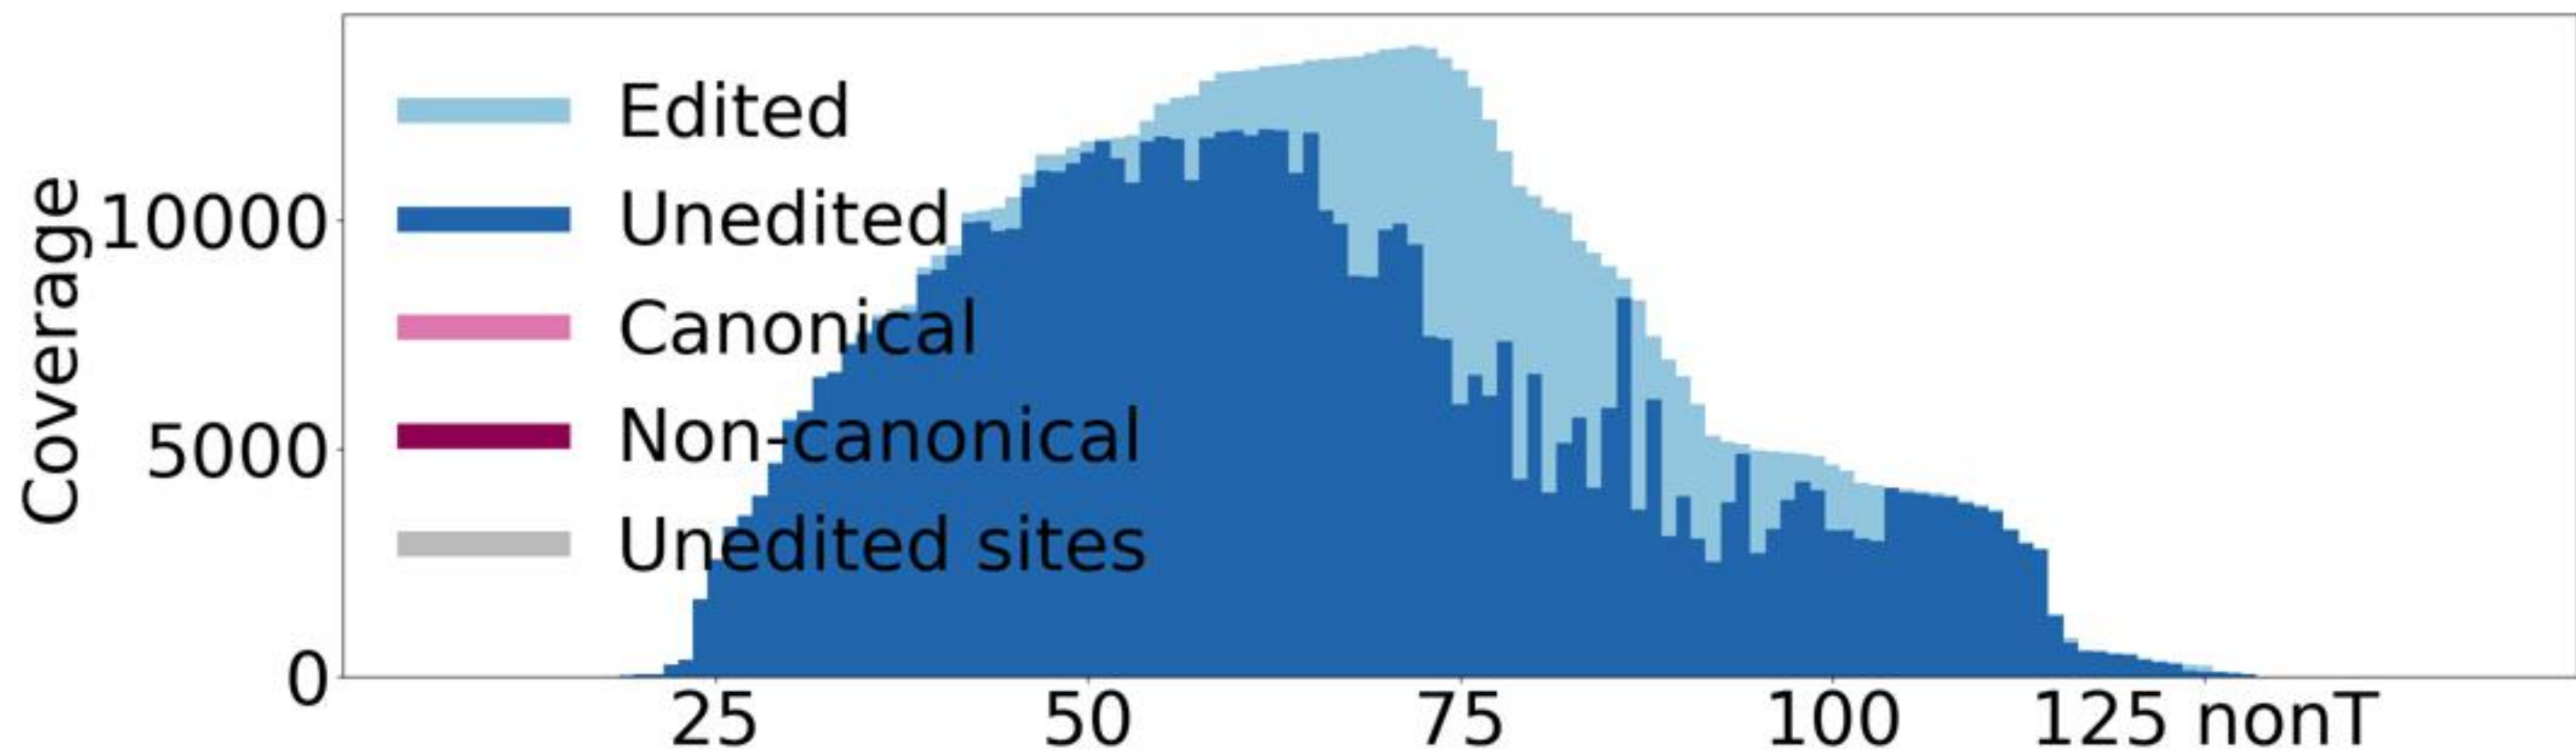

# SYL, CR3 : abrupt

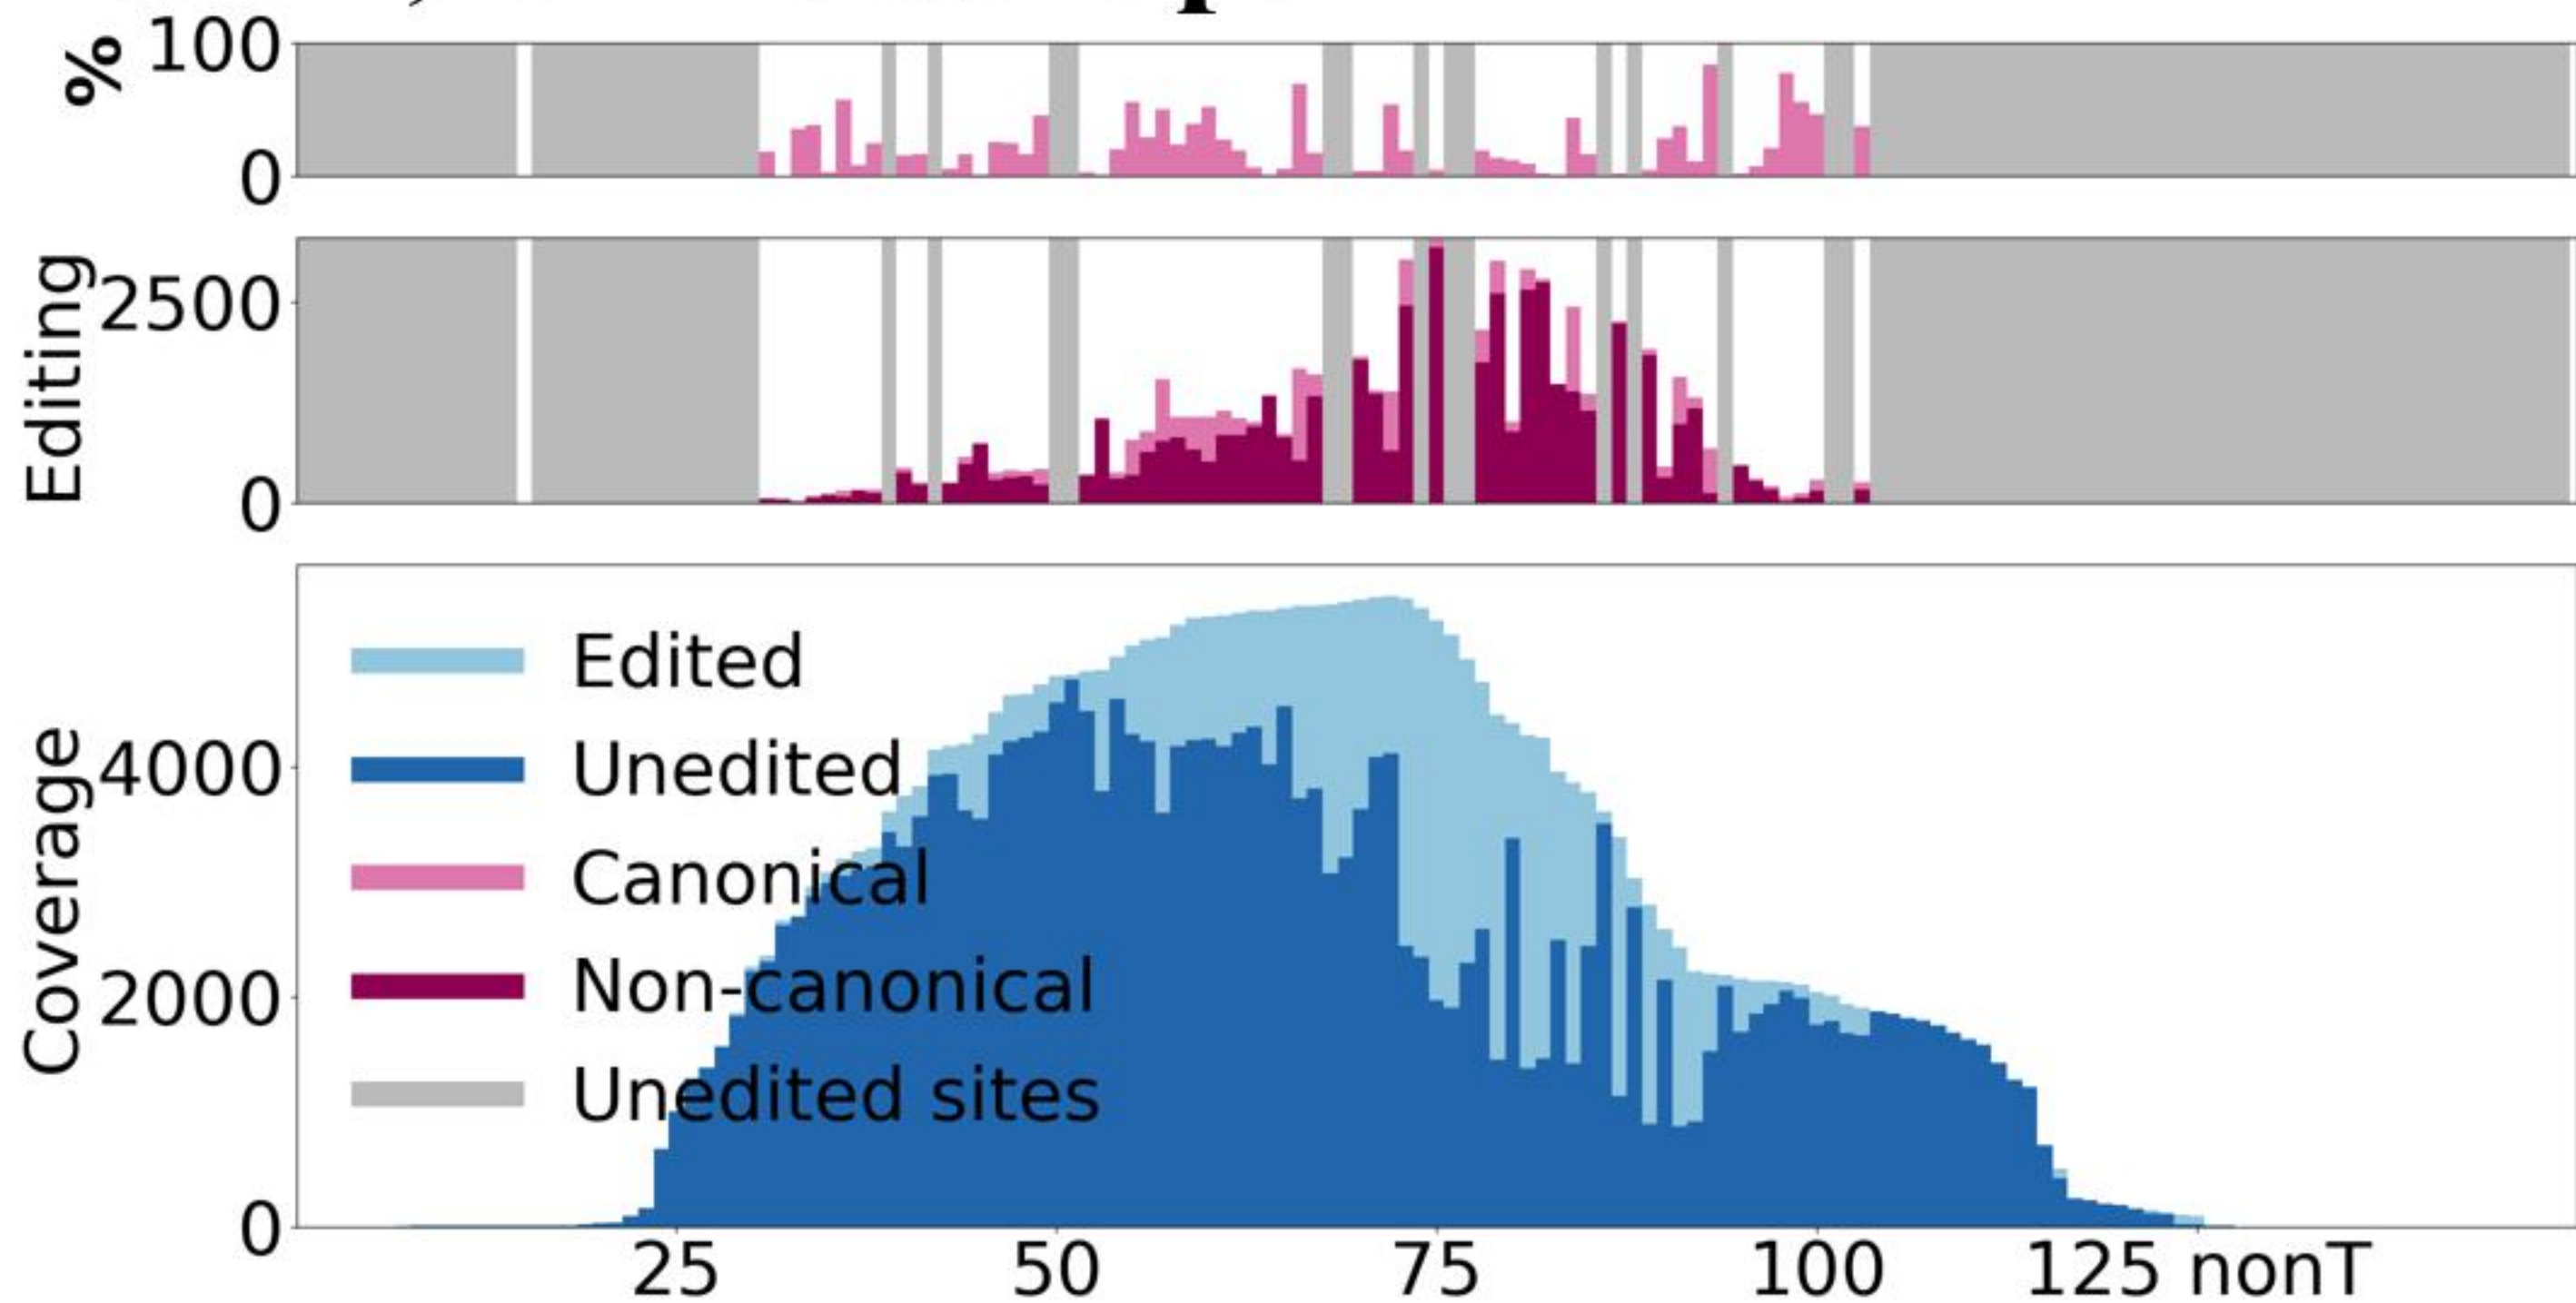

# SYL, CR3 : abrupt

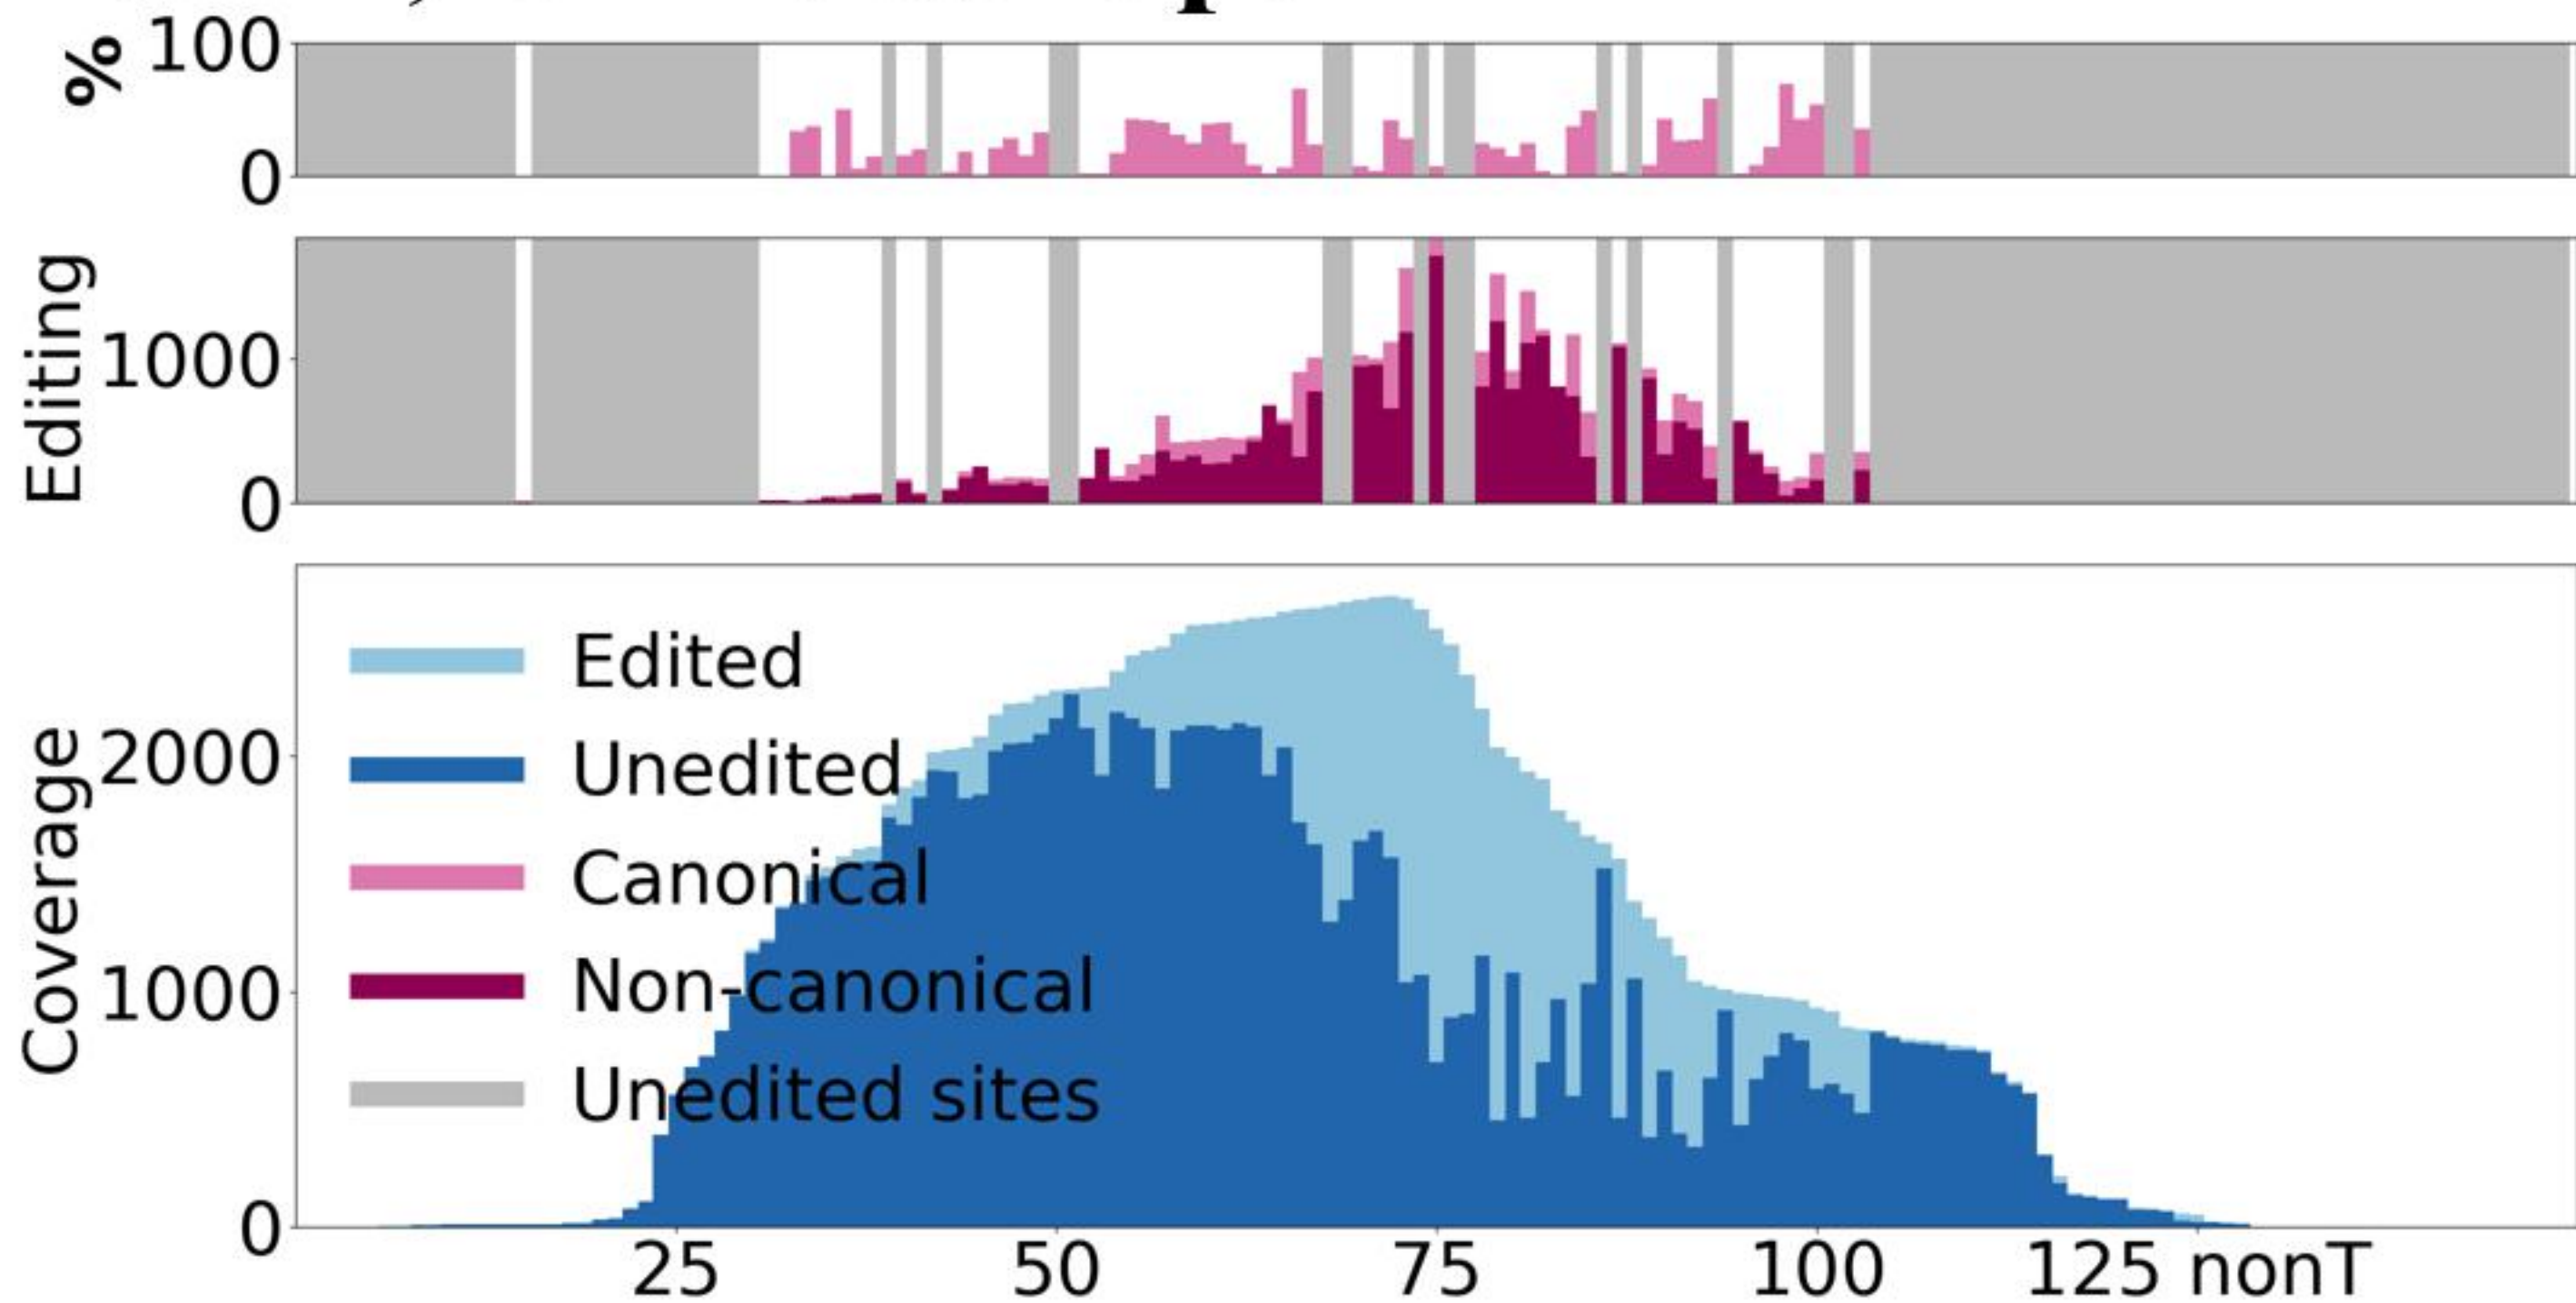

# SYL, CR3 : slow

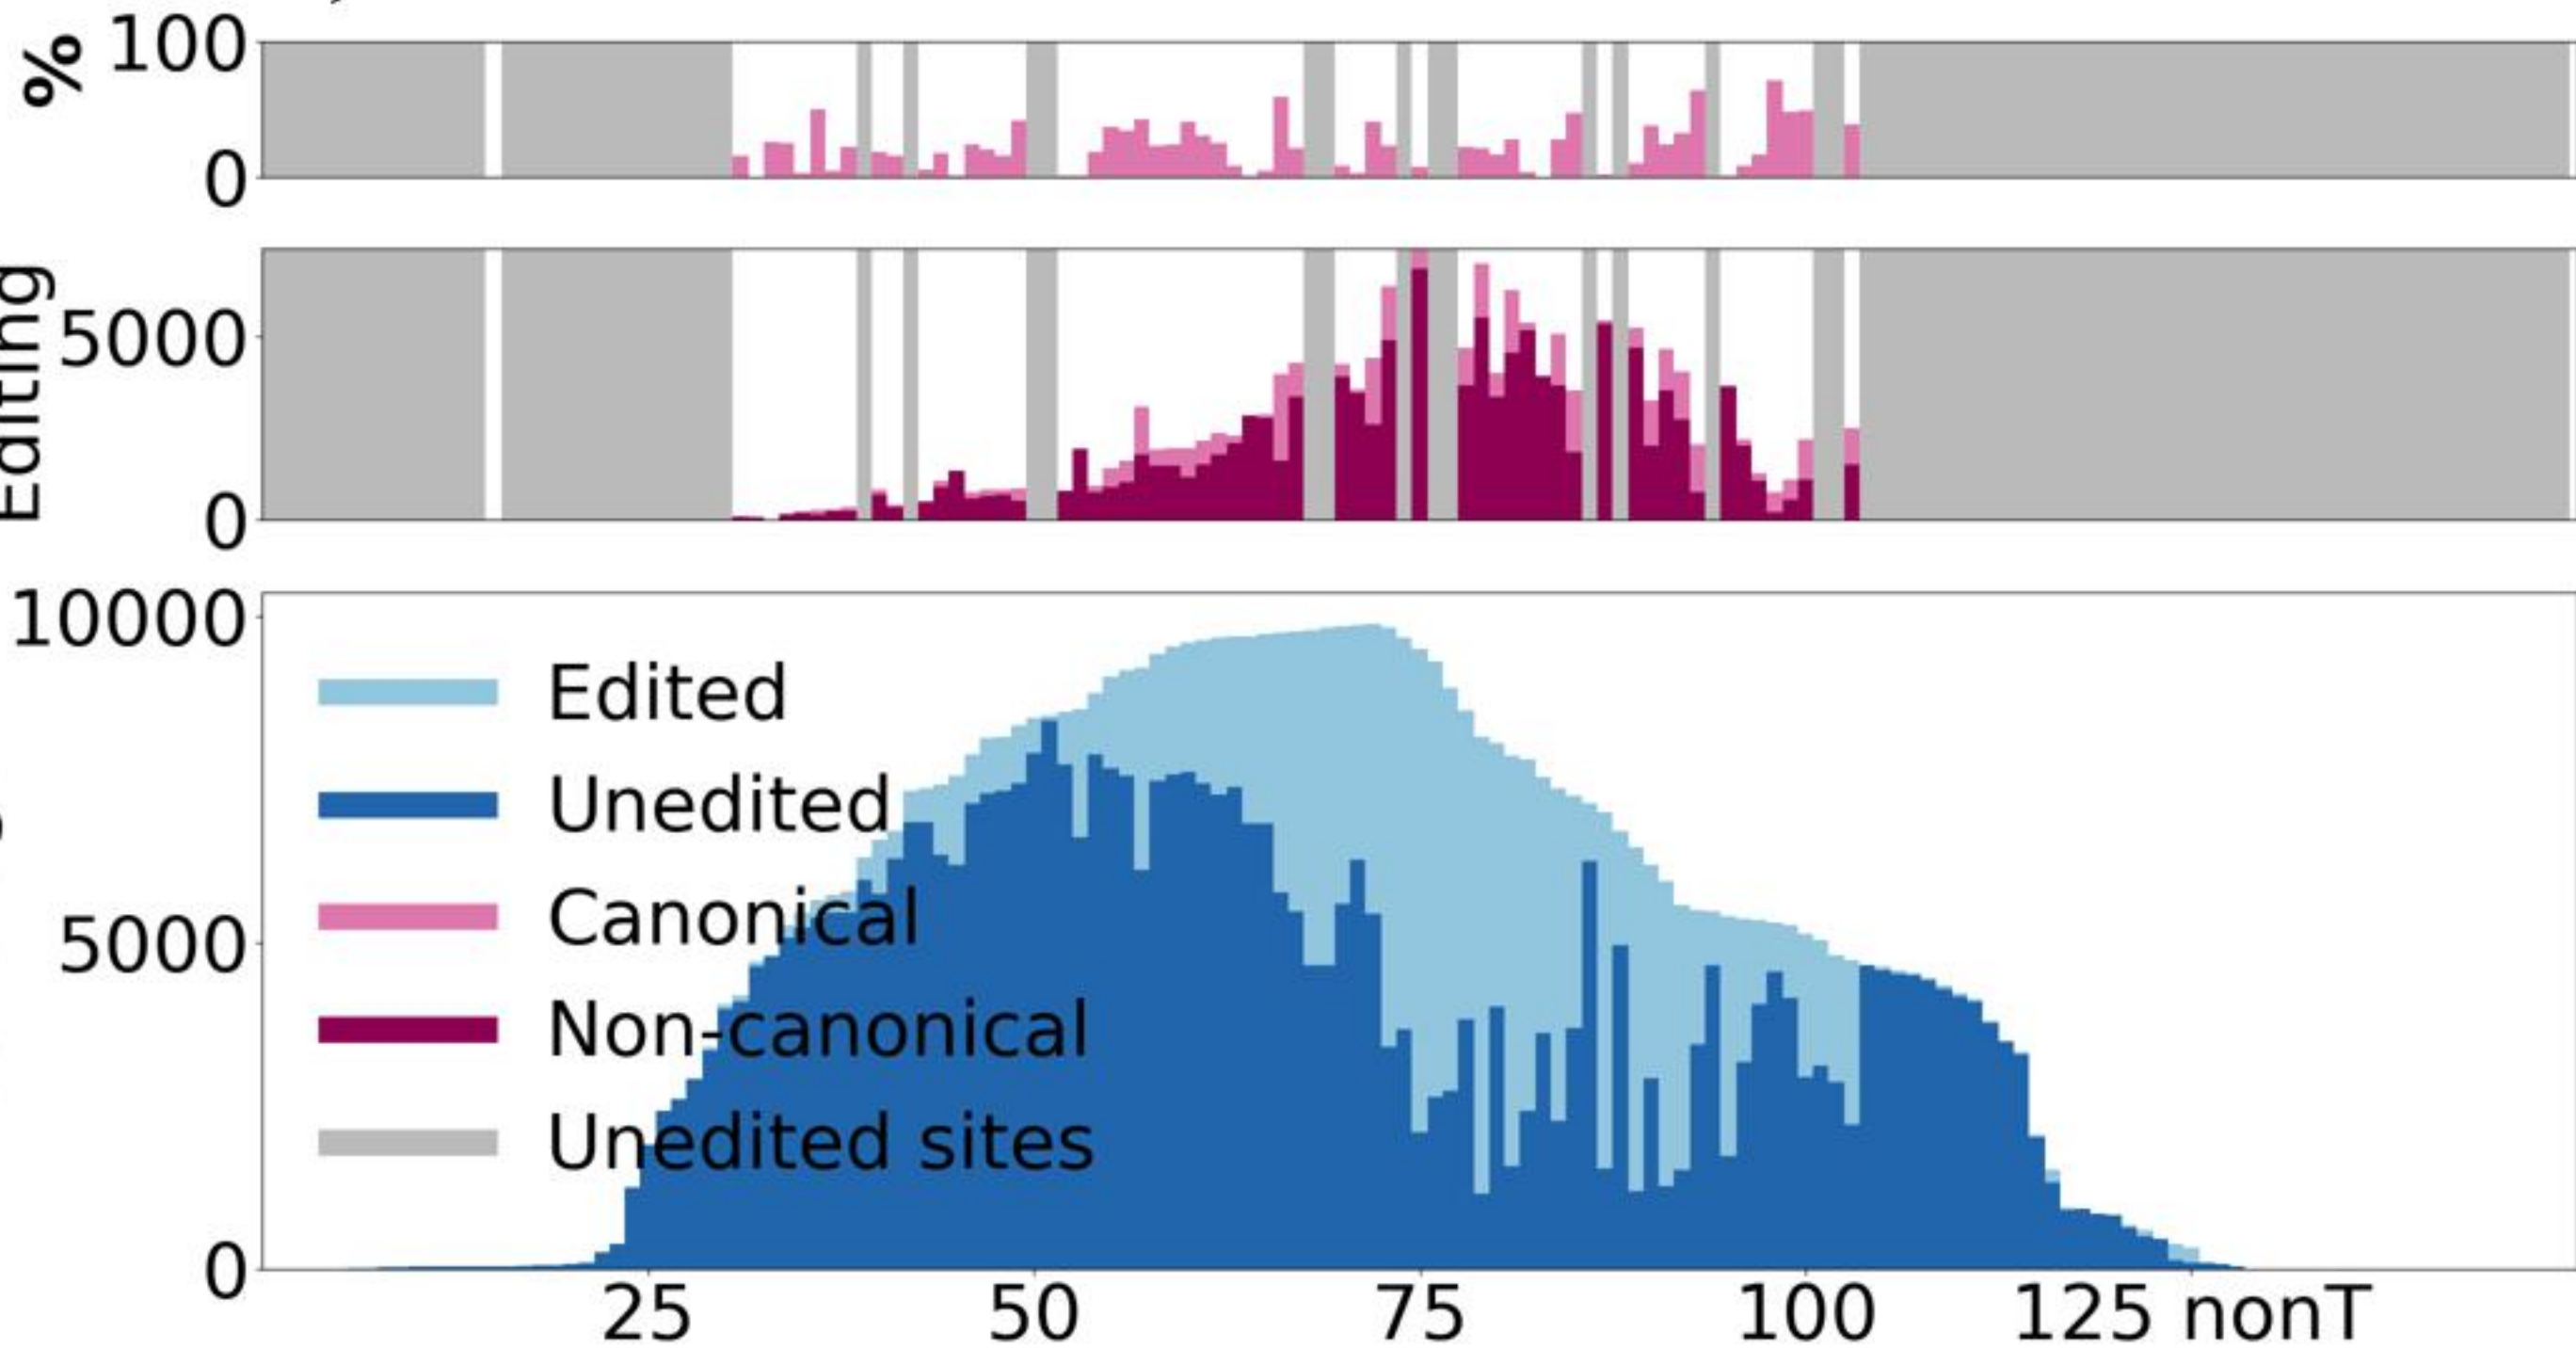

# SYL, CR3 : slow

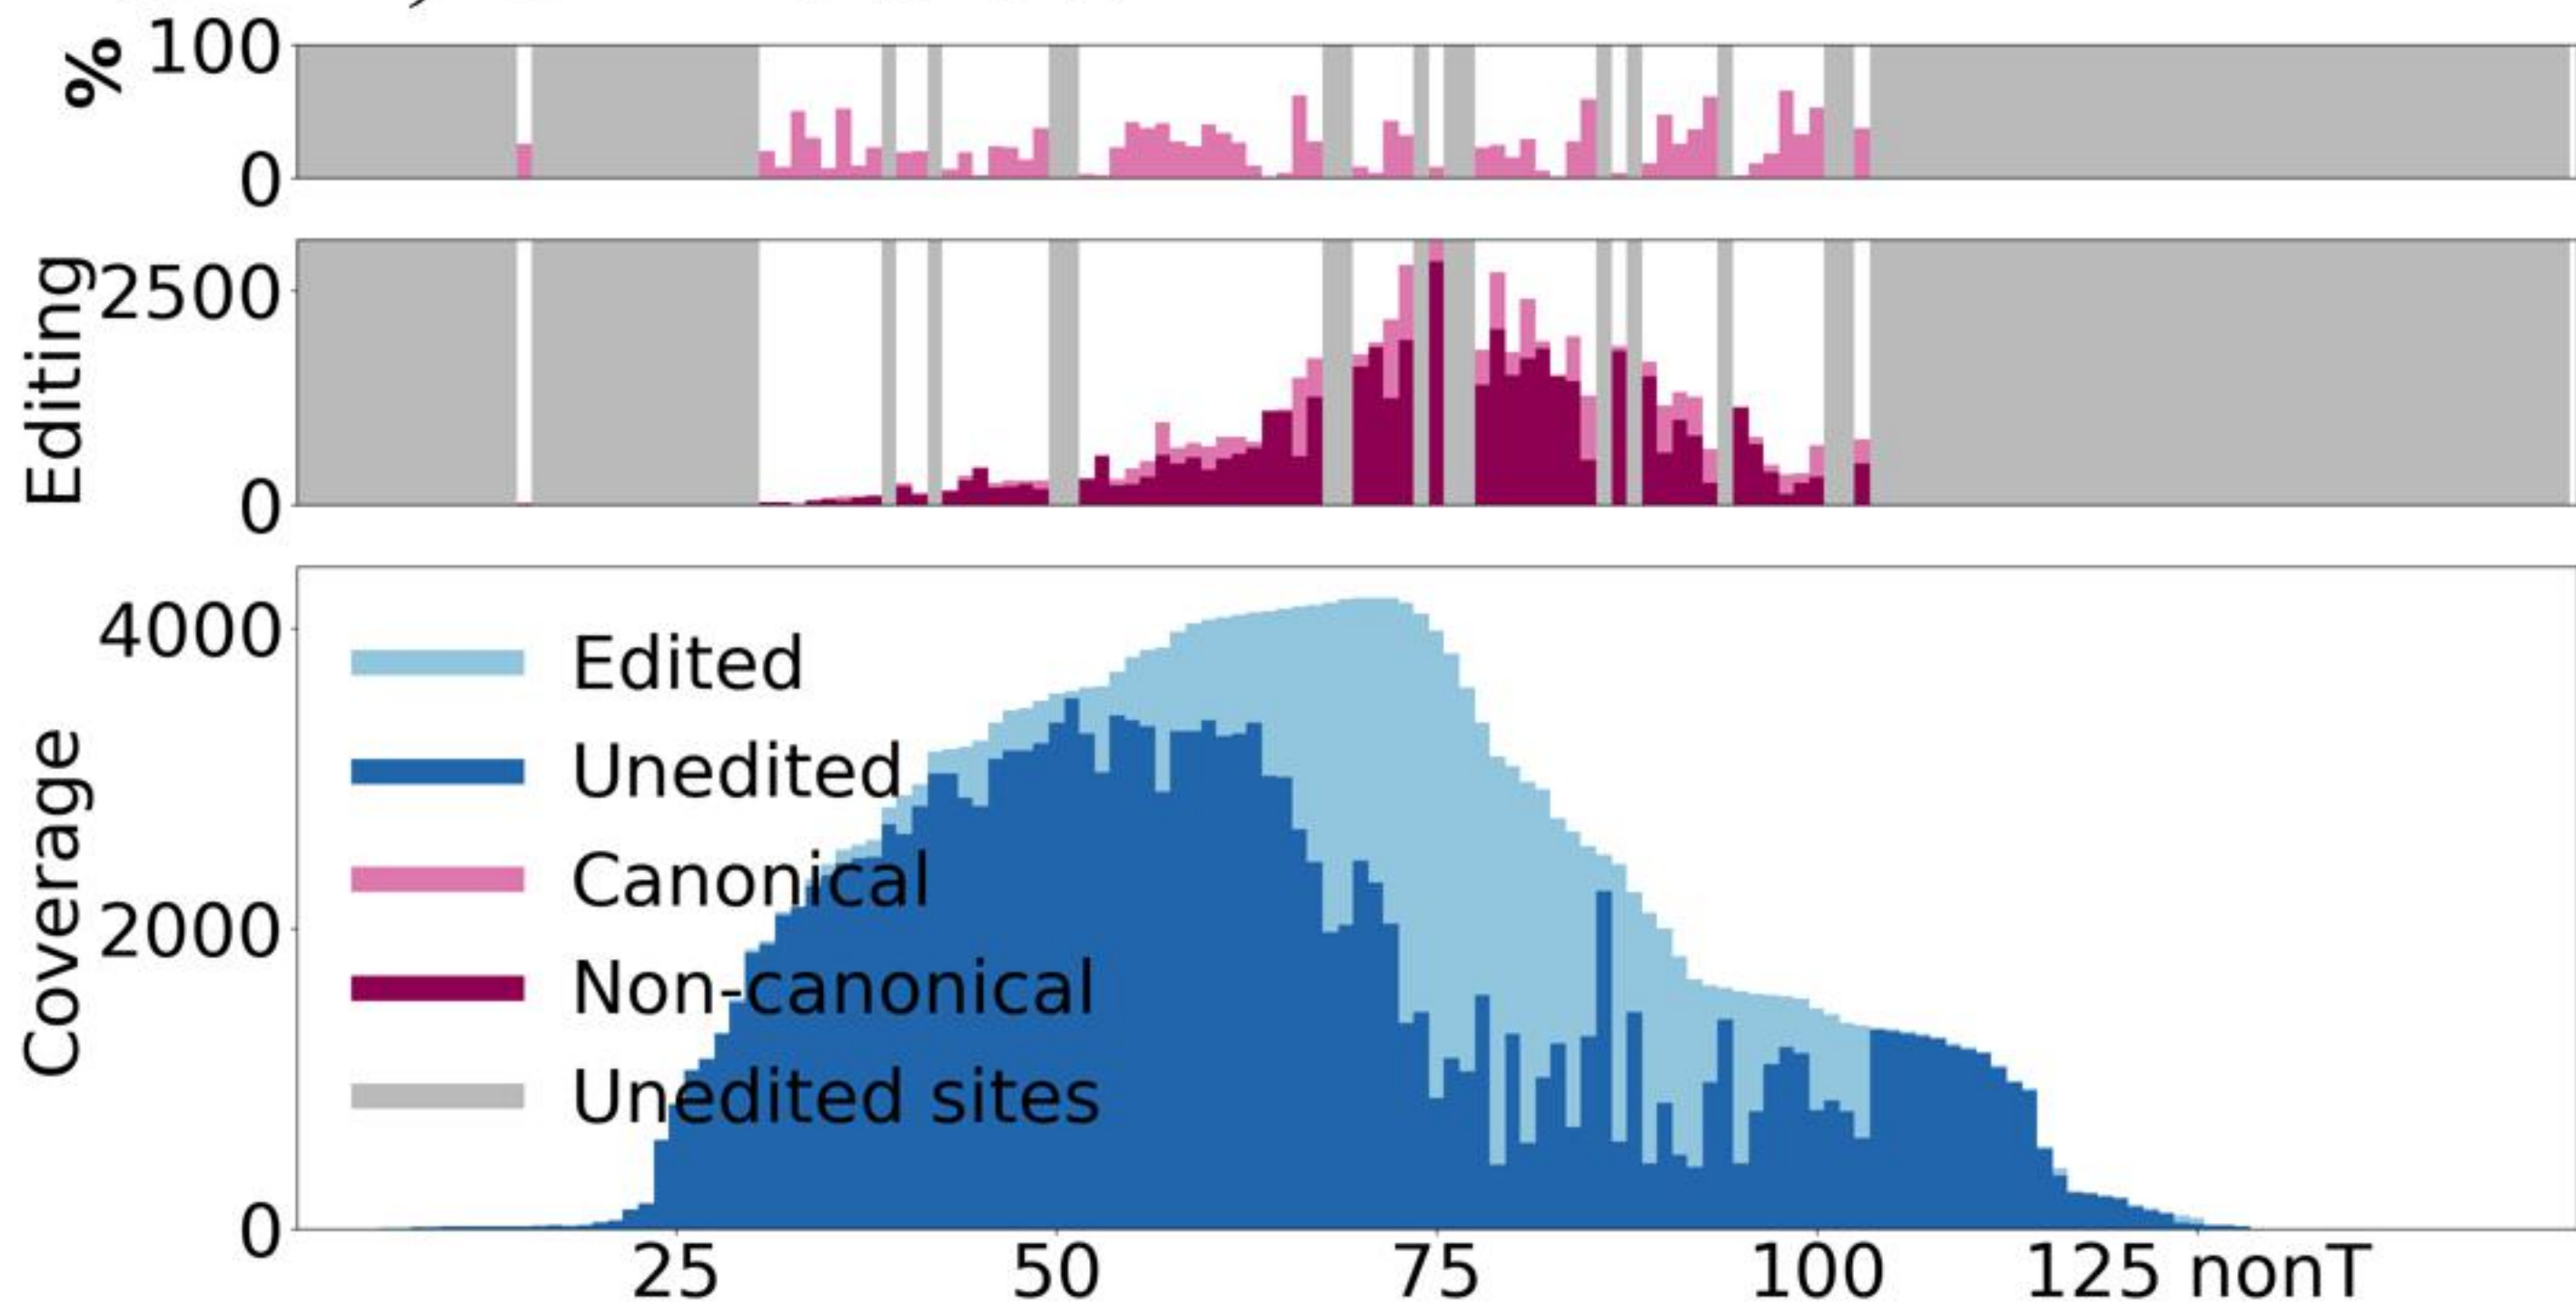

# SYL, CR3 : mito

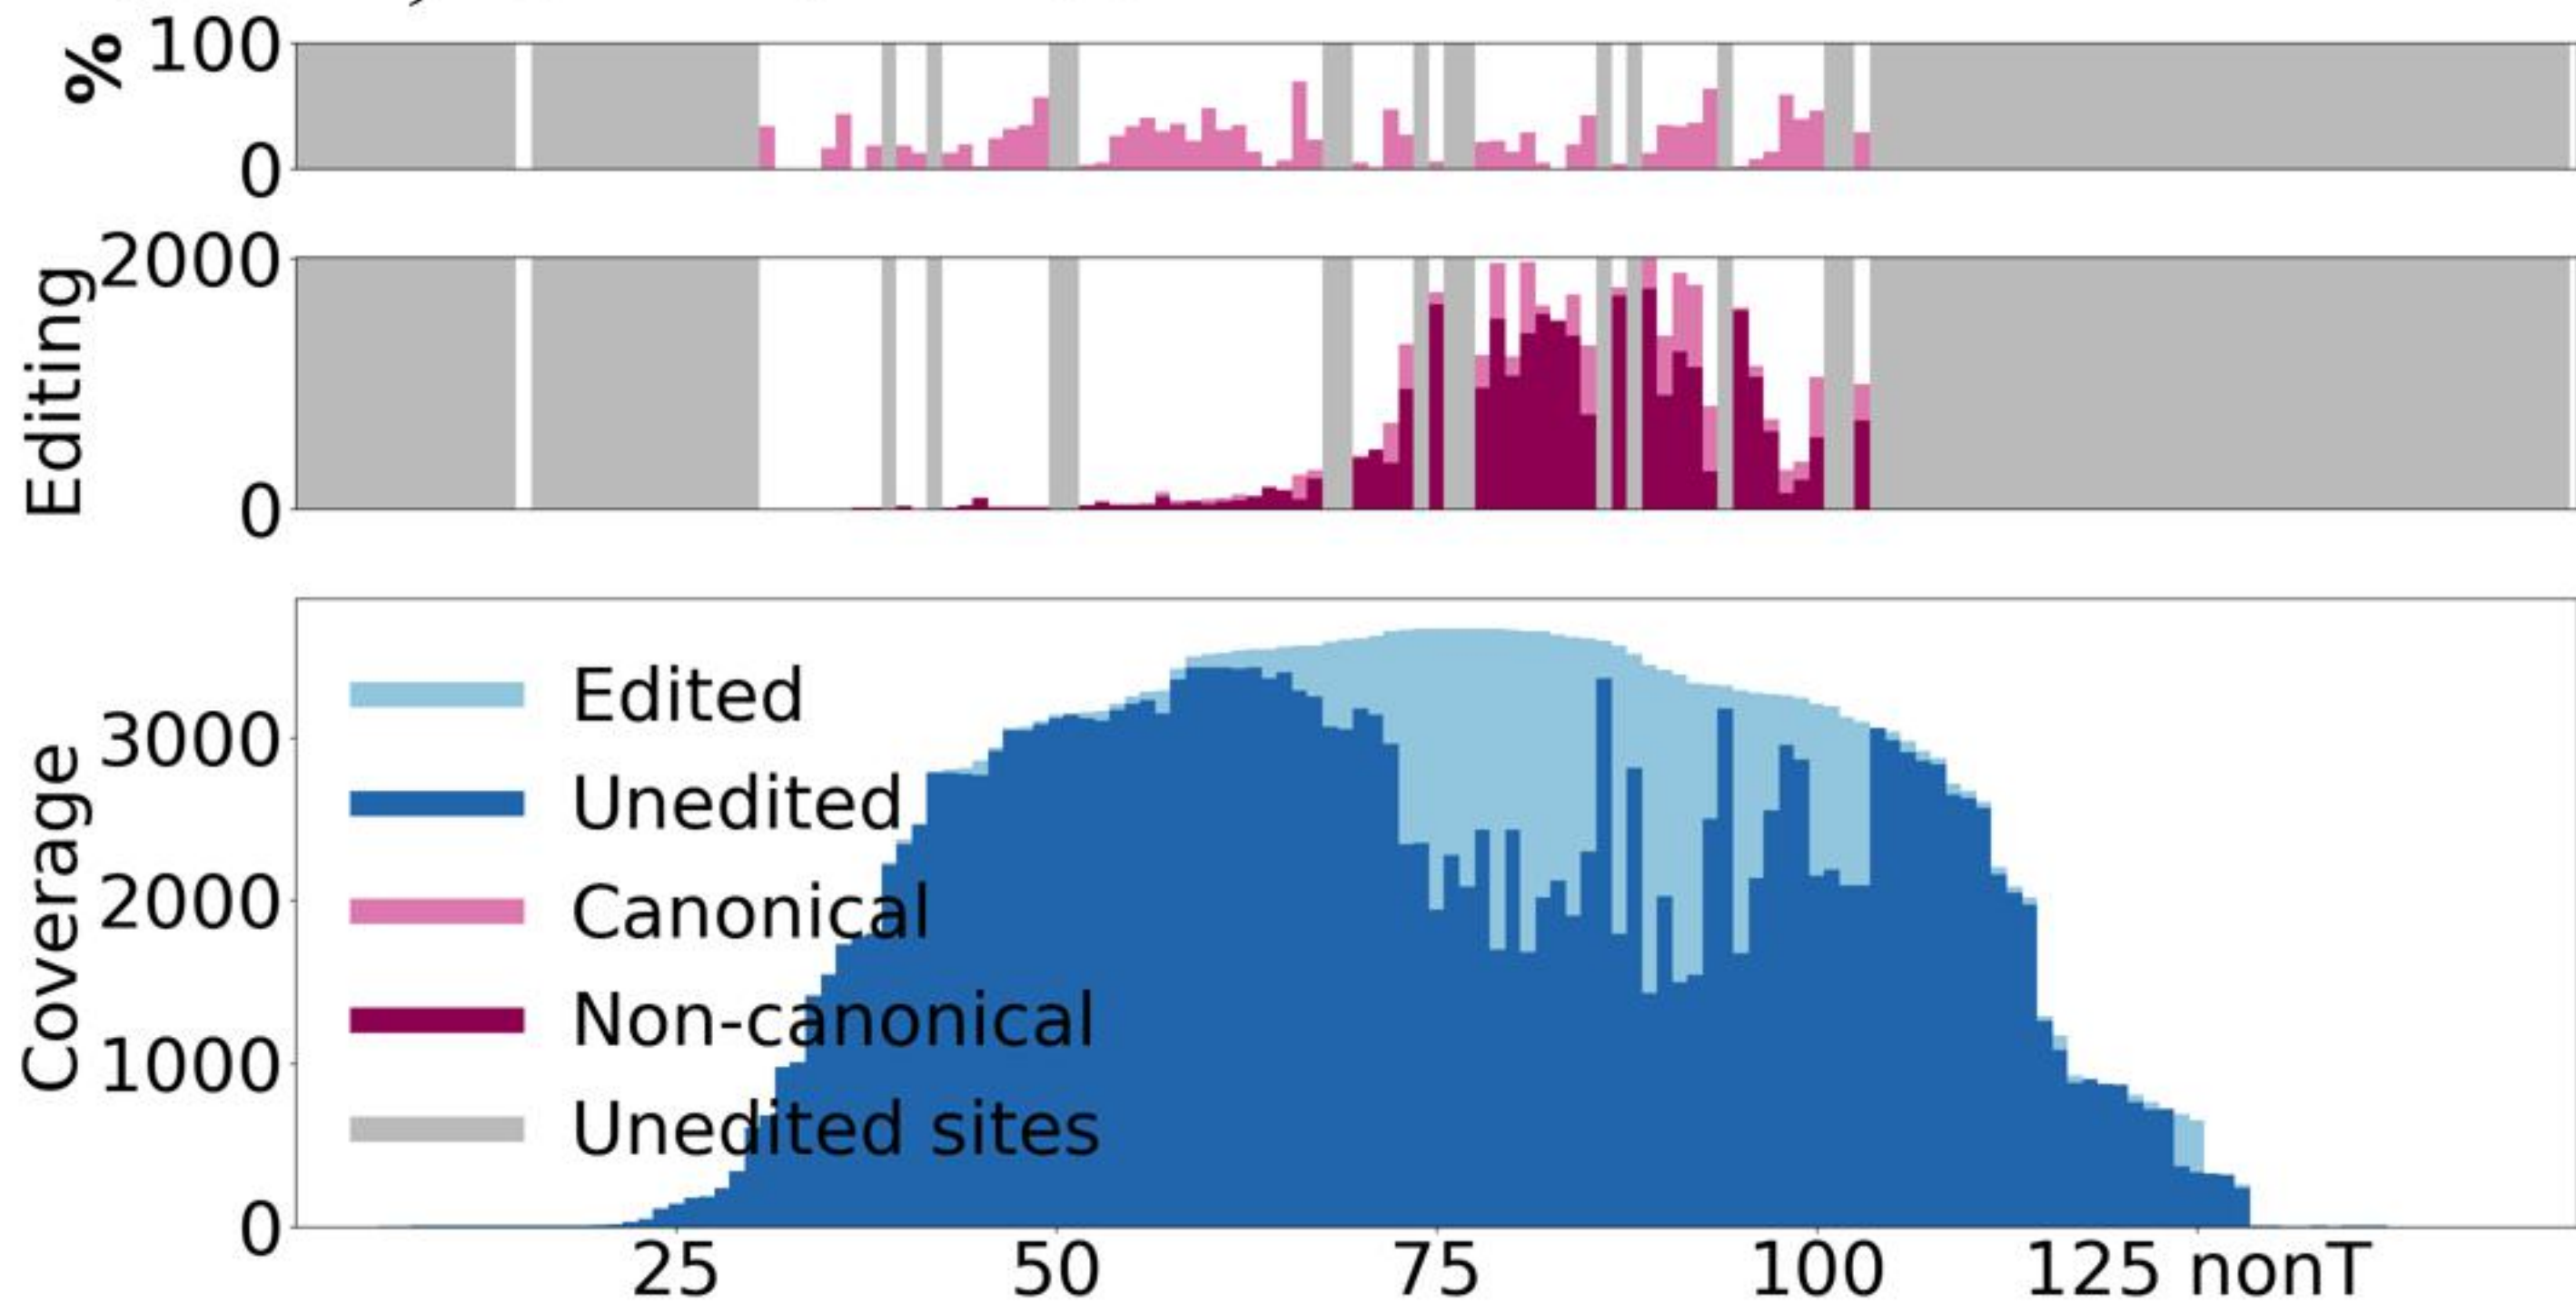

# SYL, CR3 : mito

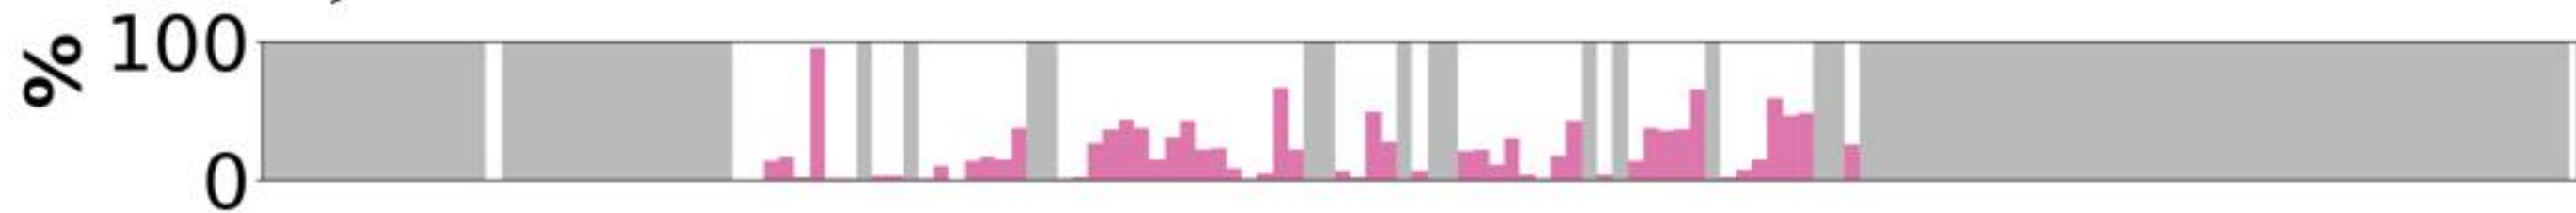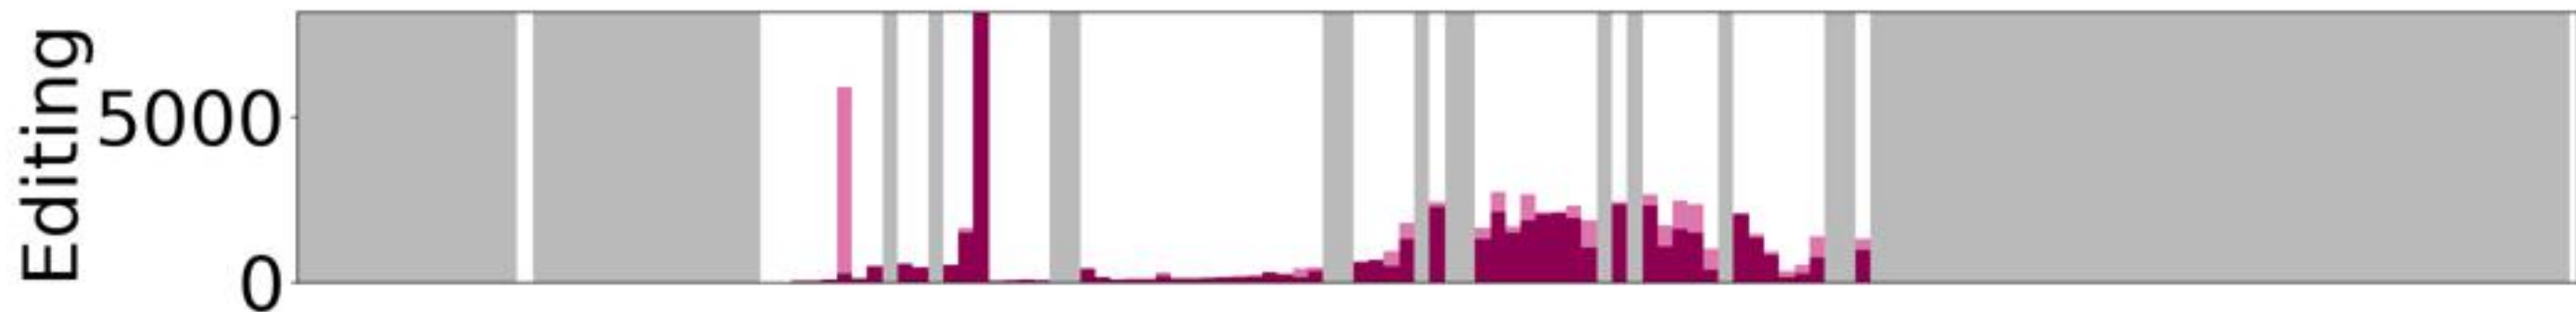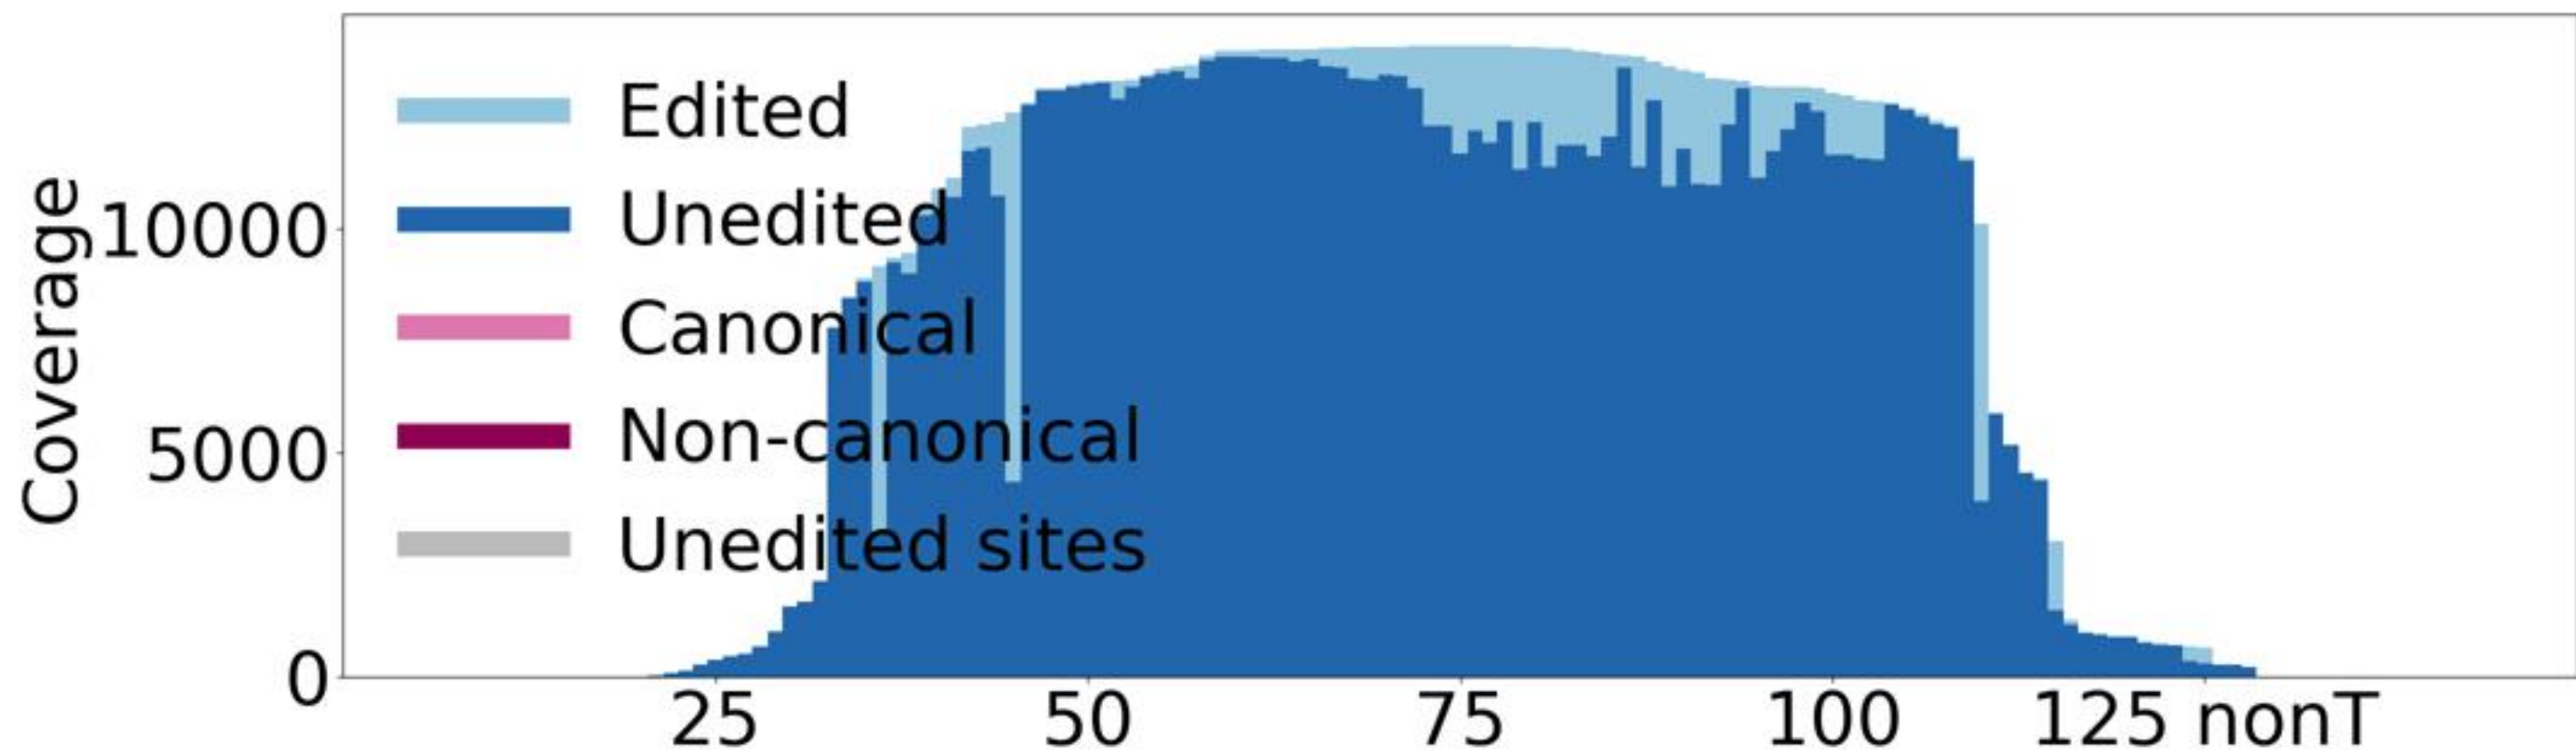

# SYL, CR3 : total

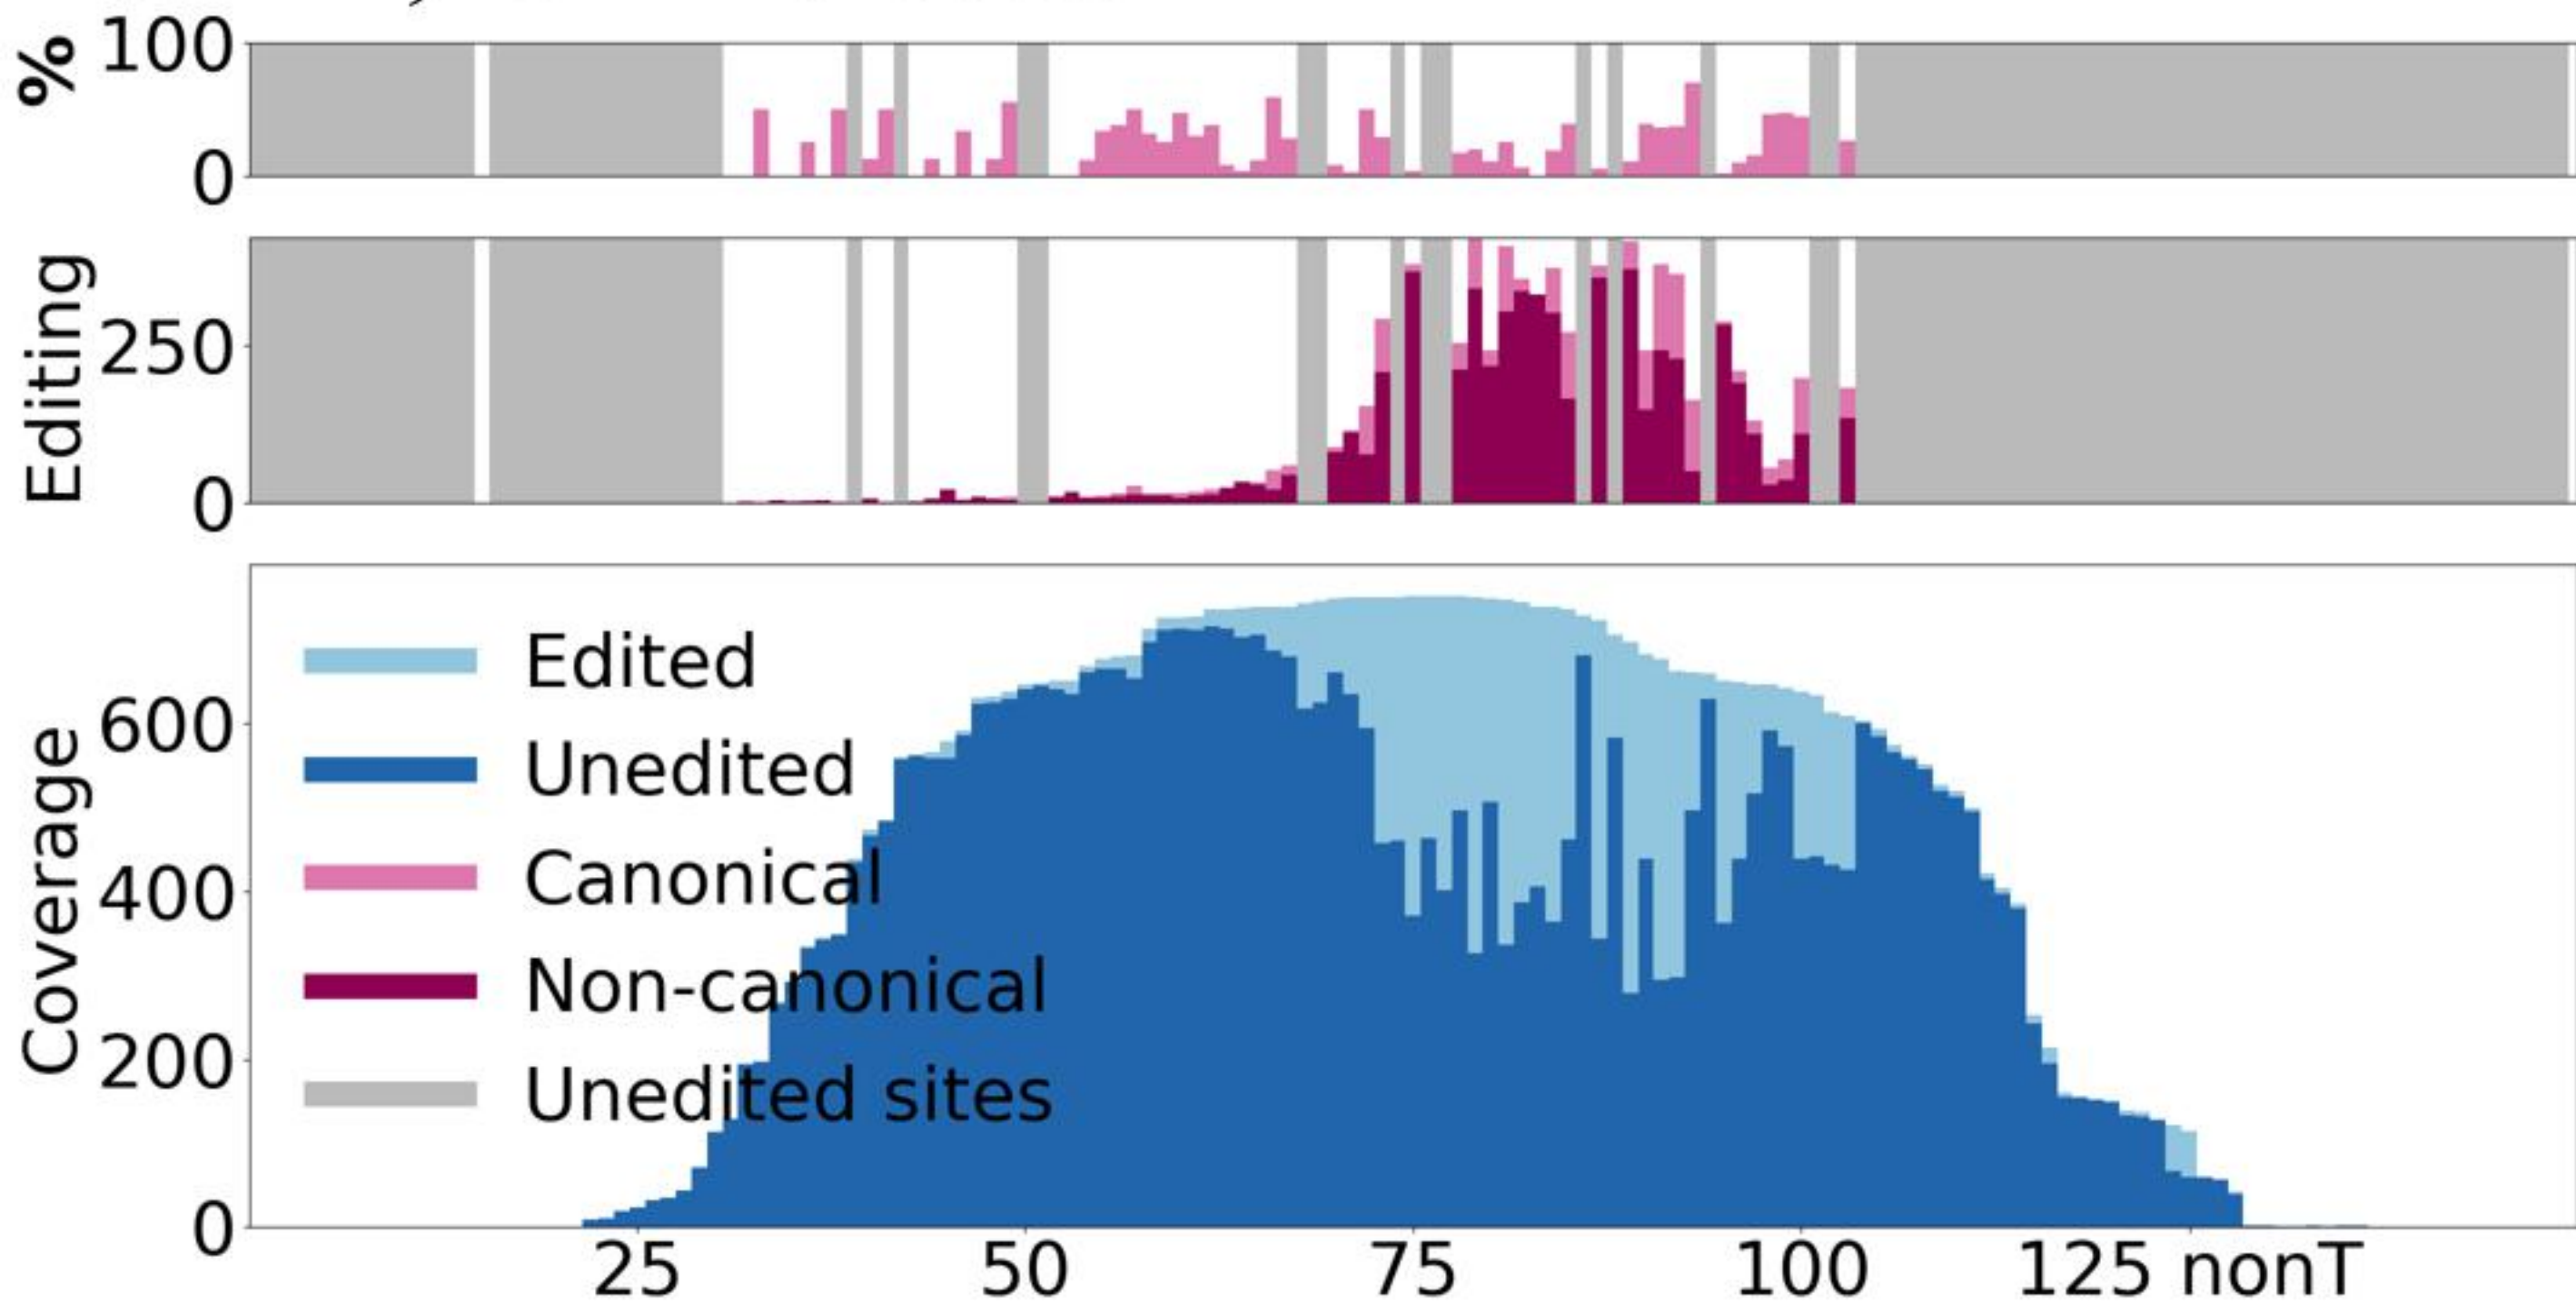

# SYL, CR3 : total

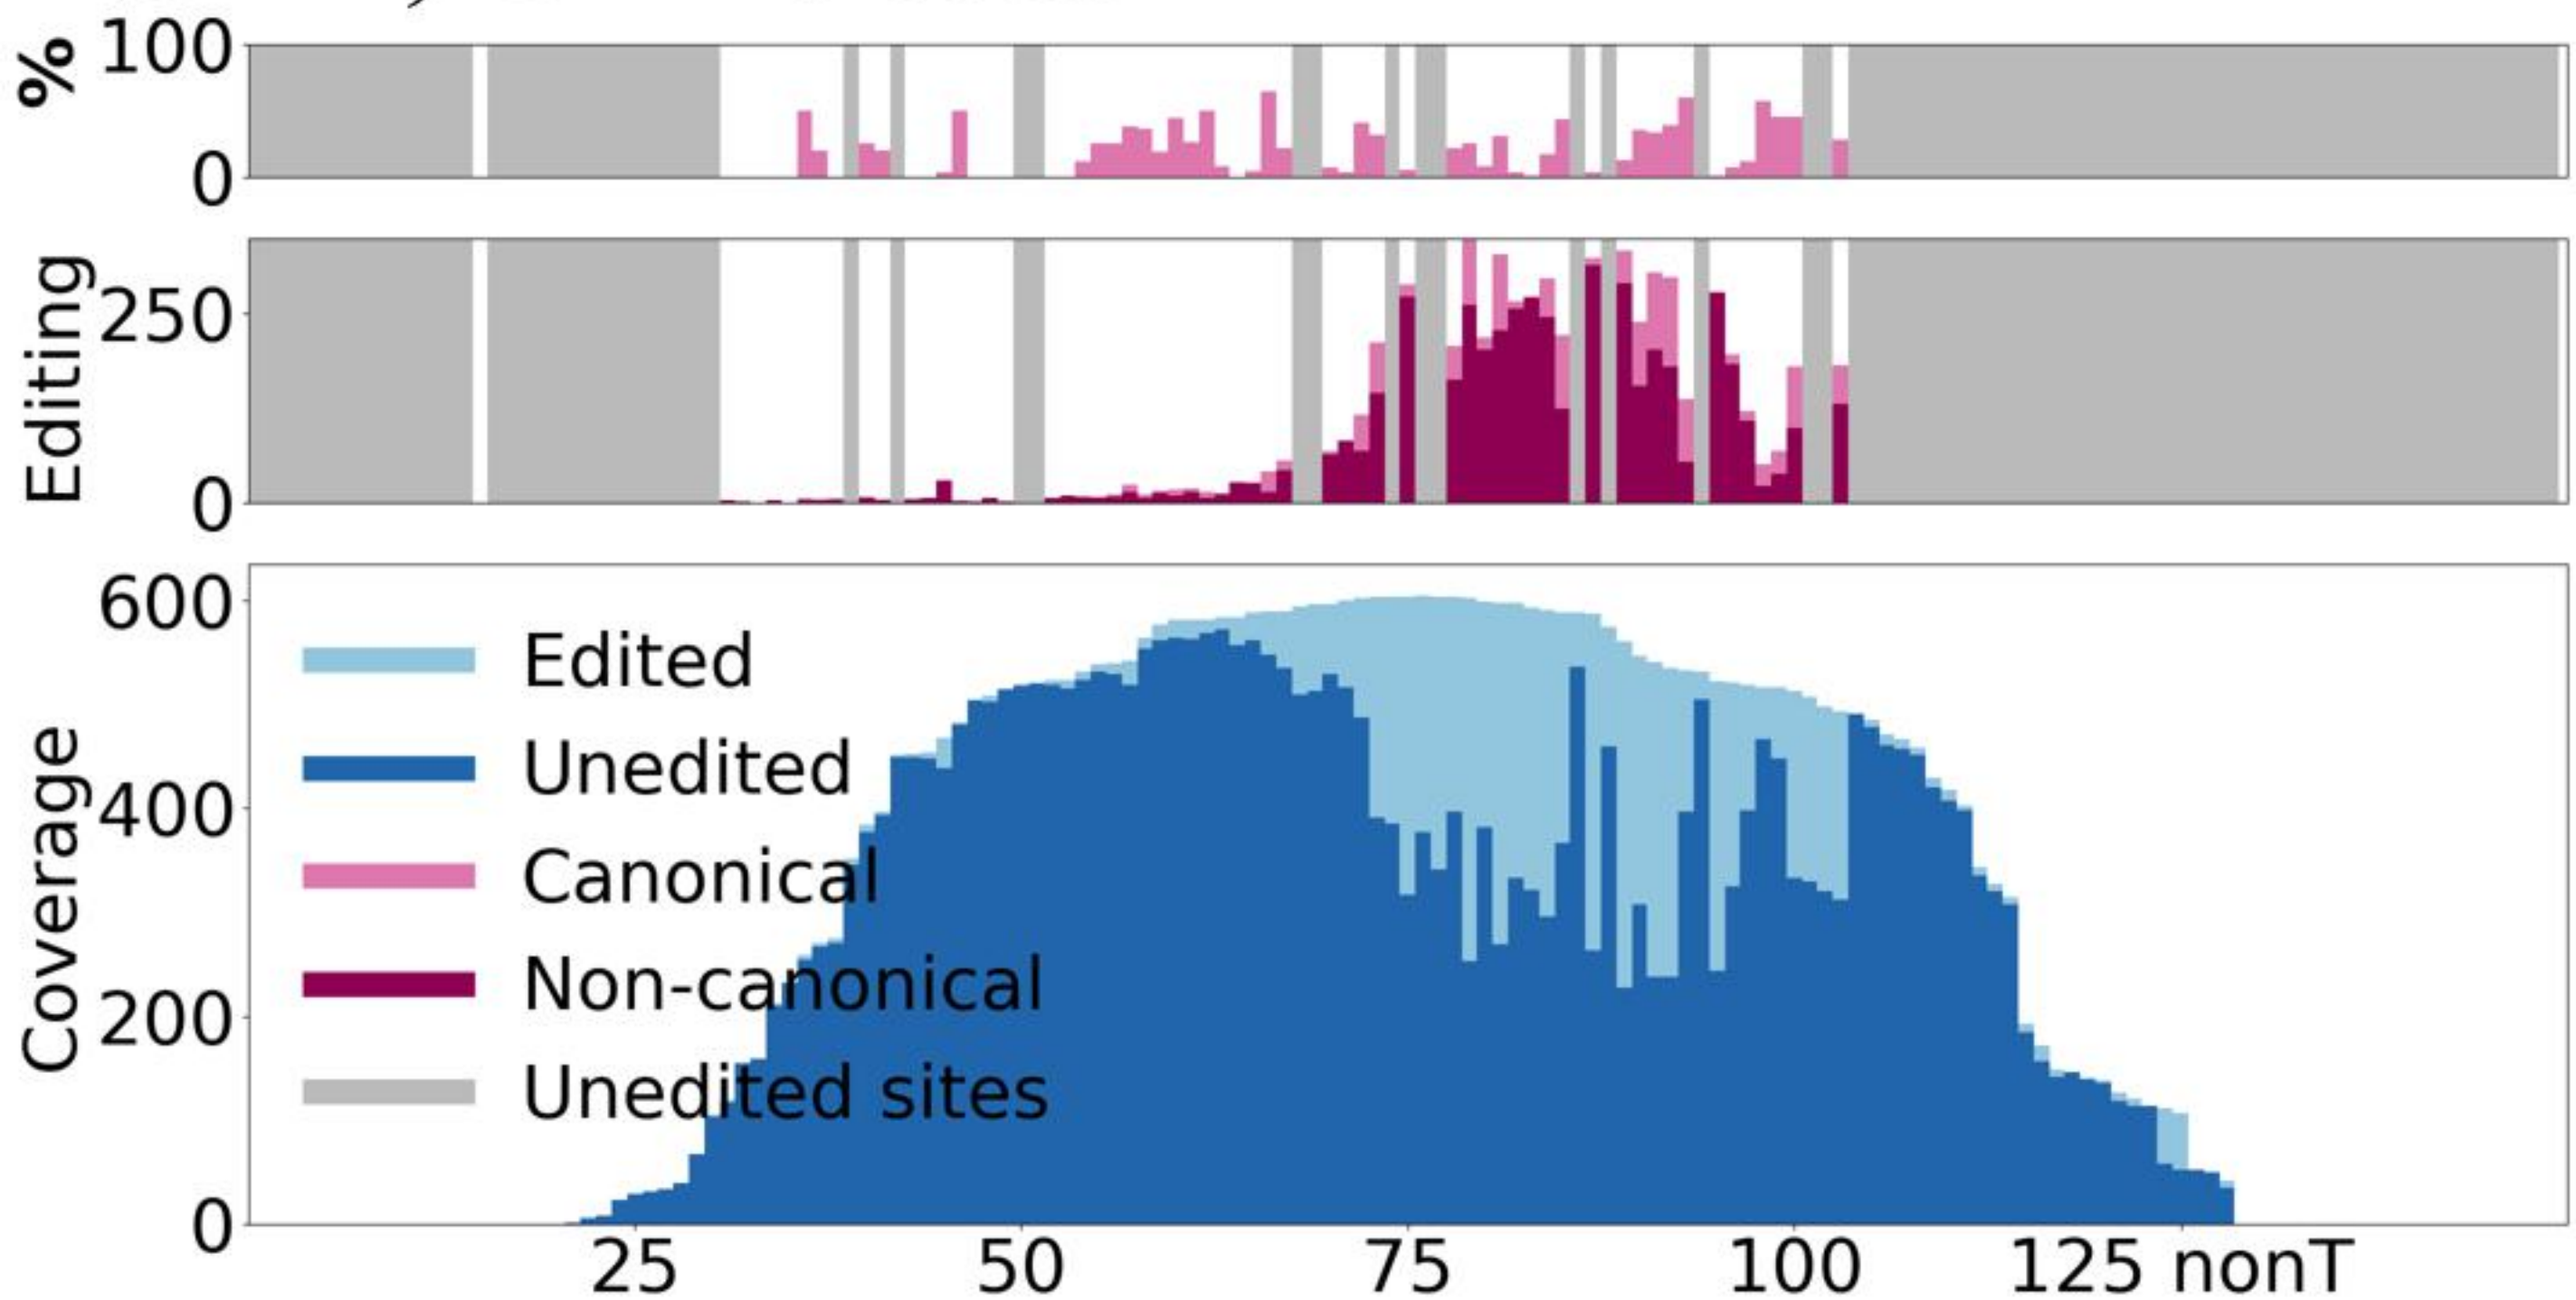

# SYL, CR4 : fed

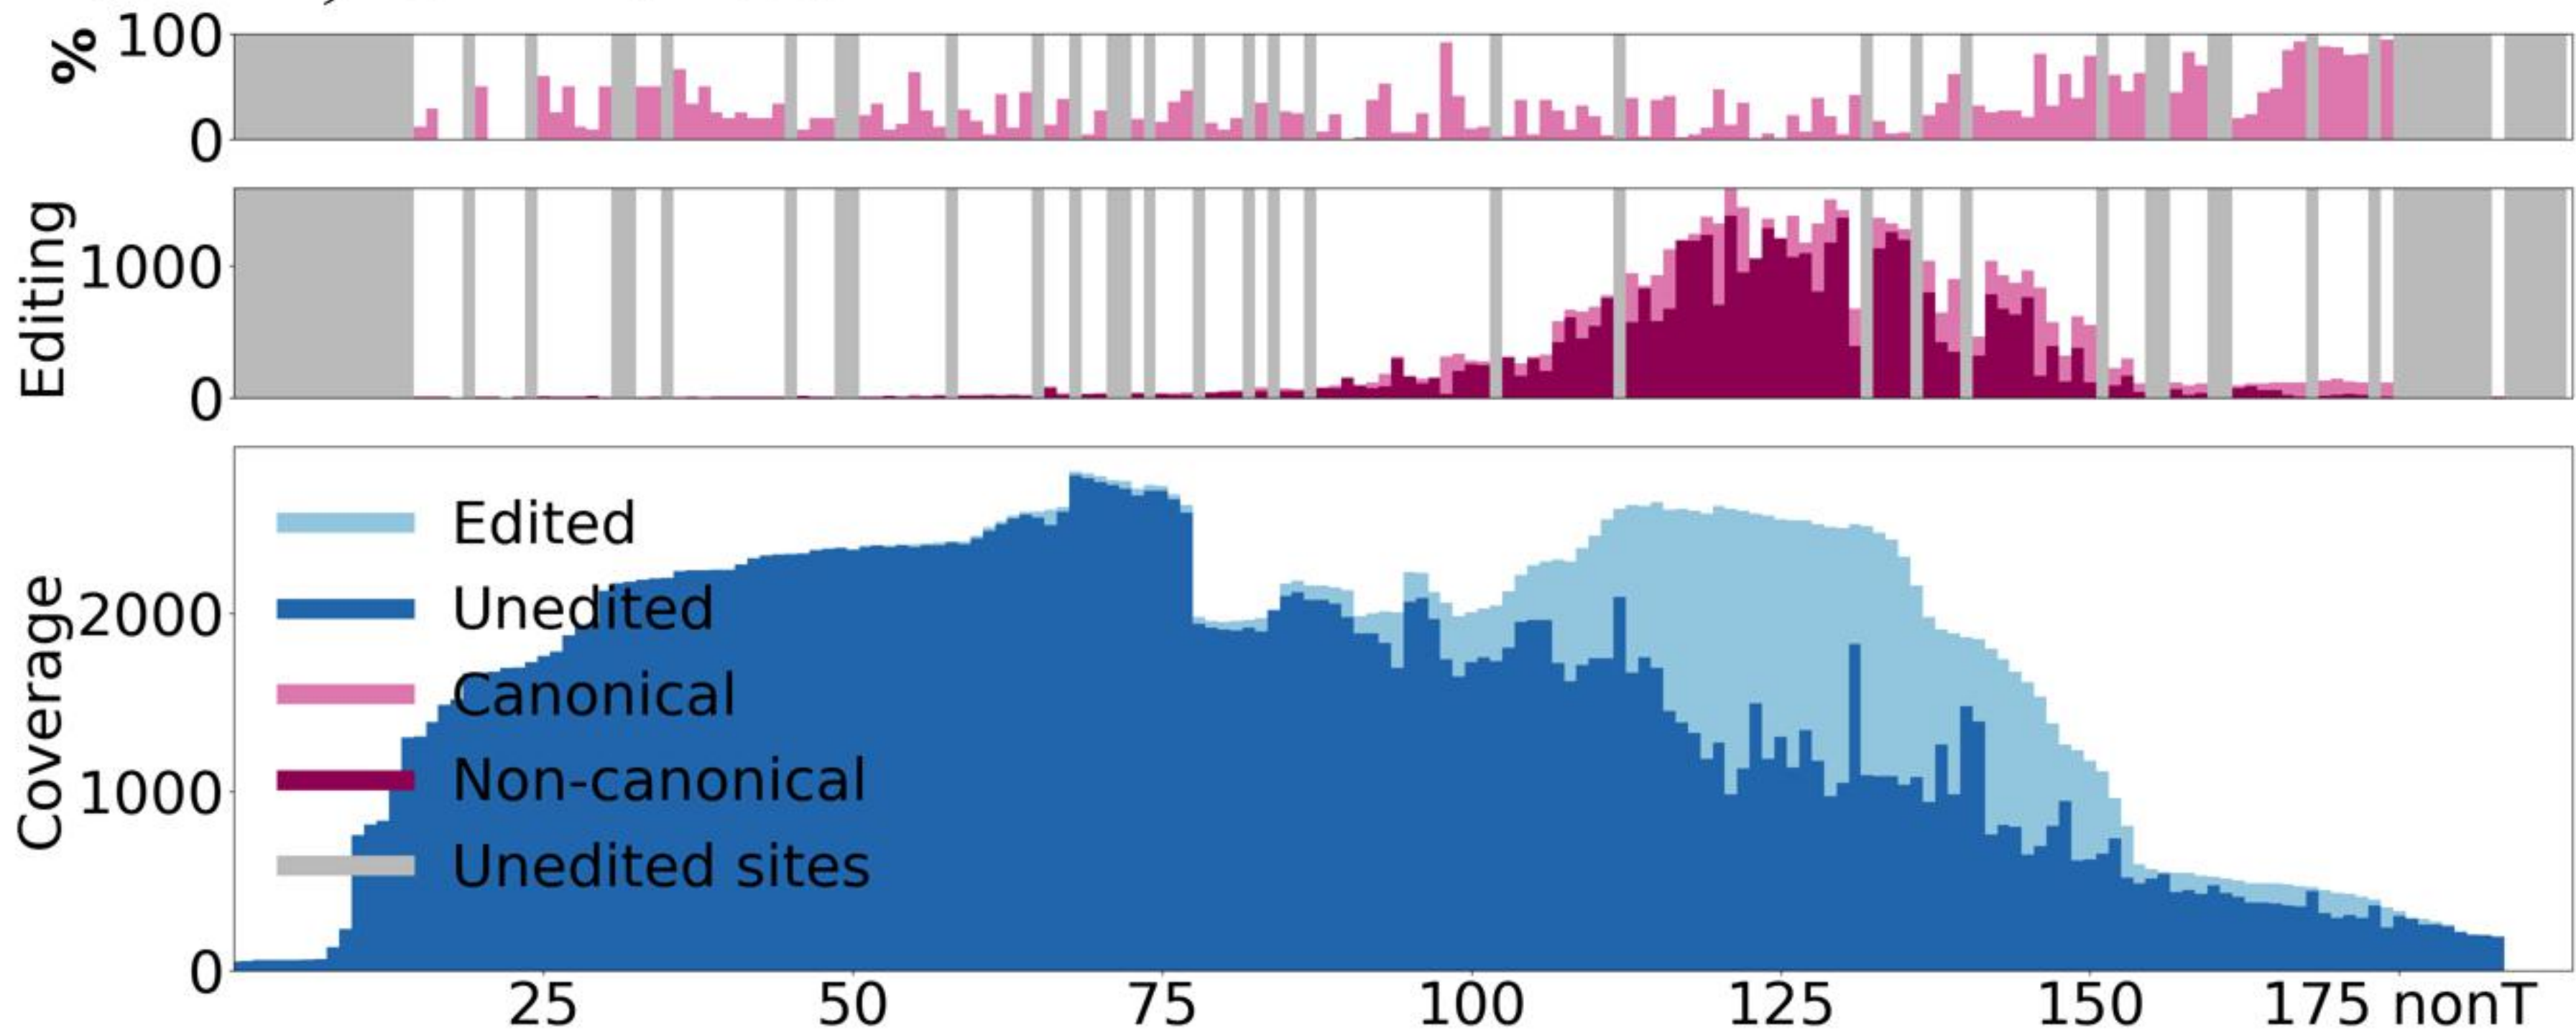

# SYL, CR4 : fed

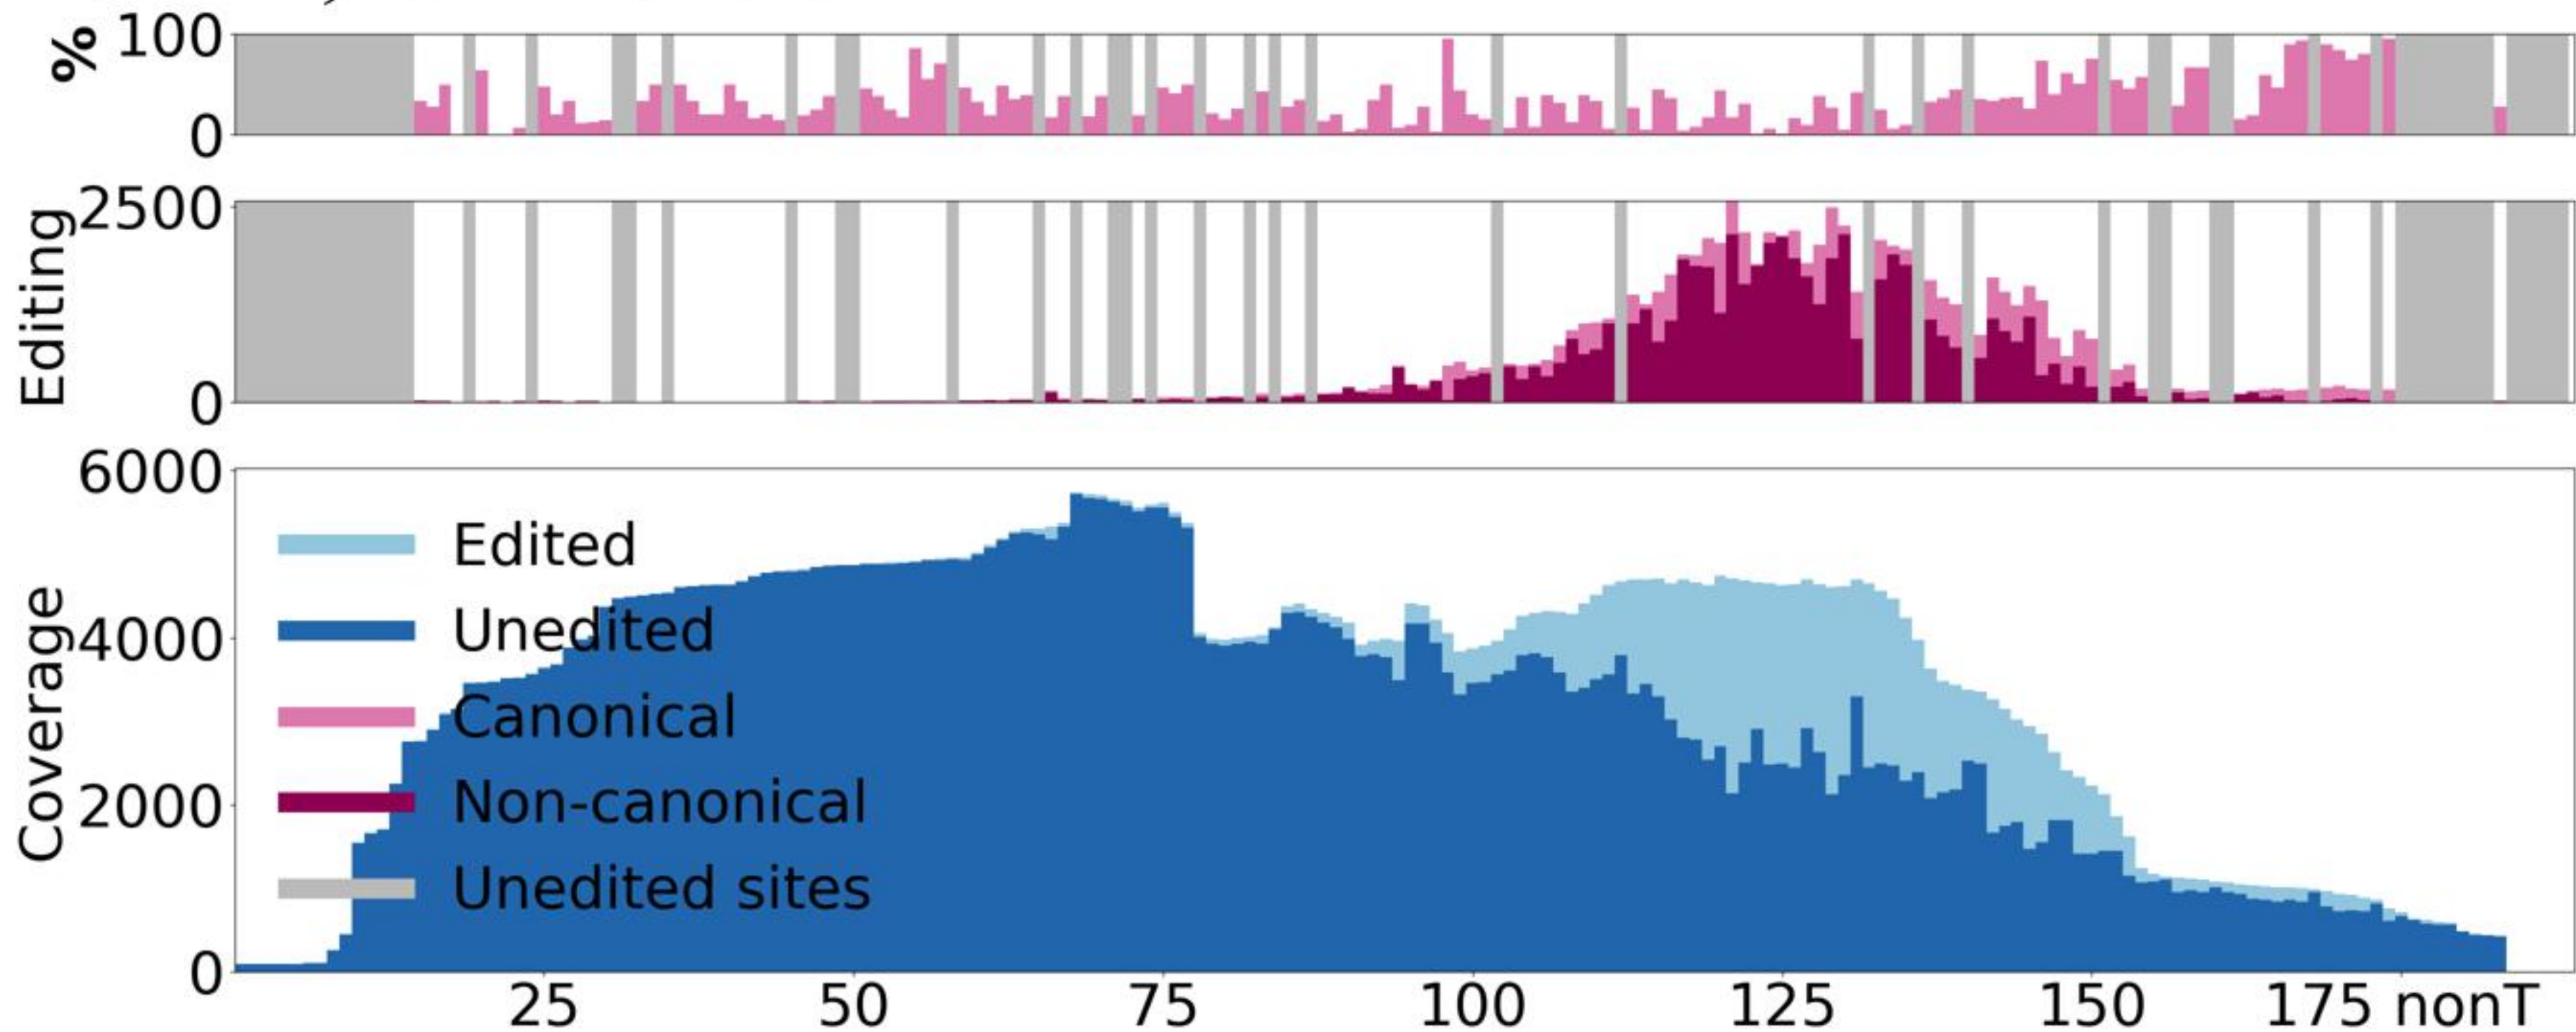

# SYL, CR4 : abrupt

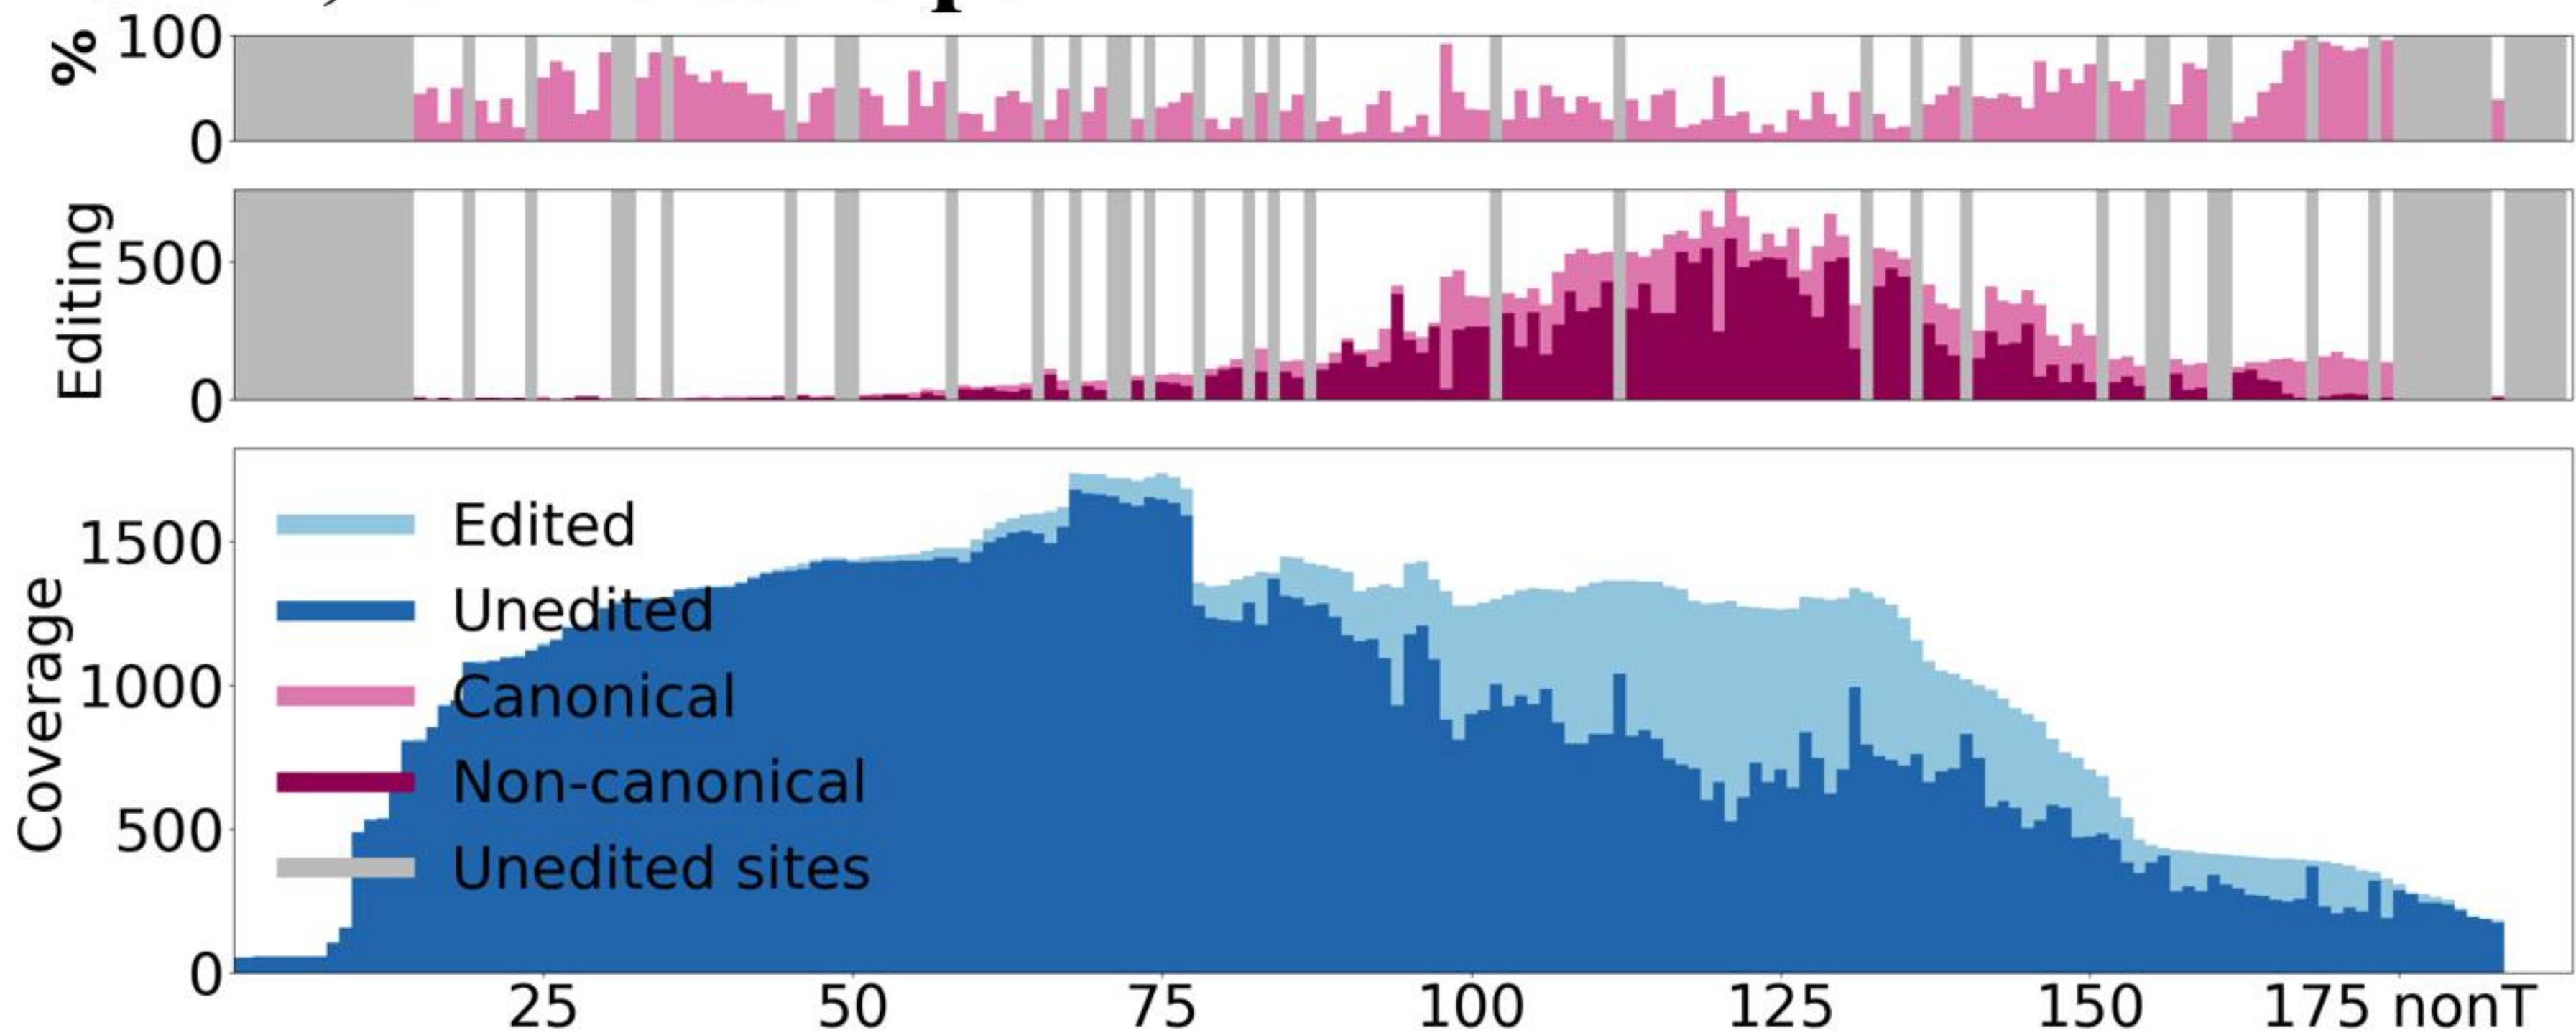

# SYL, CR4 : abrupt

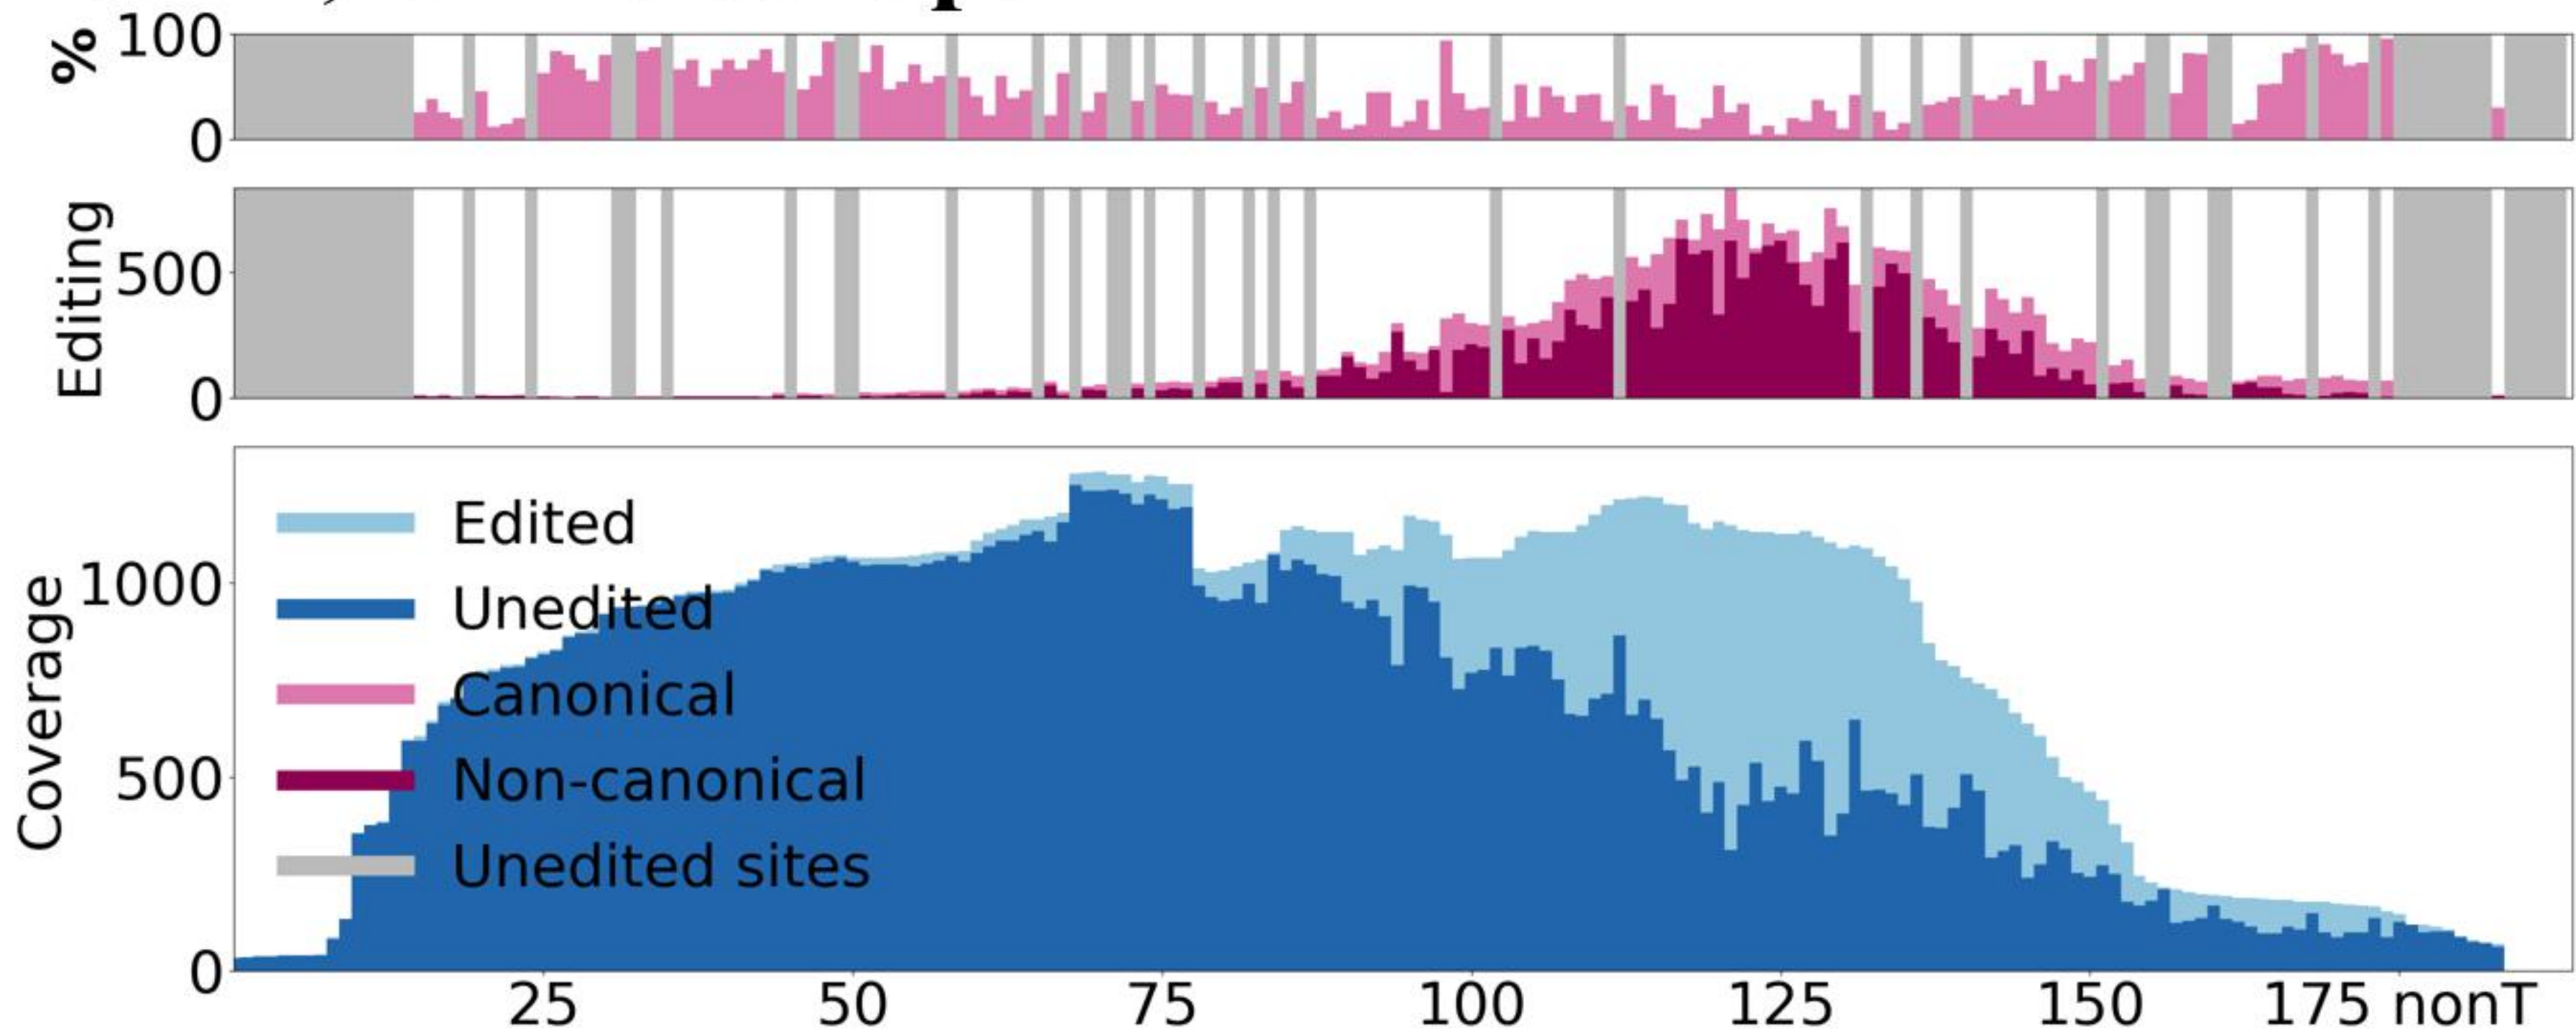

# SYL, CR4 : slow

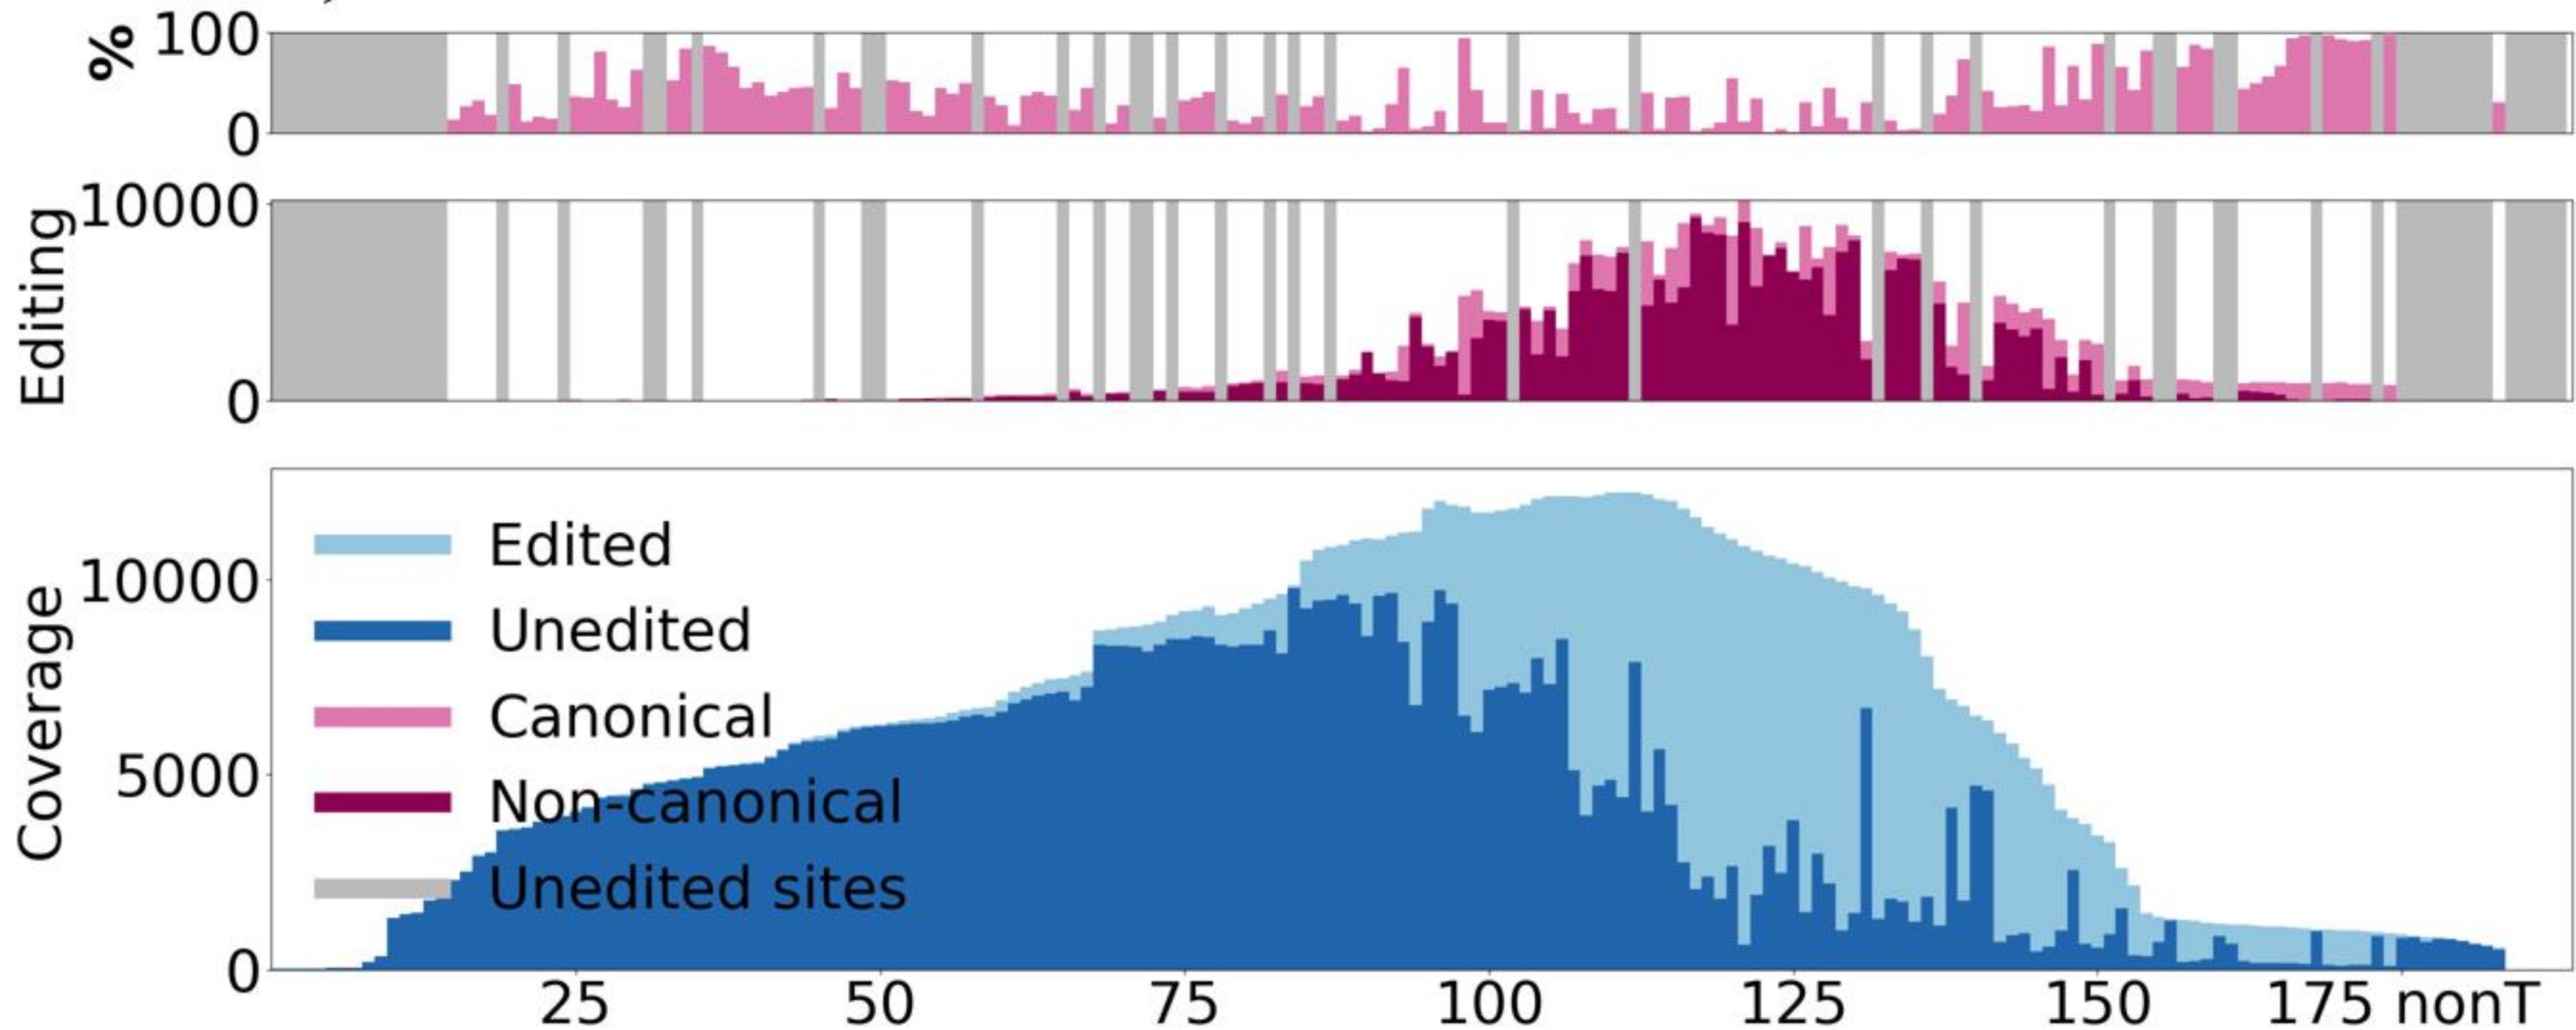

# SYL, CR4 : slow

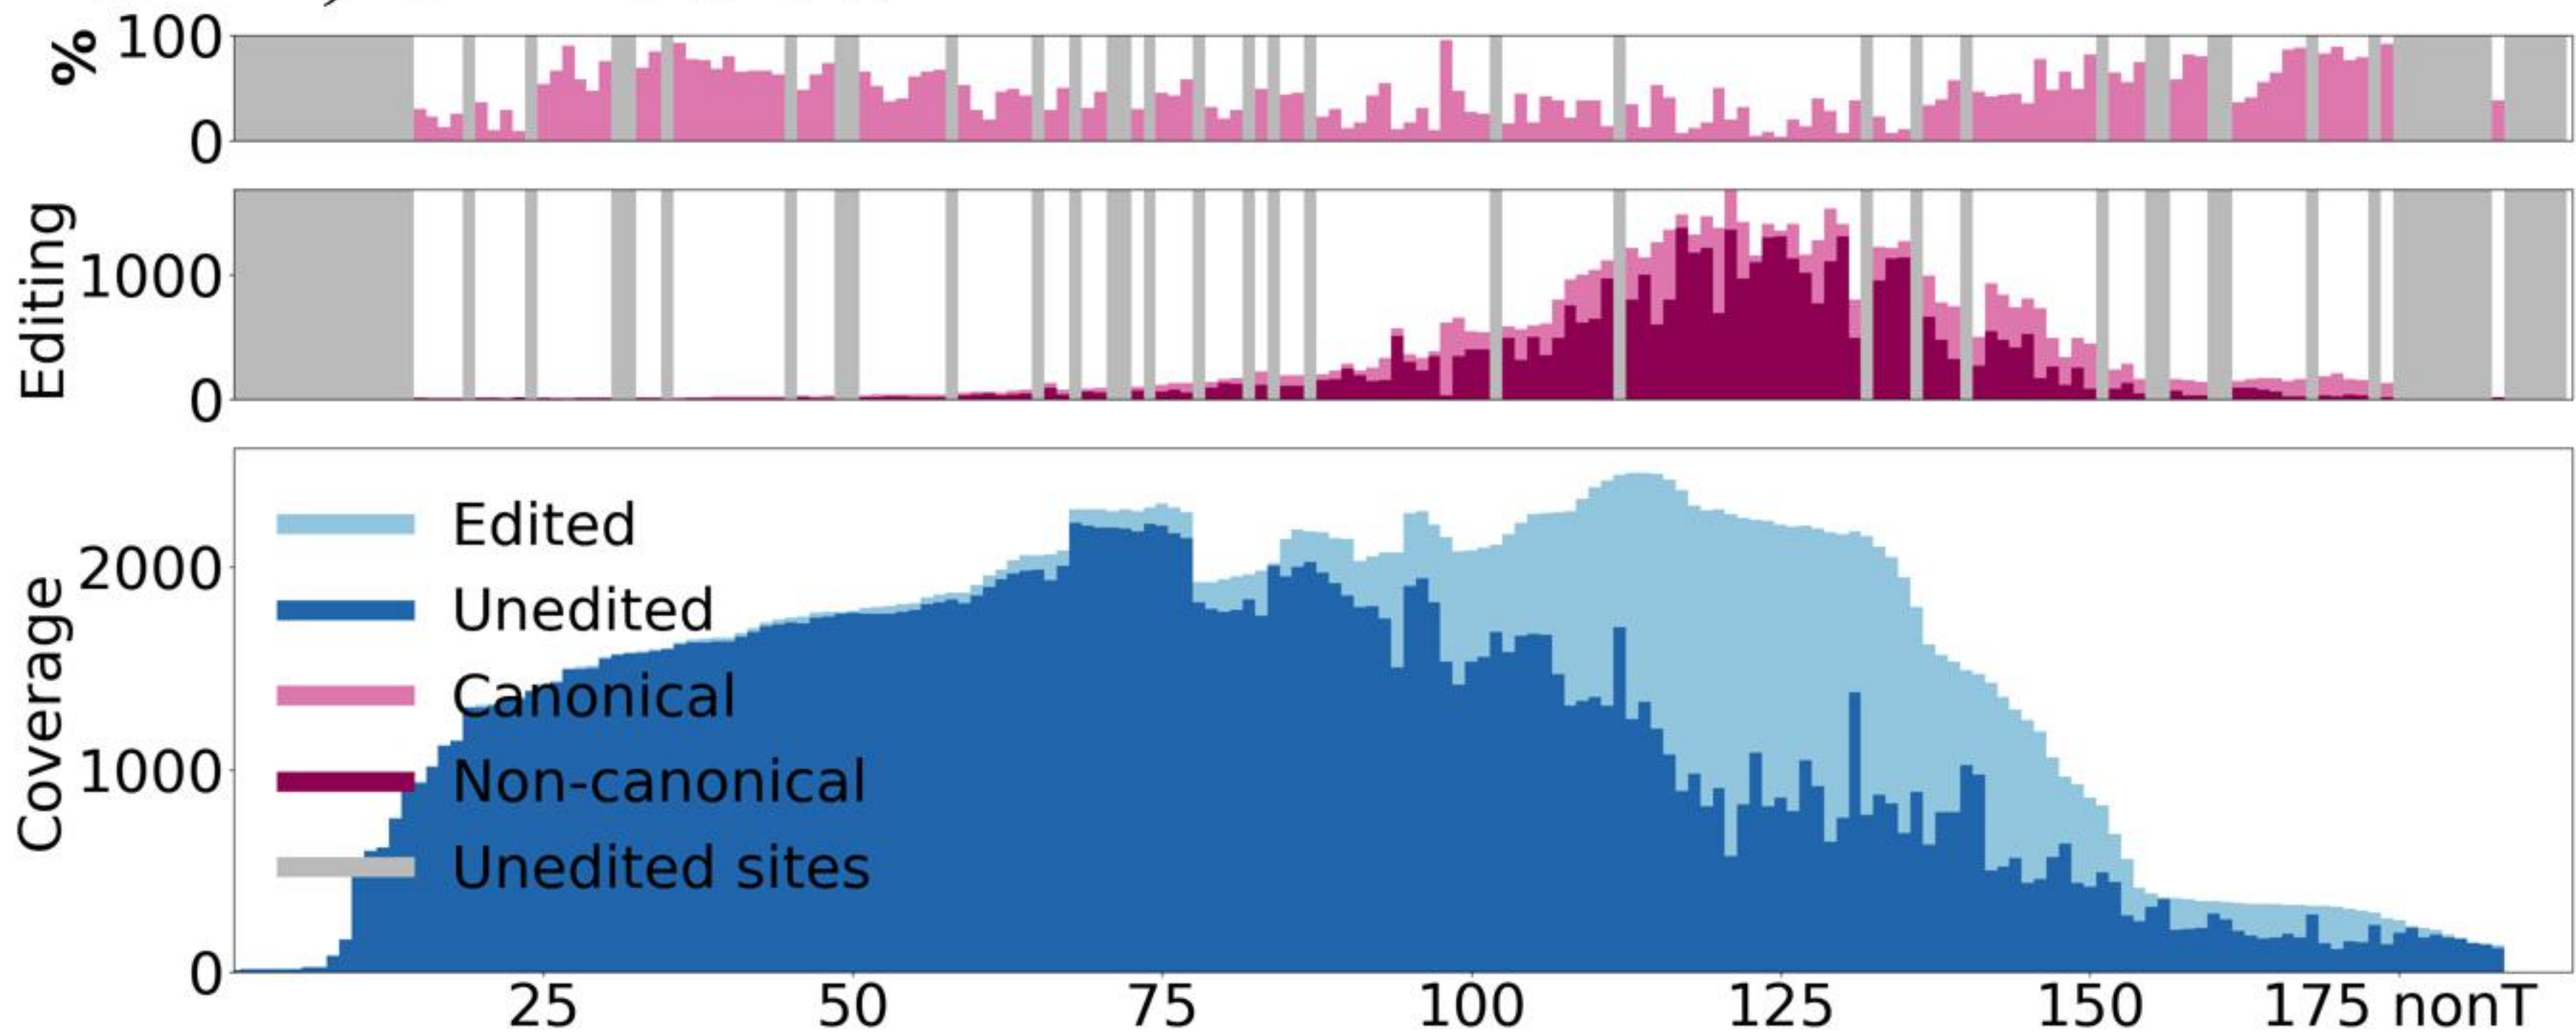

# SYL, CR4 : mito

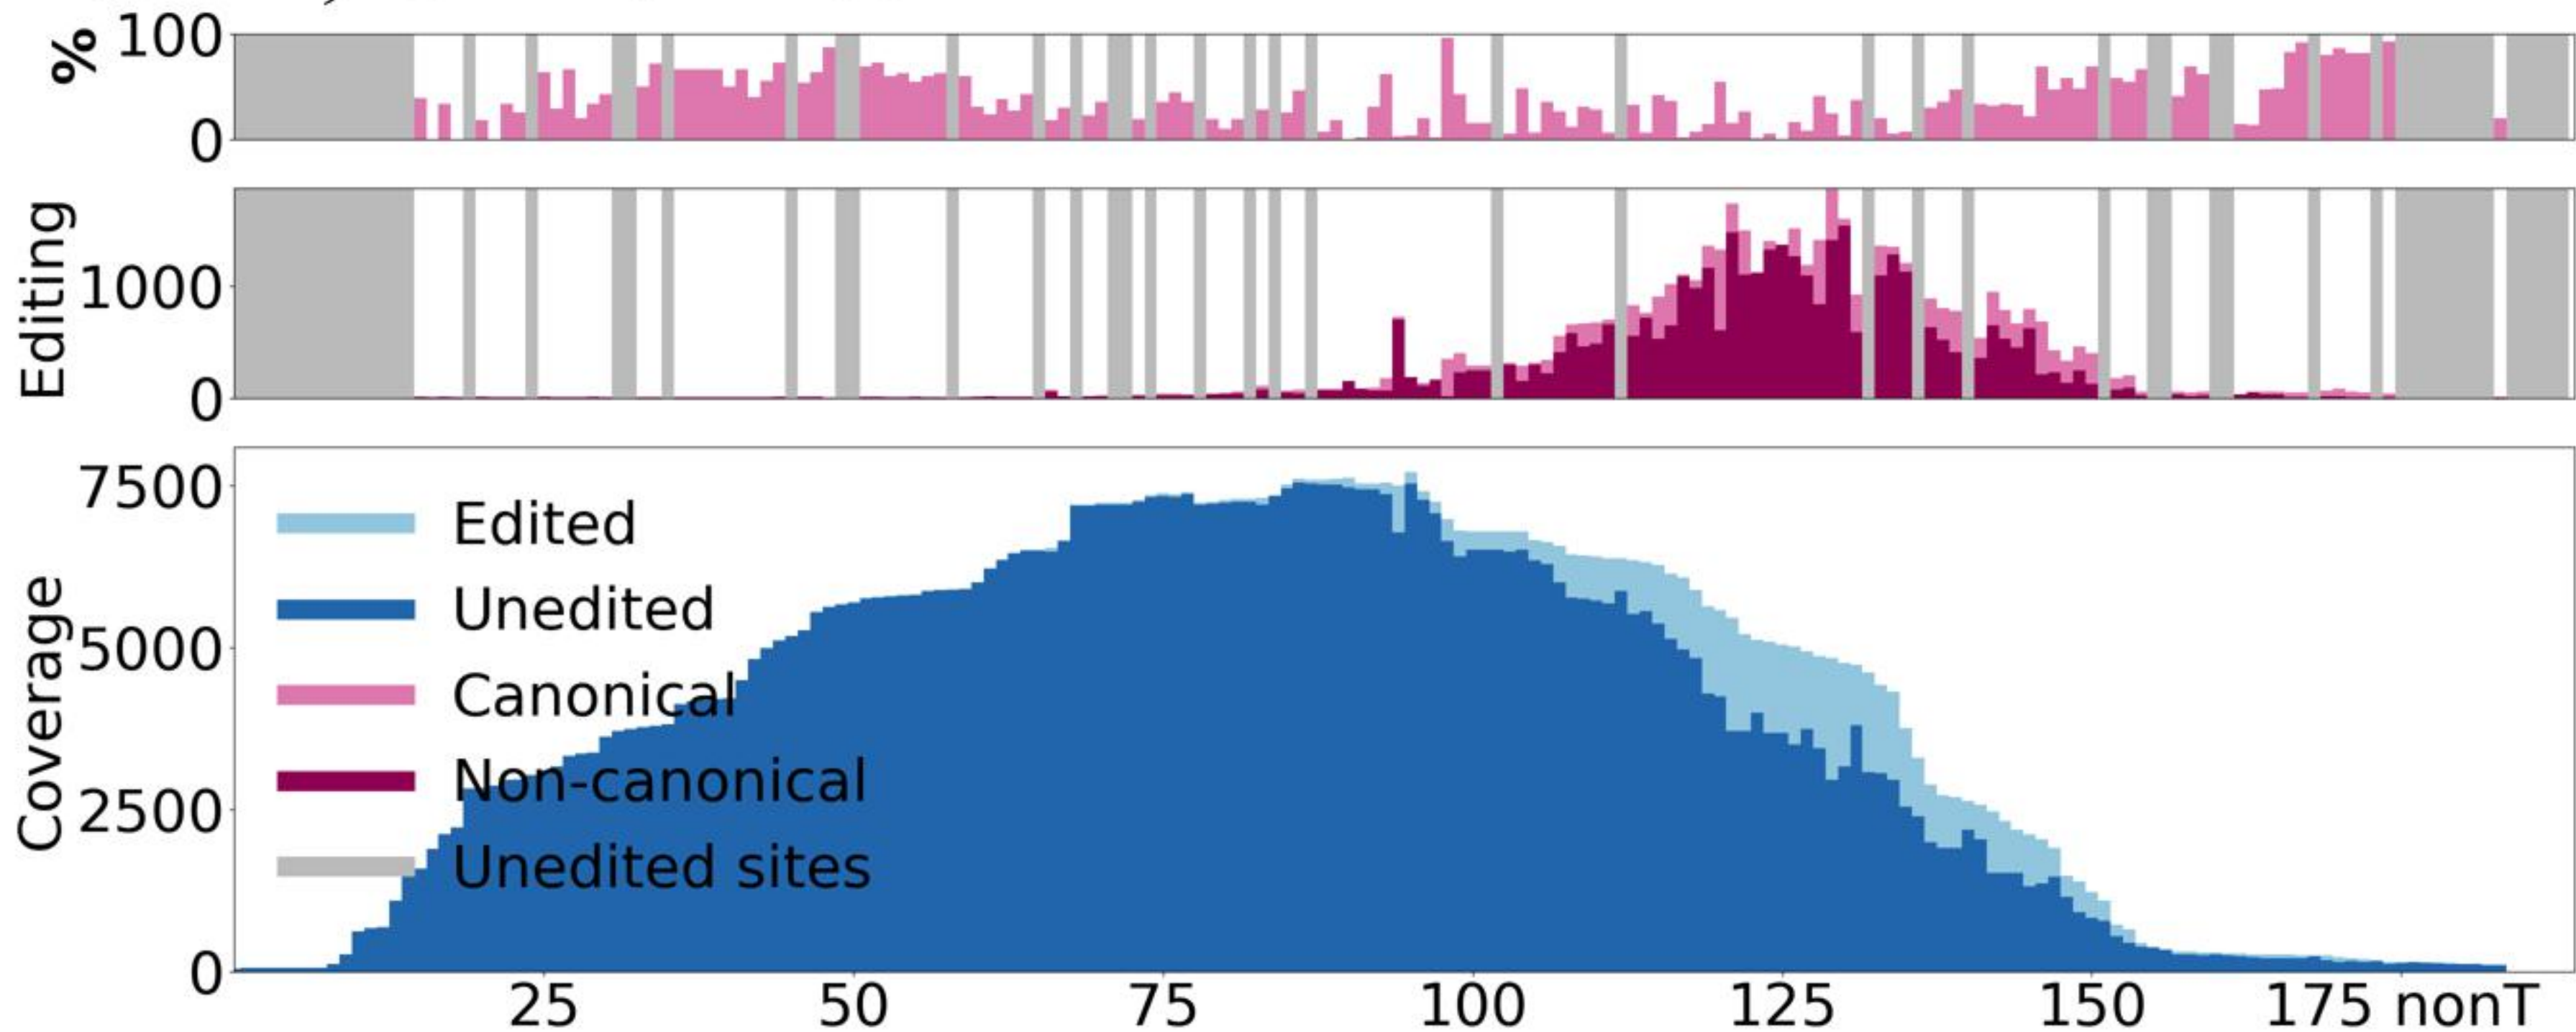

# SYL, CR4 : mito

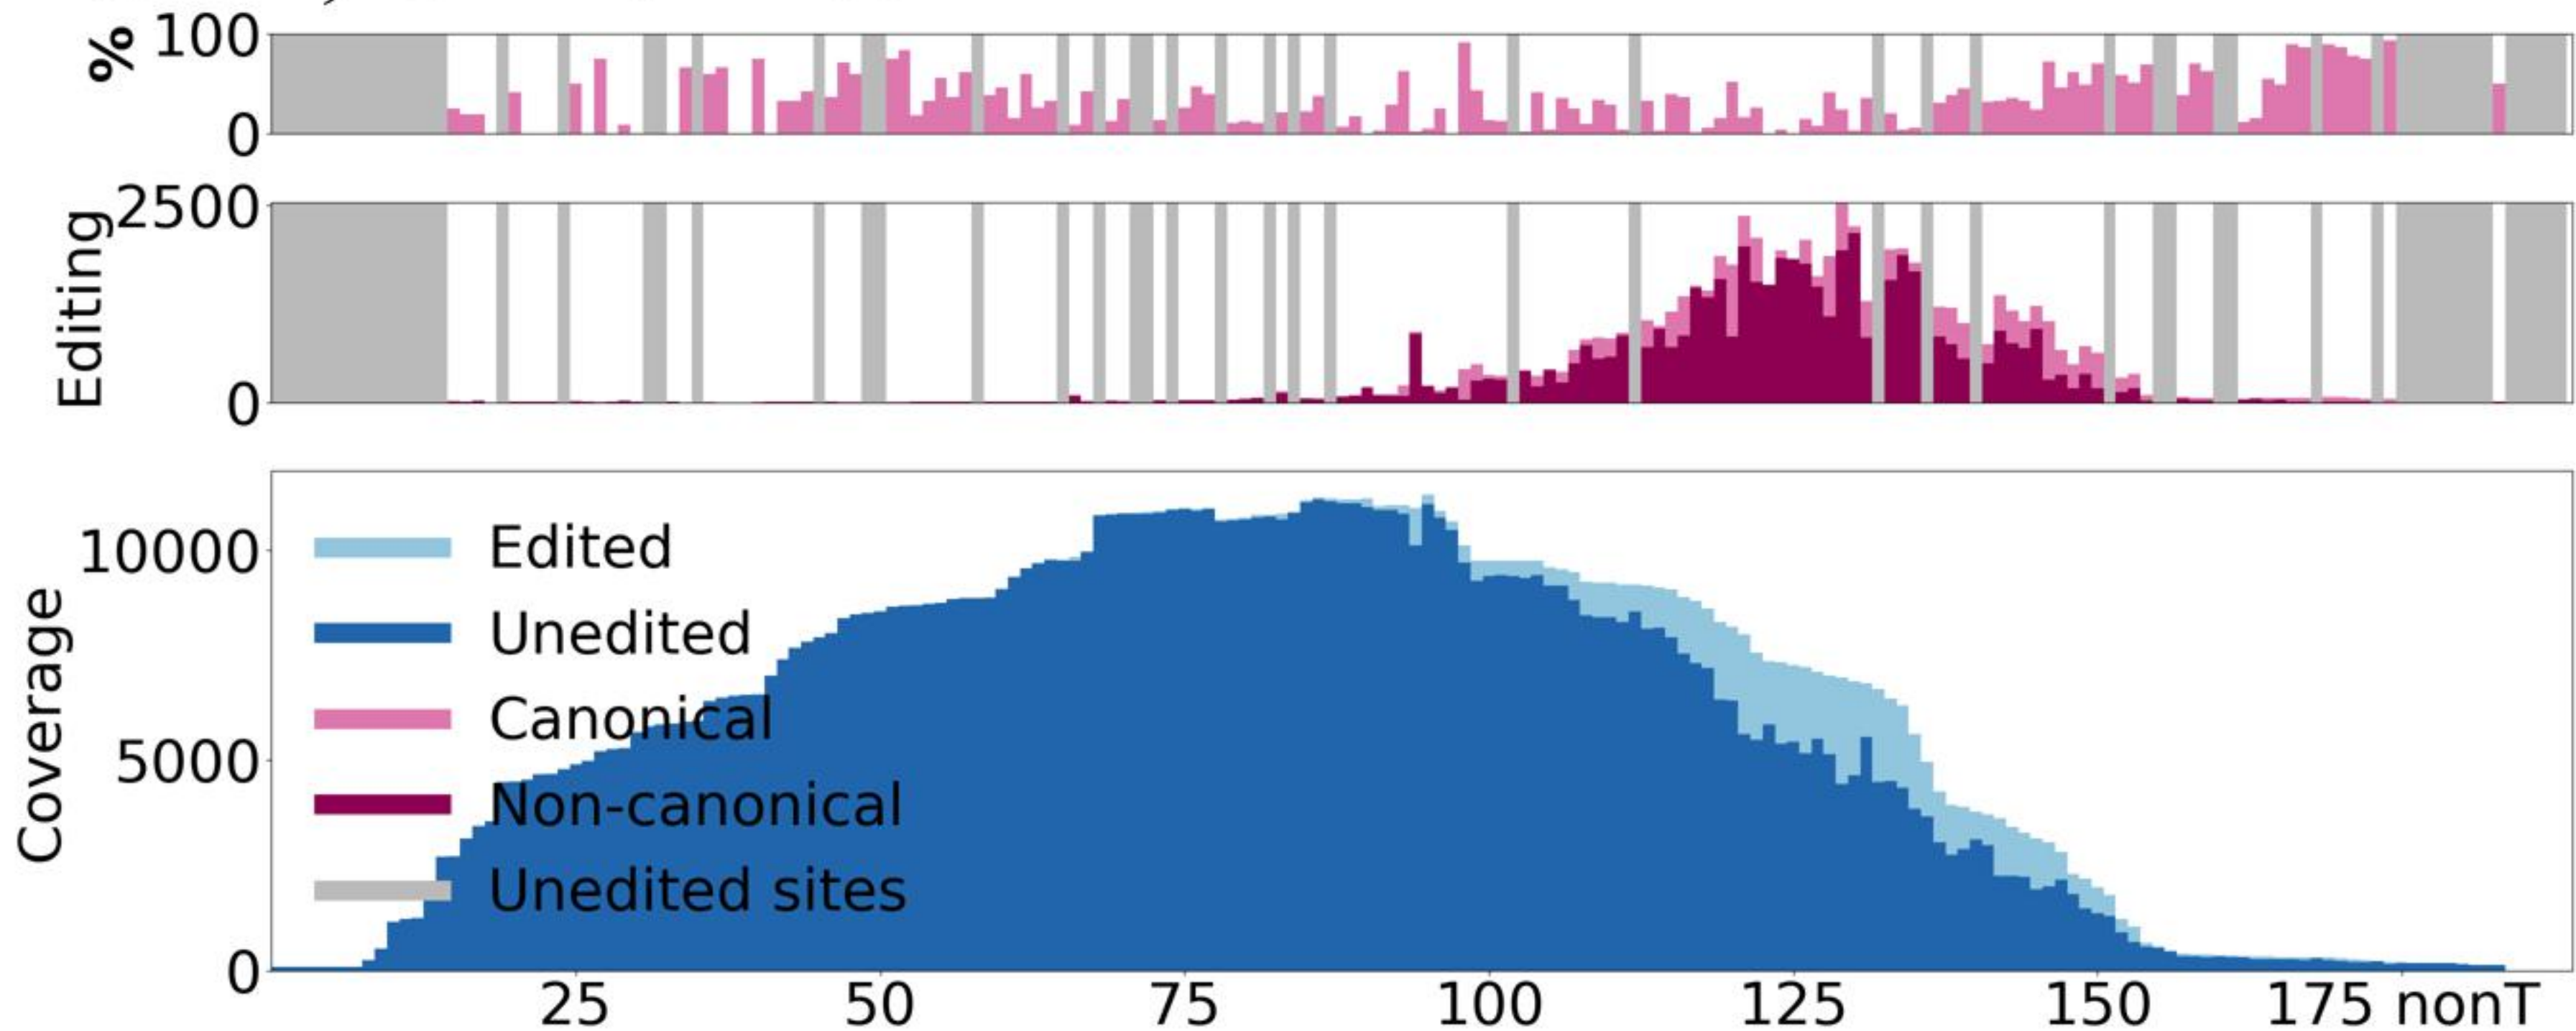

# SYL, CR4 : total

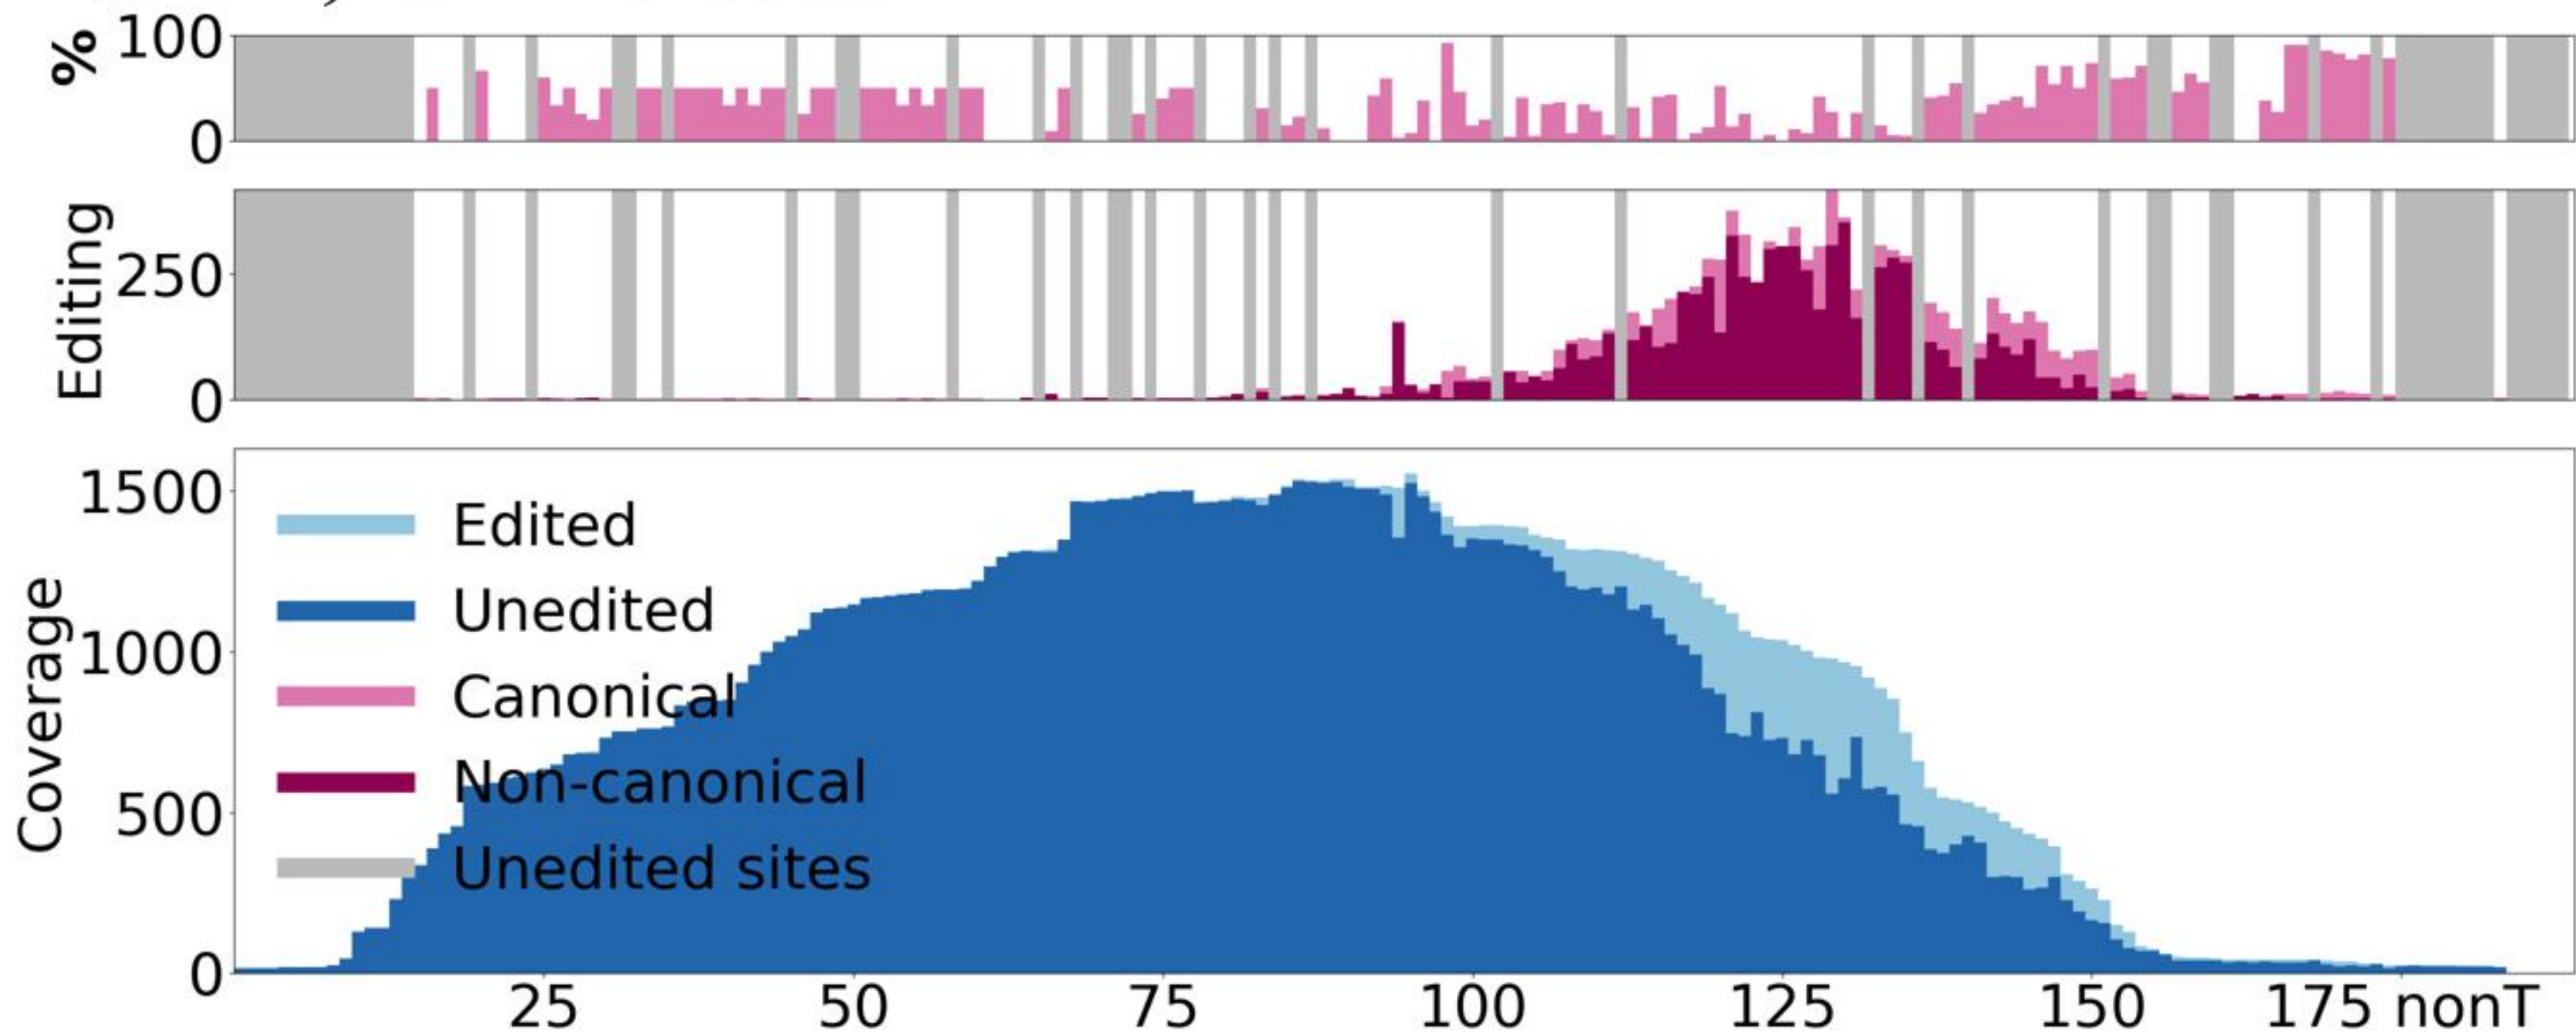

# SYL, CR4 : total

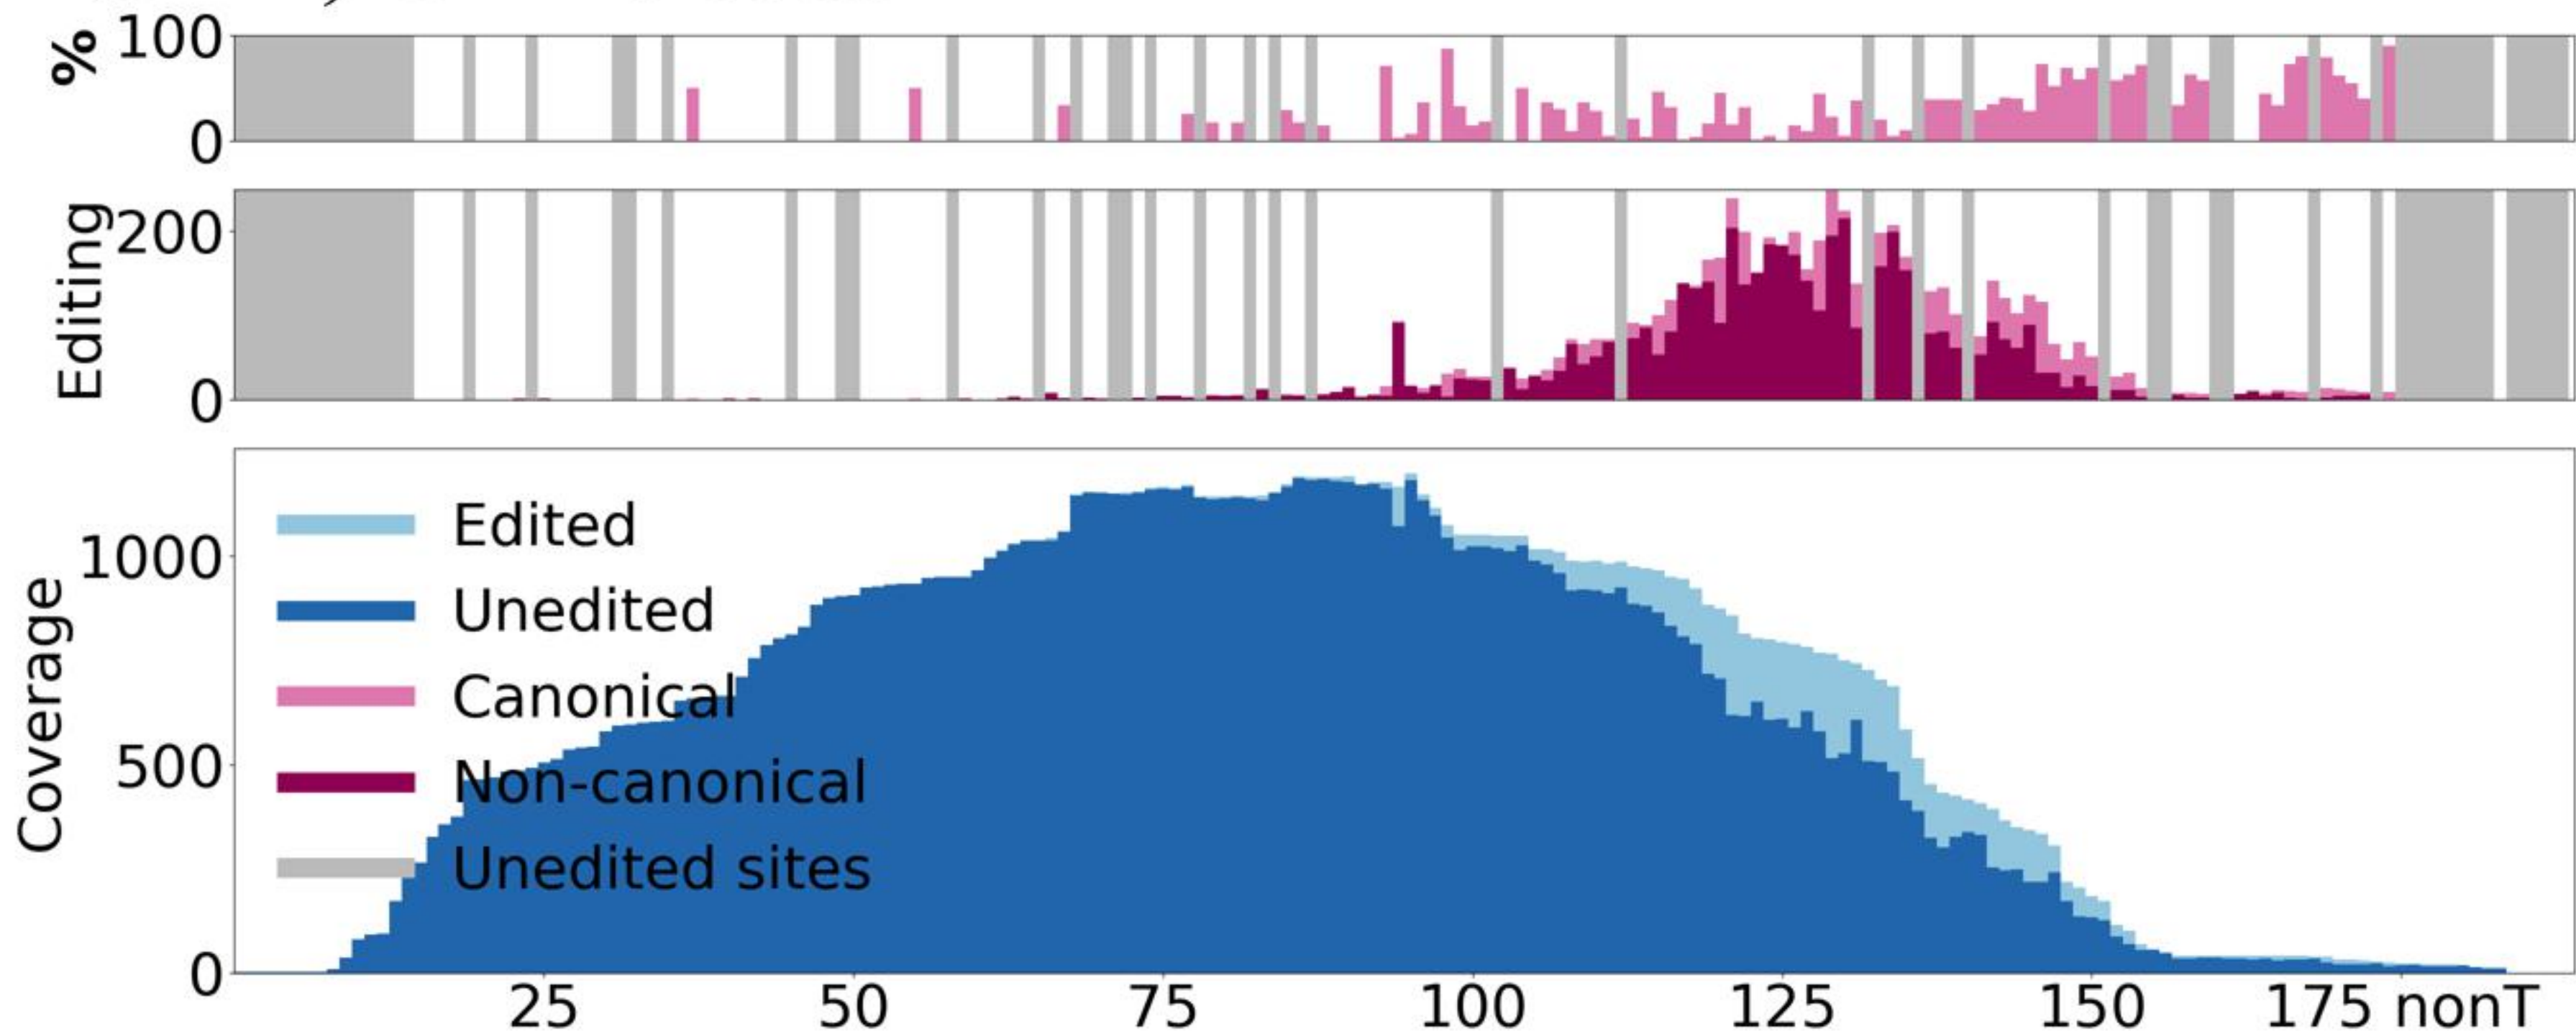

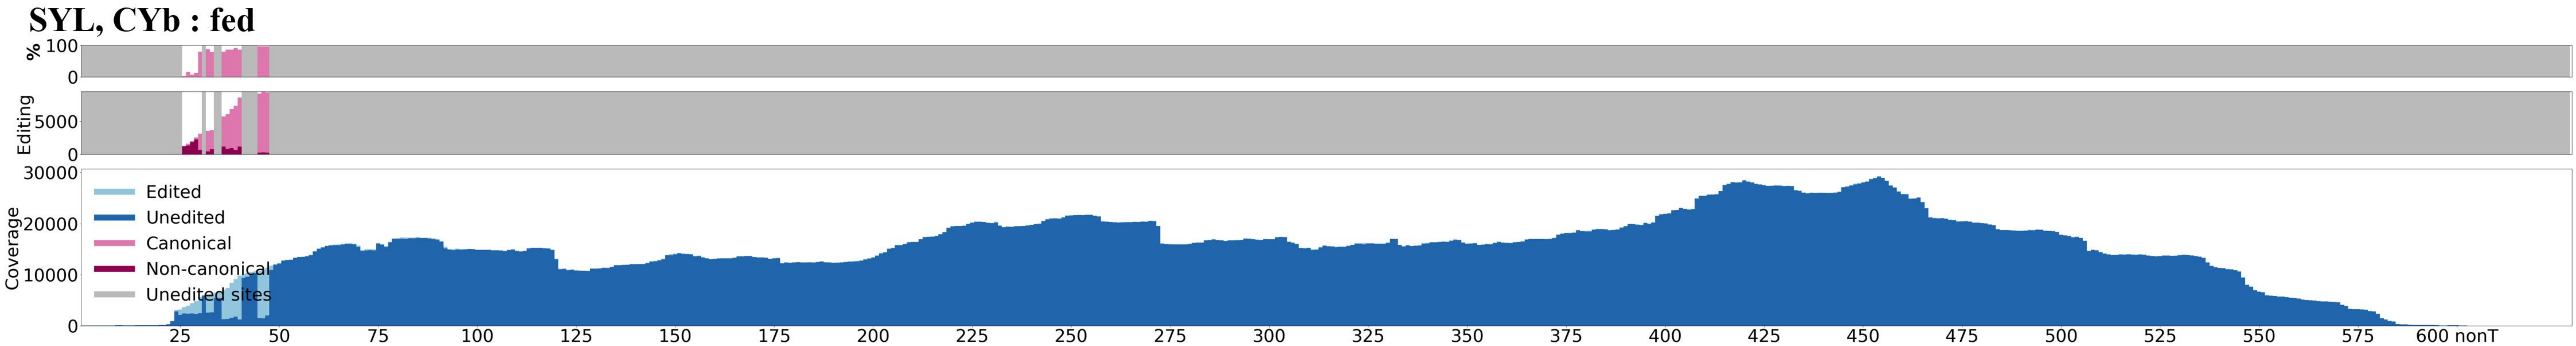

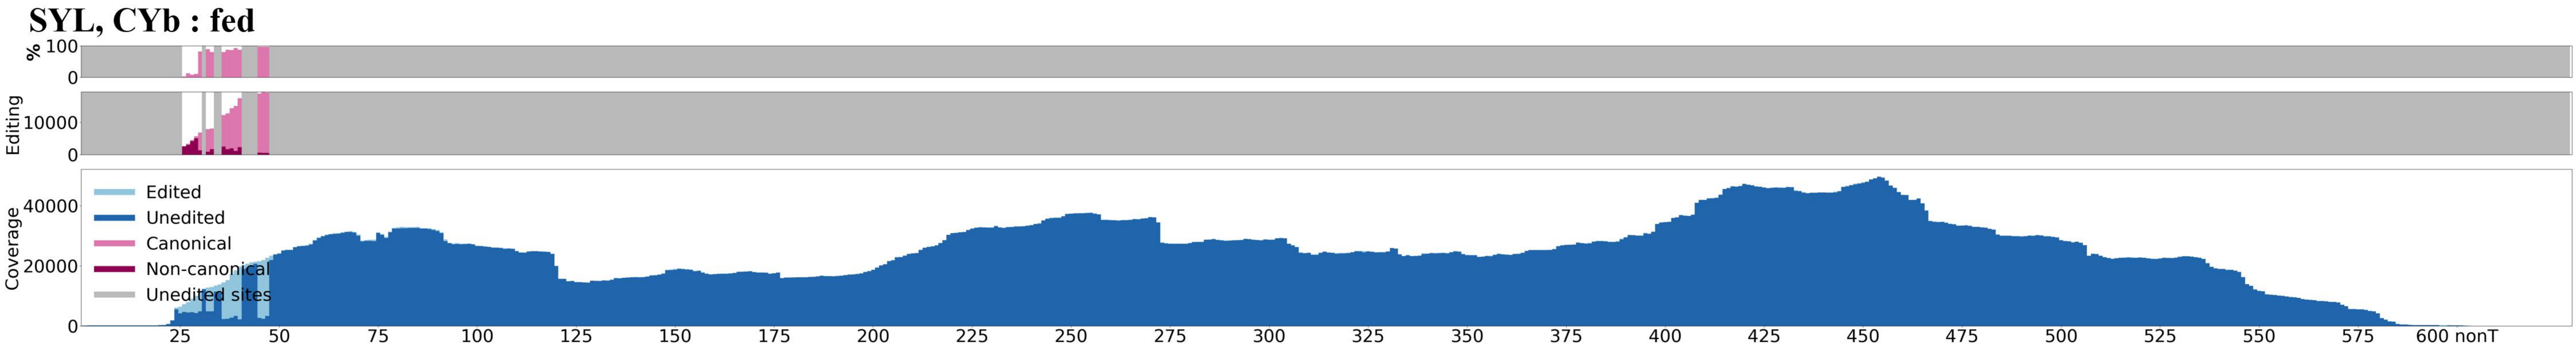

# SYL, CYb : abrupt

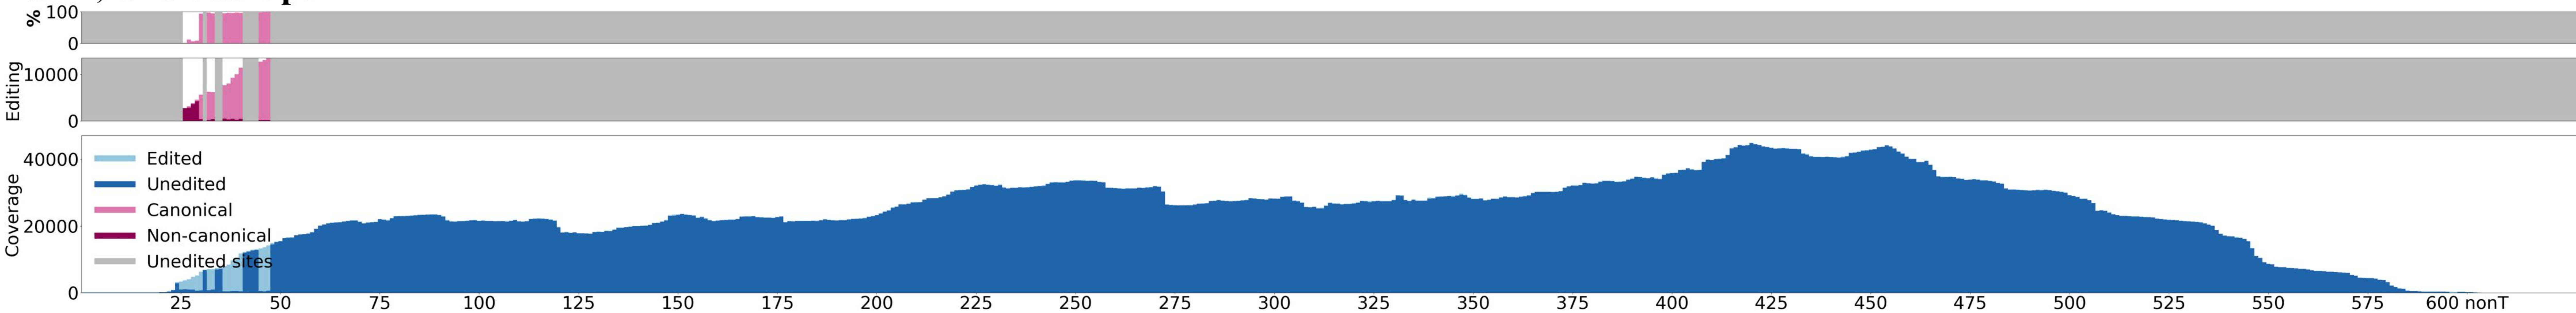

# SYL, CYb : abrupt

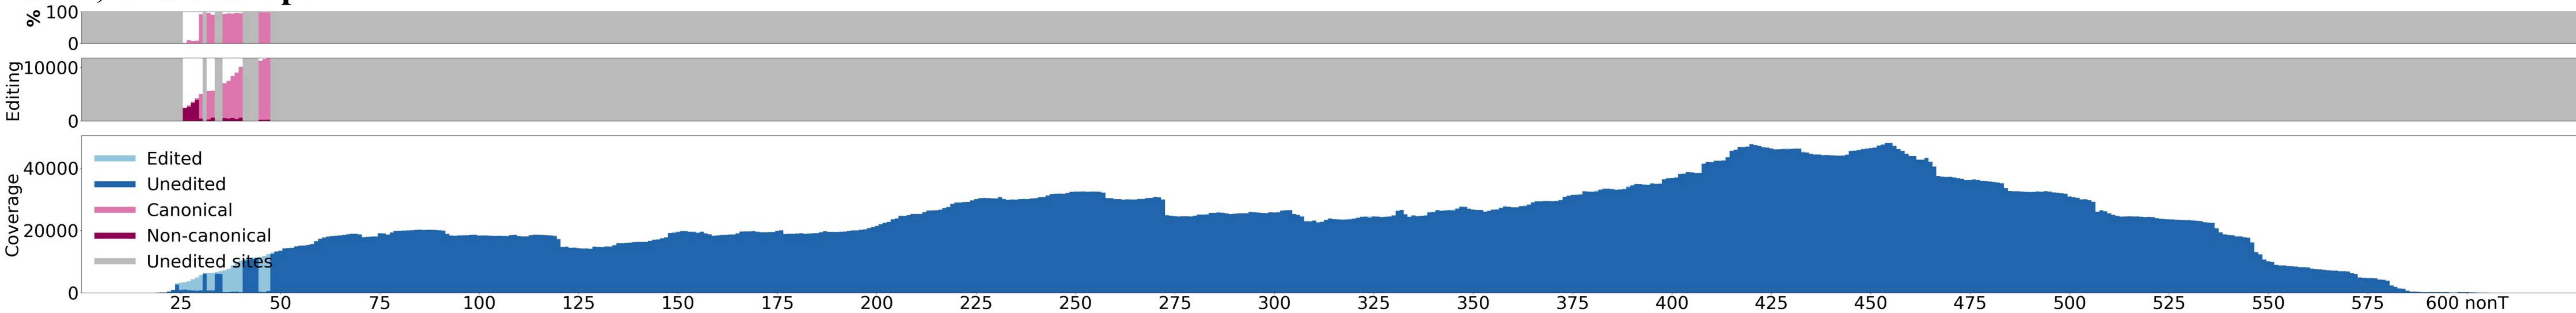

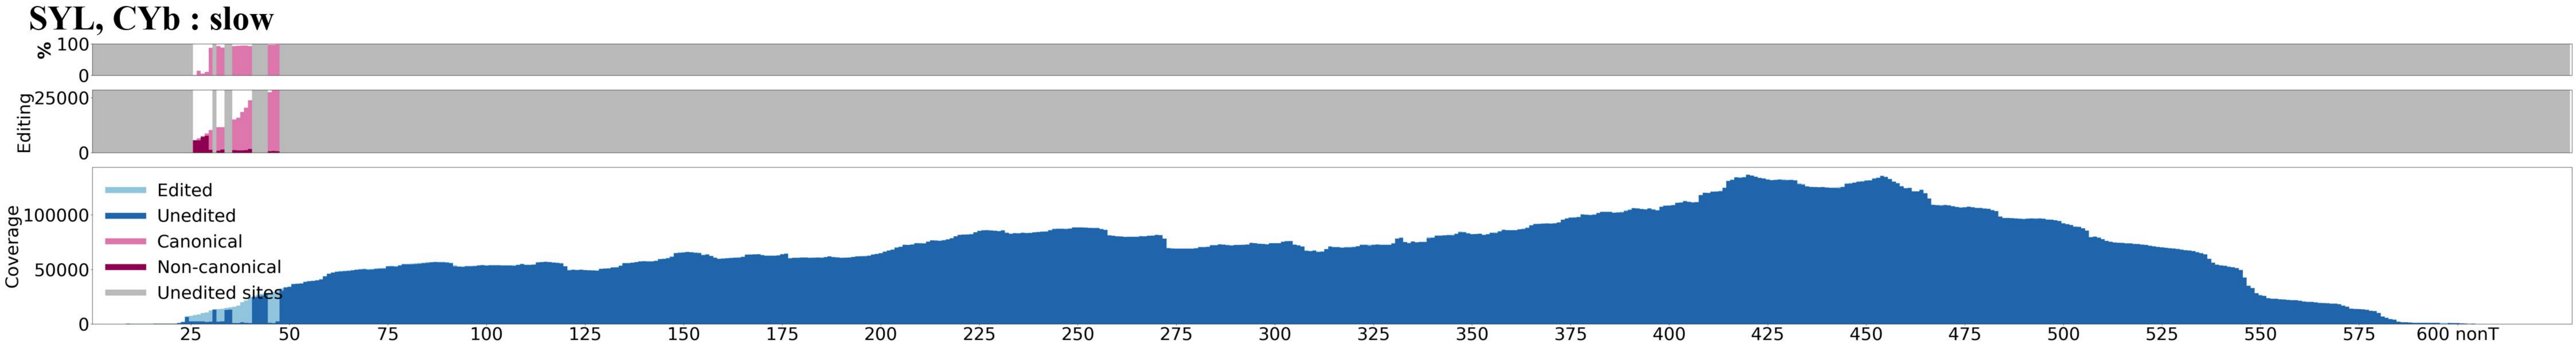

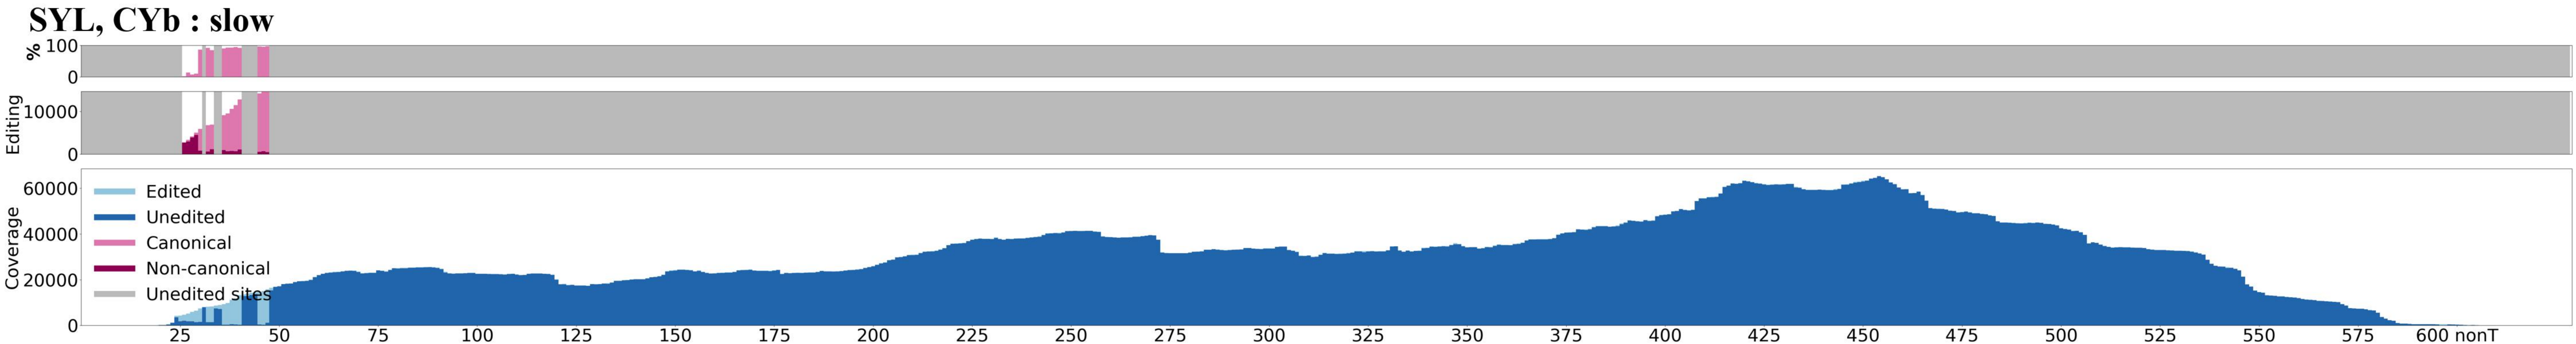

# SYL, CYb : mito

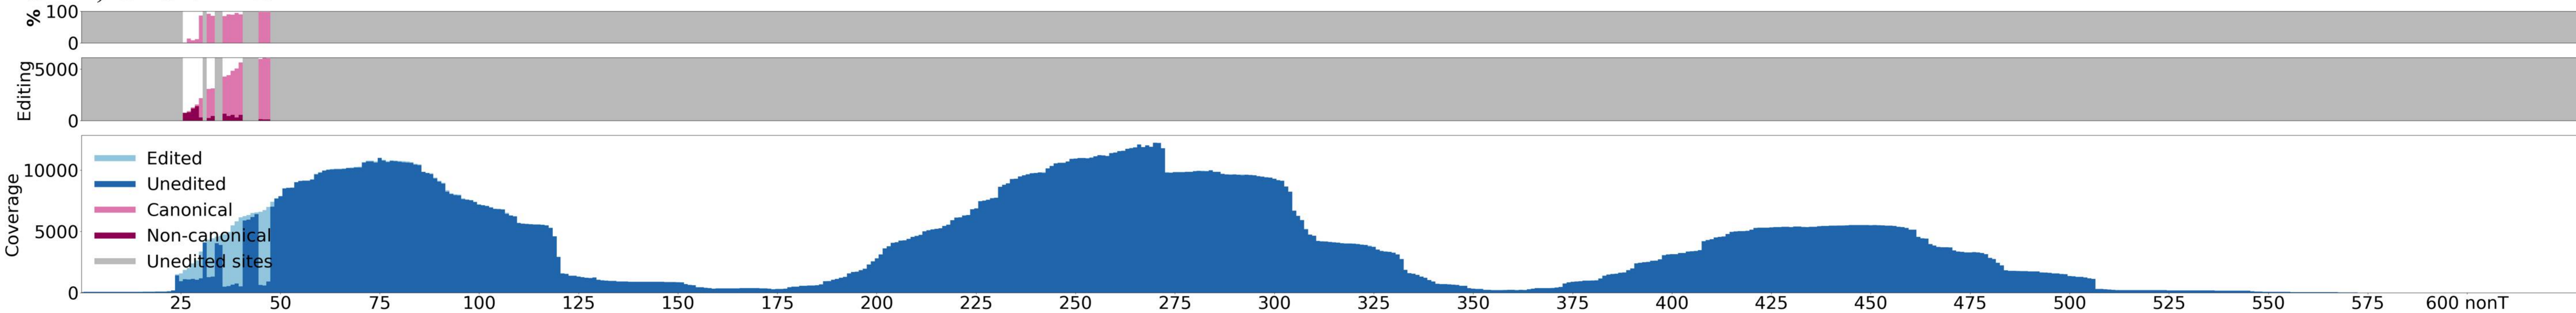

# SYL, CYb : mito

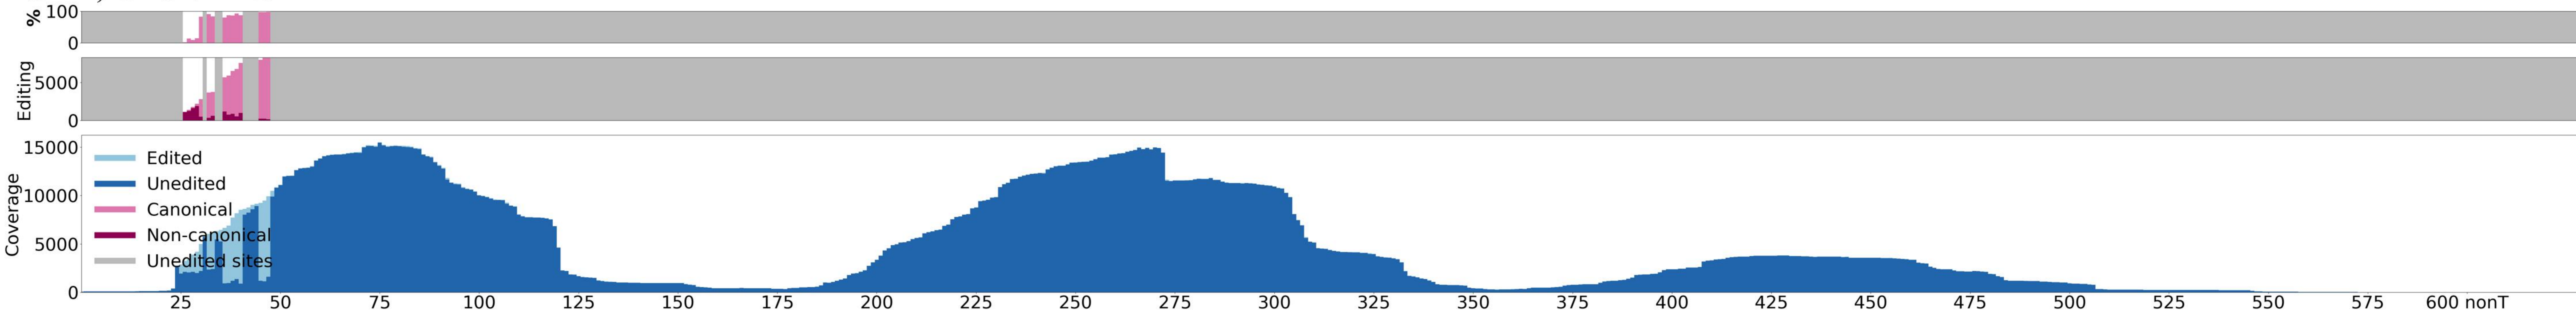

# SYL, CYb : total

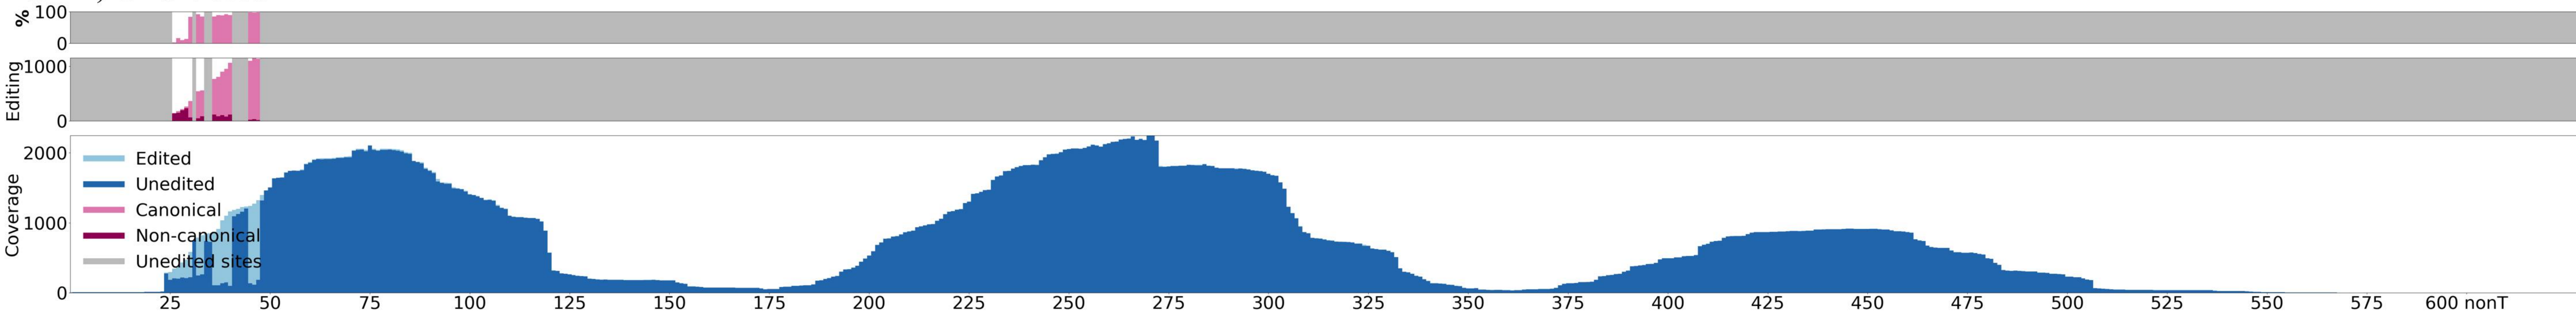

# SYL, CYb : total

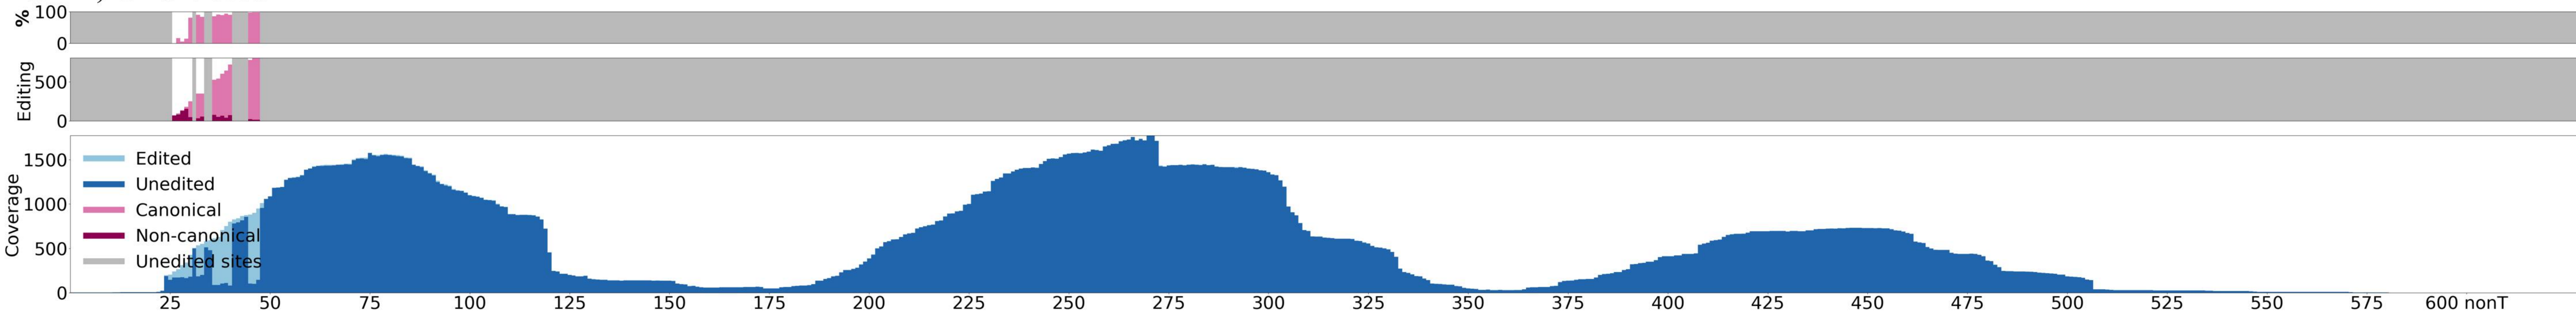

# SYL, MURF2 : fed

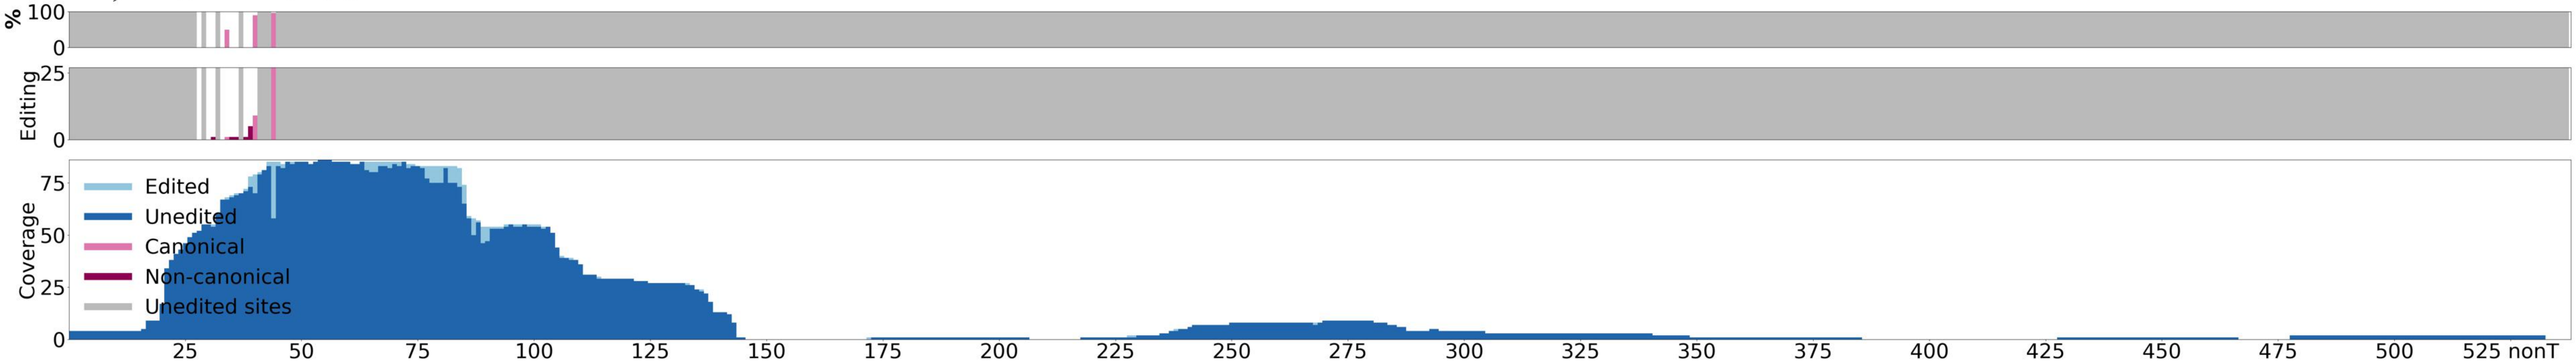

# SYL, MURF2 : fed

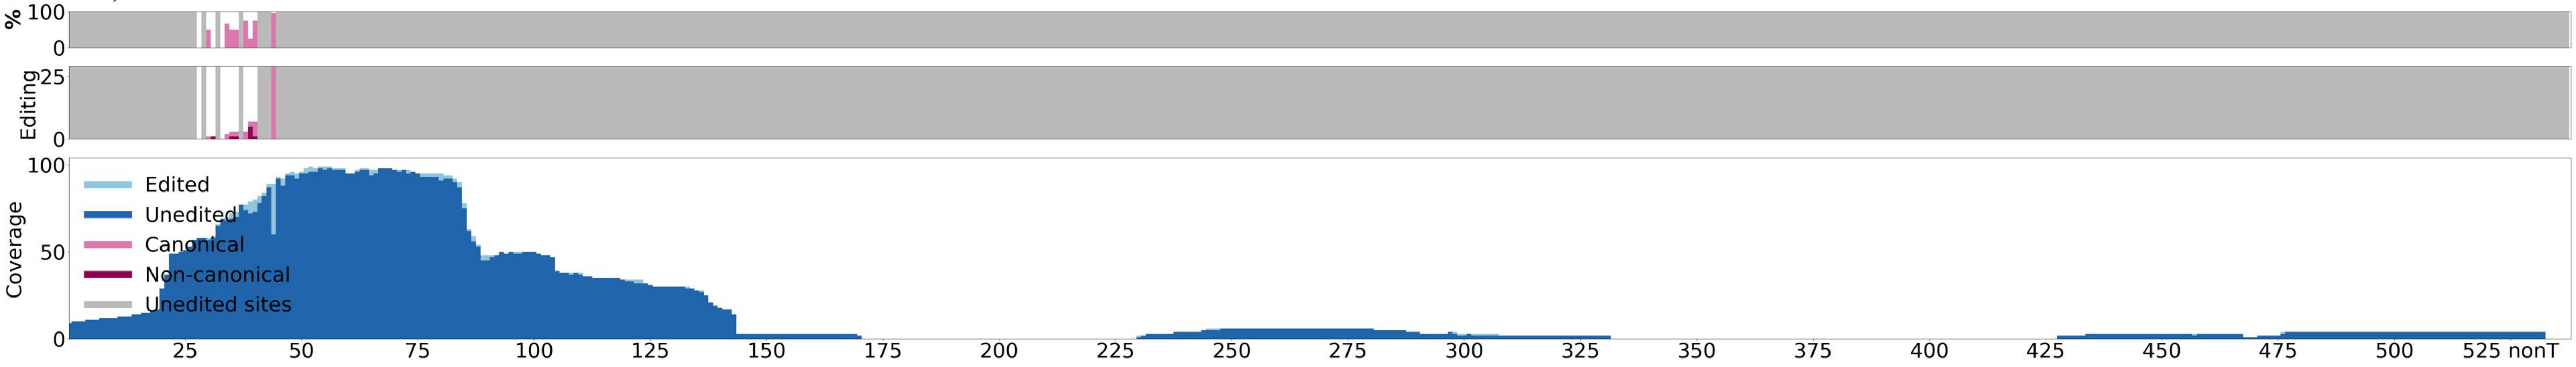

# SYL, MURF2 : abrupt

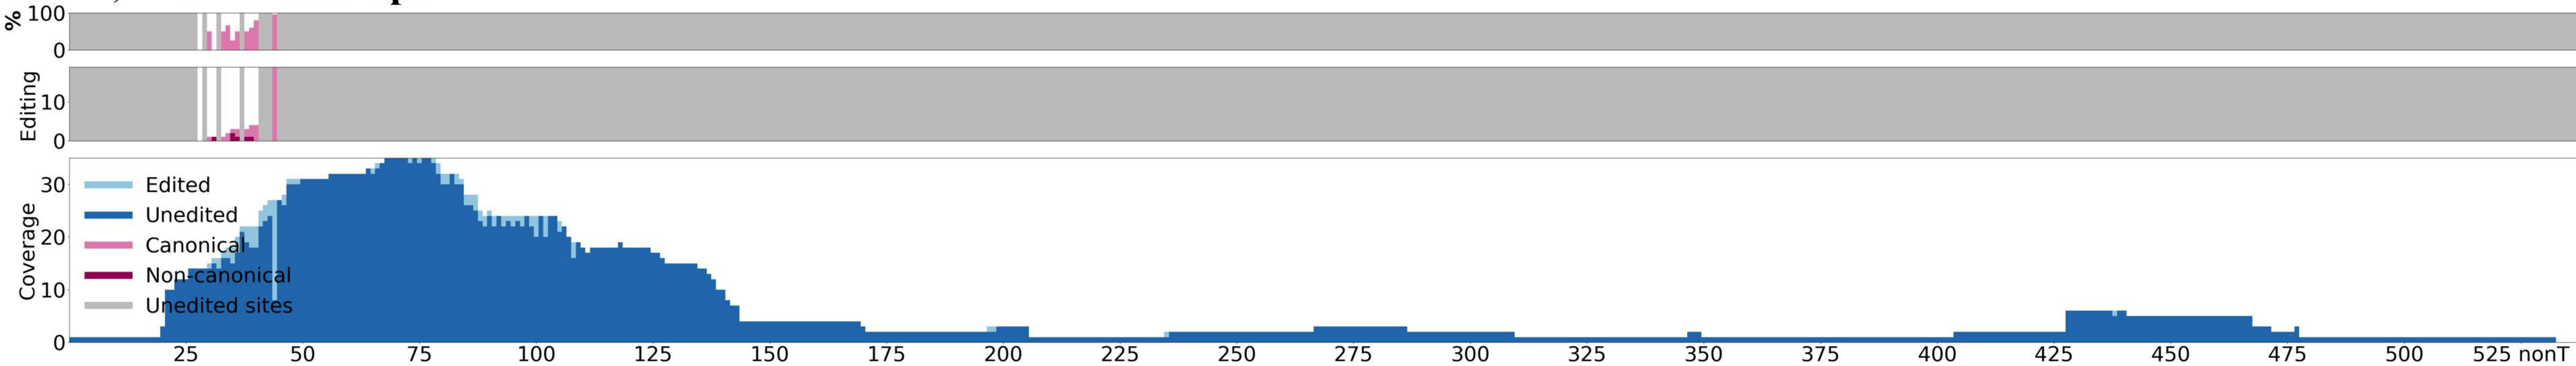

# SYL, MURF2 : abrupt

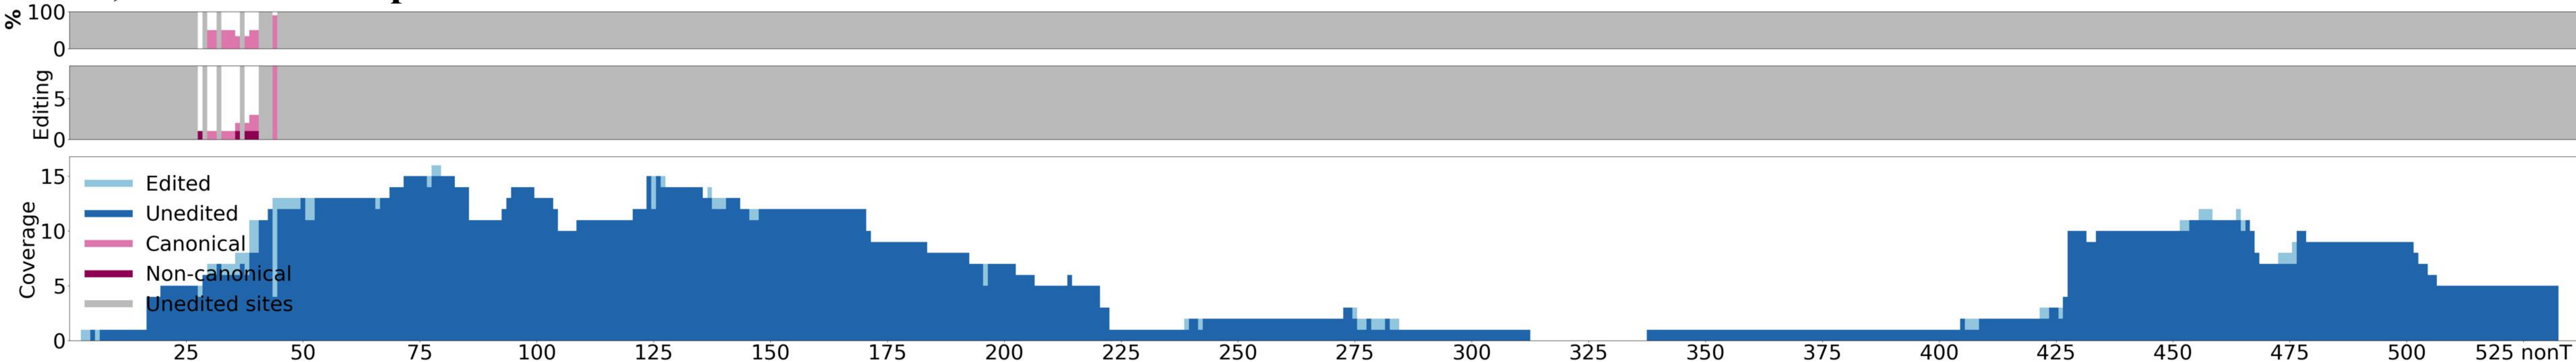

# SYL, MURF2 : slow

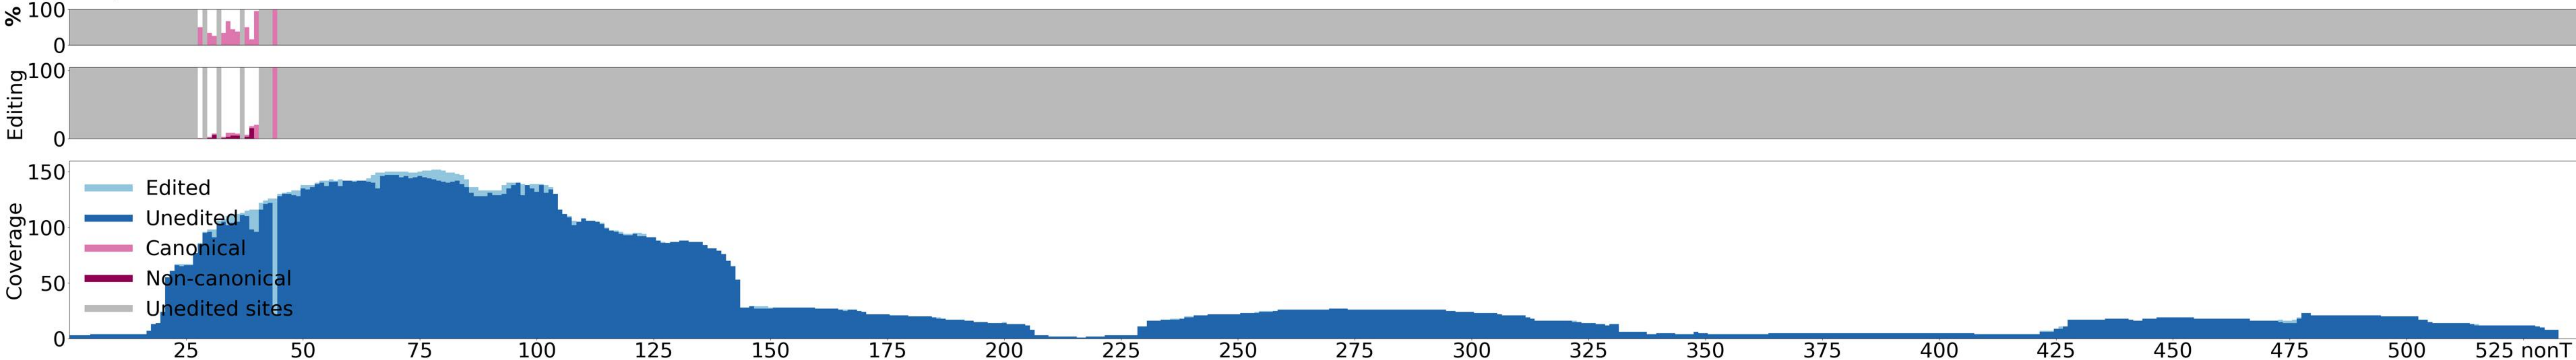

# SYL, MURF2 : slow

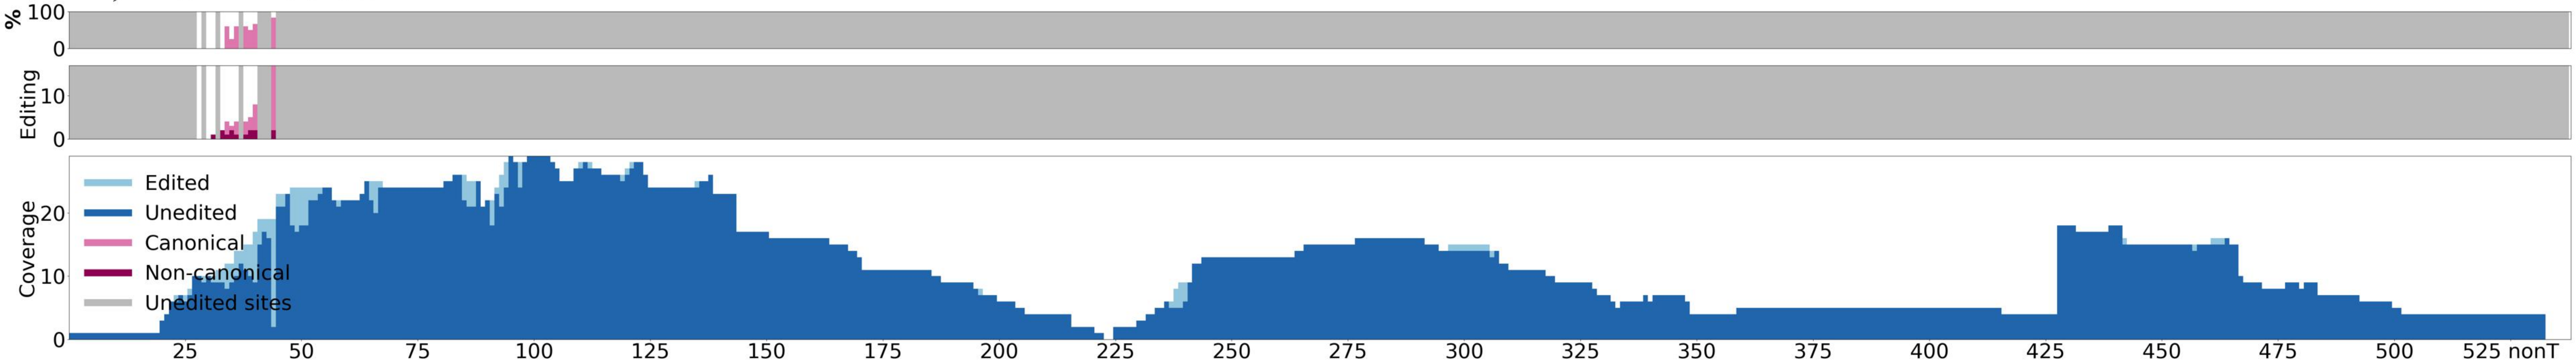

# SYL, MURF2 : mito

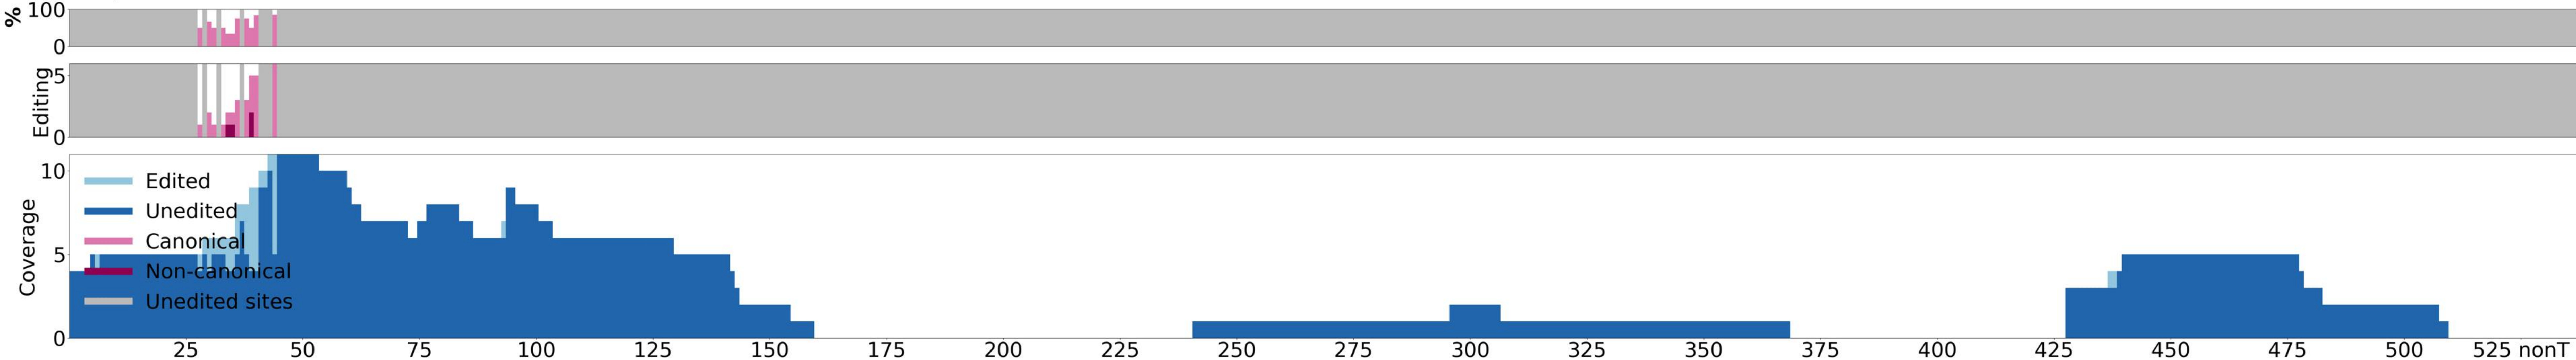

# SYL, MURF2 : mito

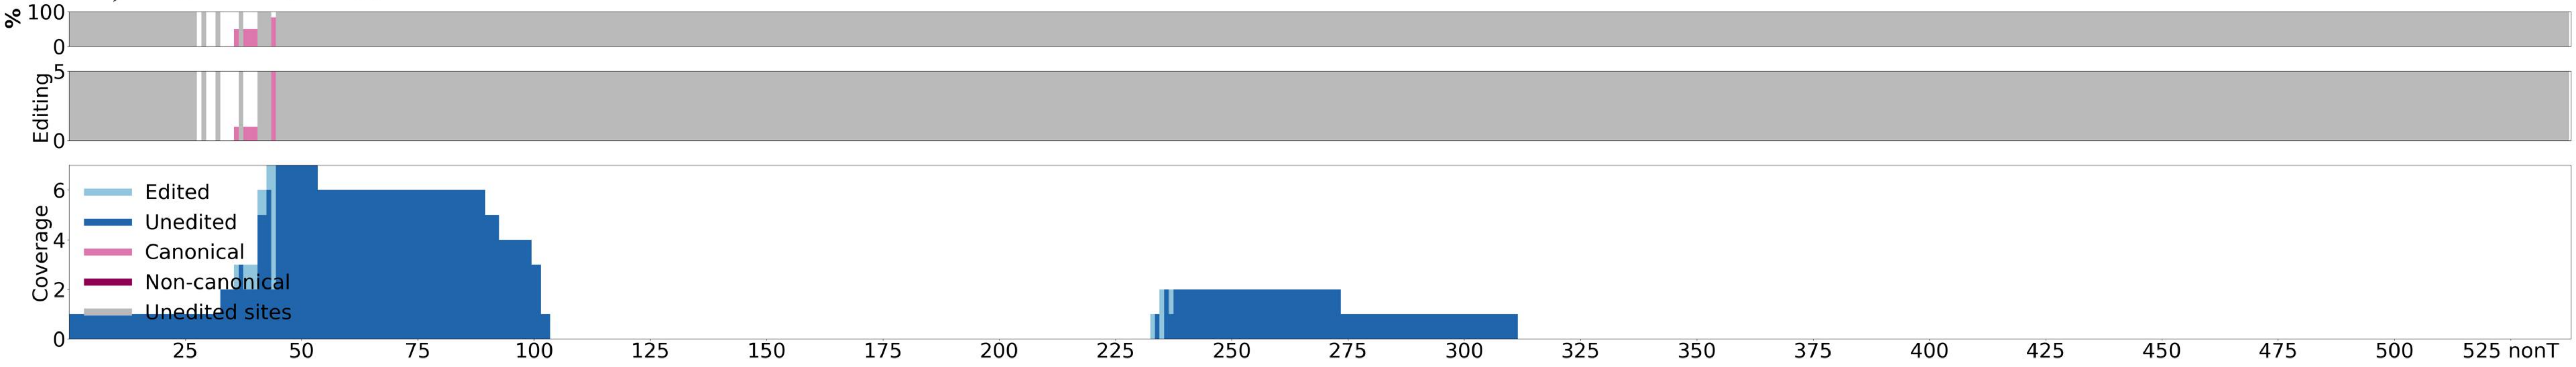

# SYL, MURF2 : total

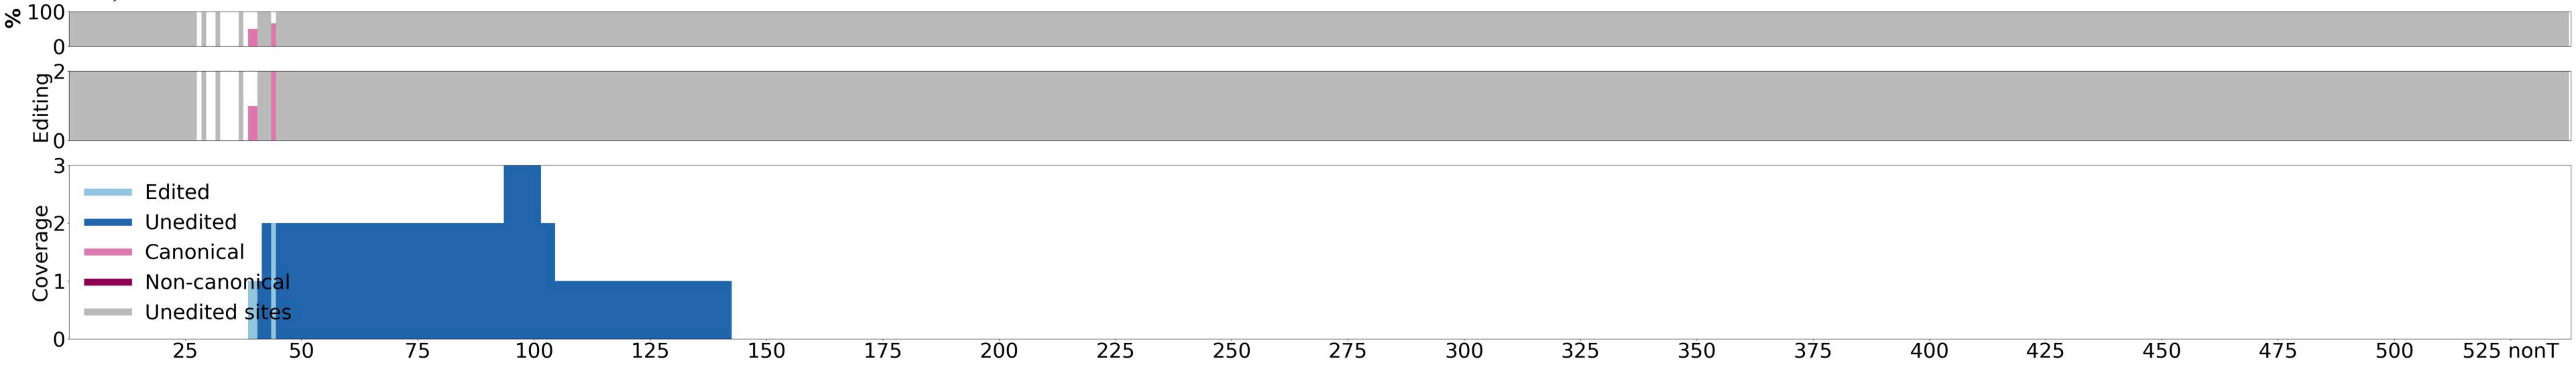

# SYL, MURF2 : total

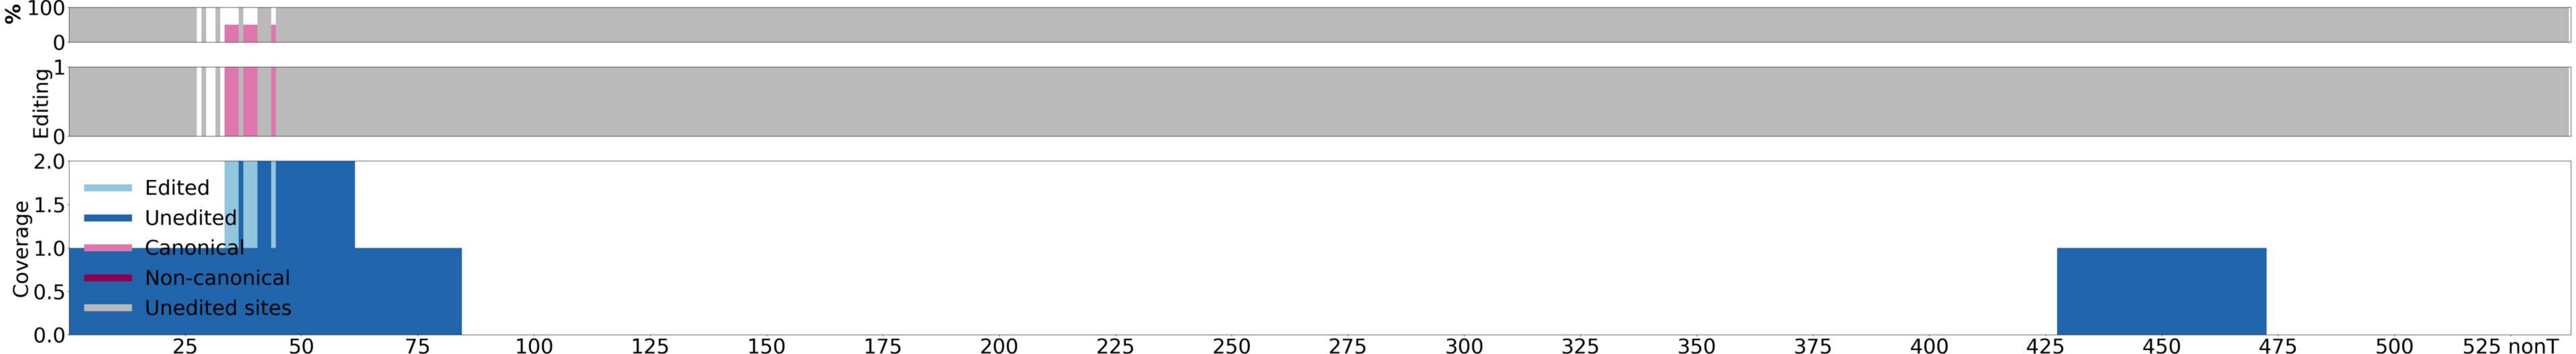

# SYL, ND3 : fed

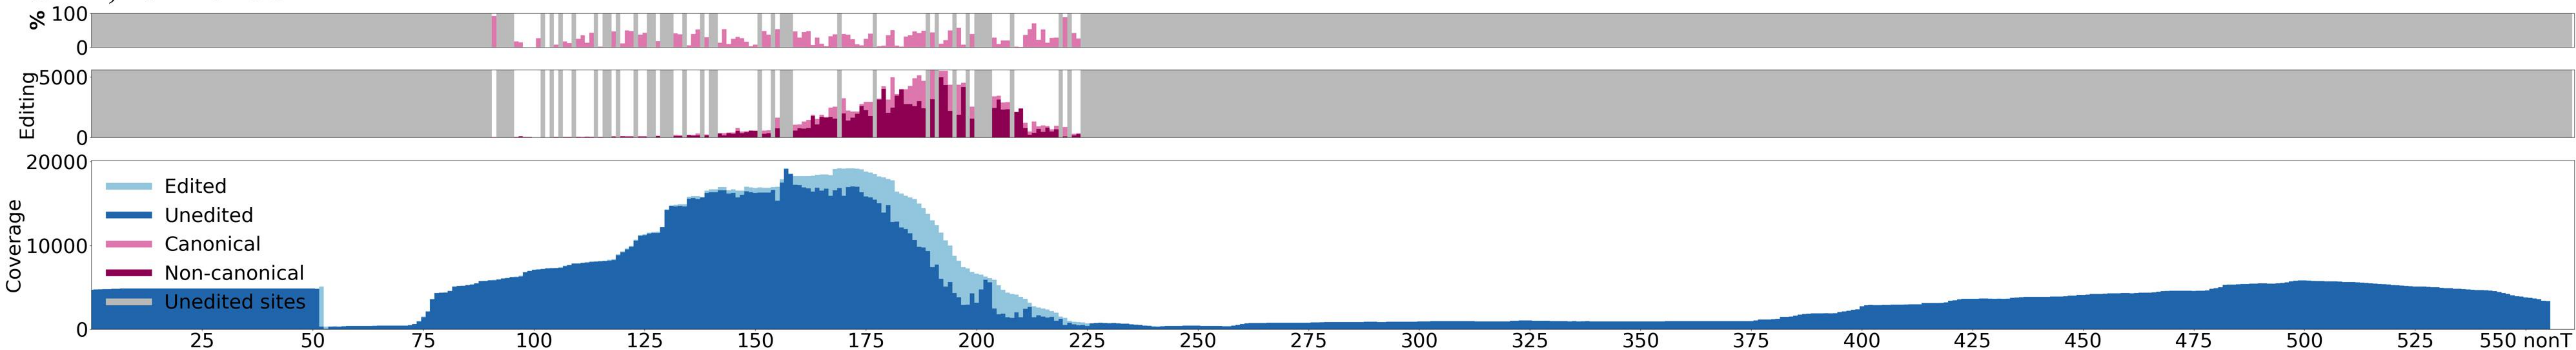

# SYL, ND3 : fed

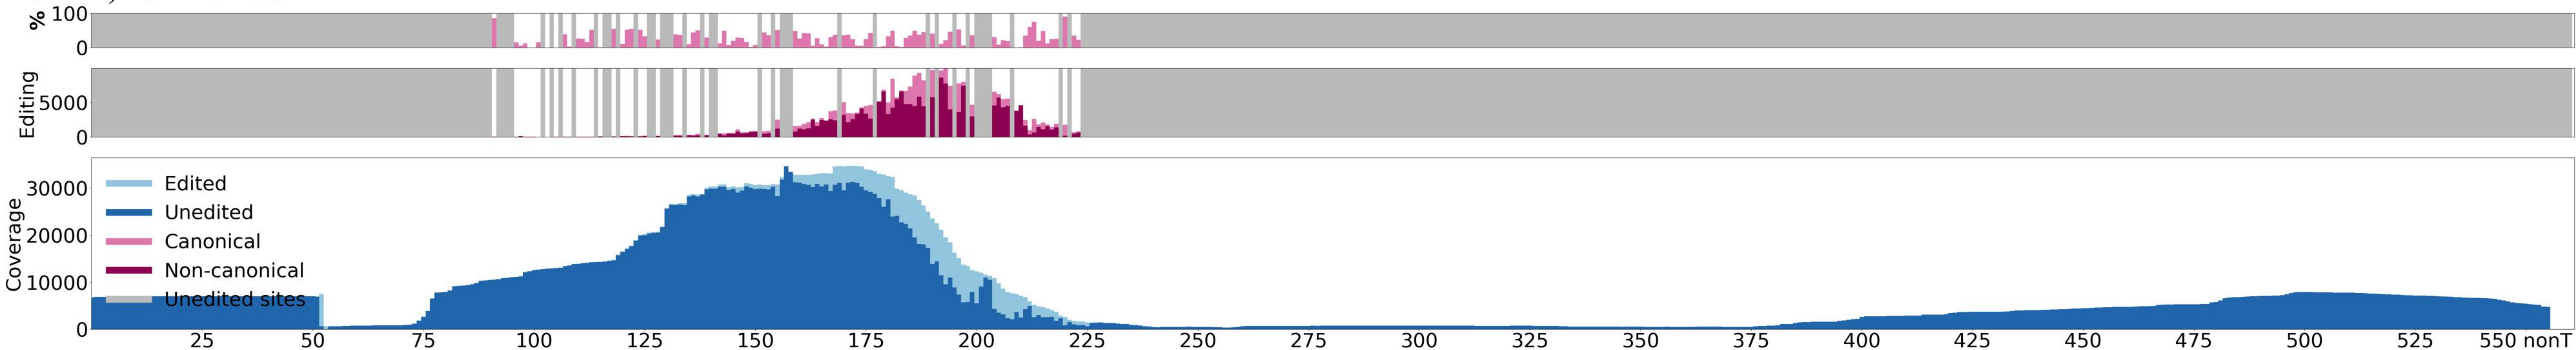

# SYL, ND3 : abrupt

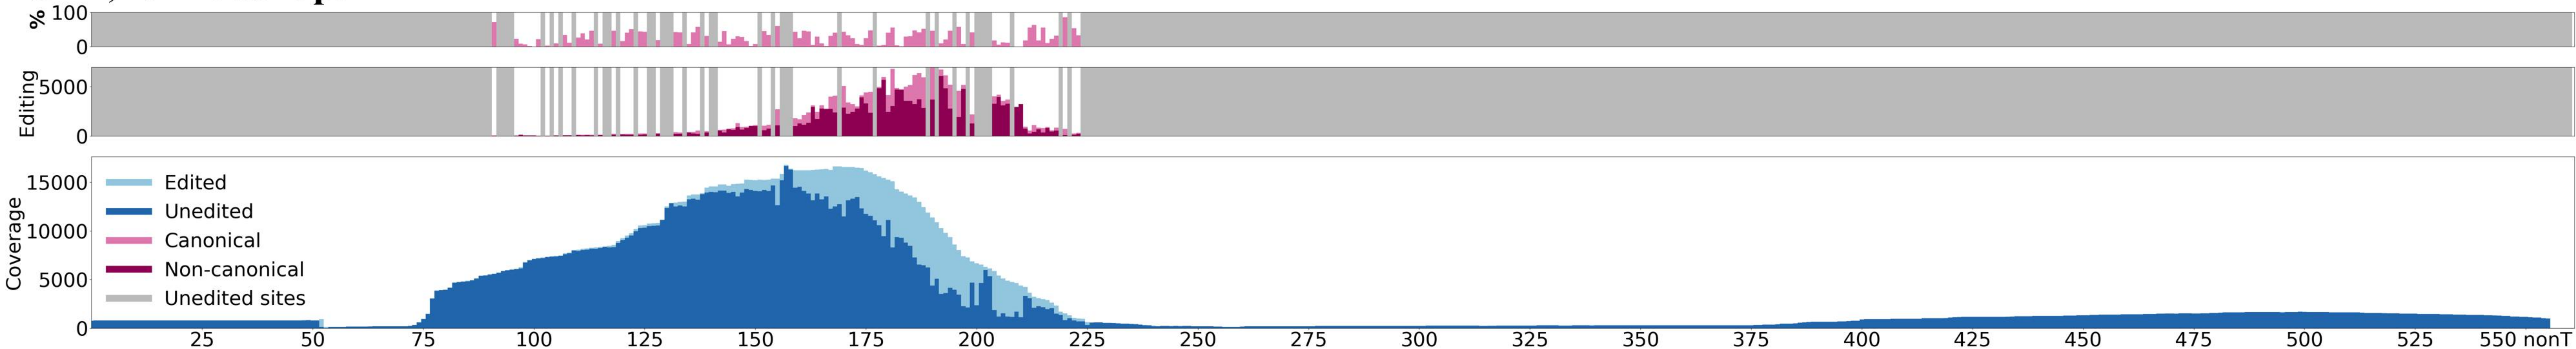

# SYL, ND3 : abrupt

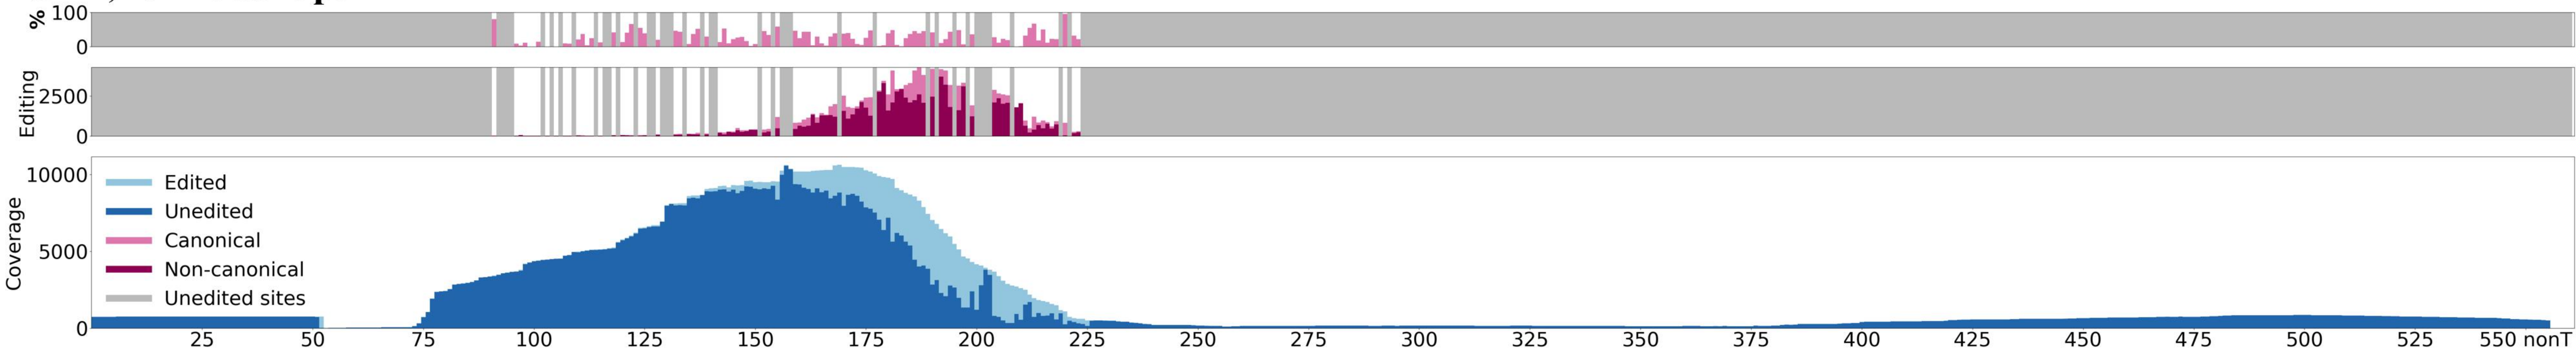

# SYL, ND3 : slow

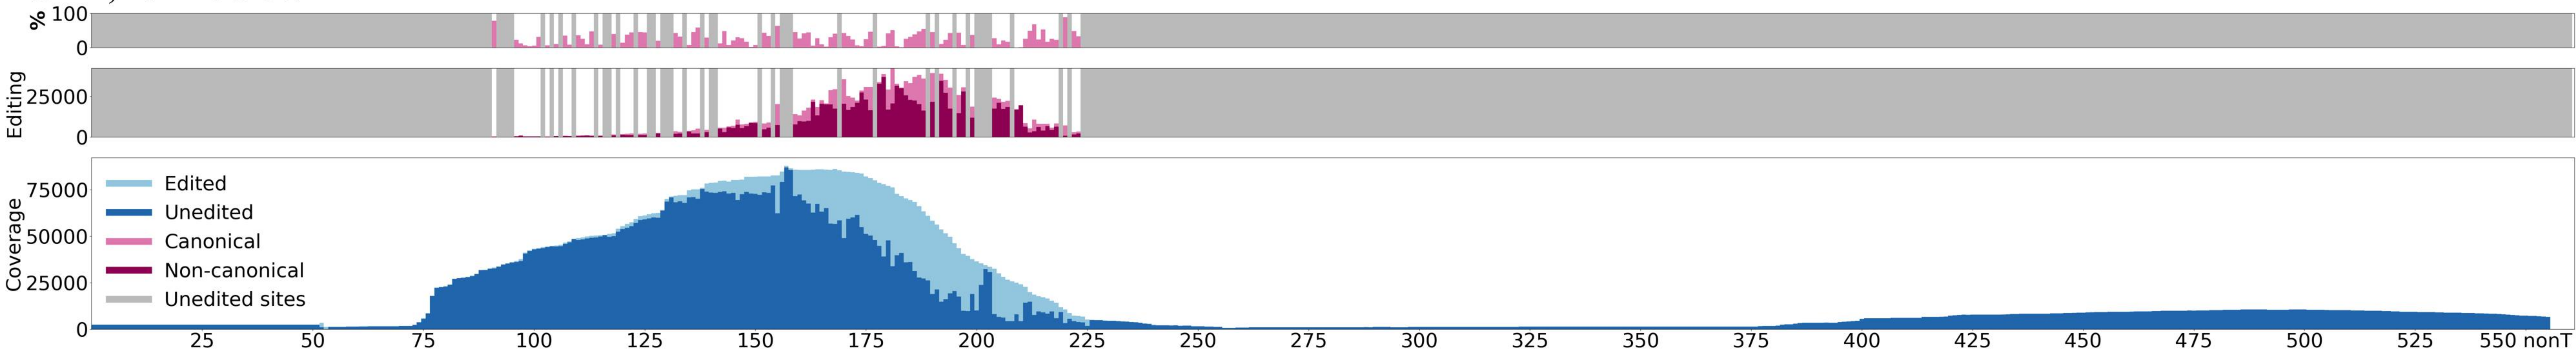

# SYL, ND3 : slow

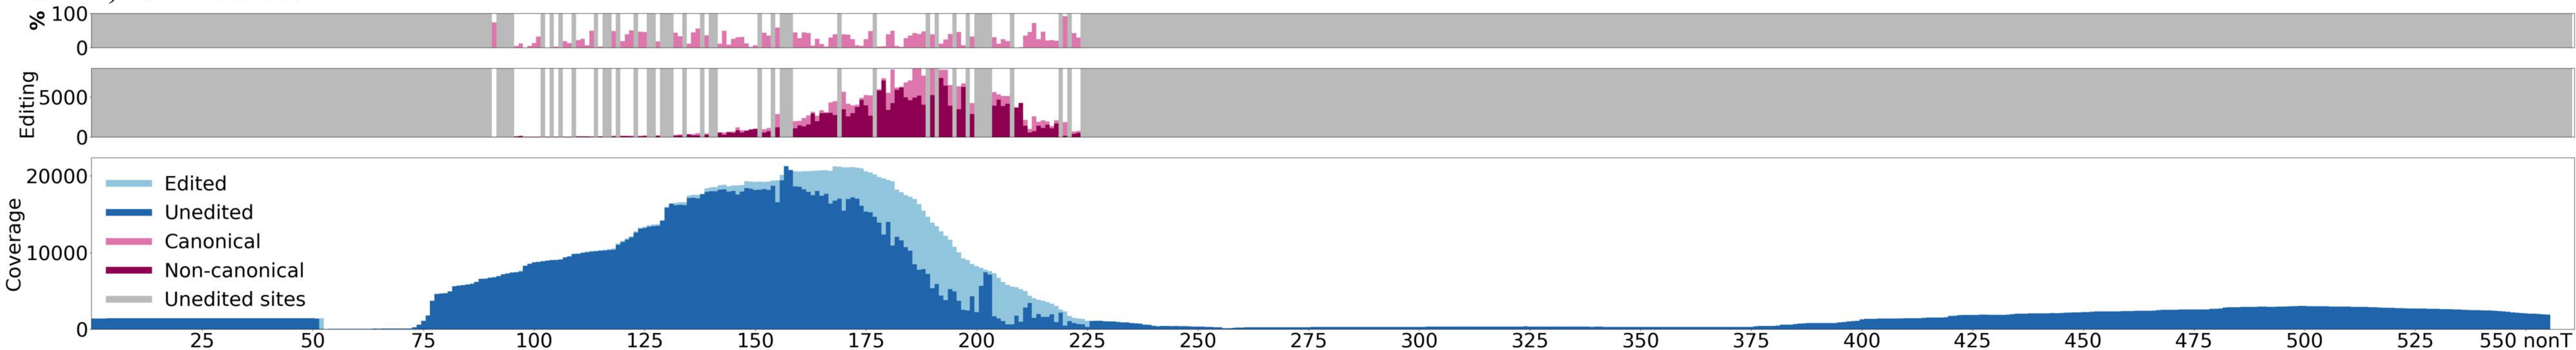

# SYL, ND3 : mito

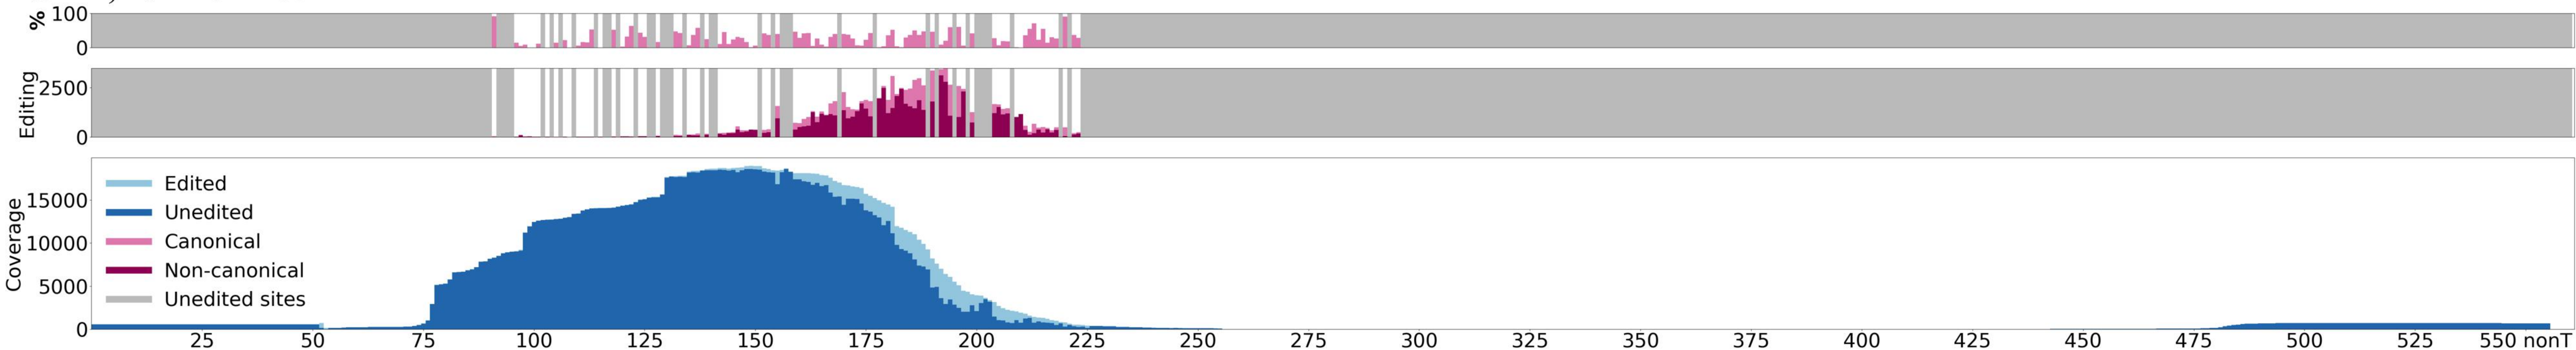

# SYL, ND3 : mito

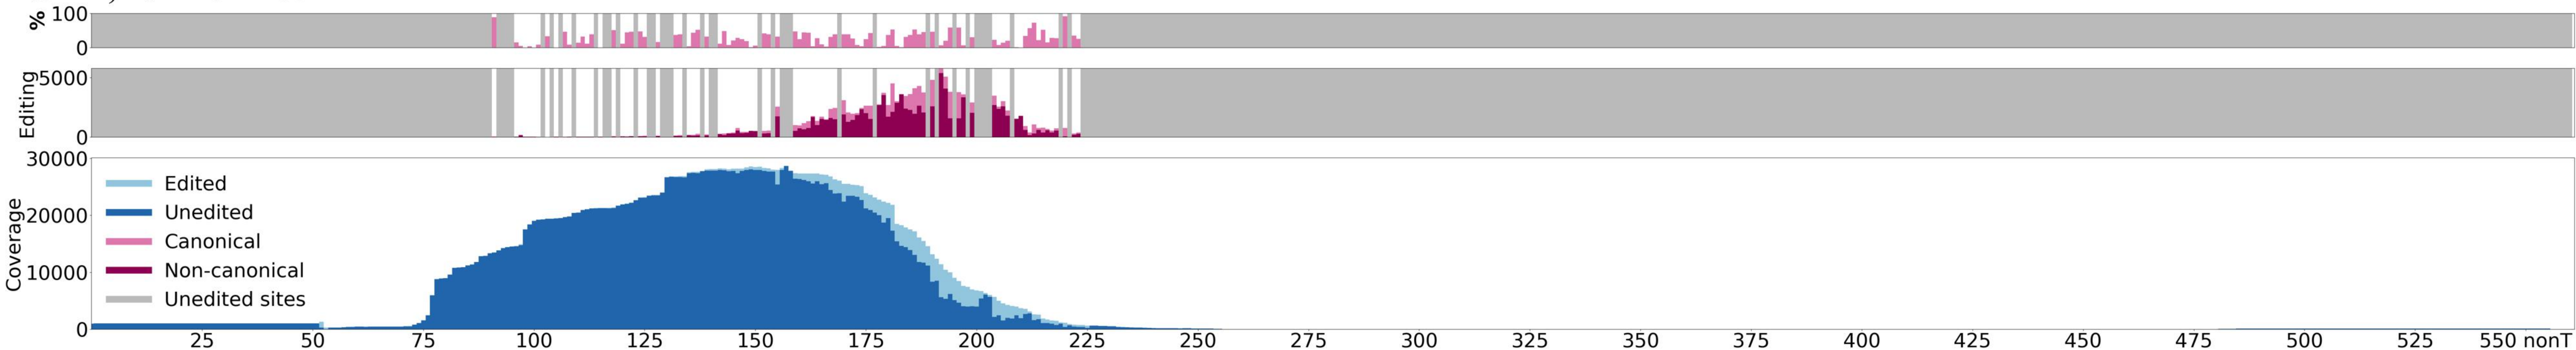

# SYL, ND3 : total

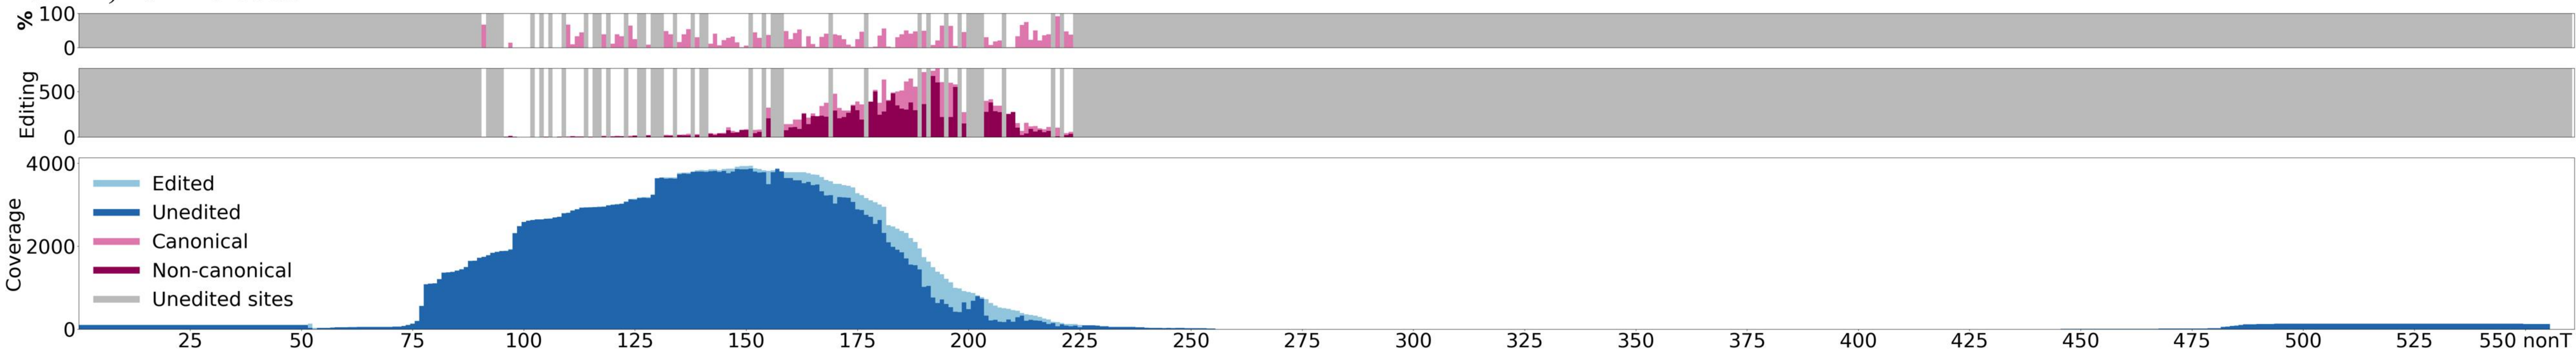

# SYL, ND3 : total

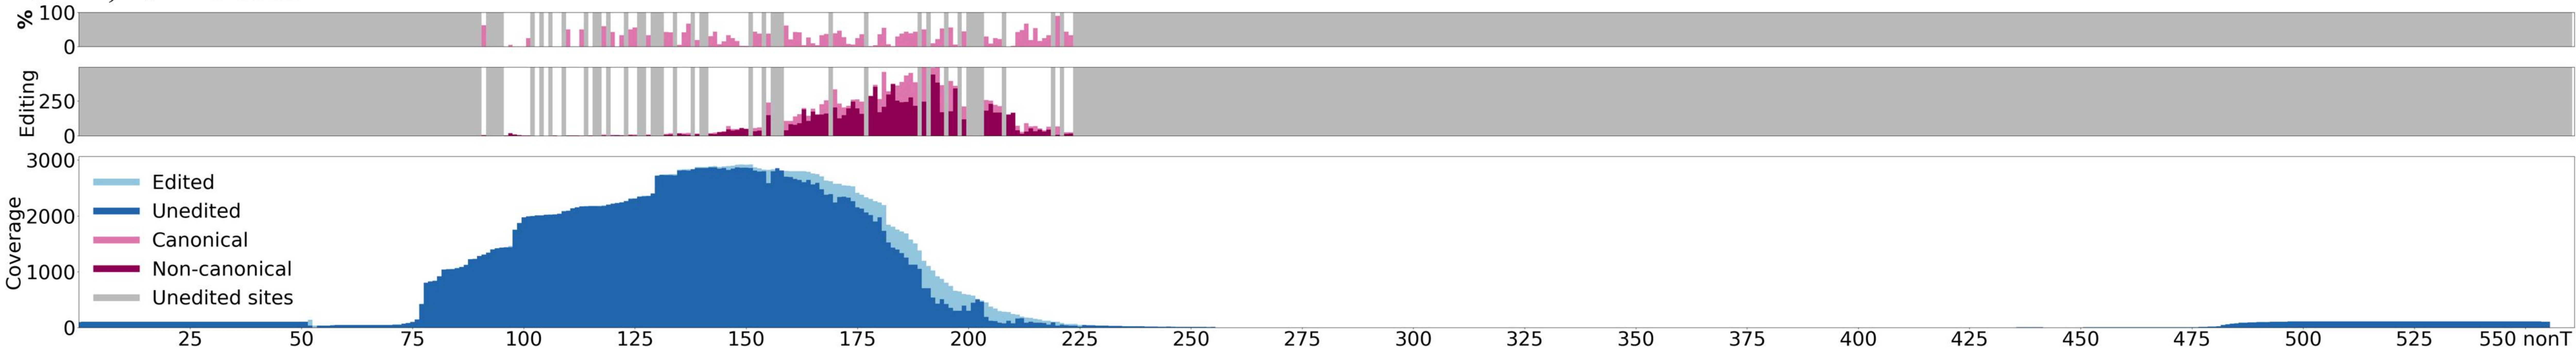

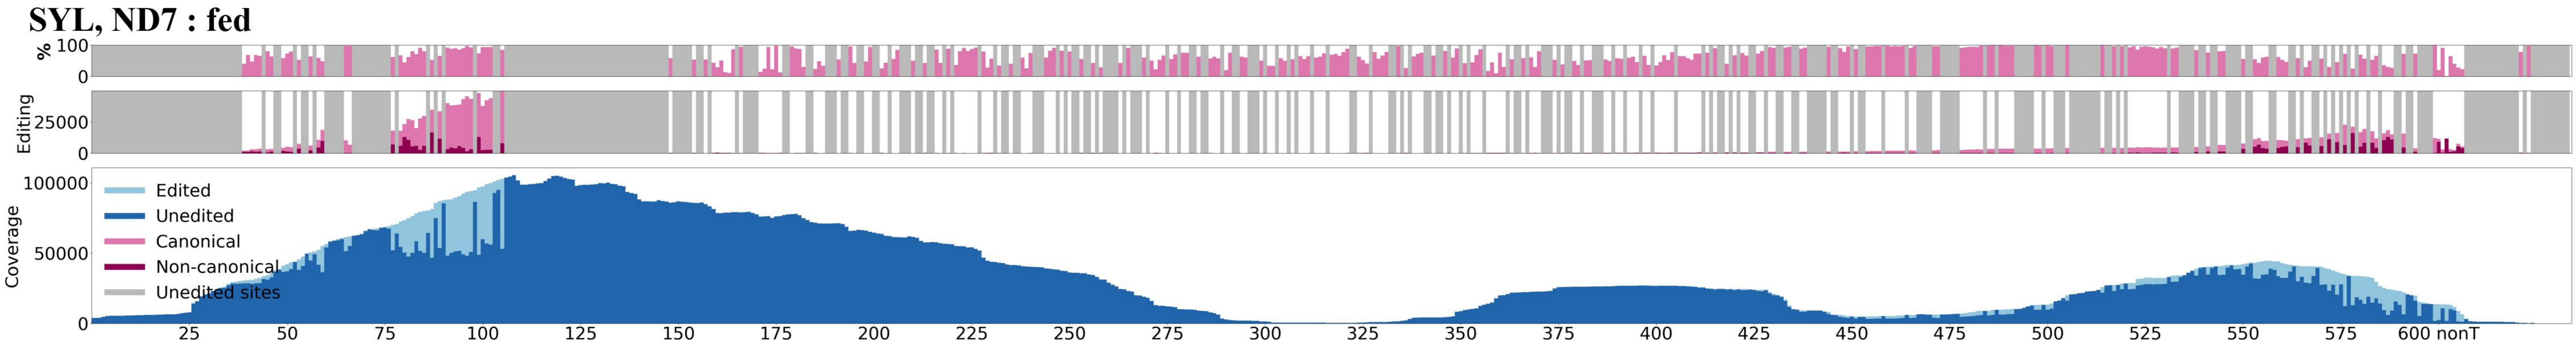

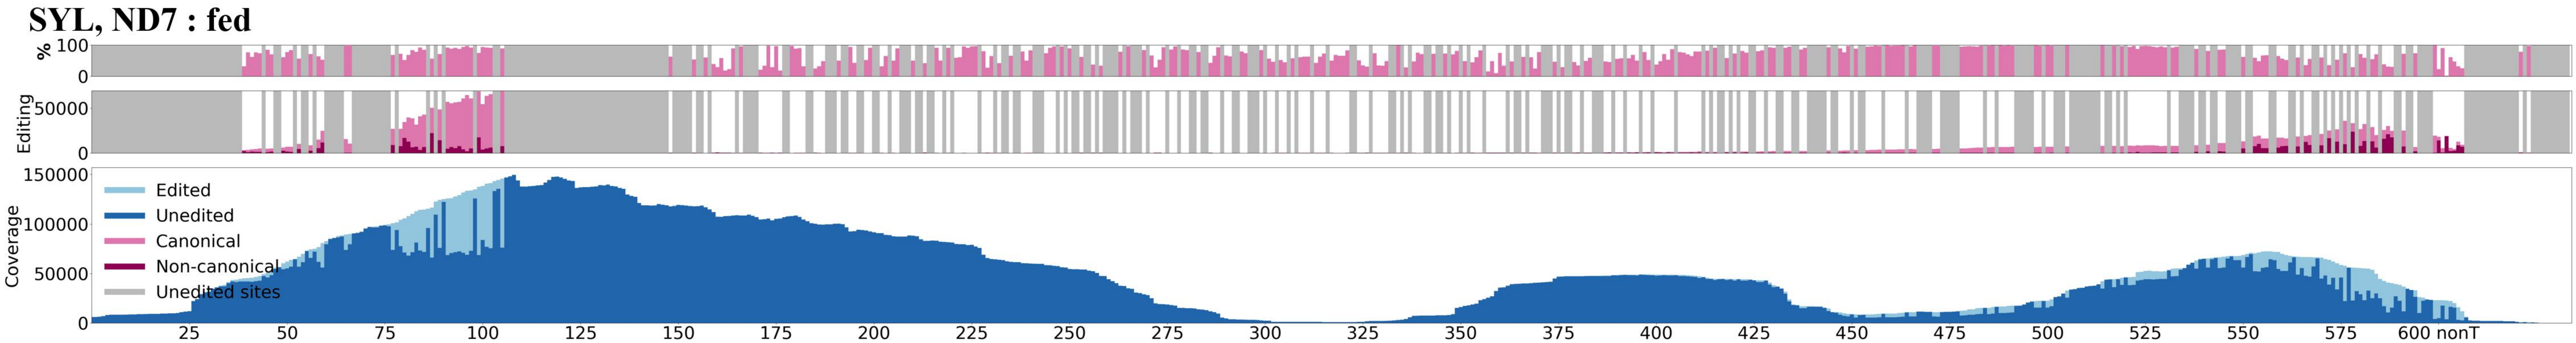

# SYL, ND7 : abrupt

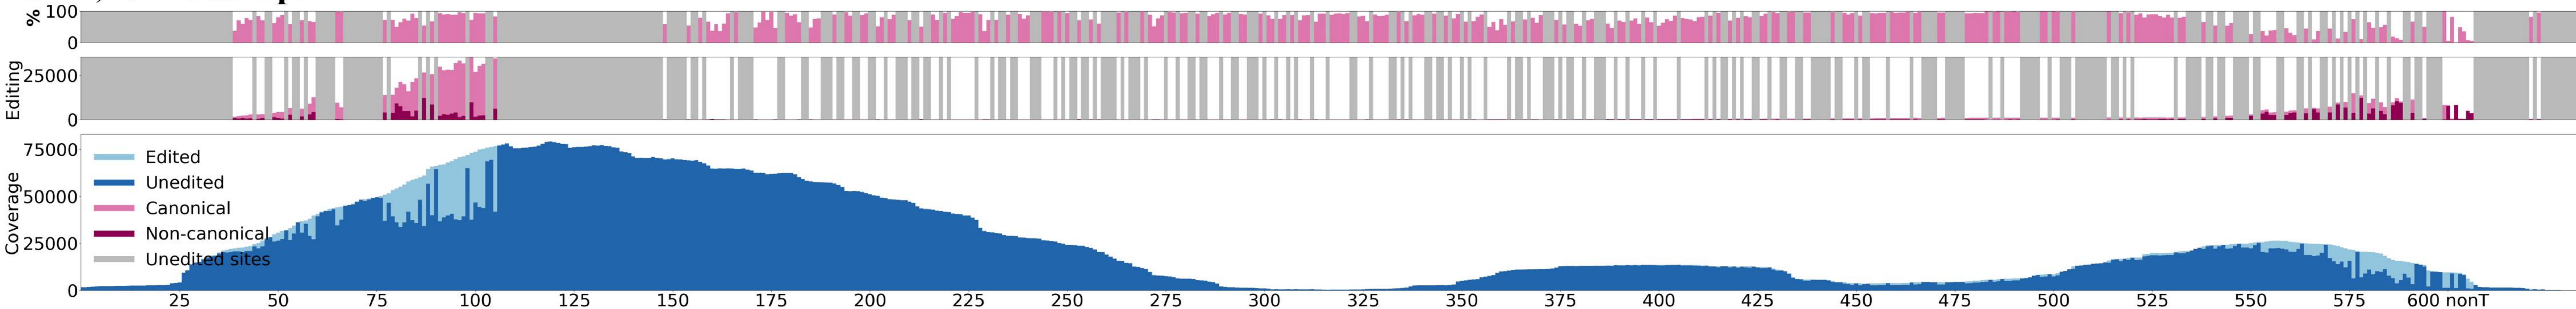

# SYL, ND7 : abrupt

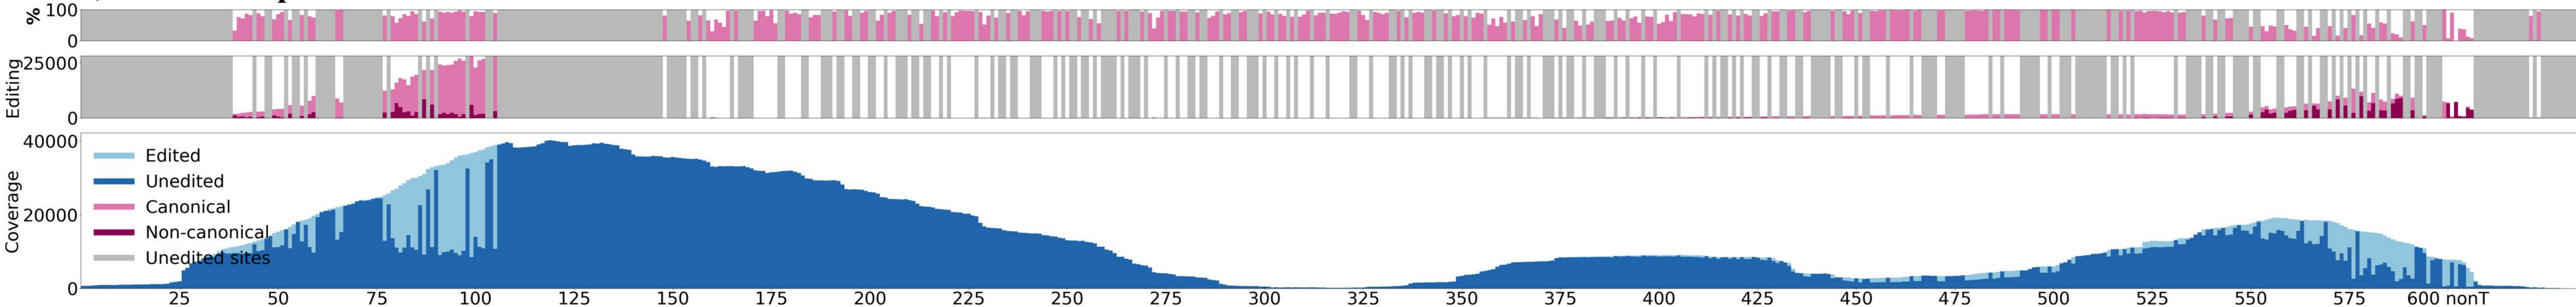

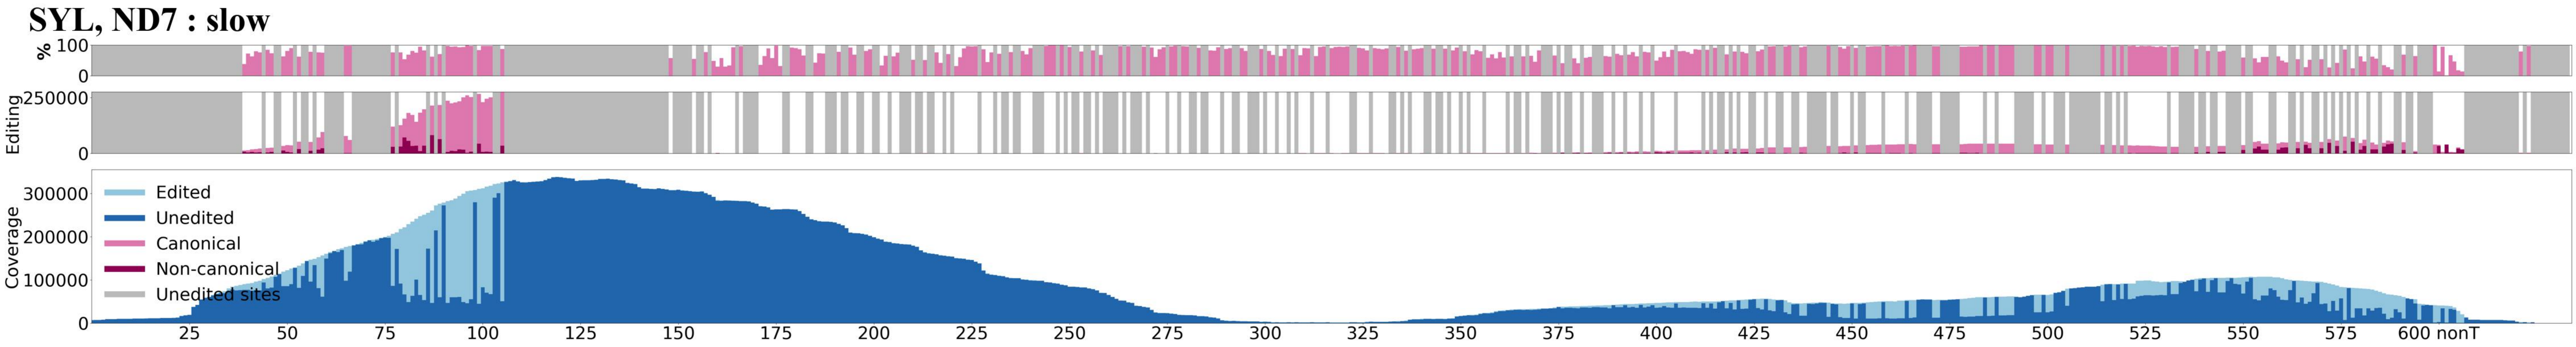

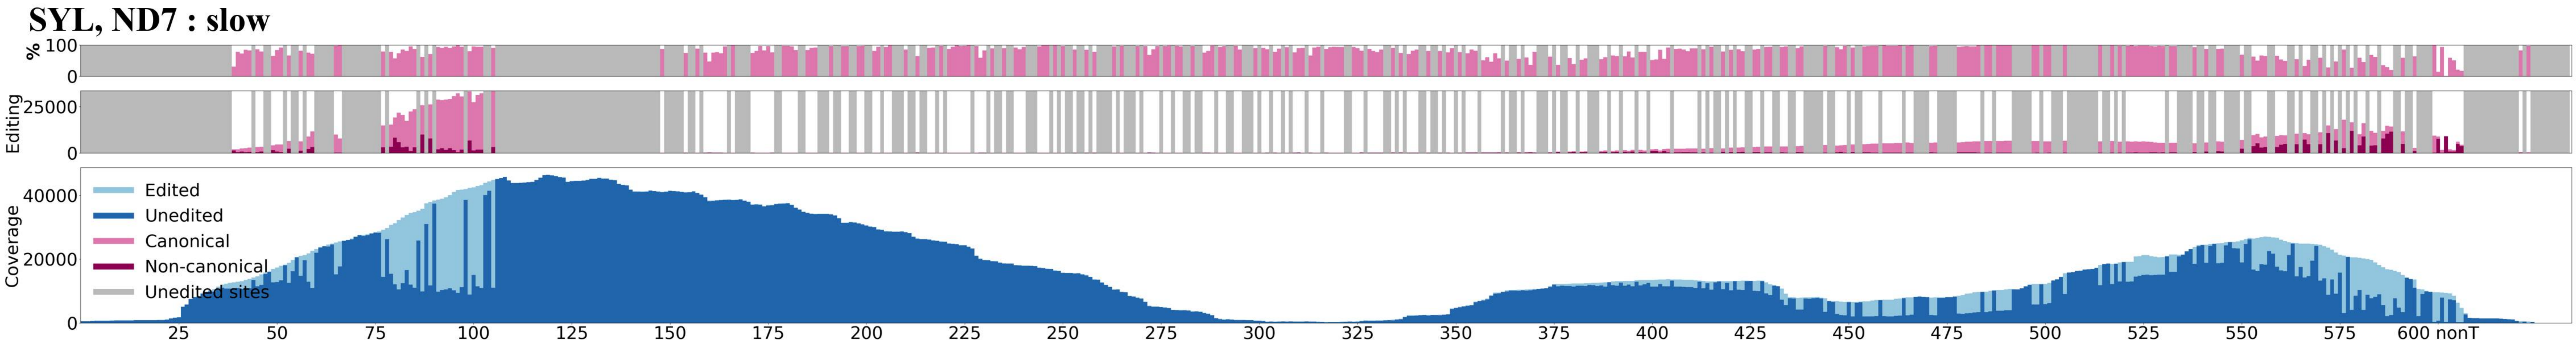

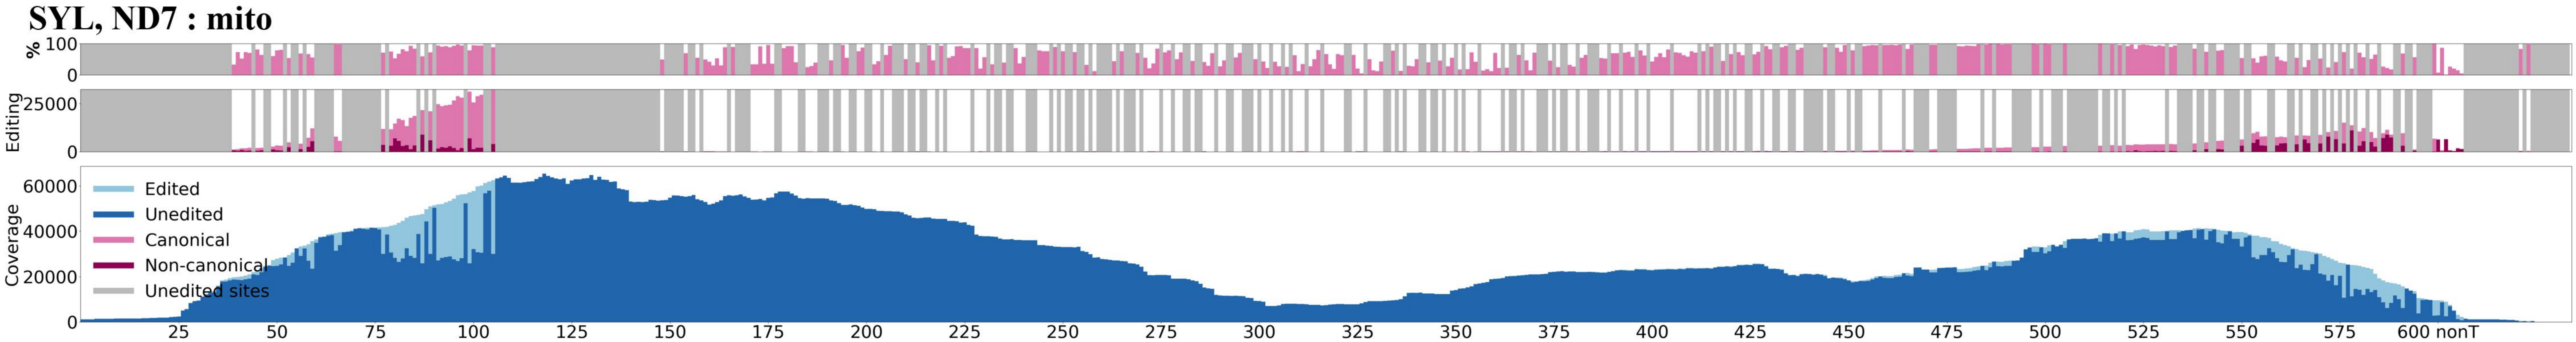

# SYL, ND7 : mito

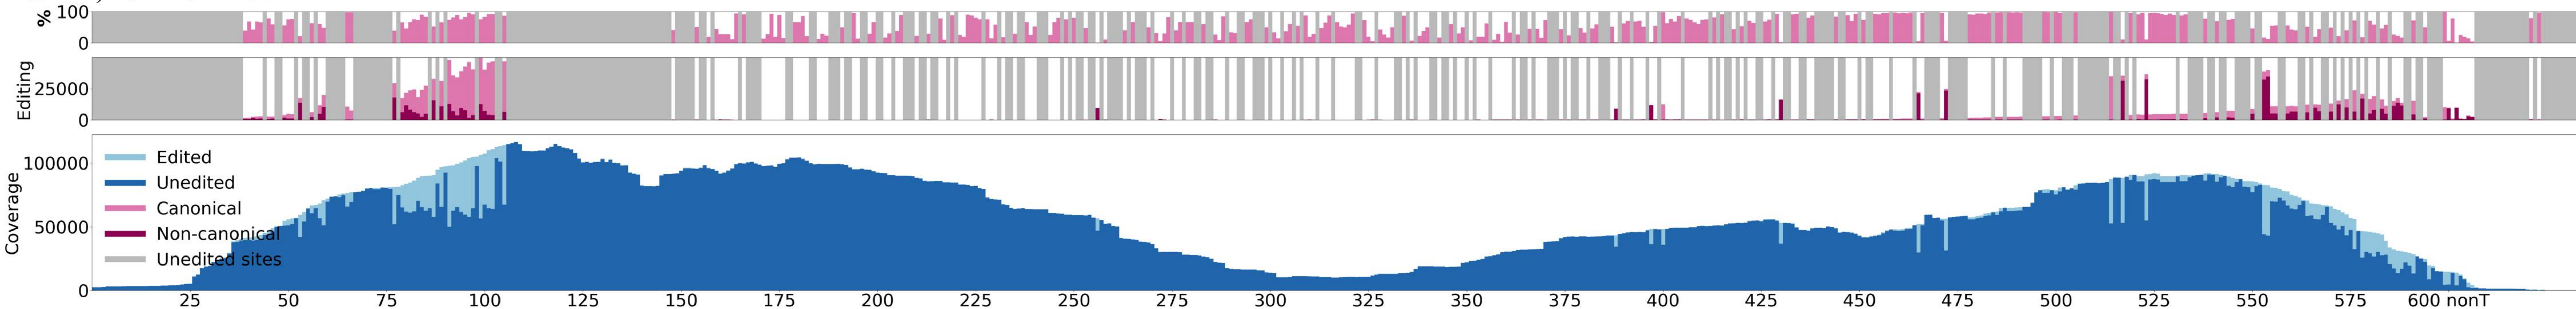

# SYL, ND7 : total

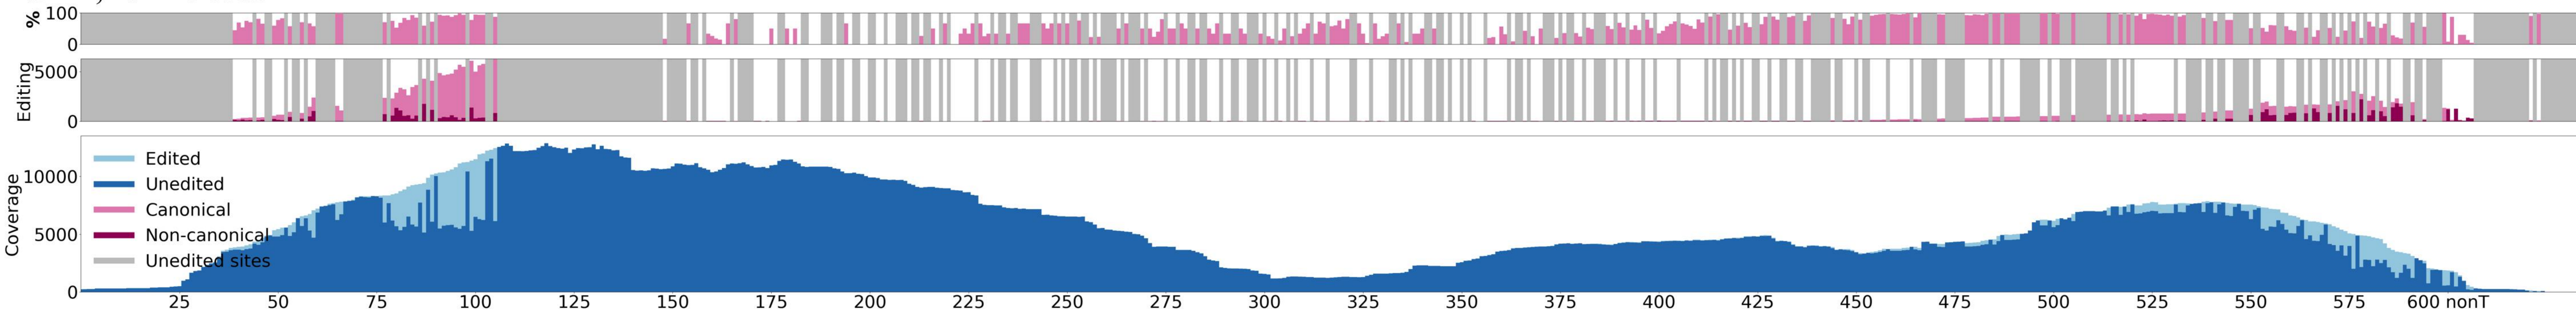

# SYL, ND7 : total

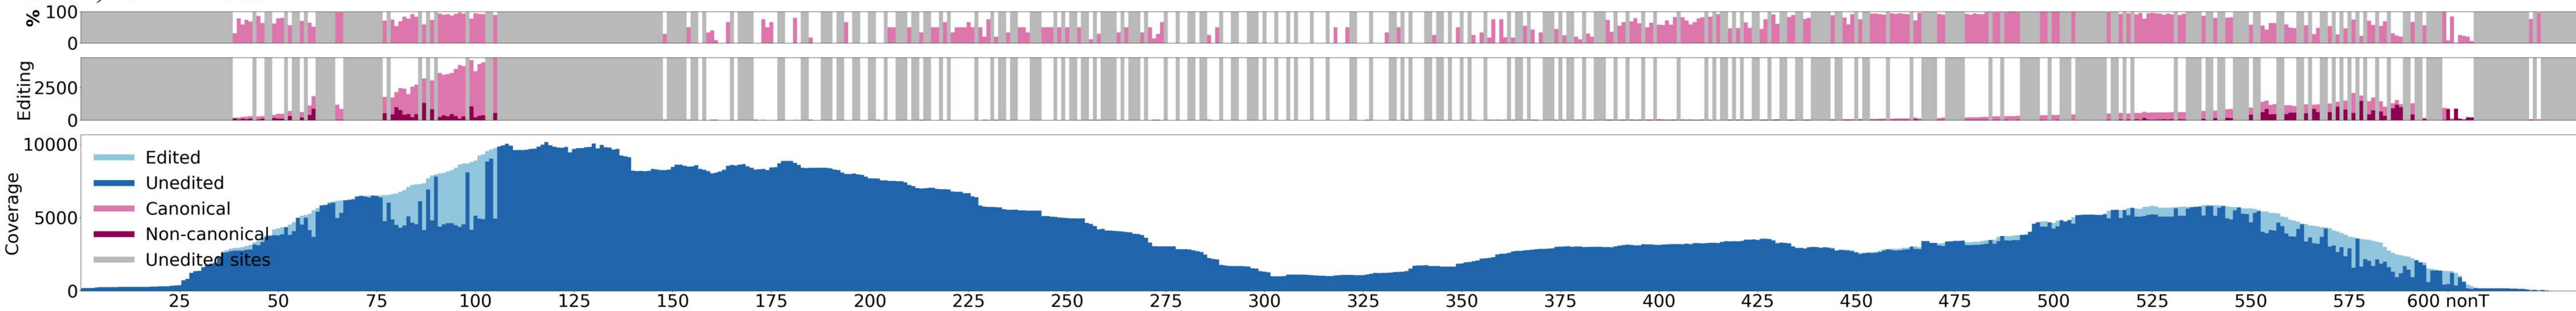

# SYL, ND8 : fed

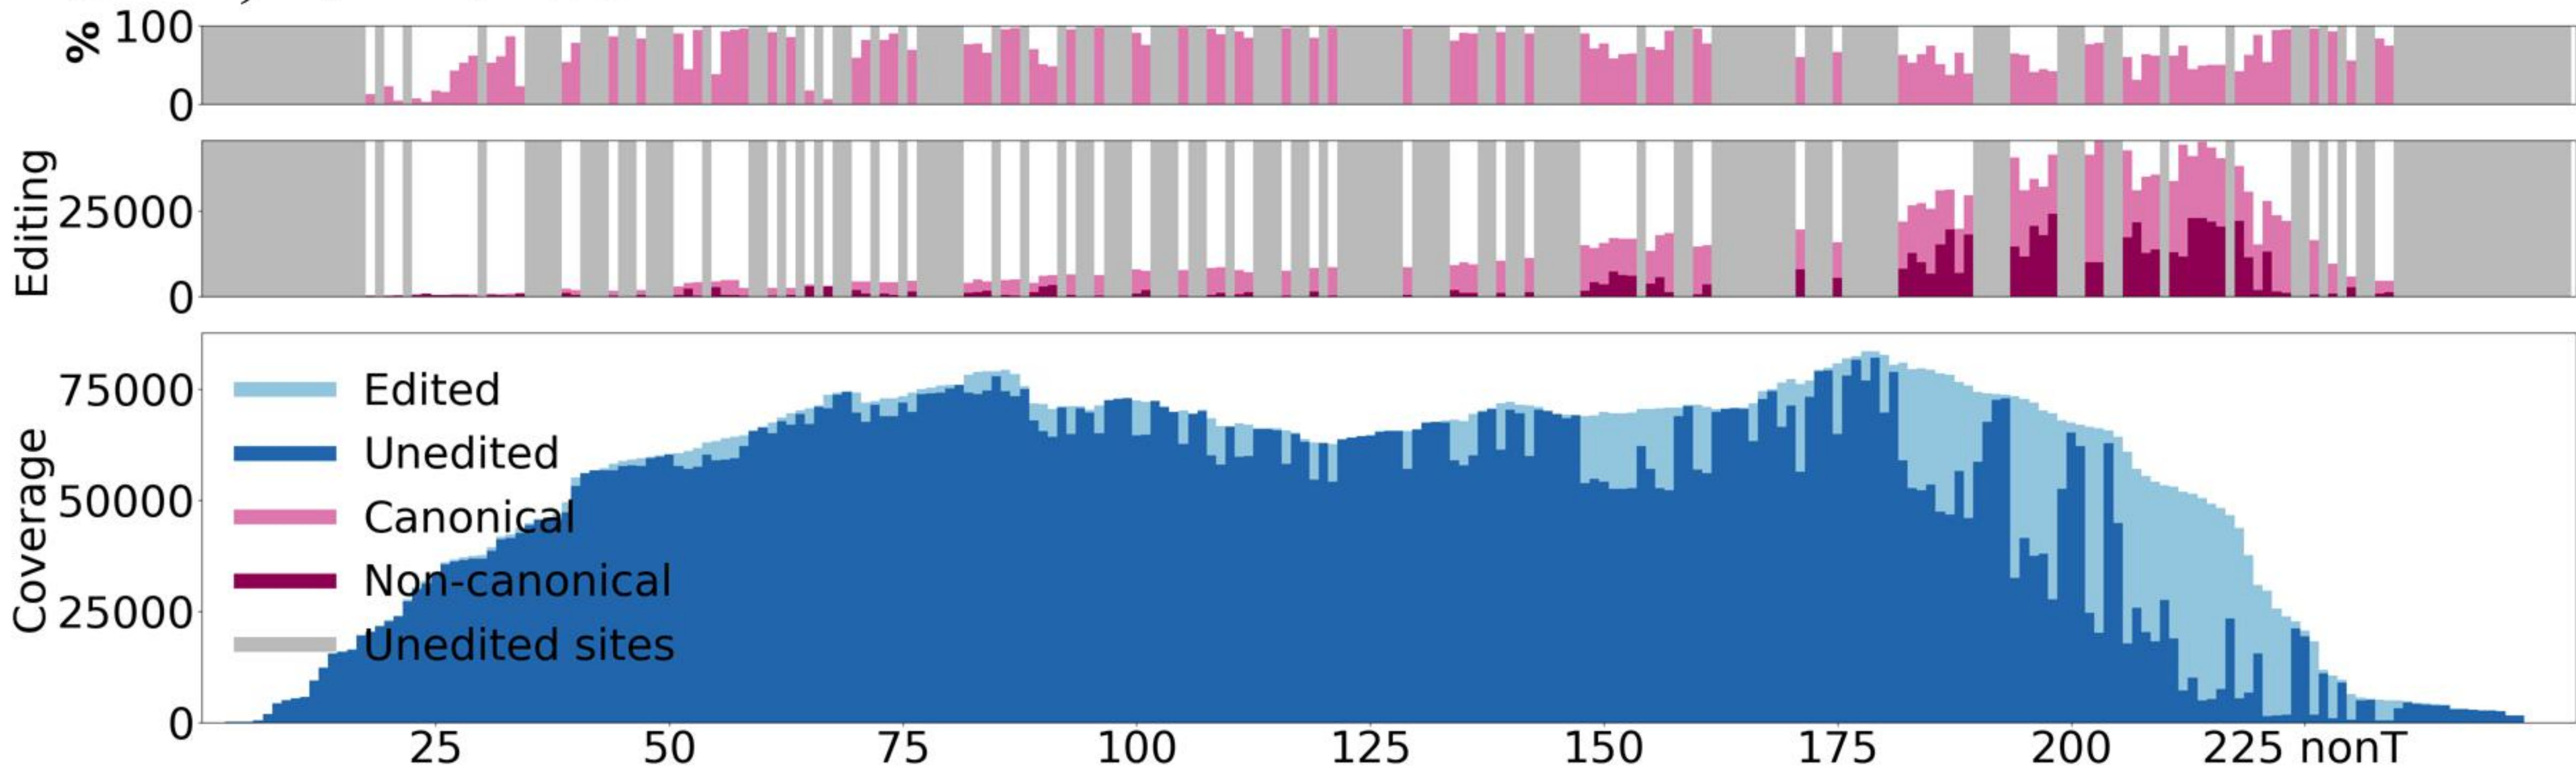

# SYL, ND8 : fed

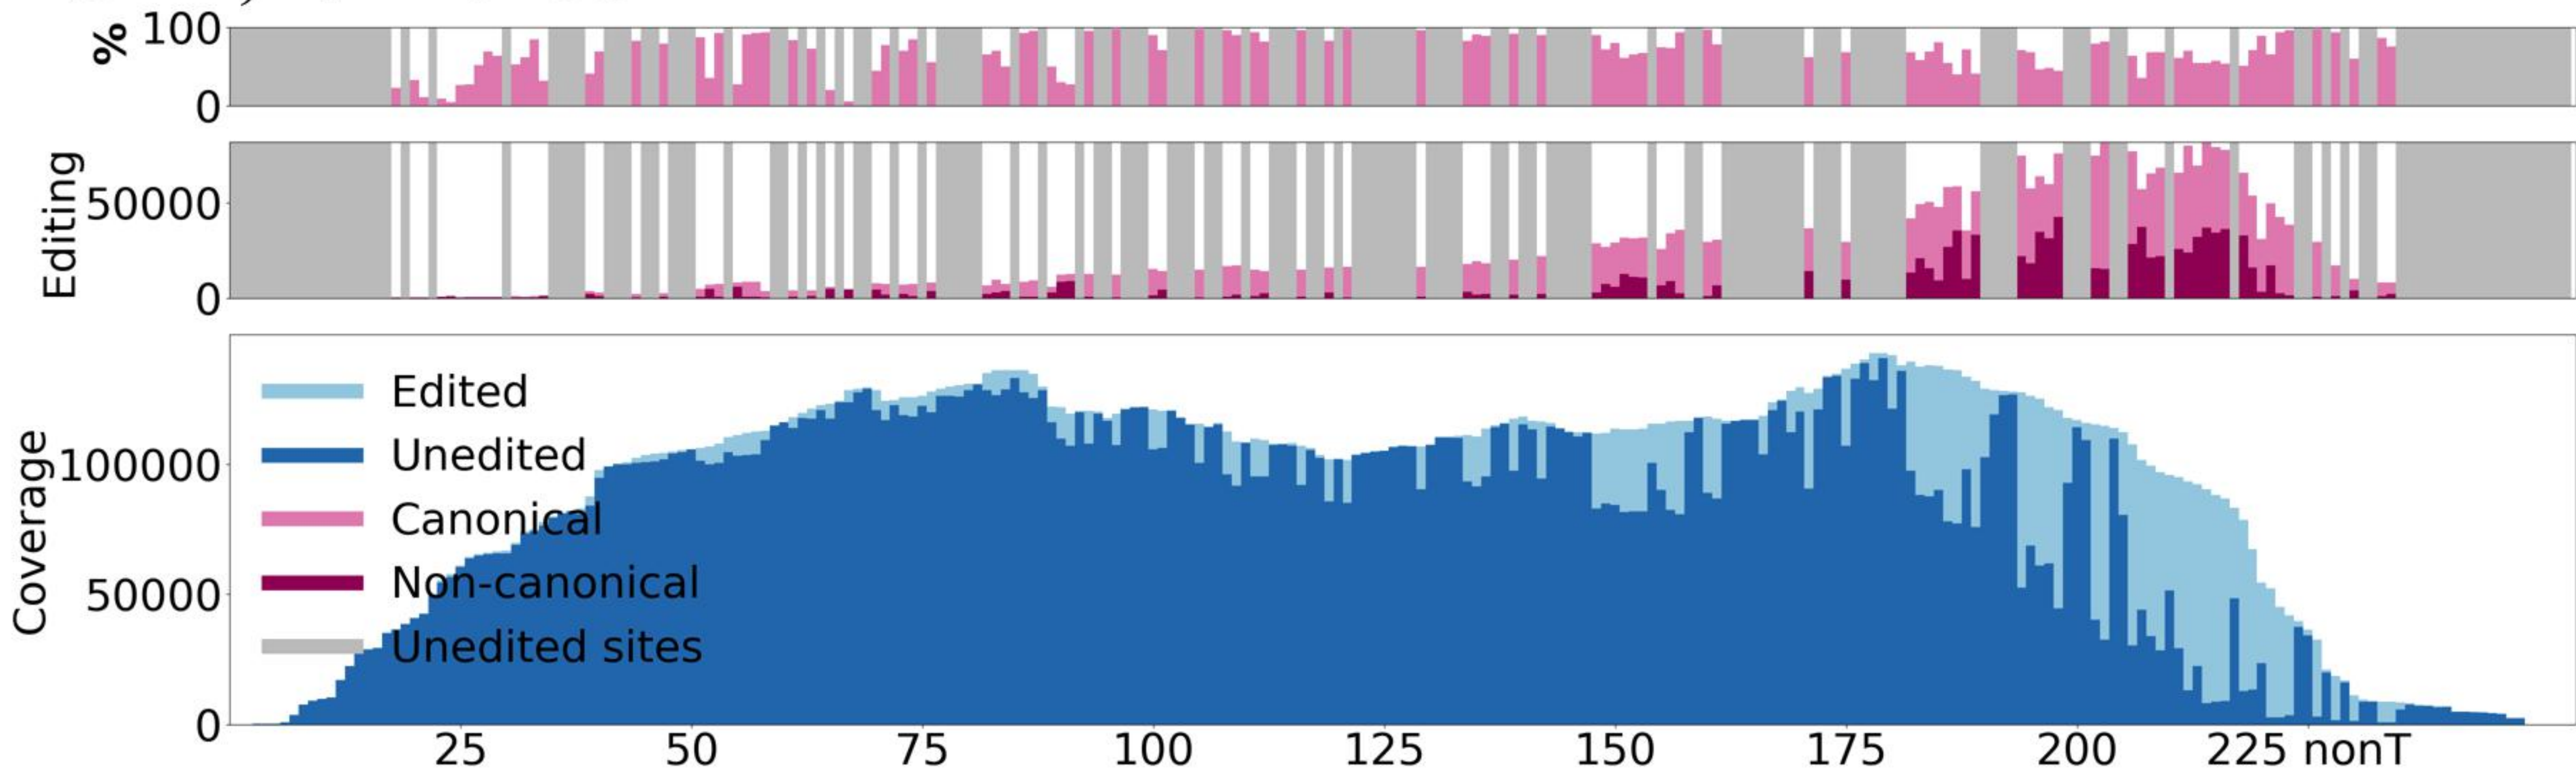

# SYL, ND8 : abrupt

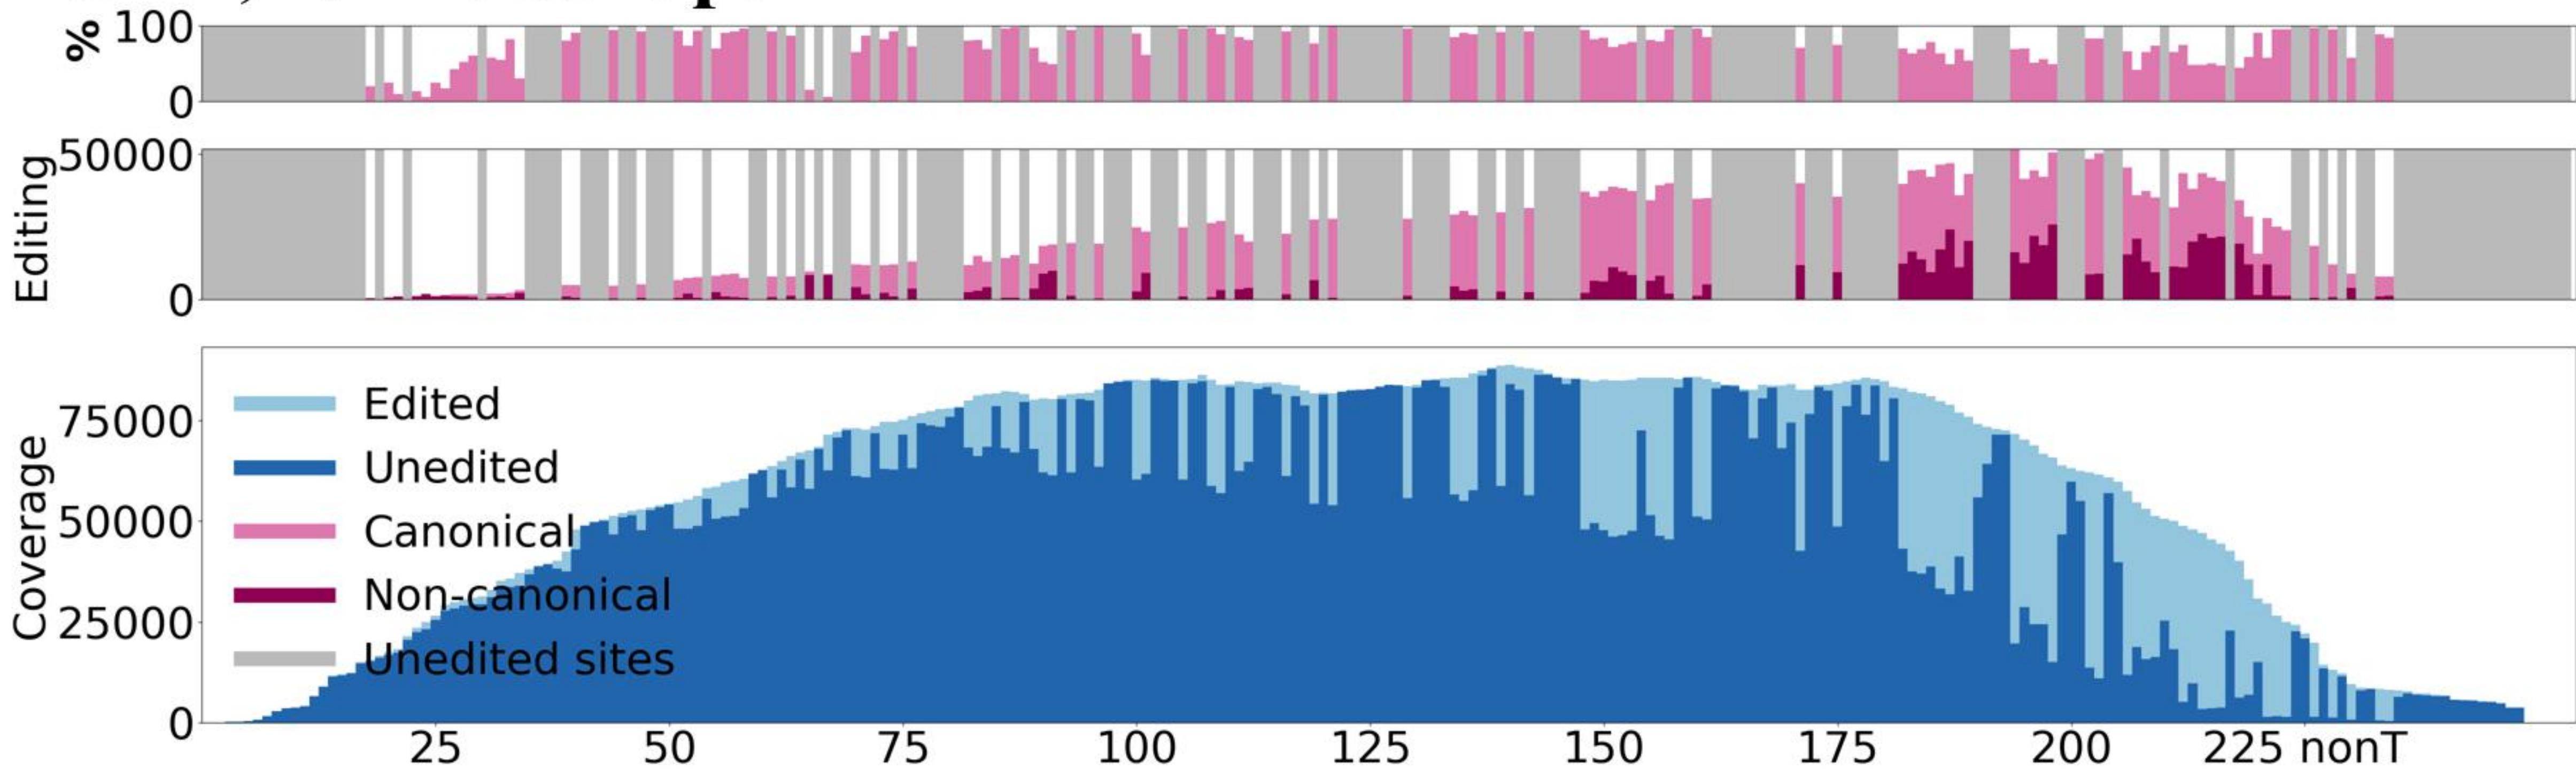

# SYL, ND8 : abrupt

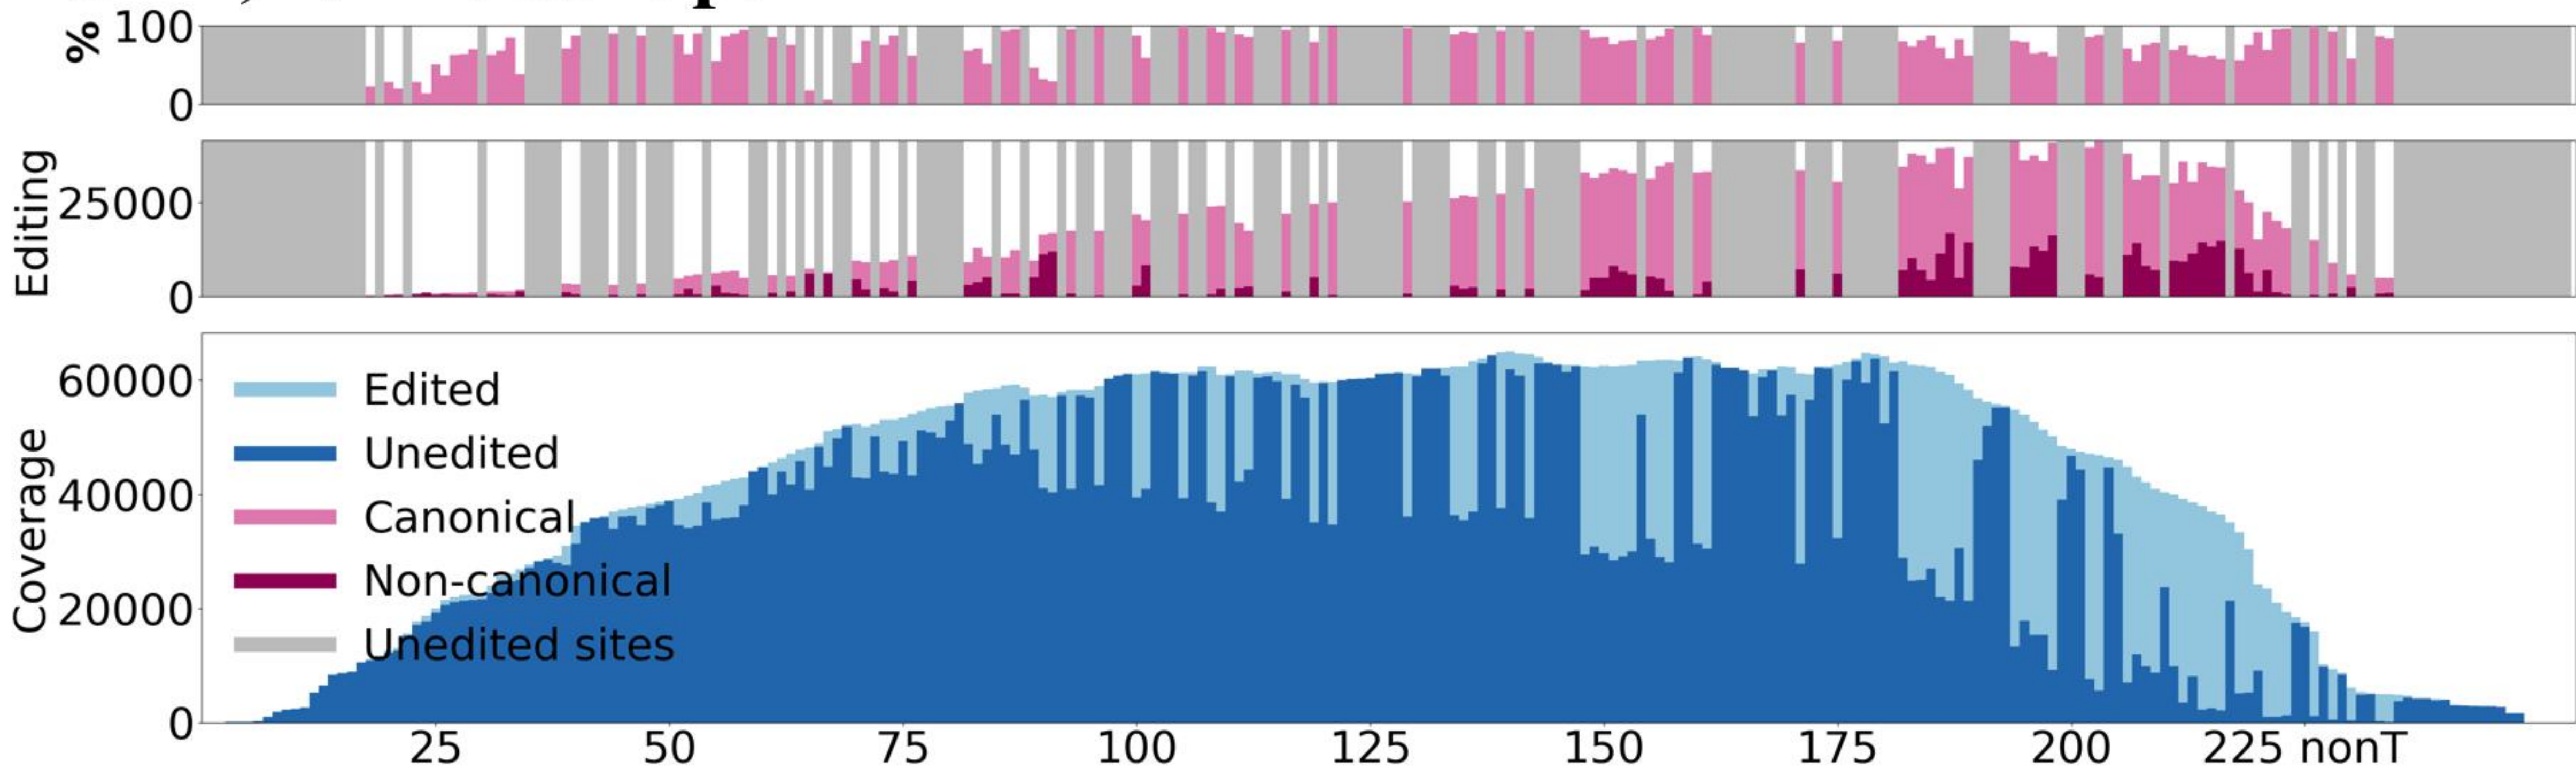

# SYL, ND8 : slow

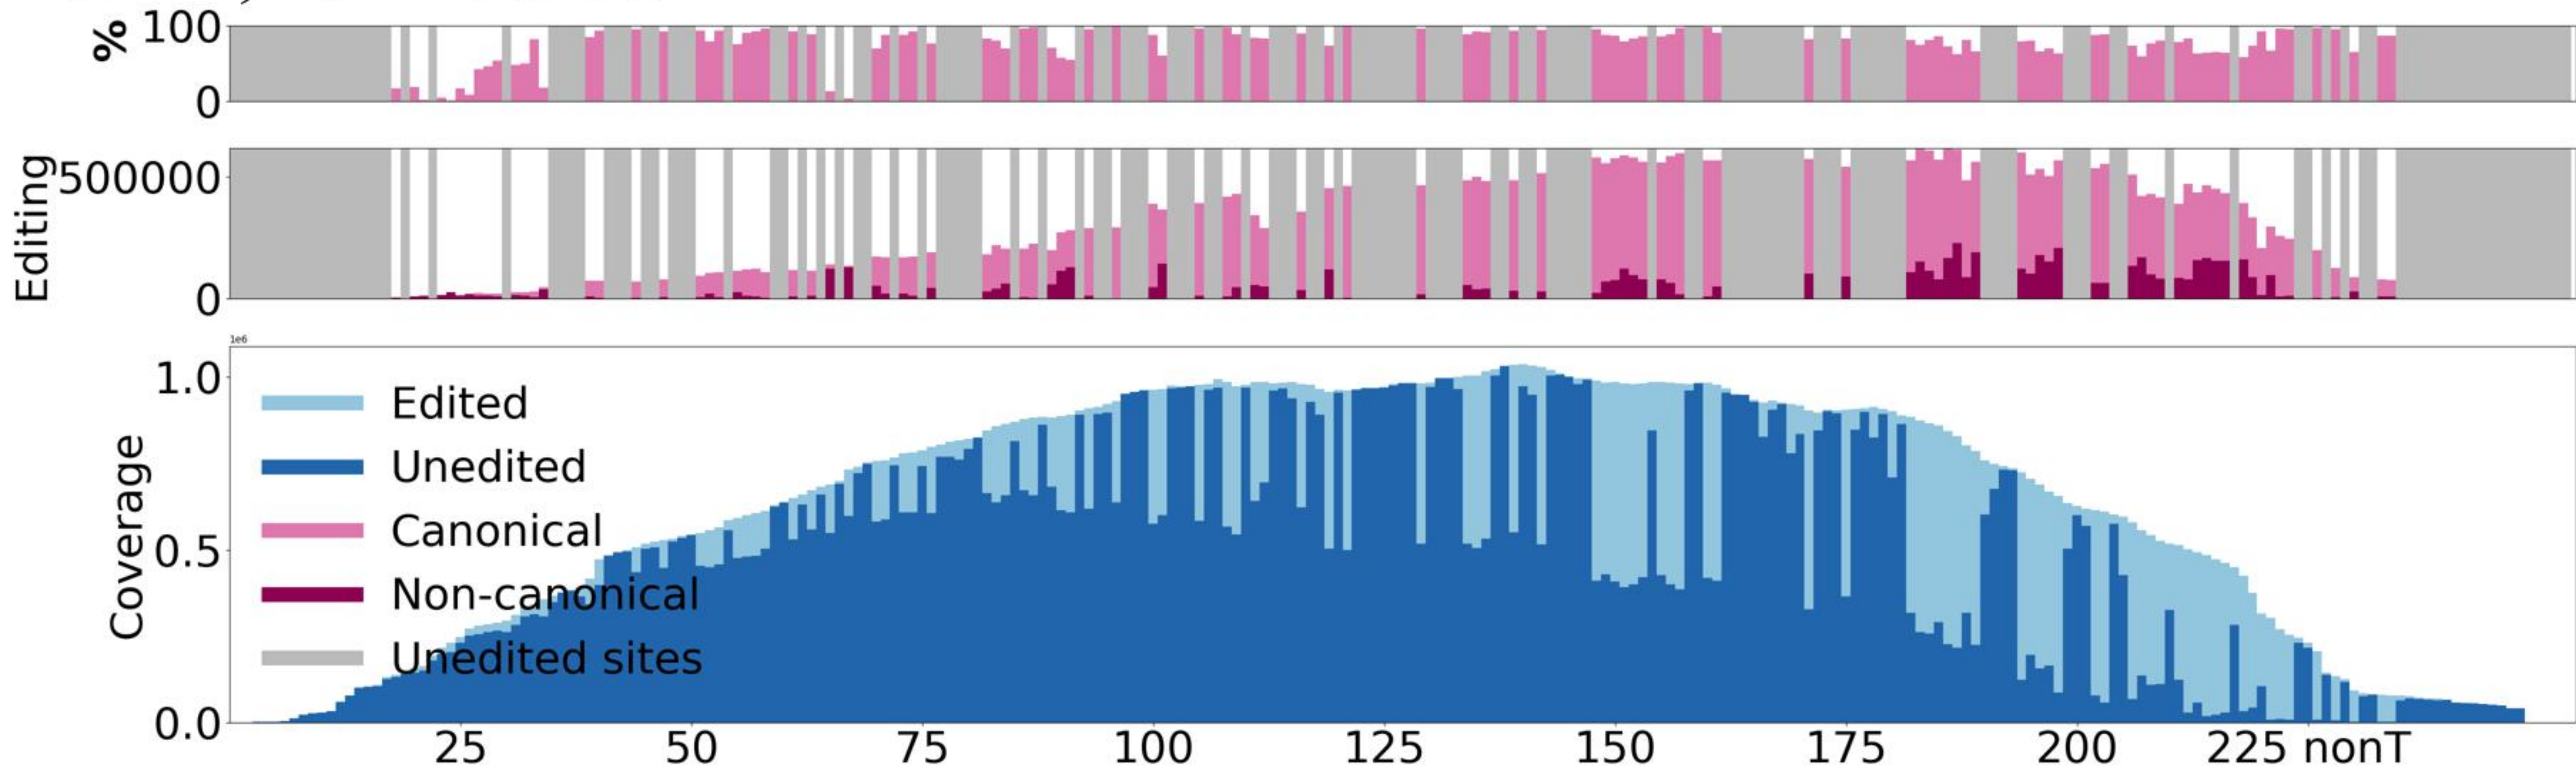

# SYL, ND8 : slow

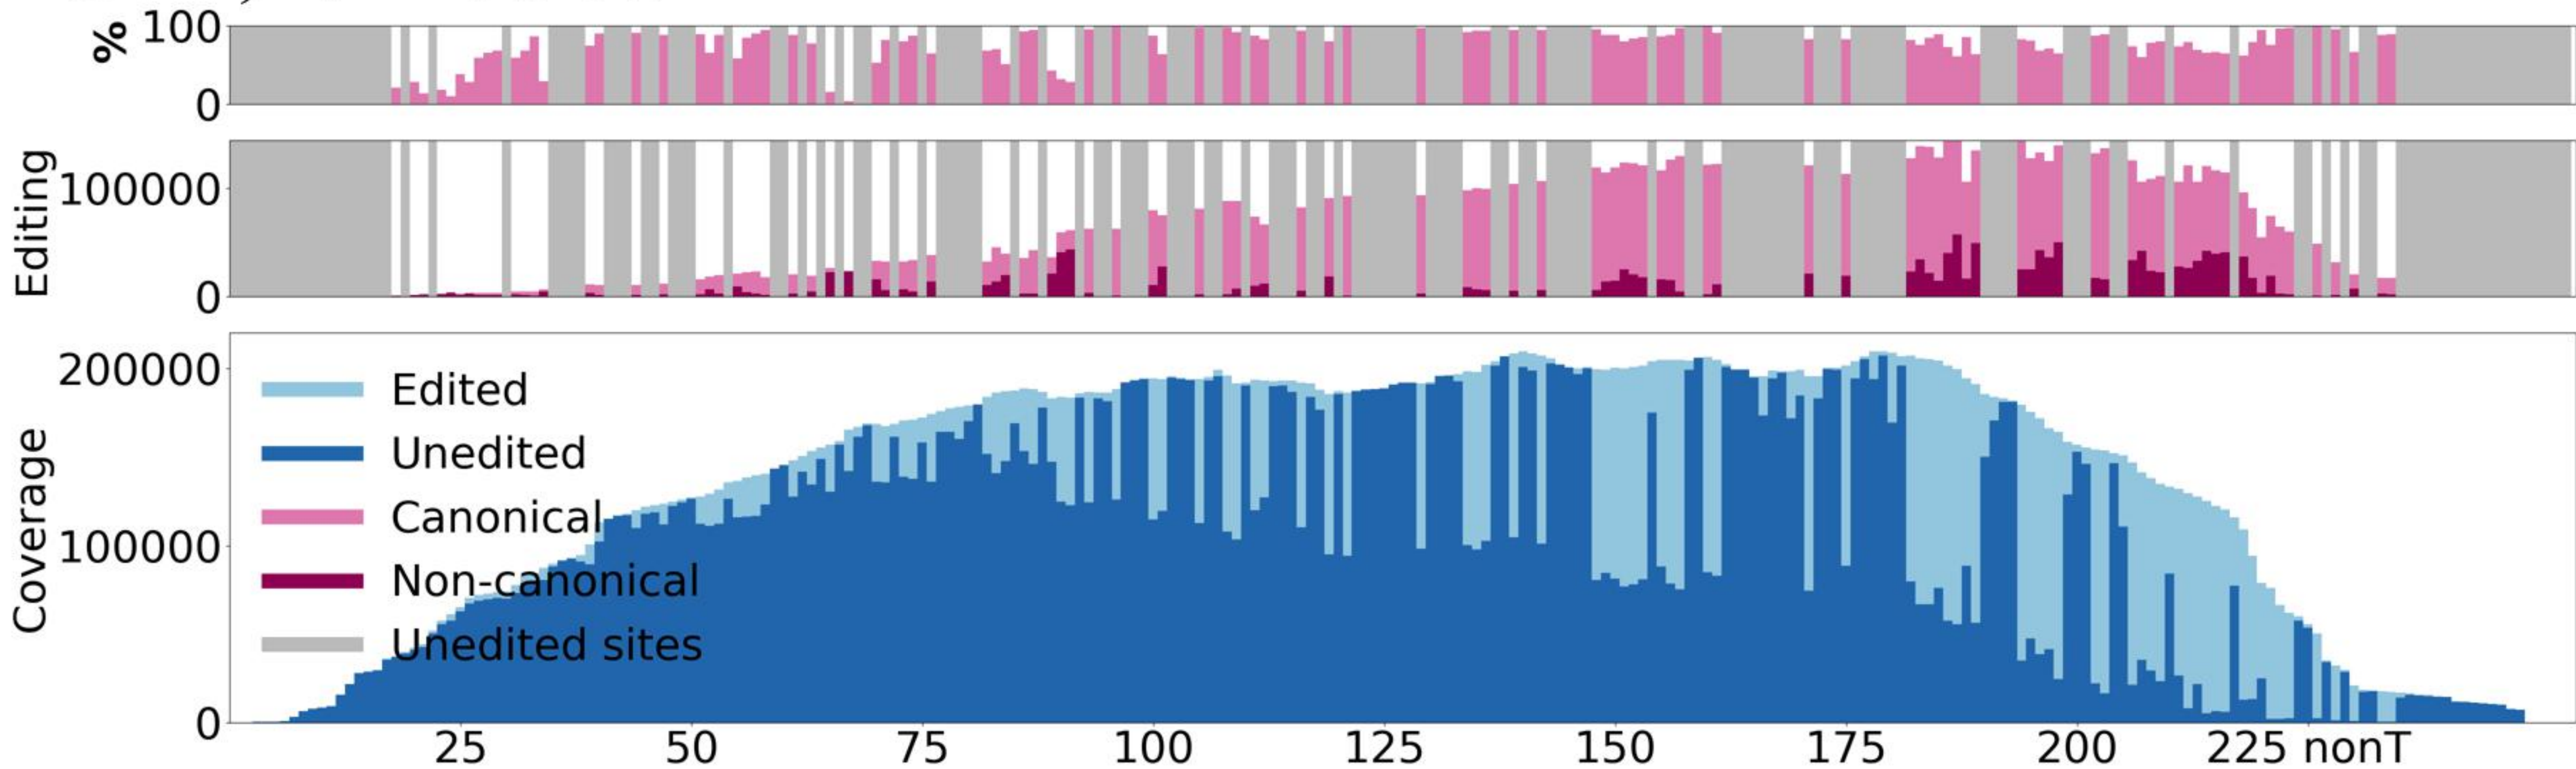

# SYL, ND8 : mito

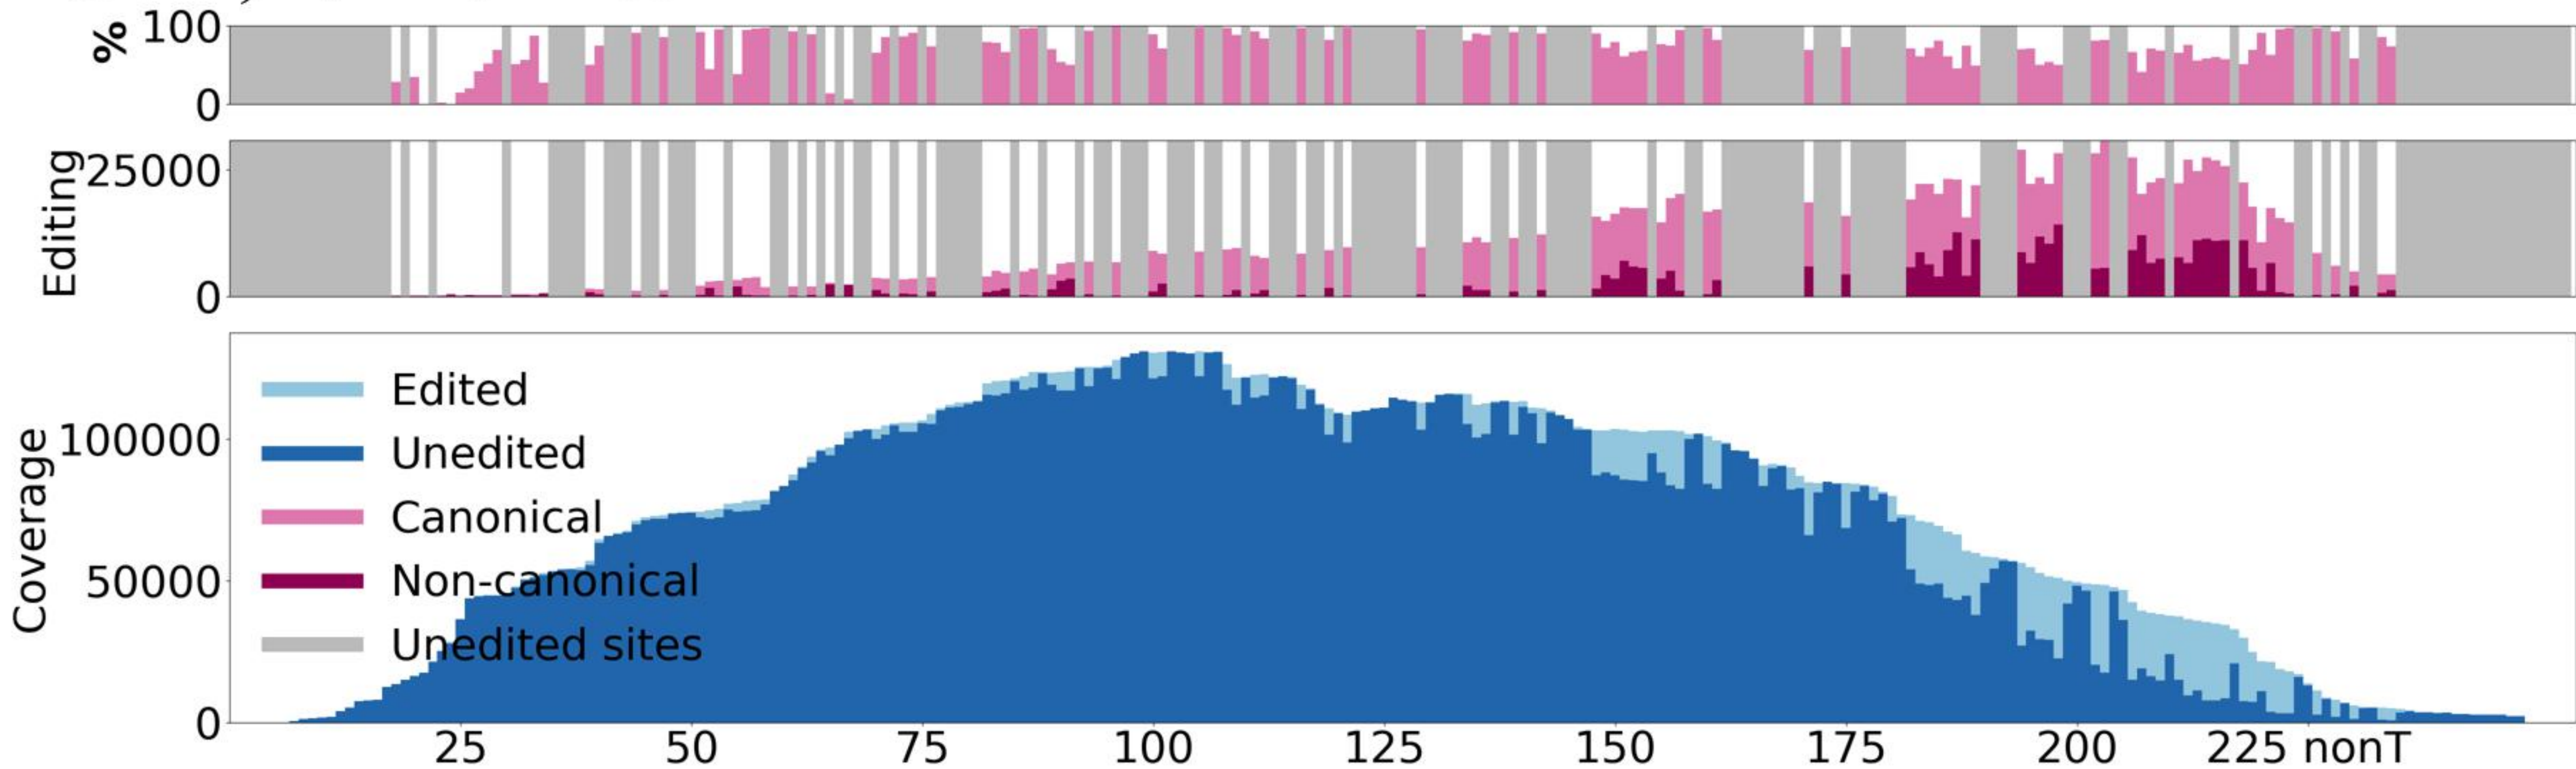

# SYL, ND8 : mito

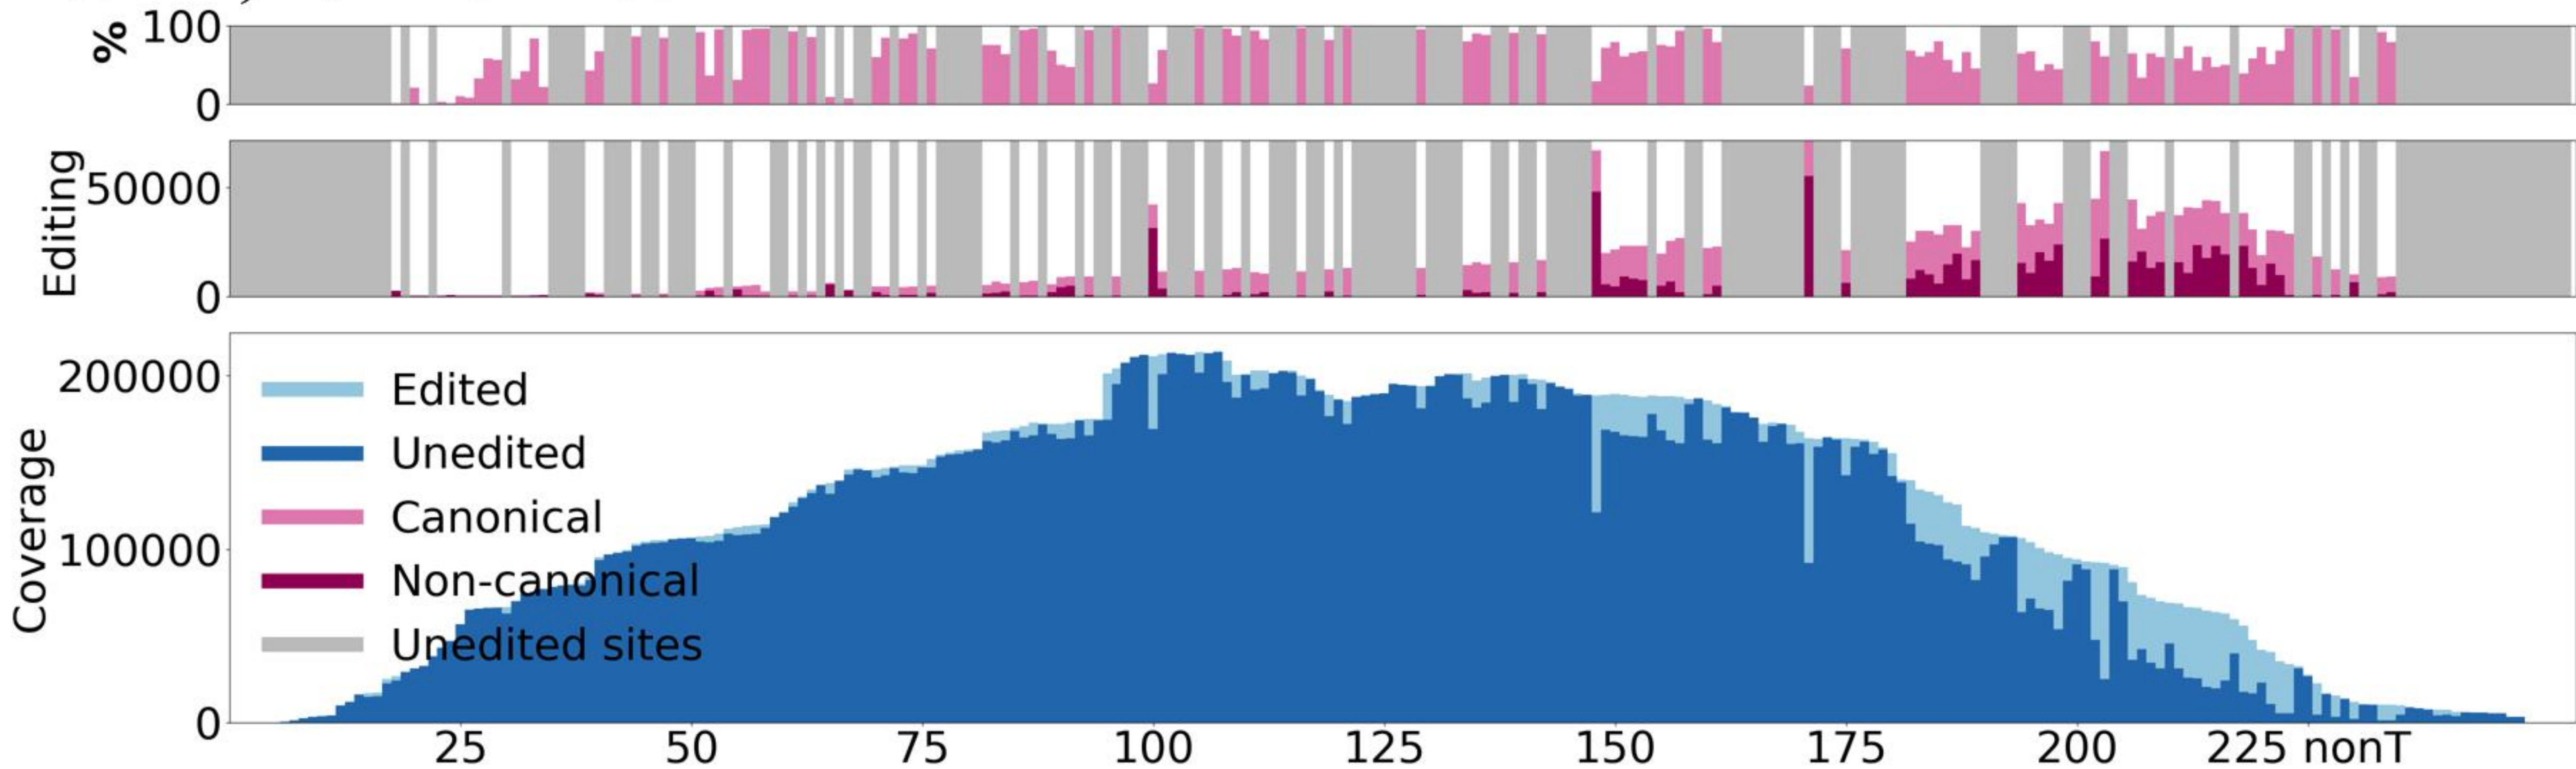

# SYL, ND8 : total

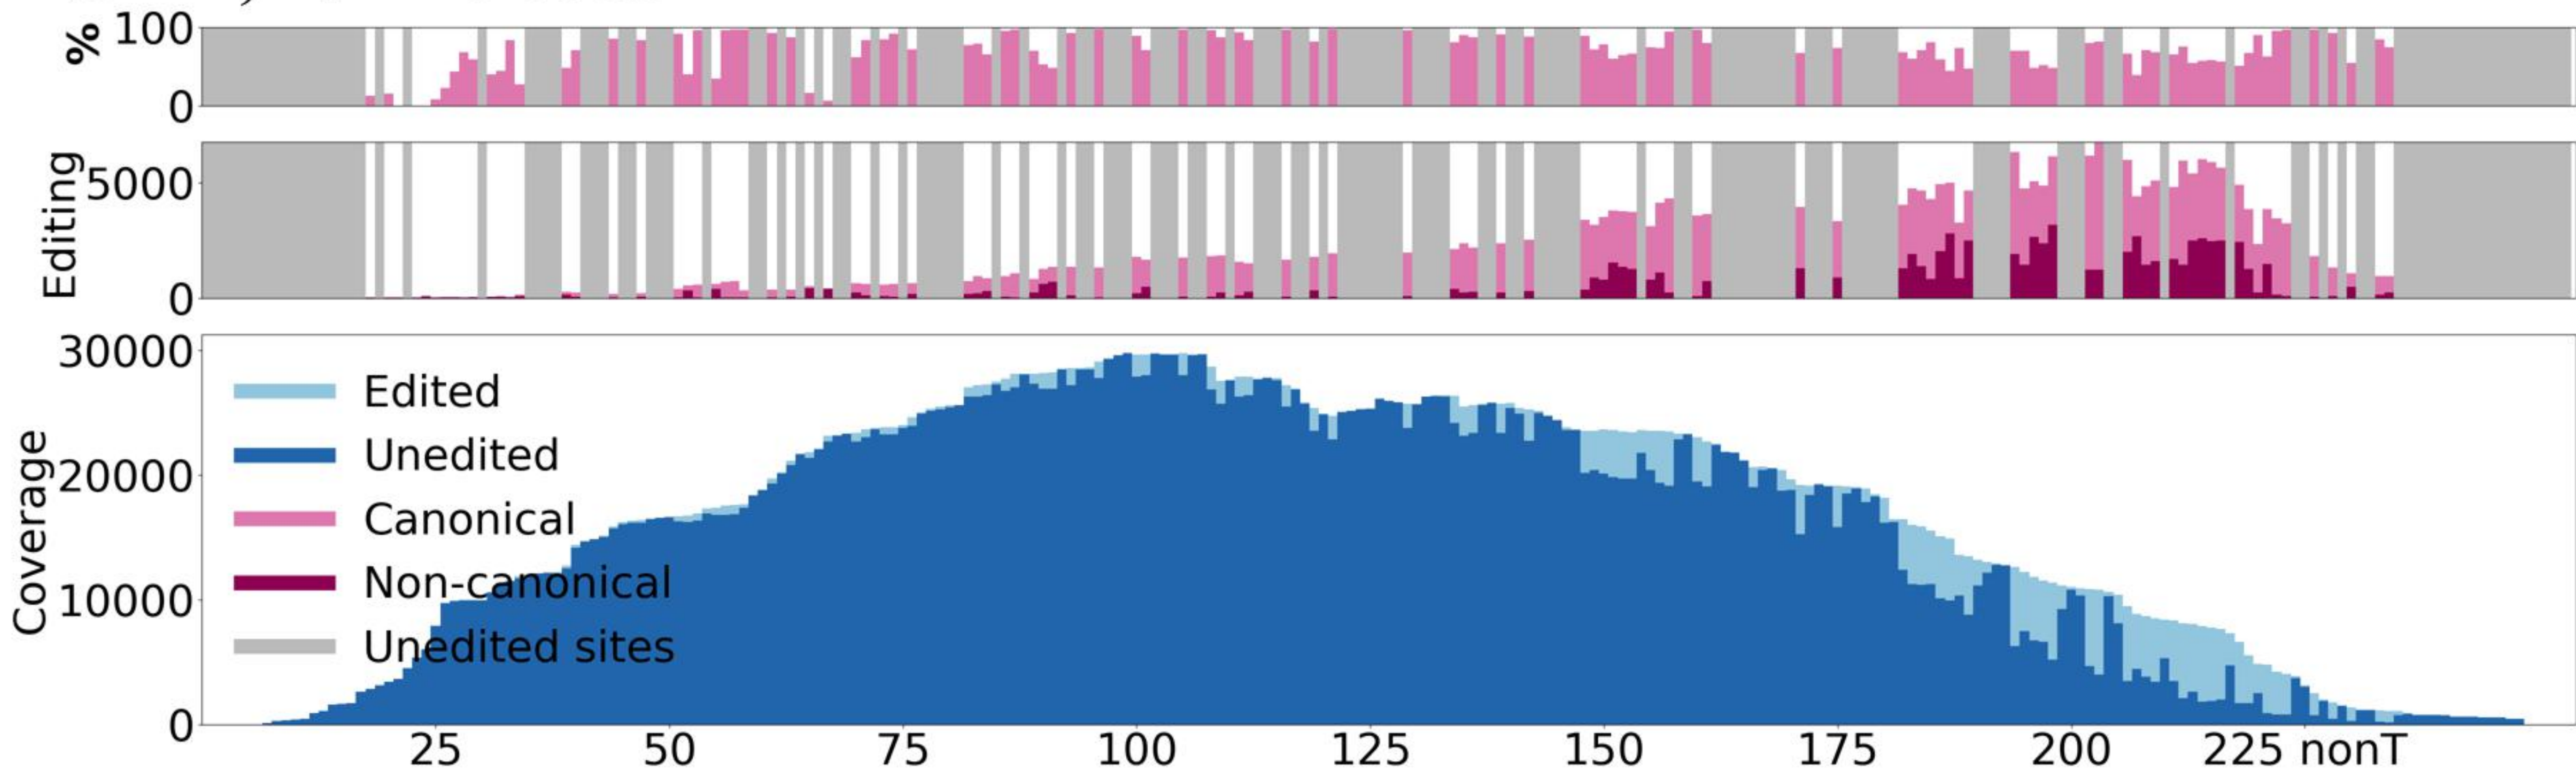

# SYL, ND8 : total

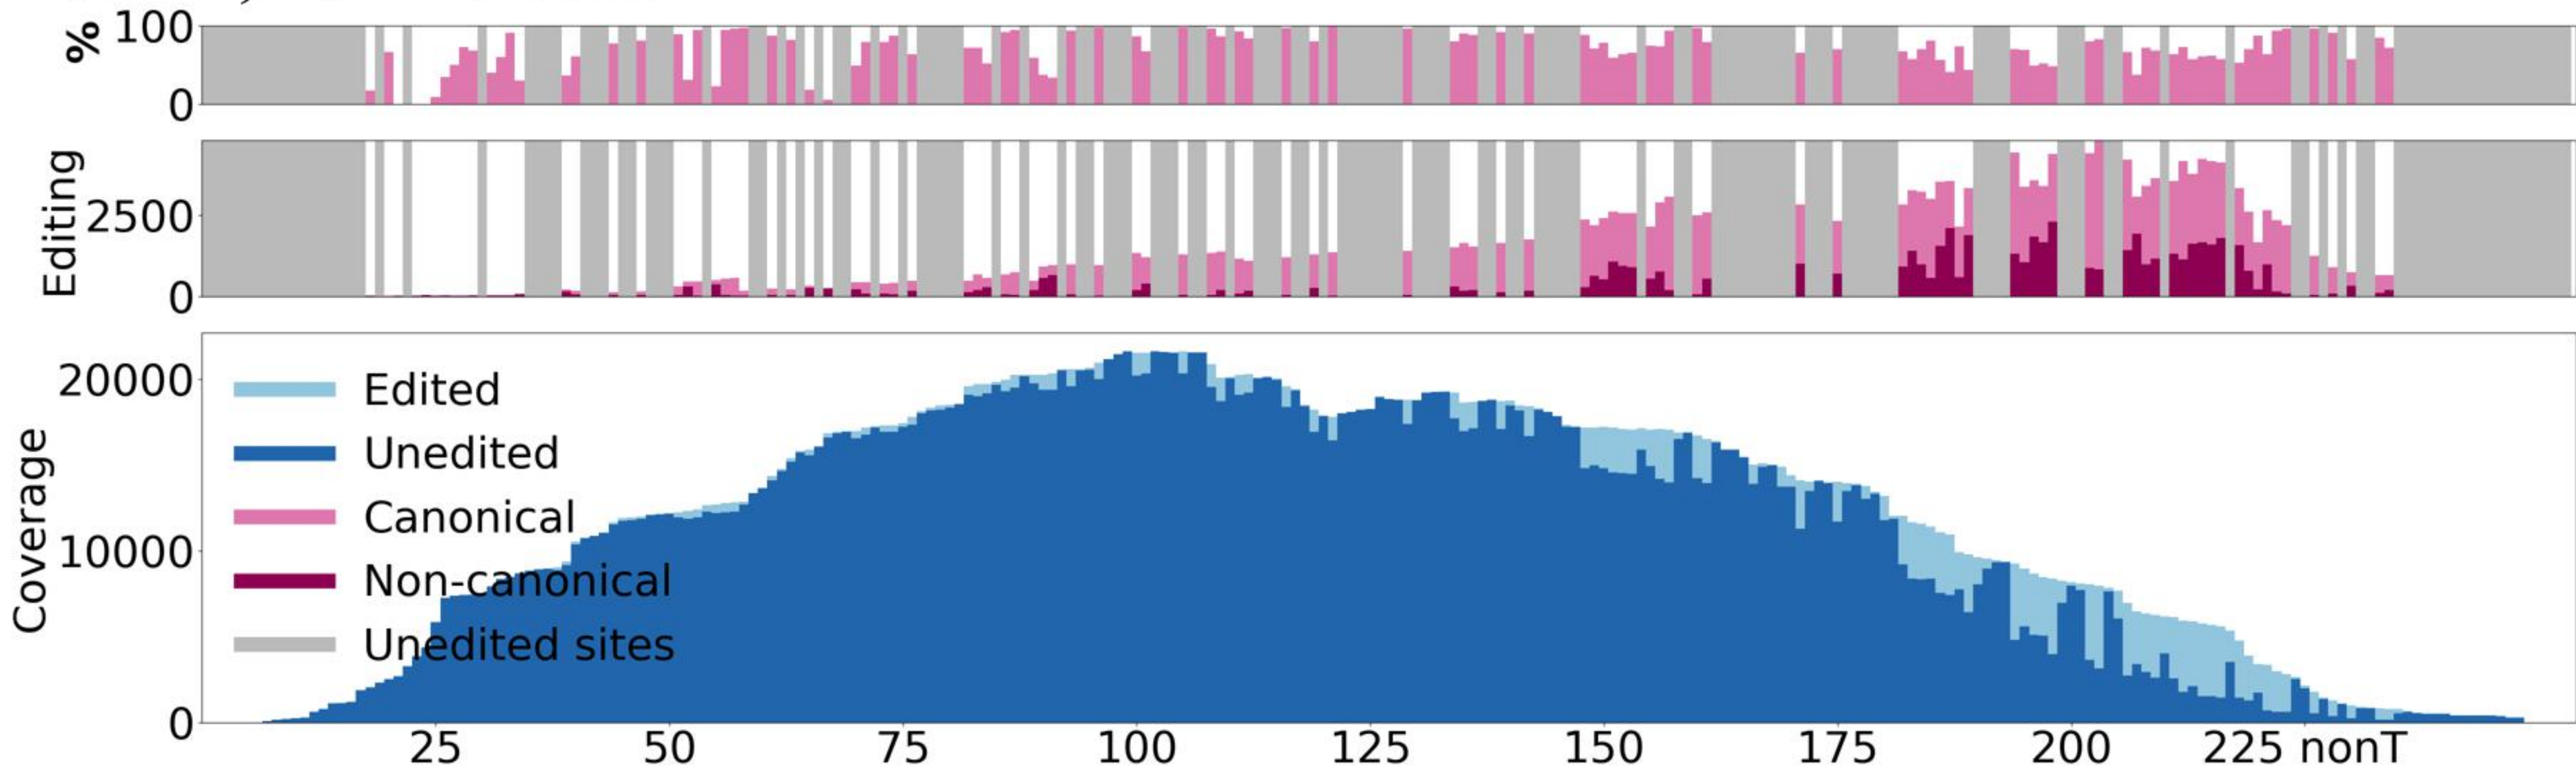

# SYL, ND9 : fed

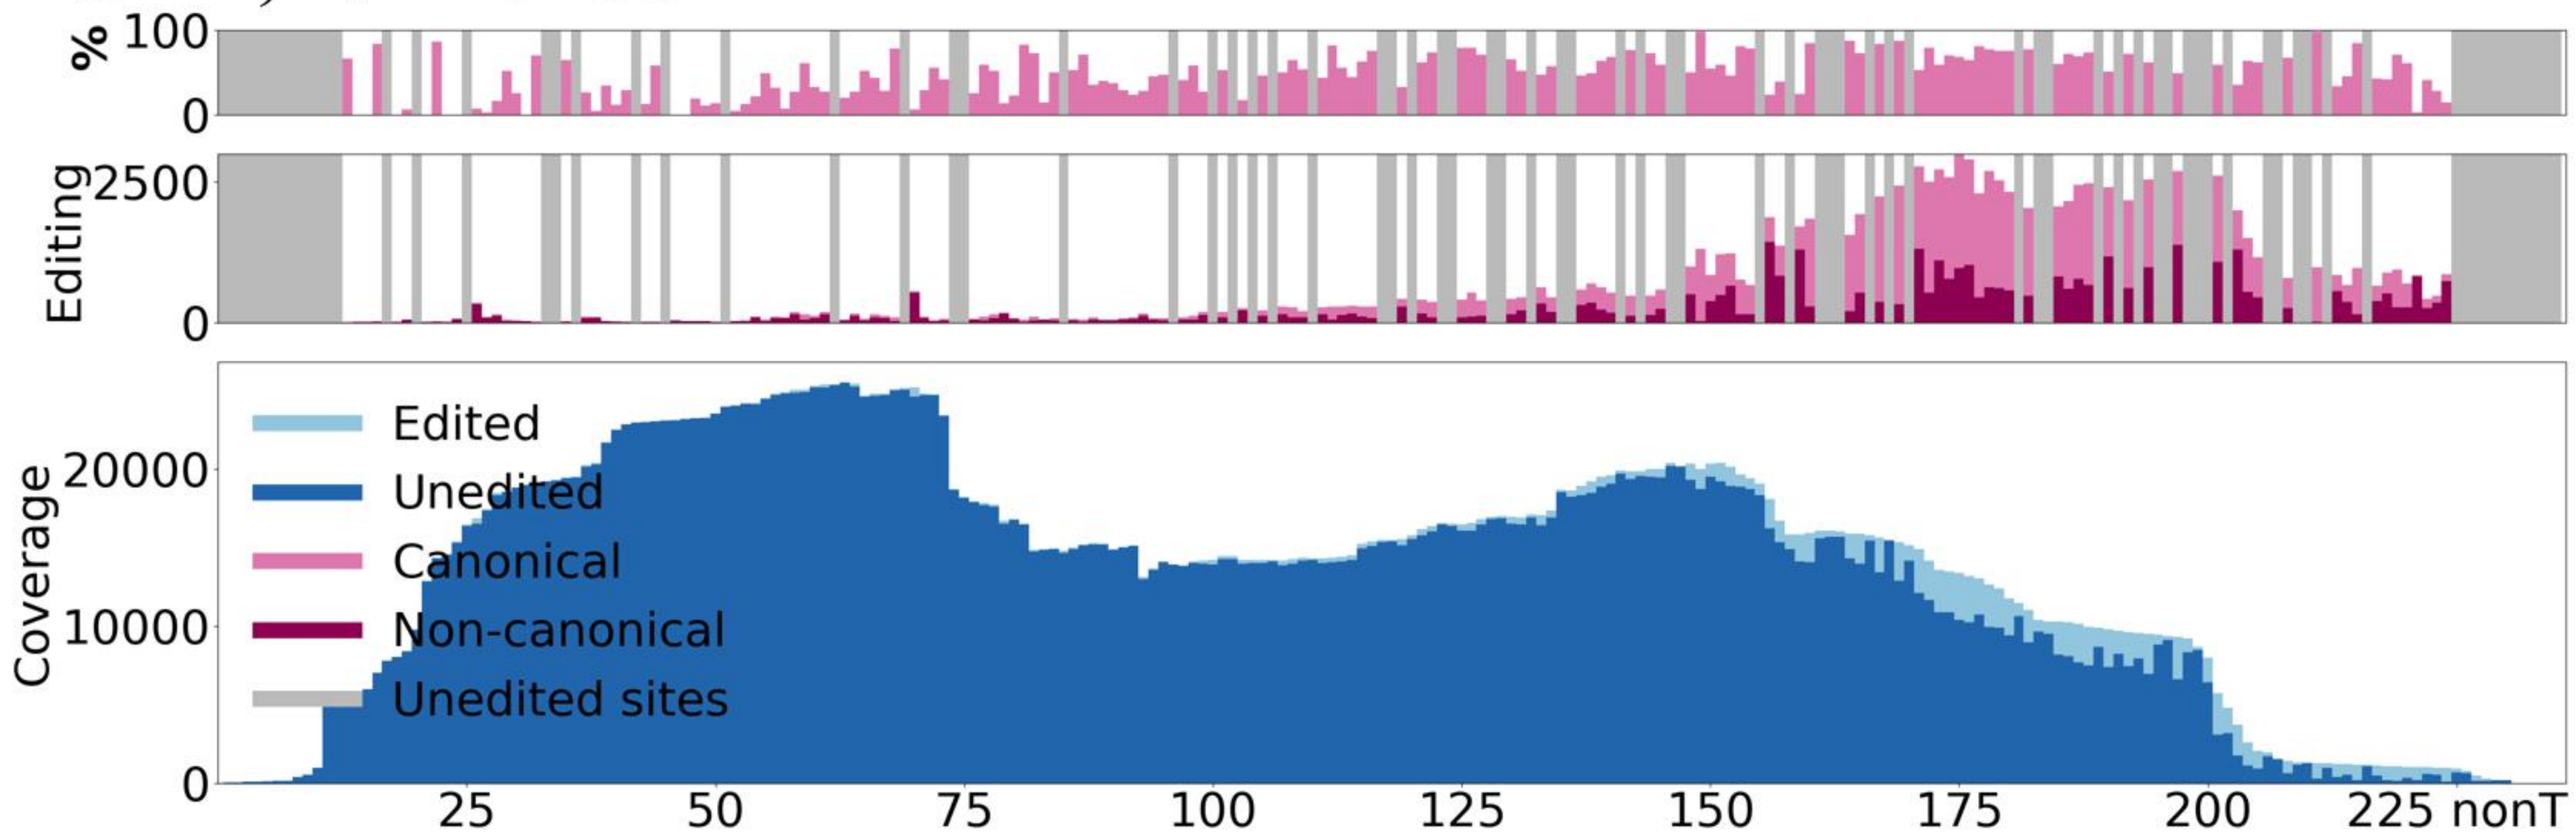

# SYL, ND9 : fed

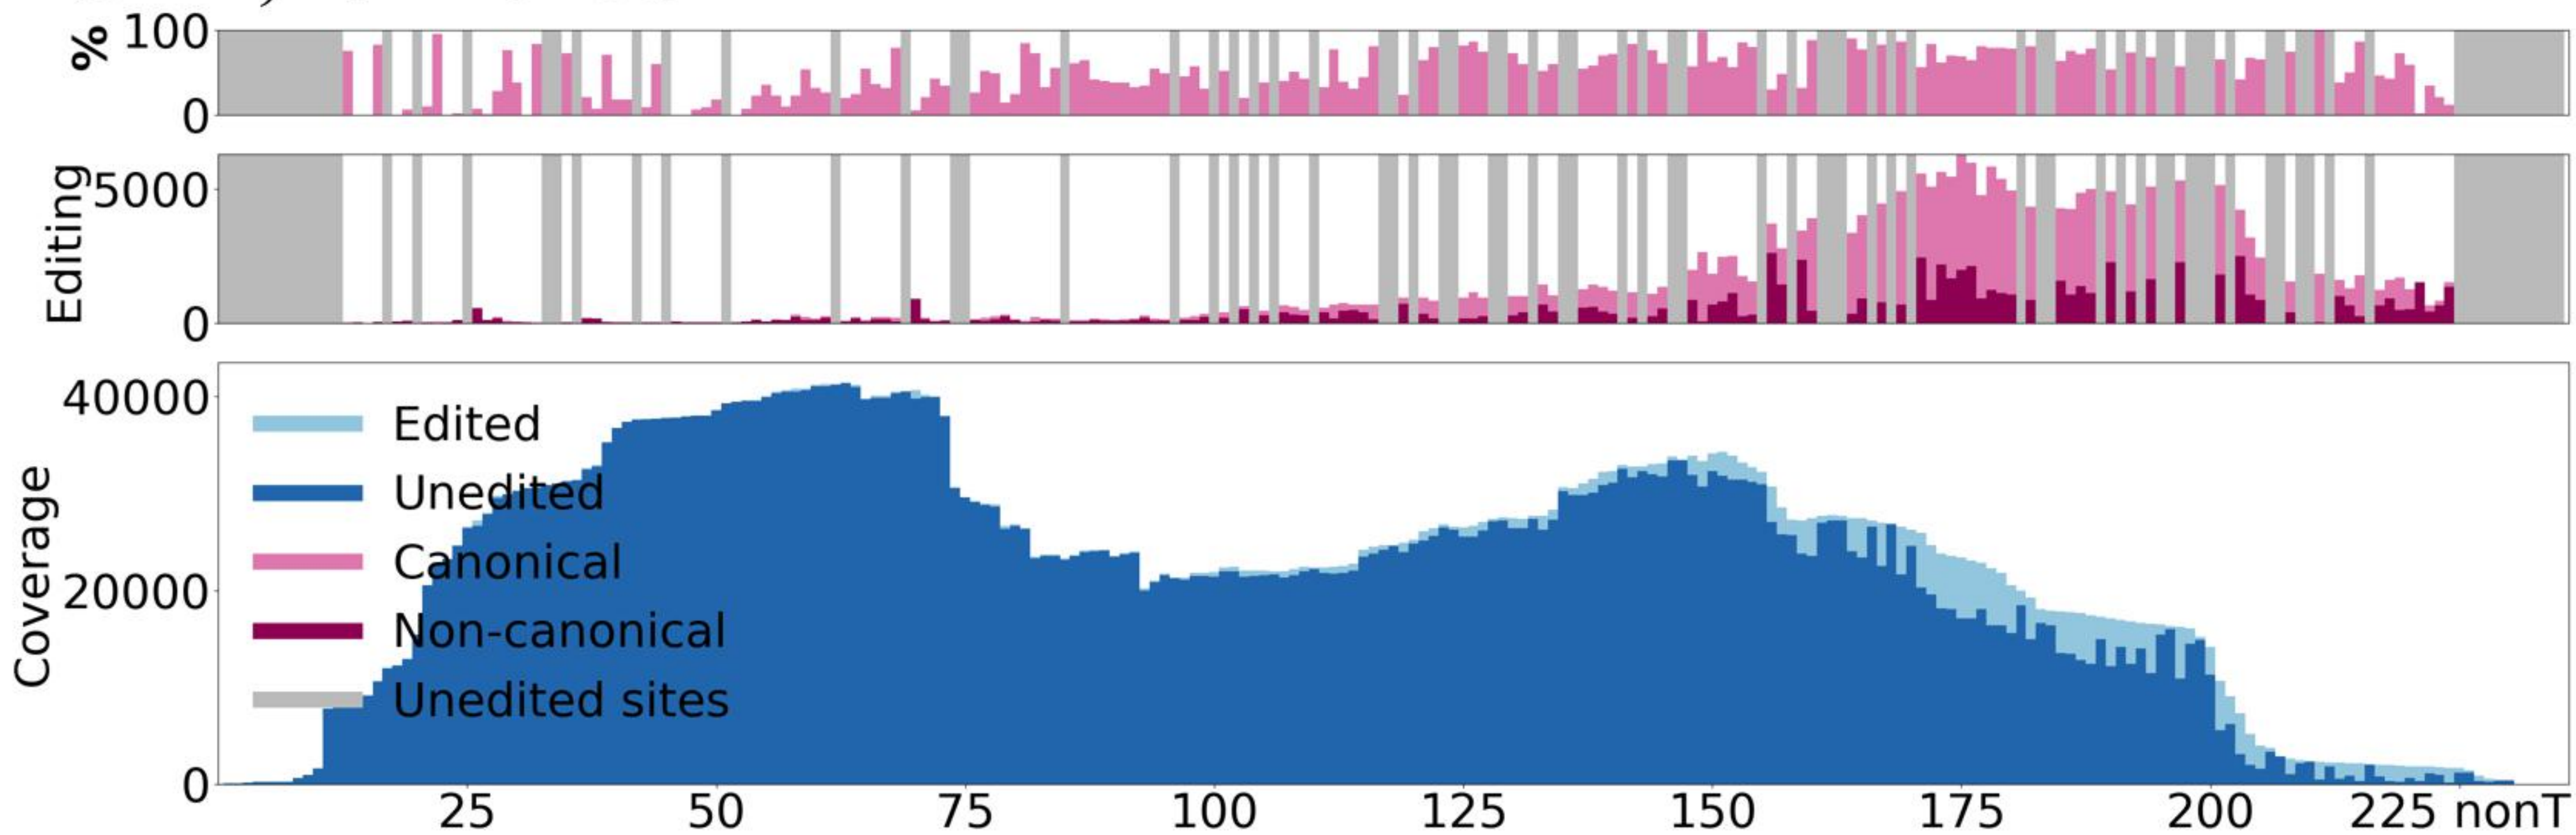

# SYL, ND9 : abrupt

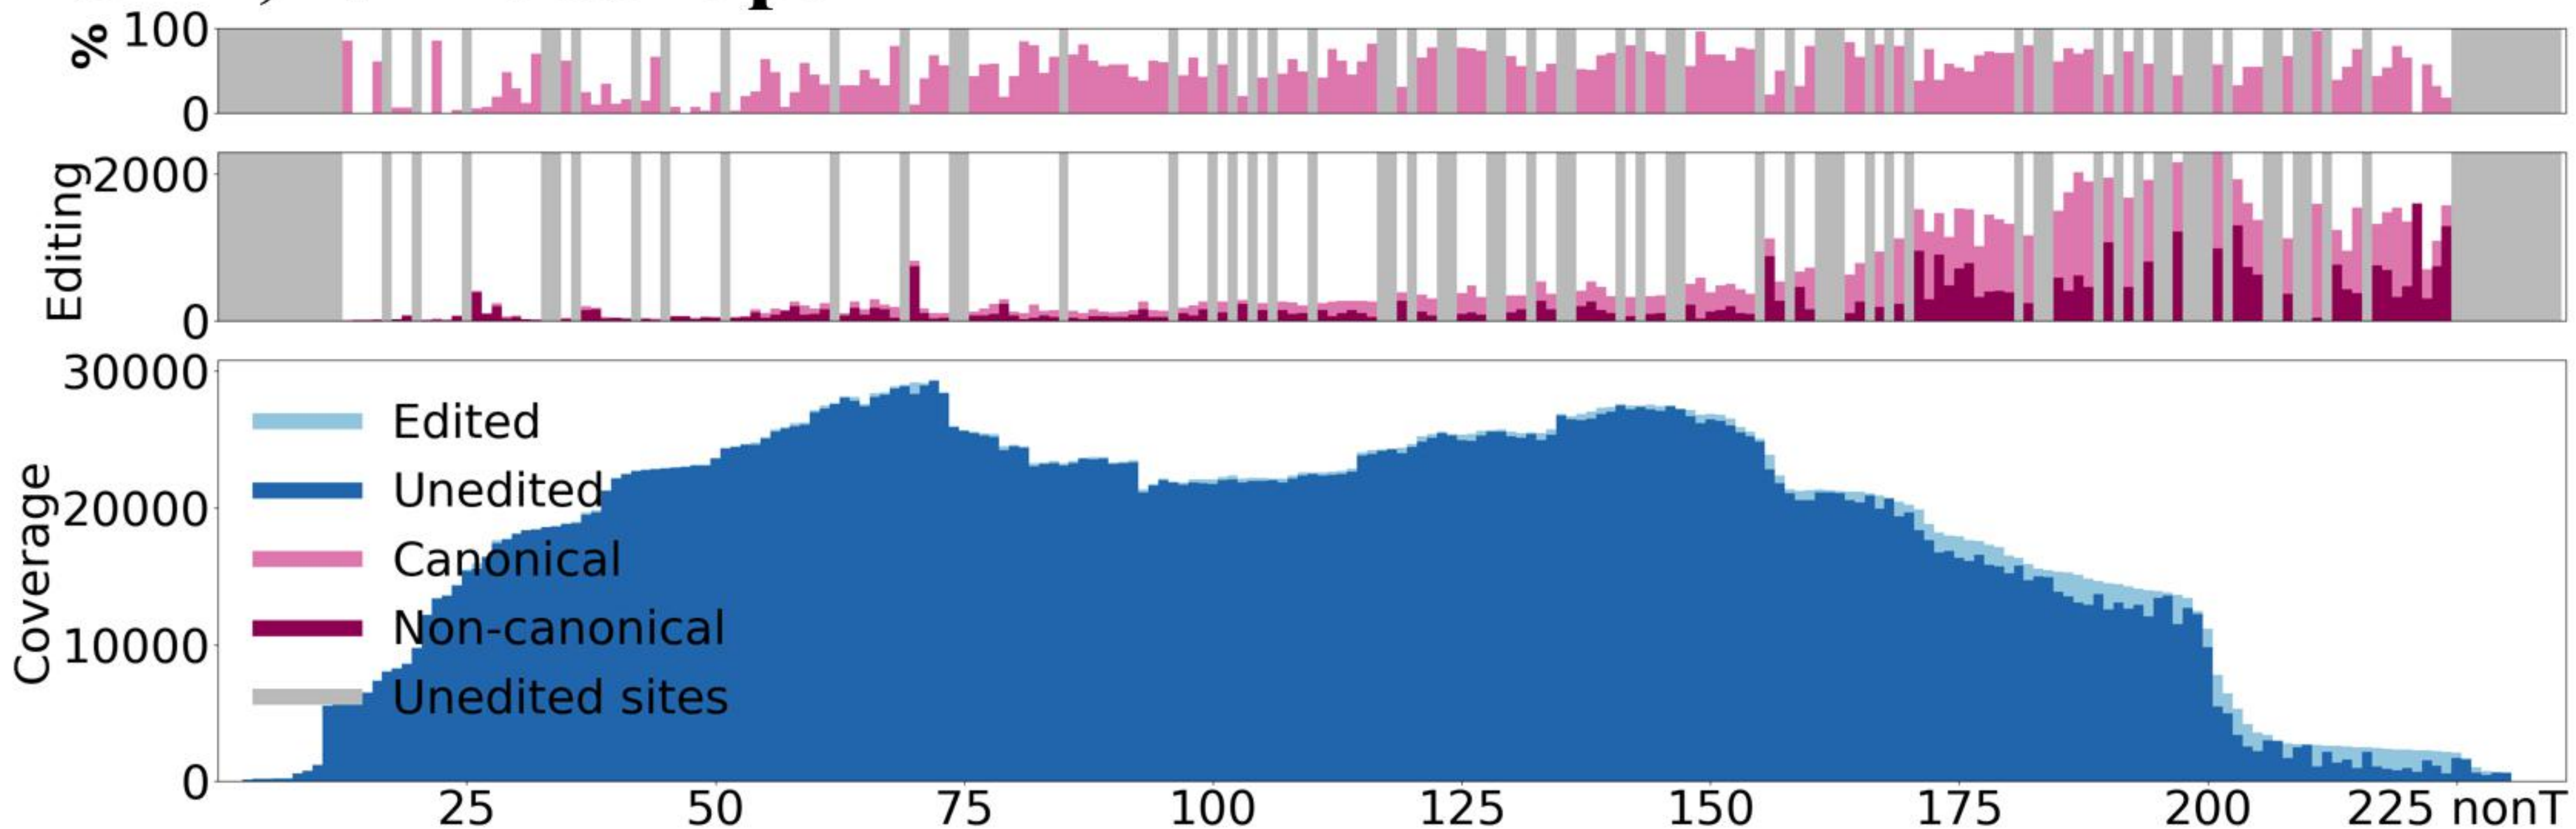

# SYL, ND9 : abrupt

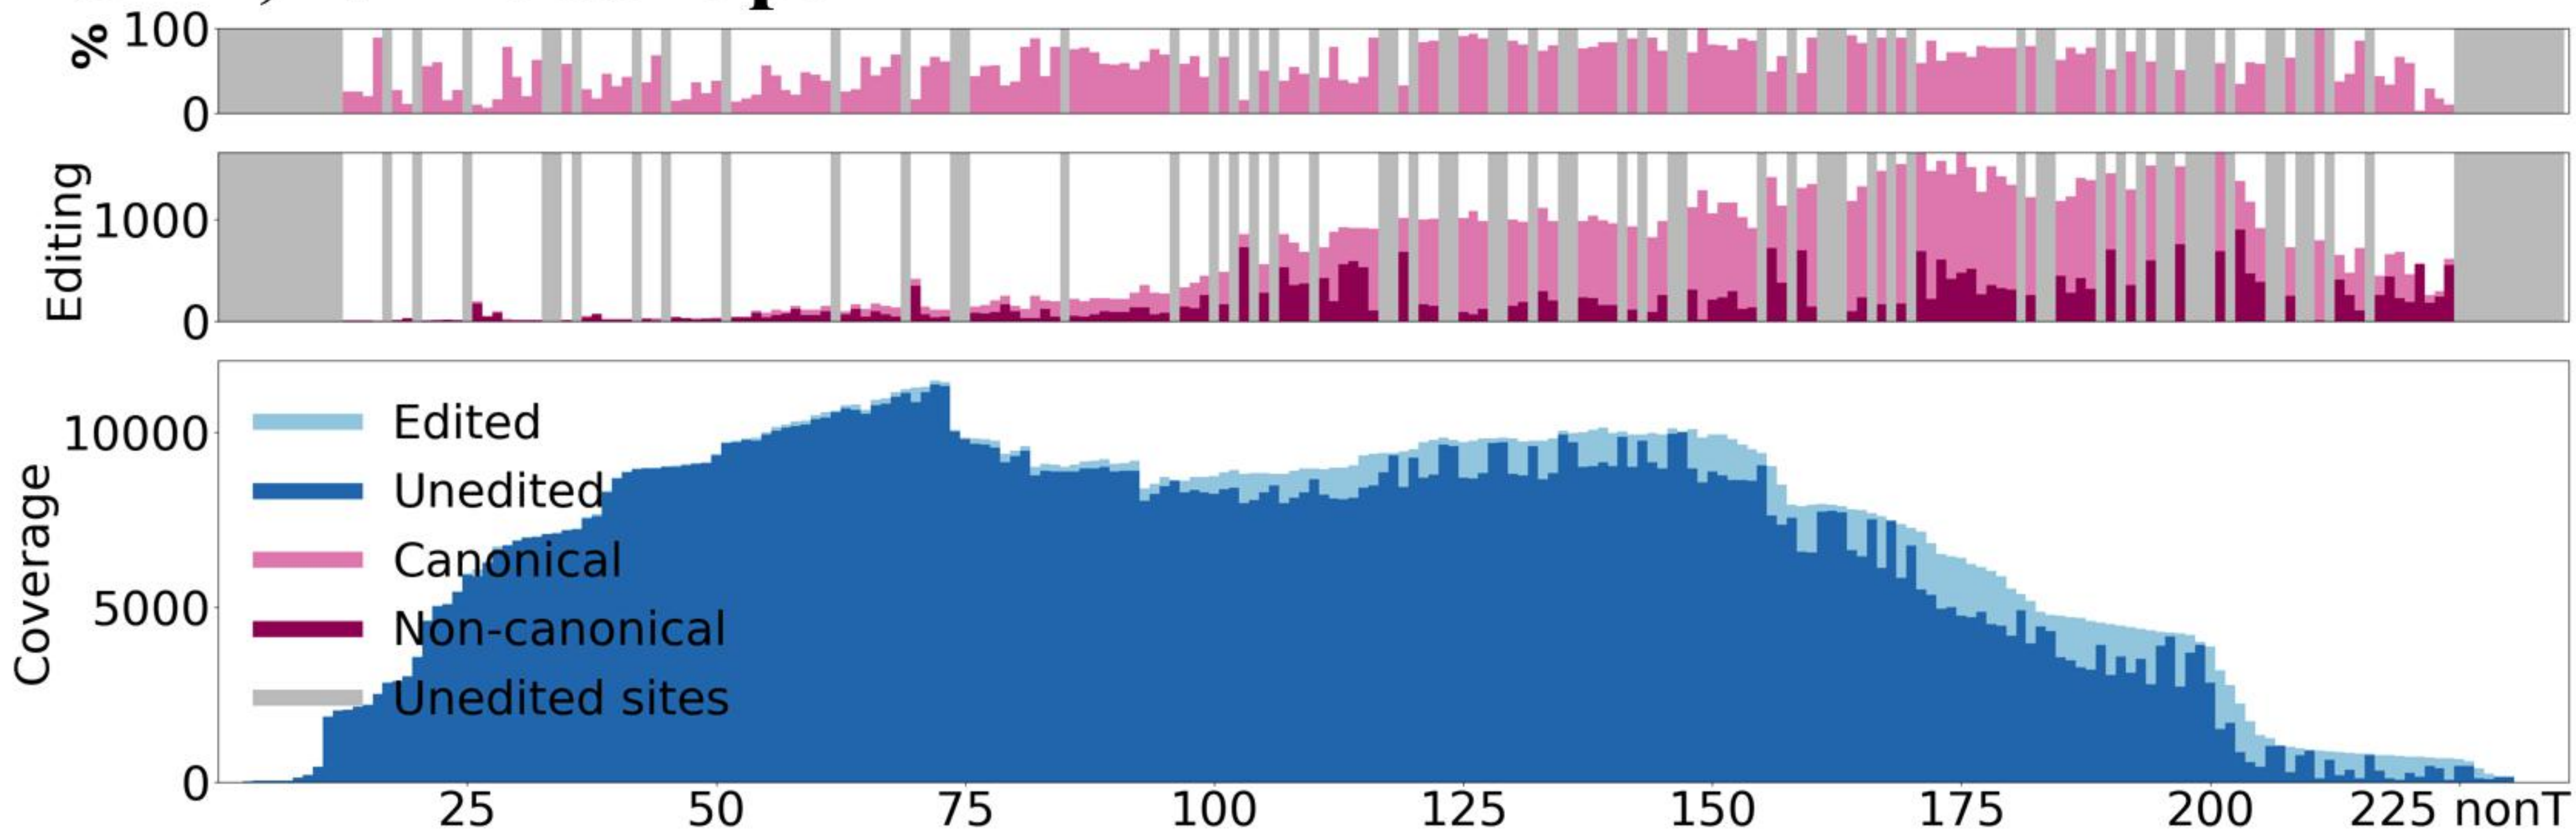

# SYL, ND9 : slow

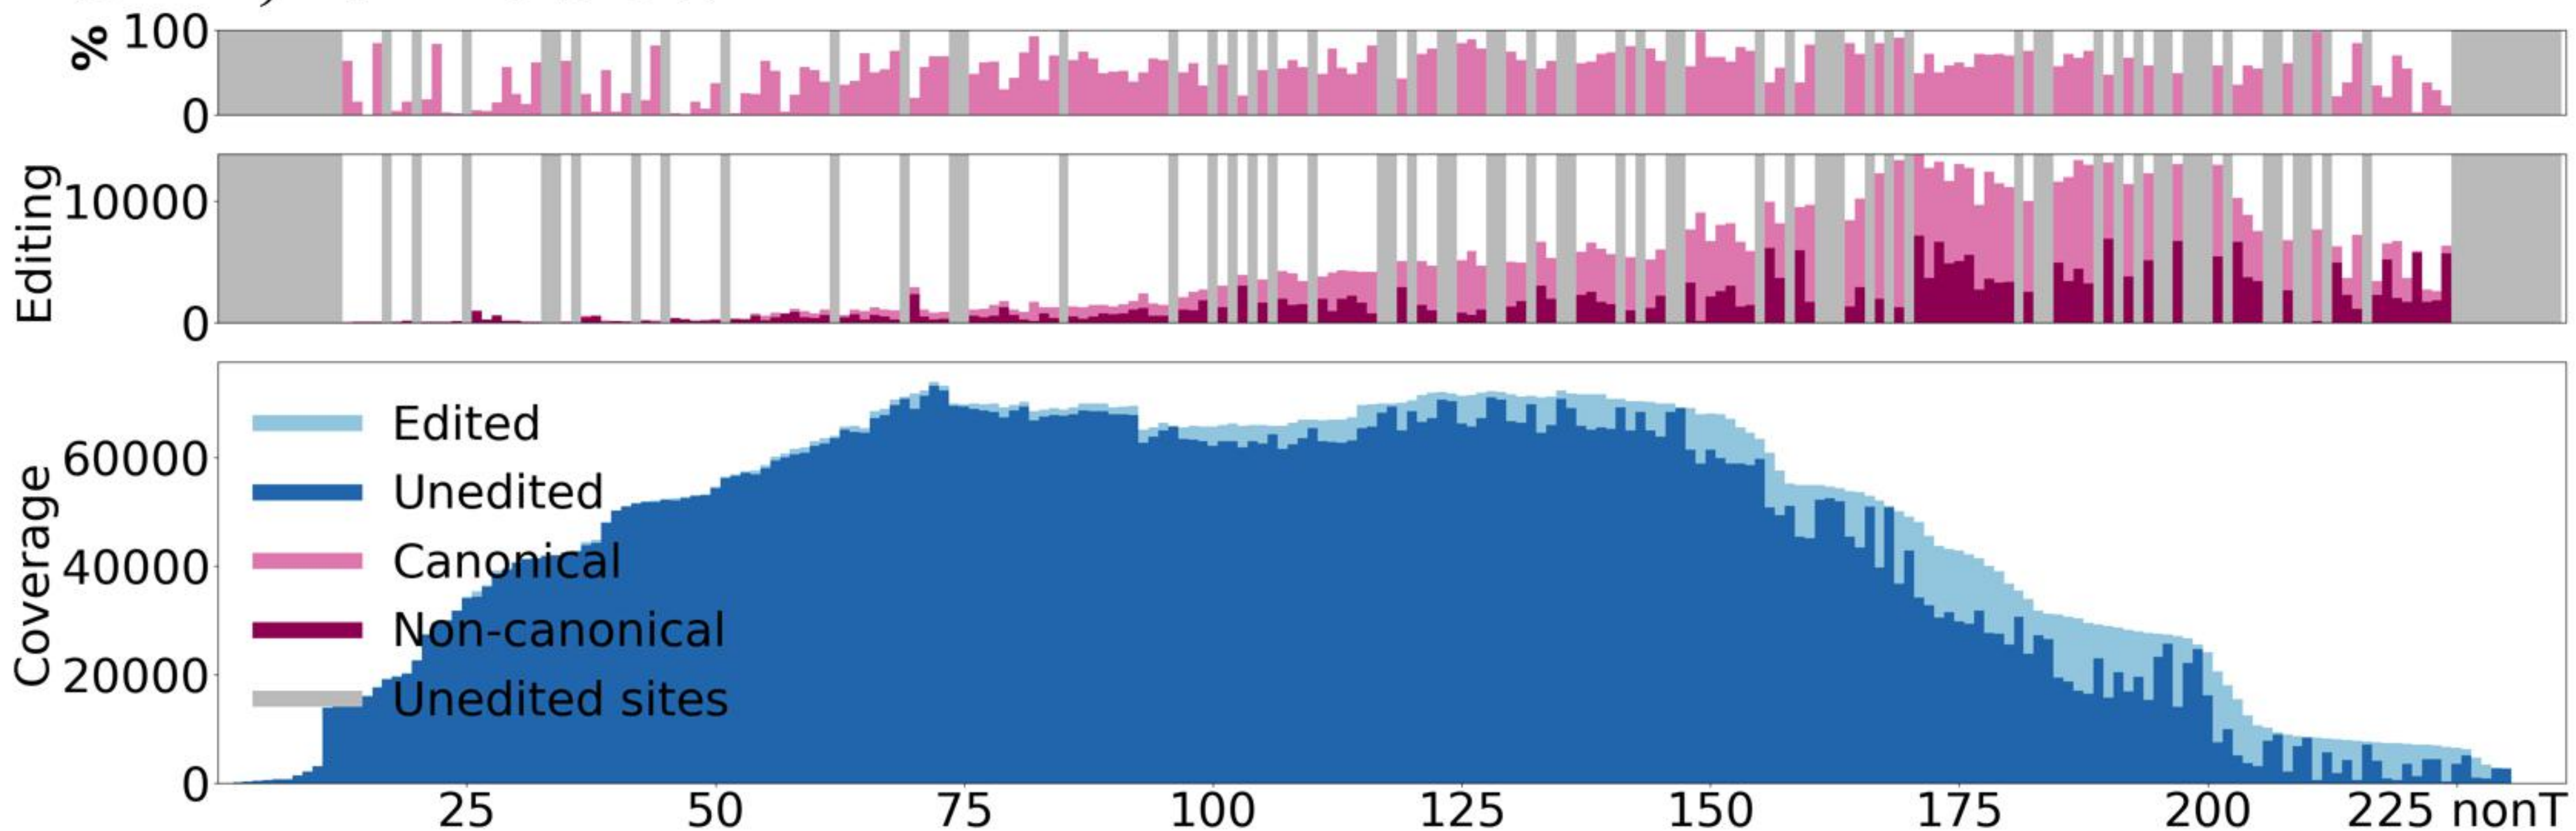

# SYL, ND9 : slow

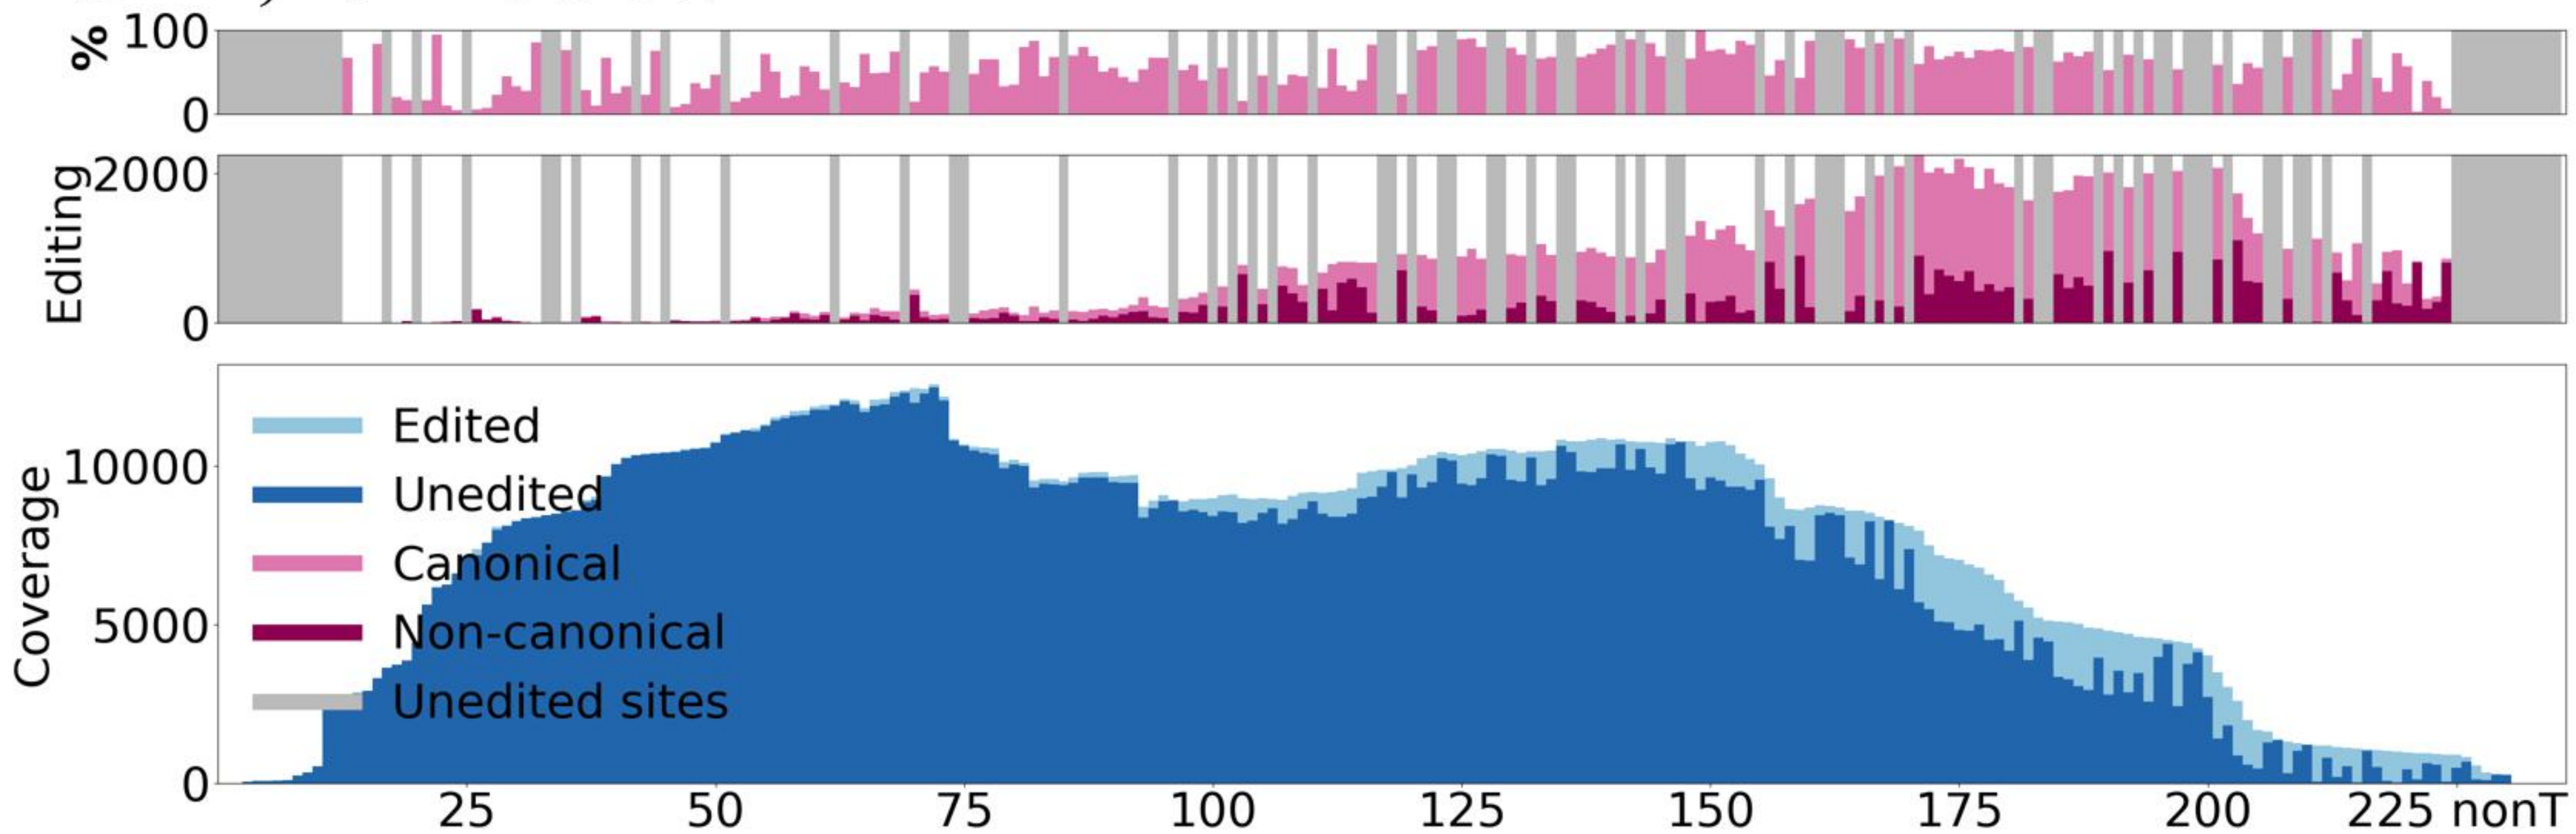

# SYL, ND9 : mito

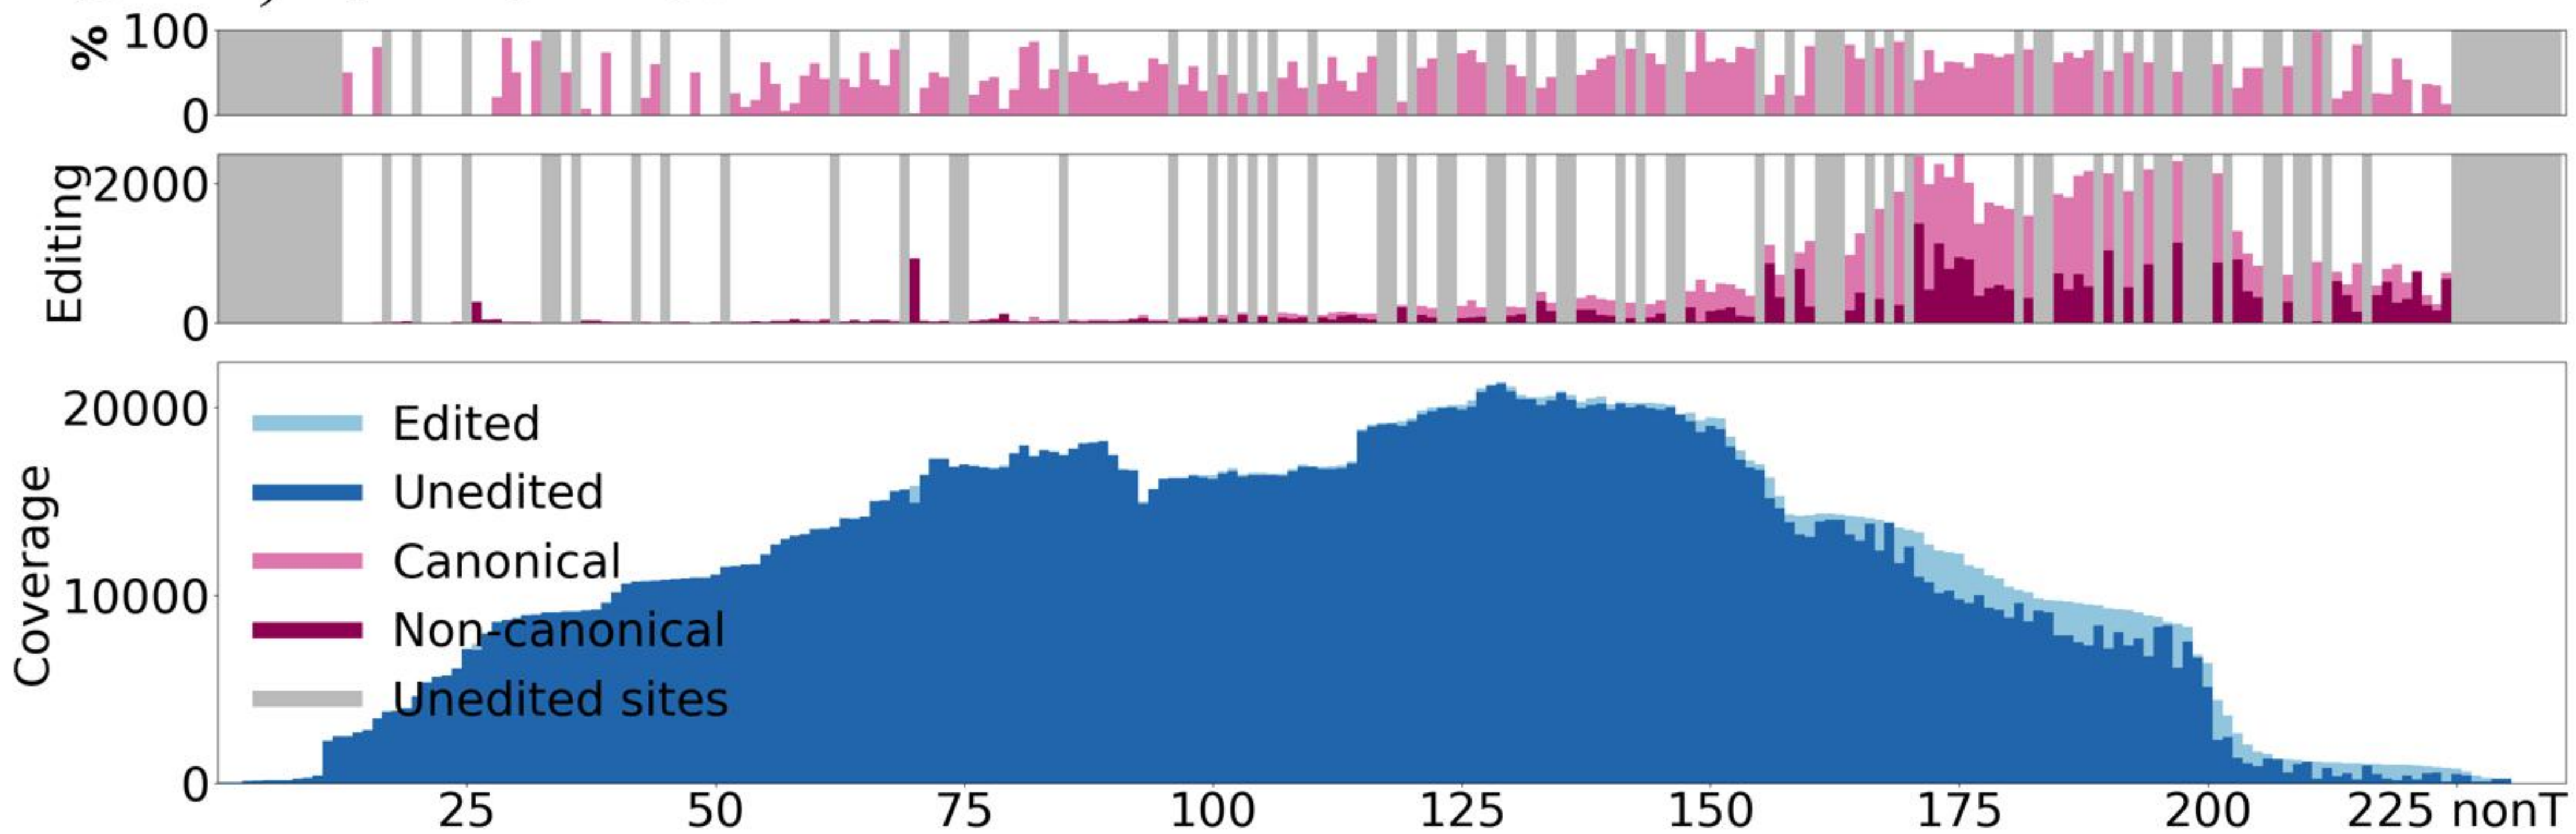

# SYL, ND9 : mito

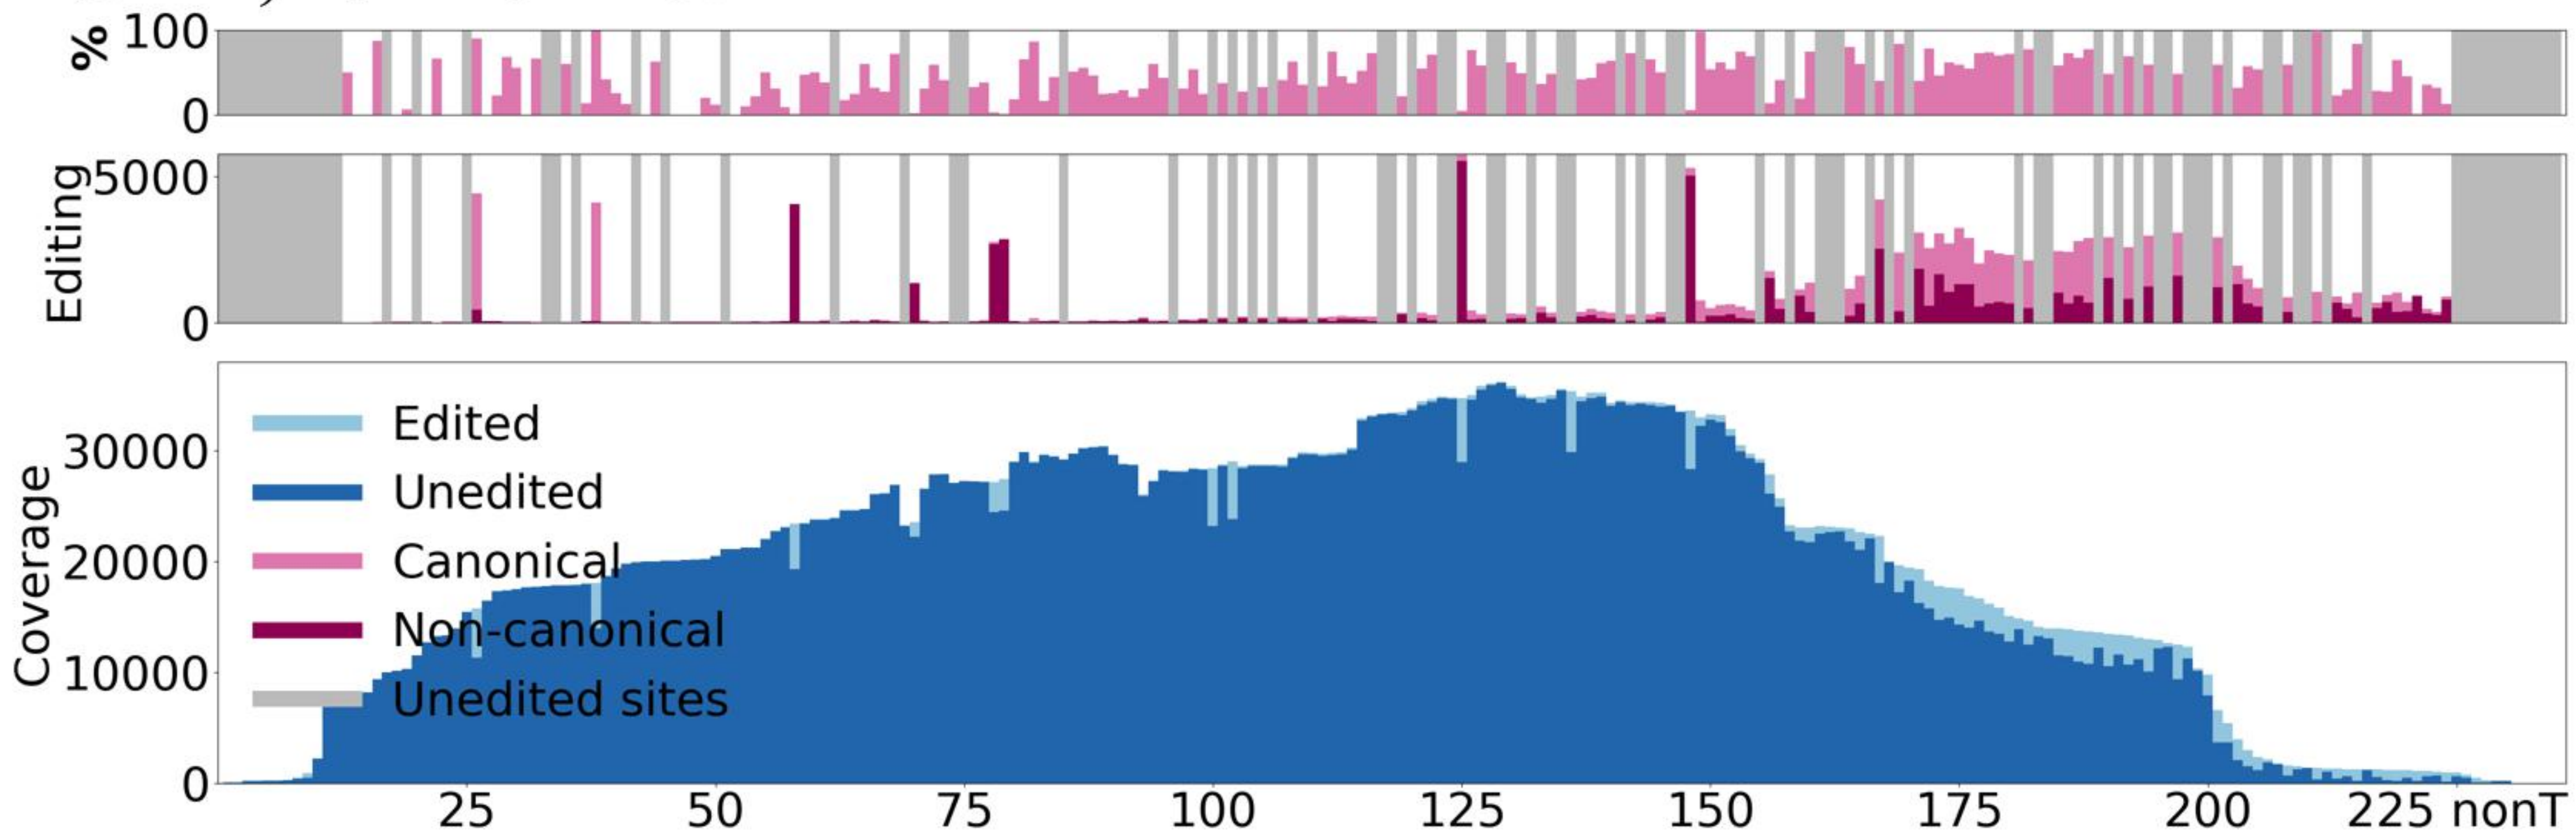

# SYL, ND9 : total

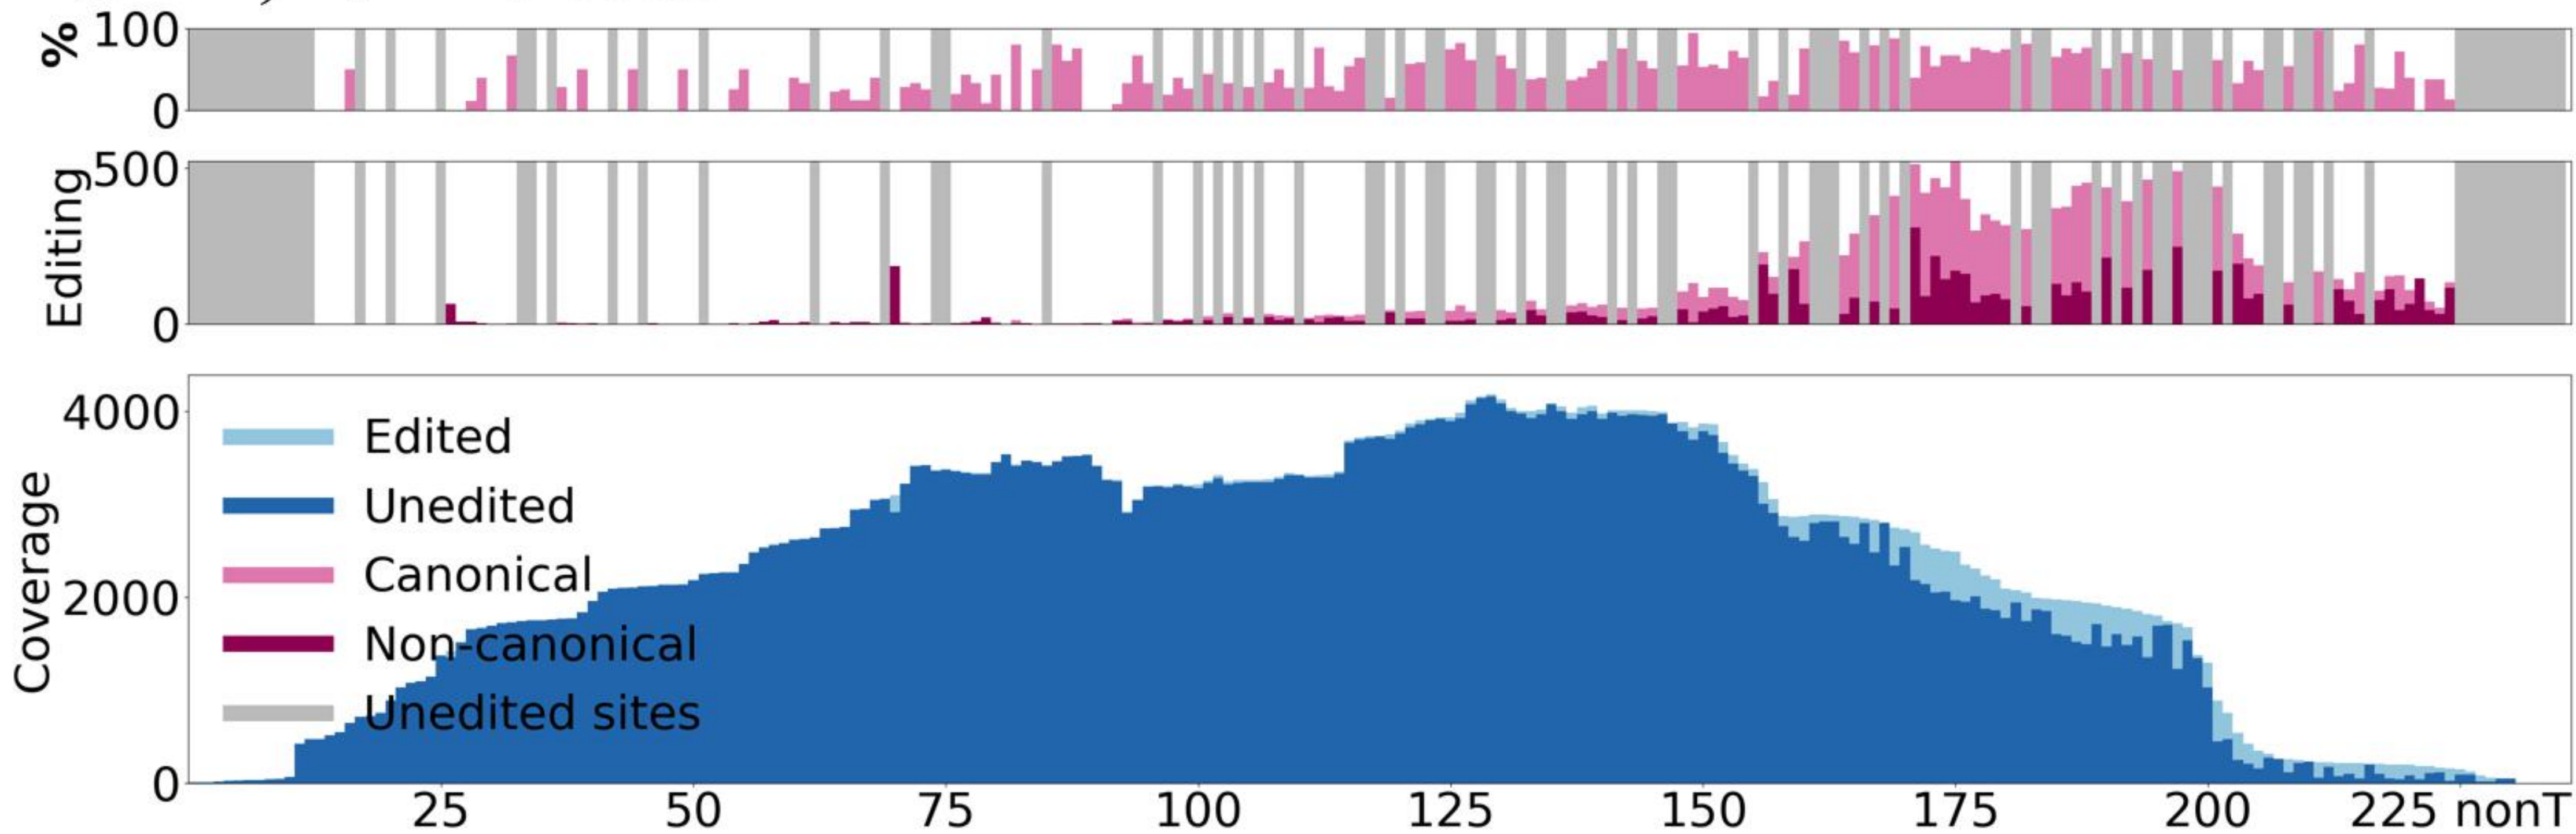

# SYL, ND9 : total

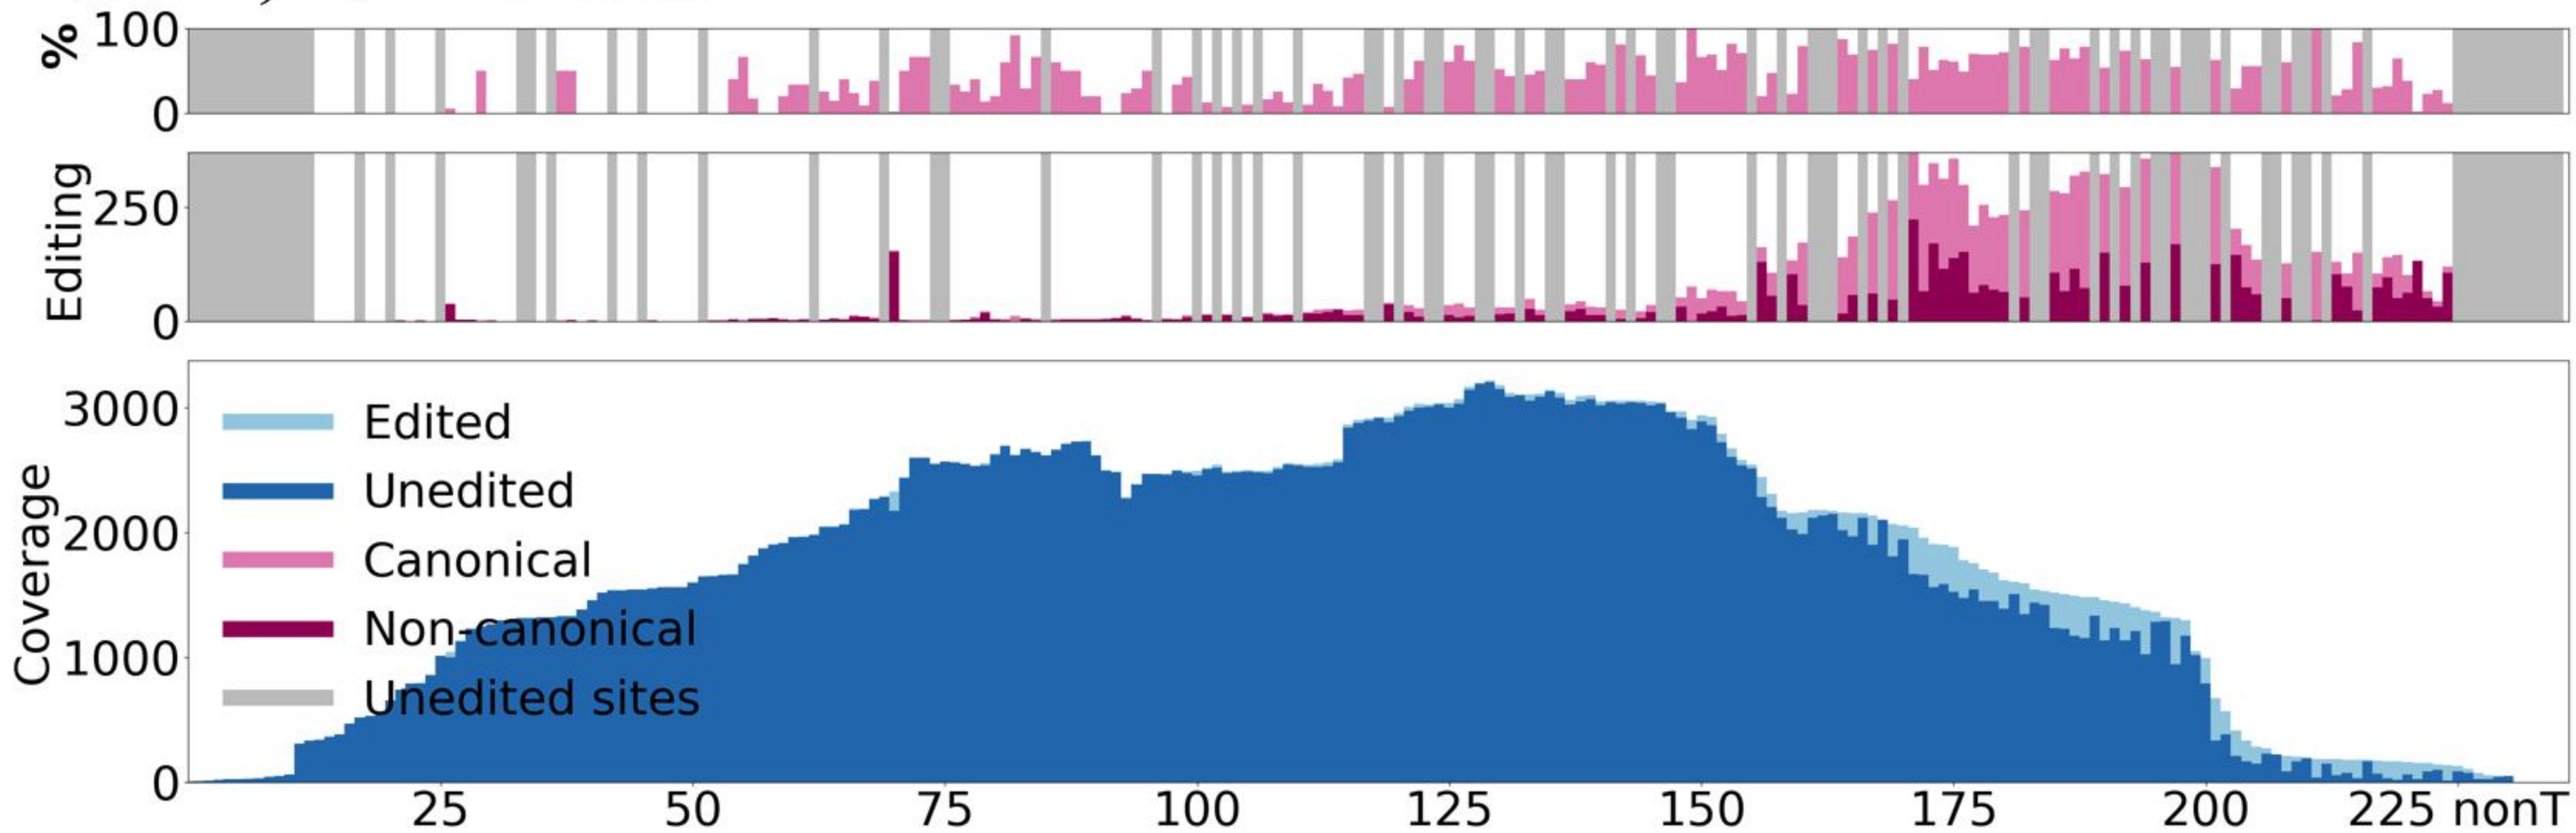

# SYL, RPS12 : fed

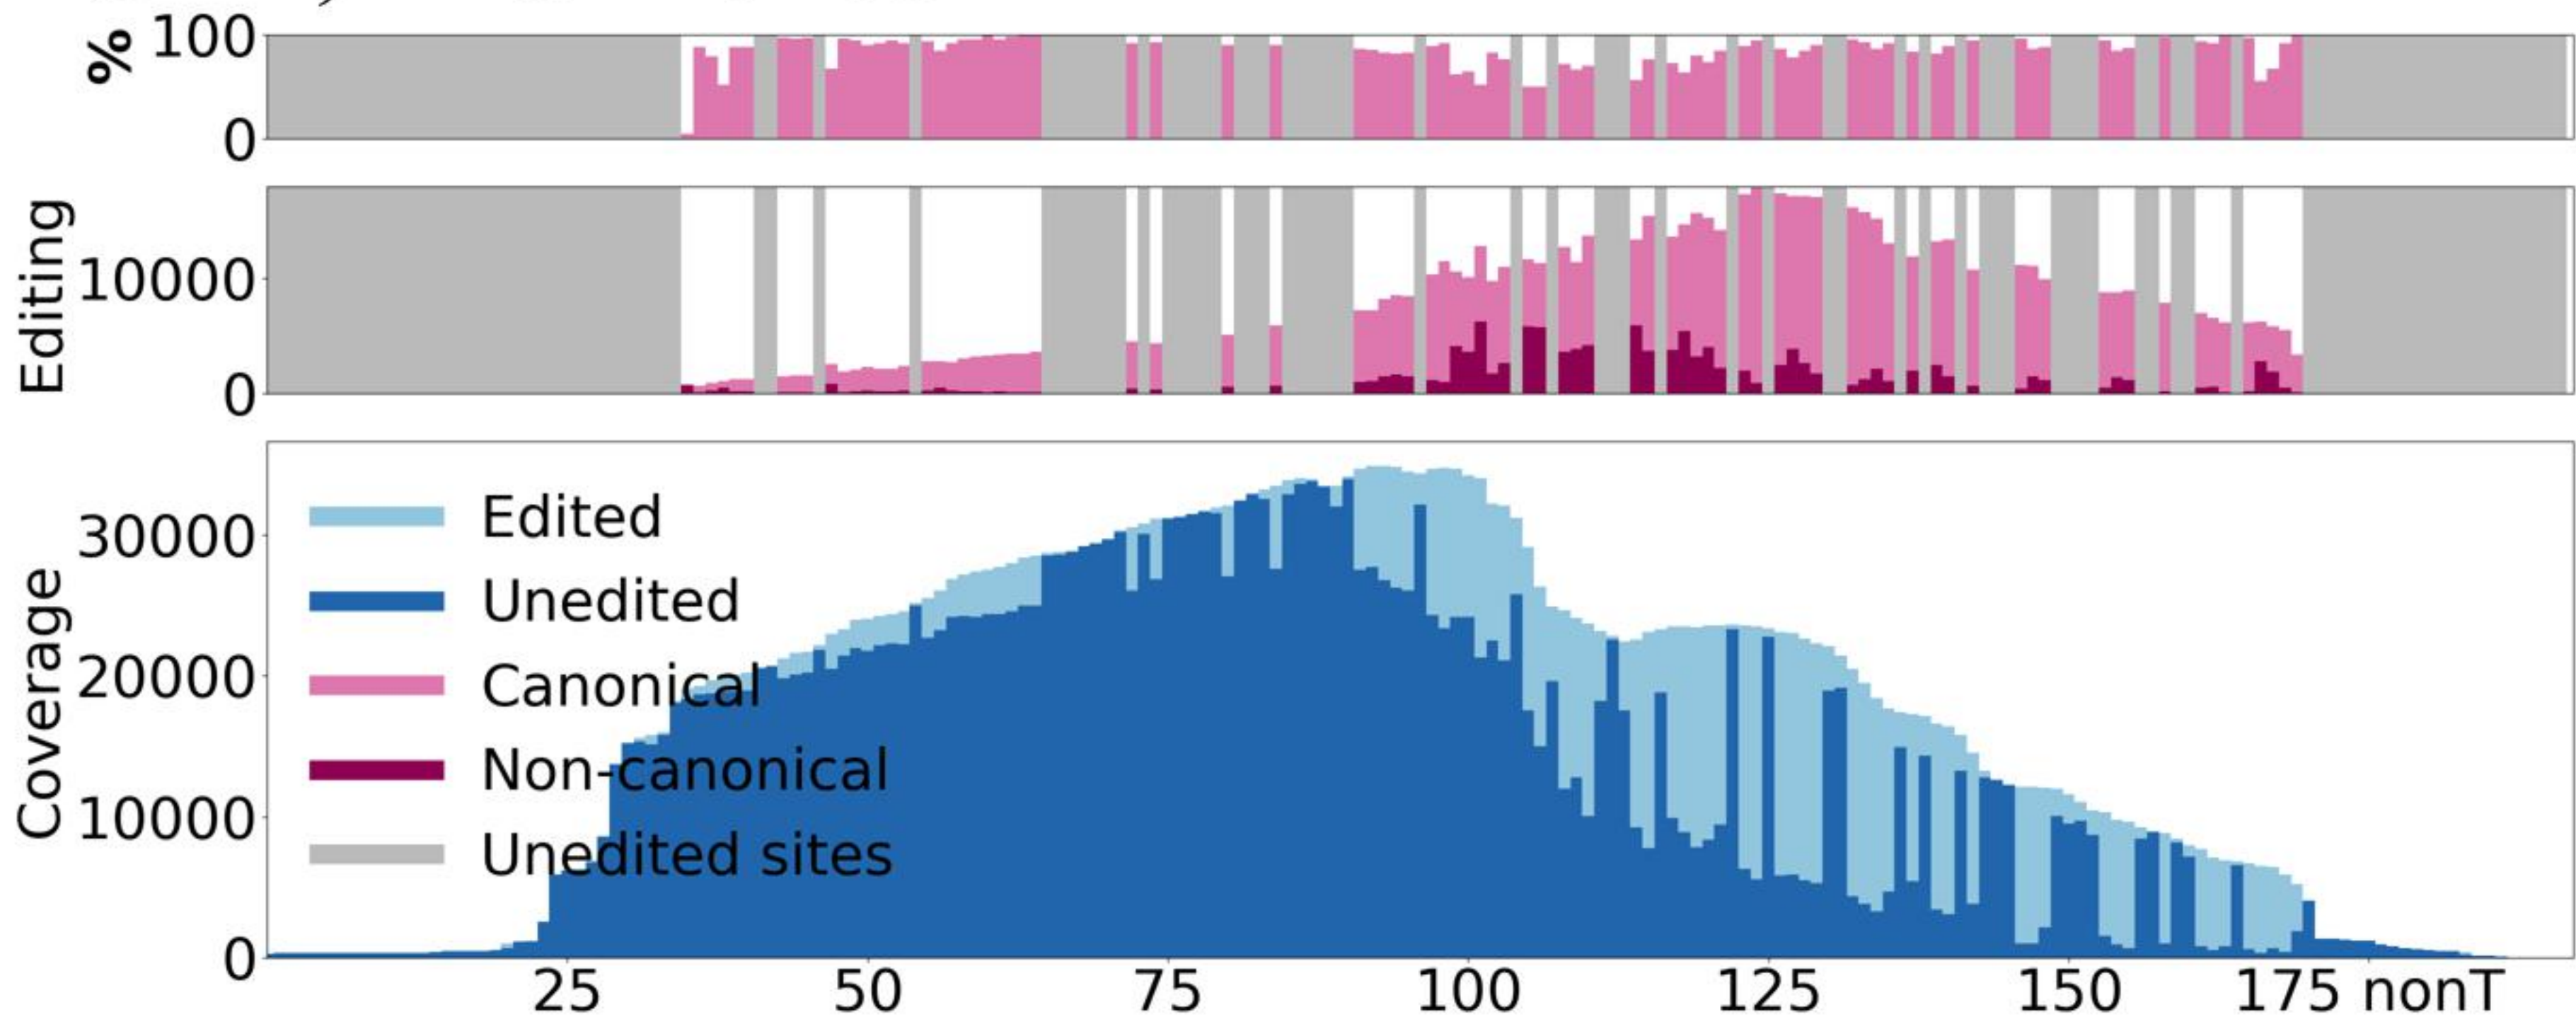

# SYL, RPS12 : fed

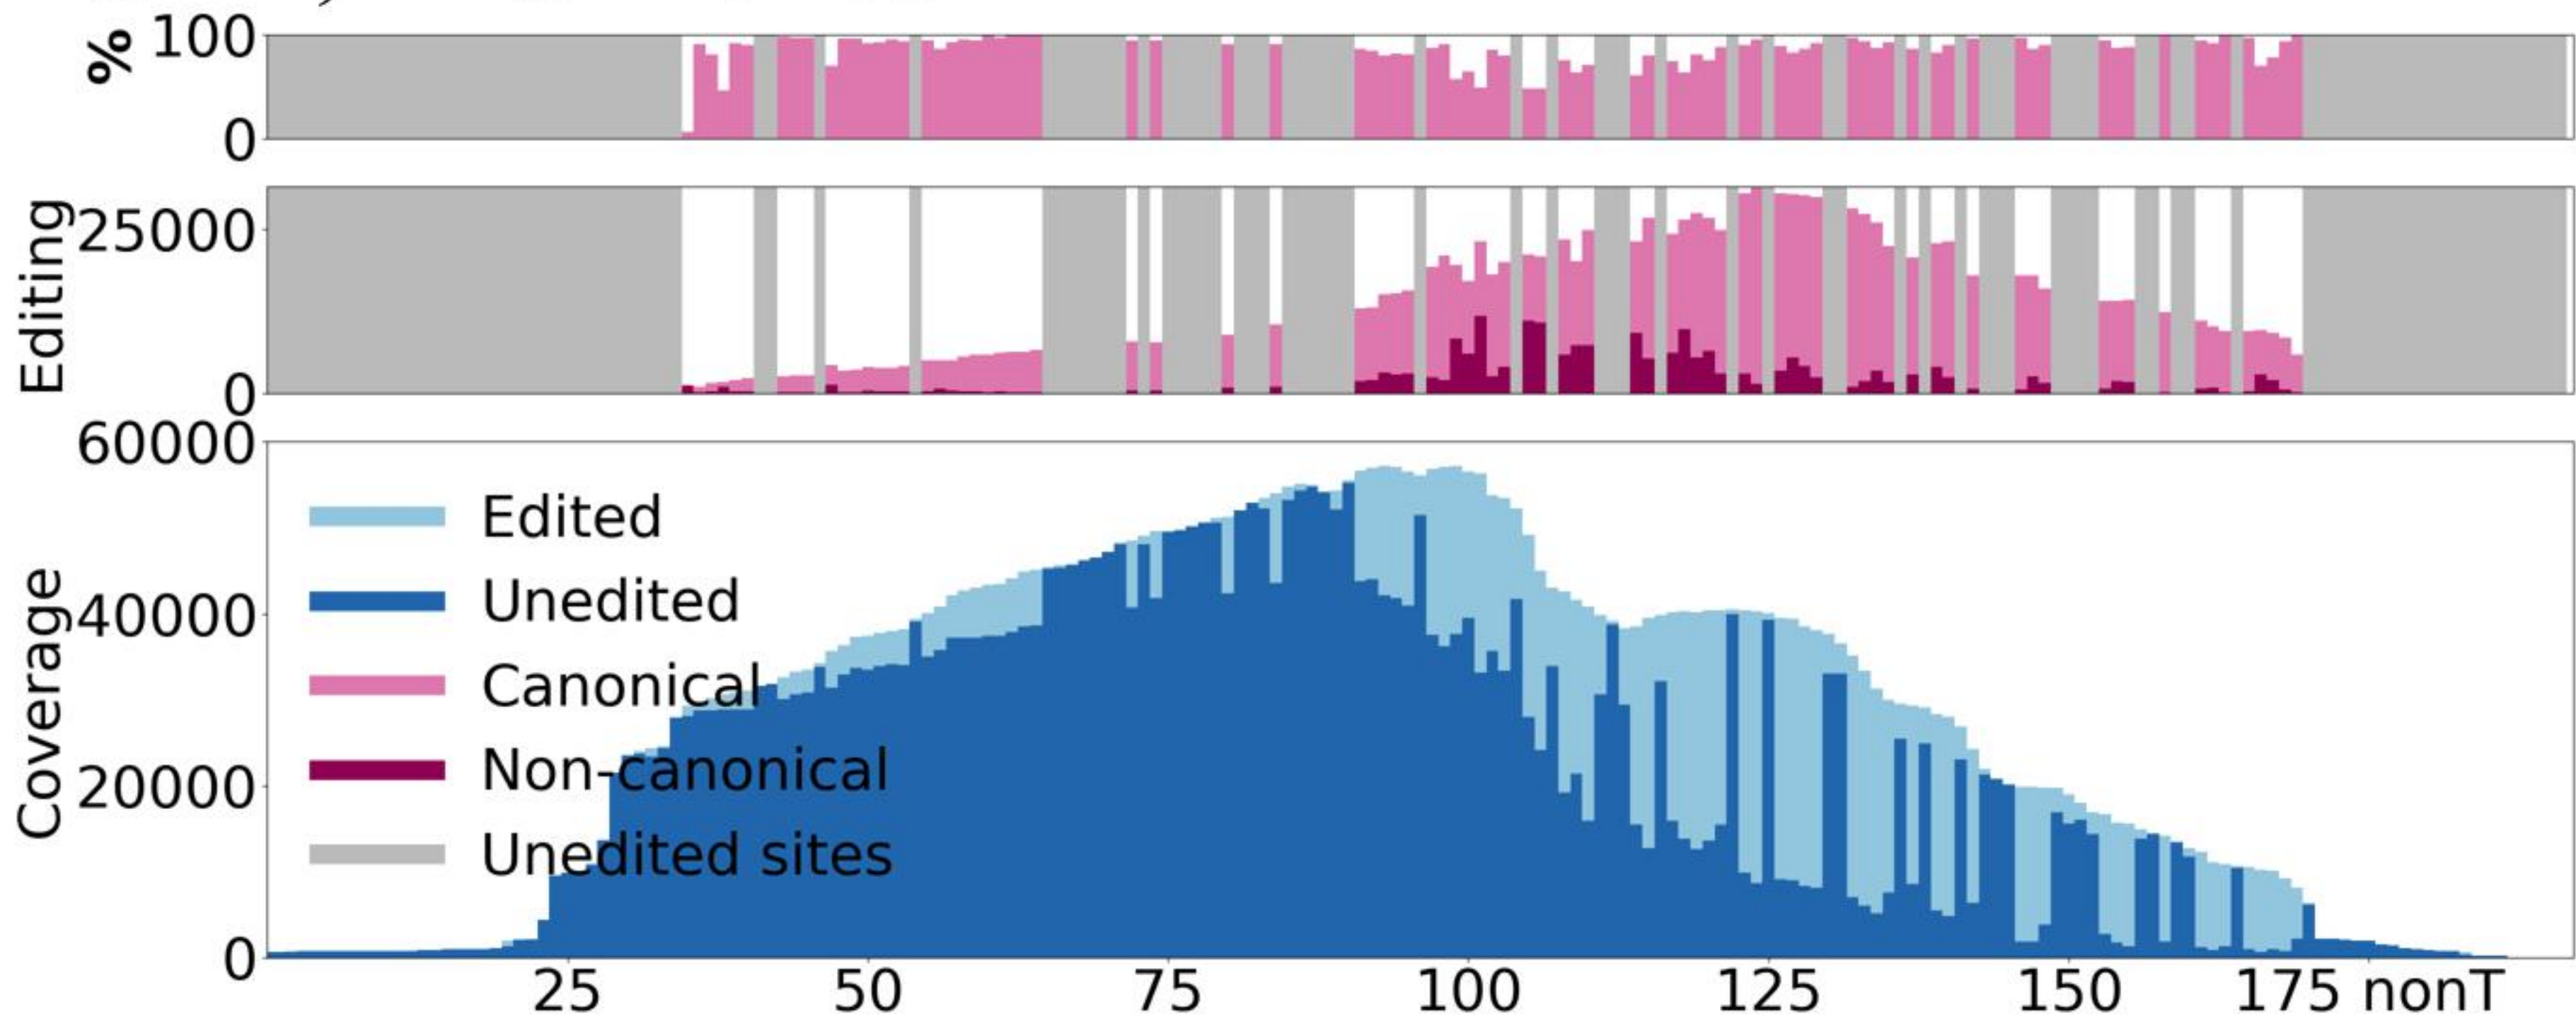

# SYL, RPS12 : abrupt

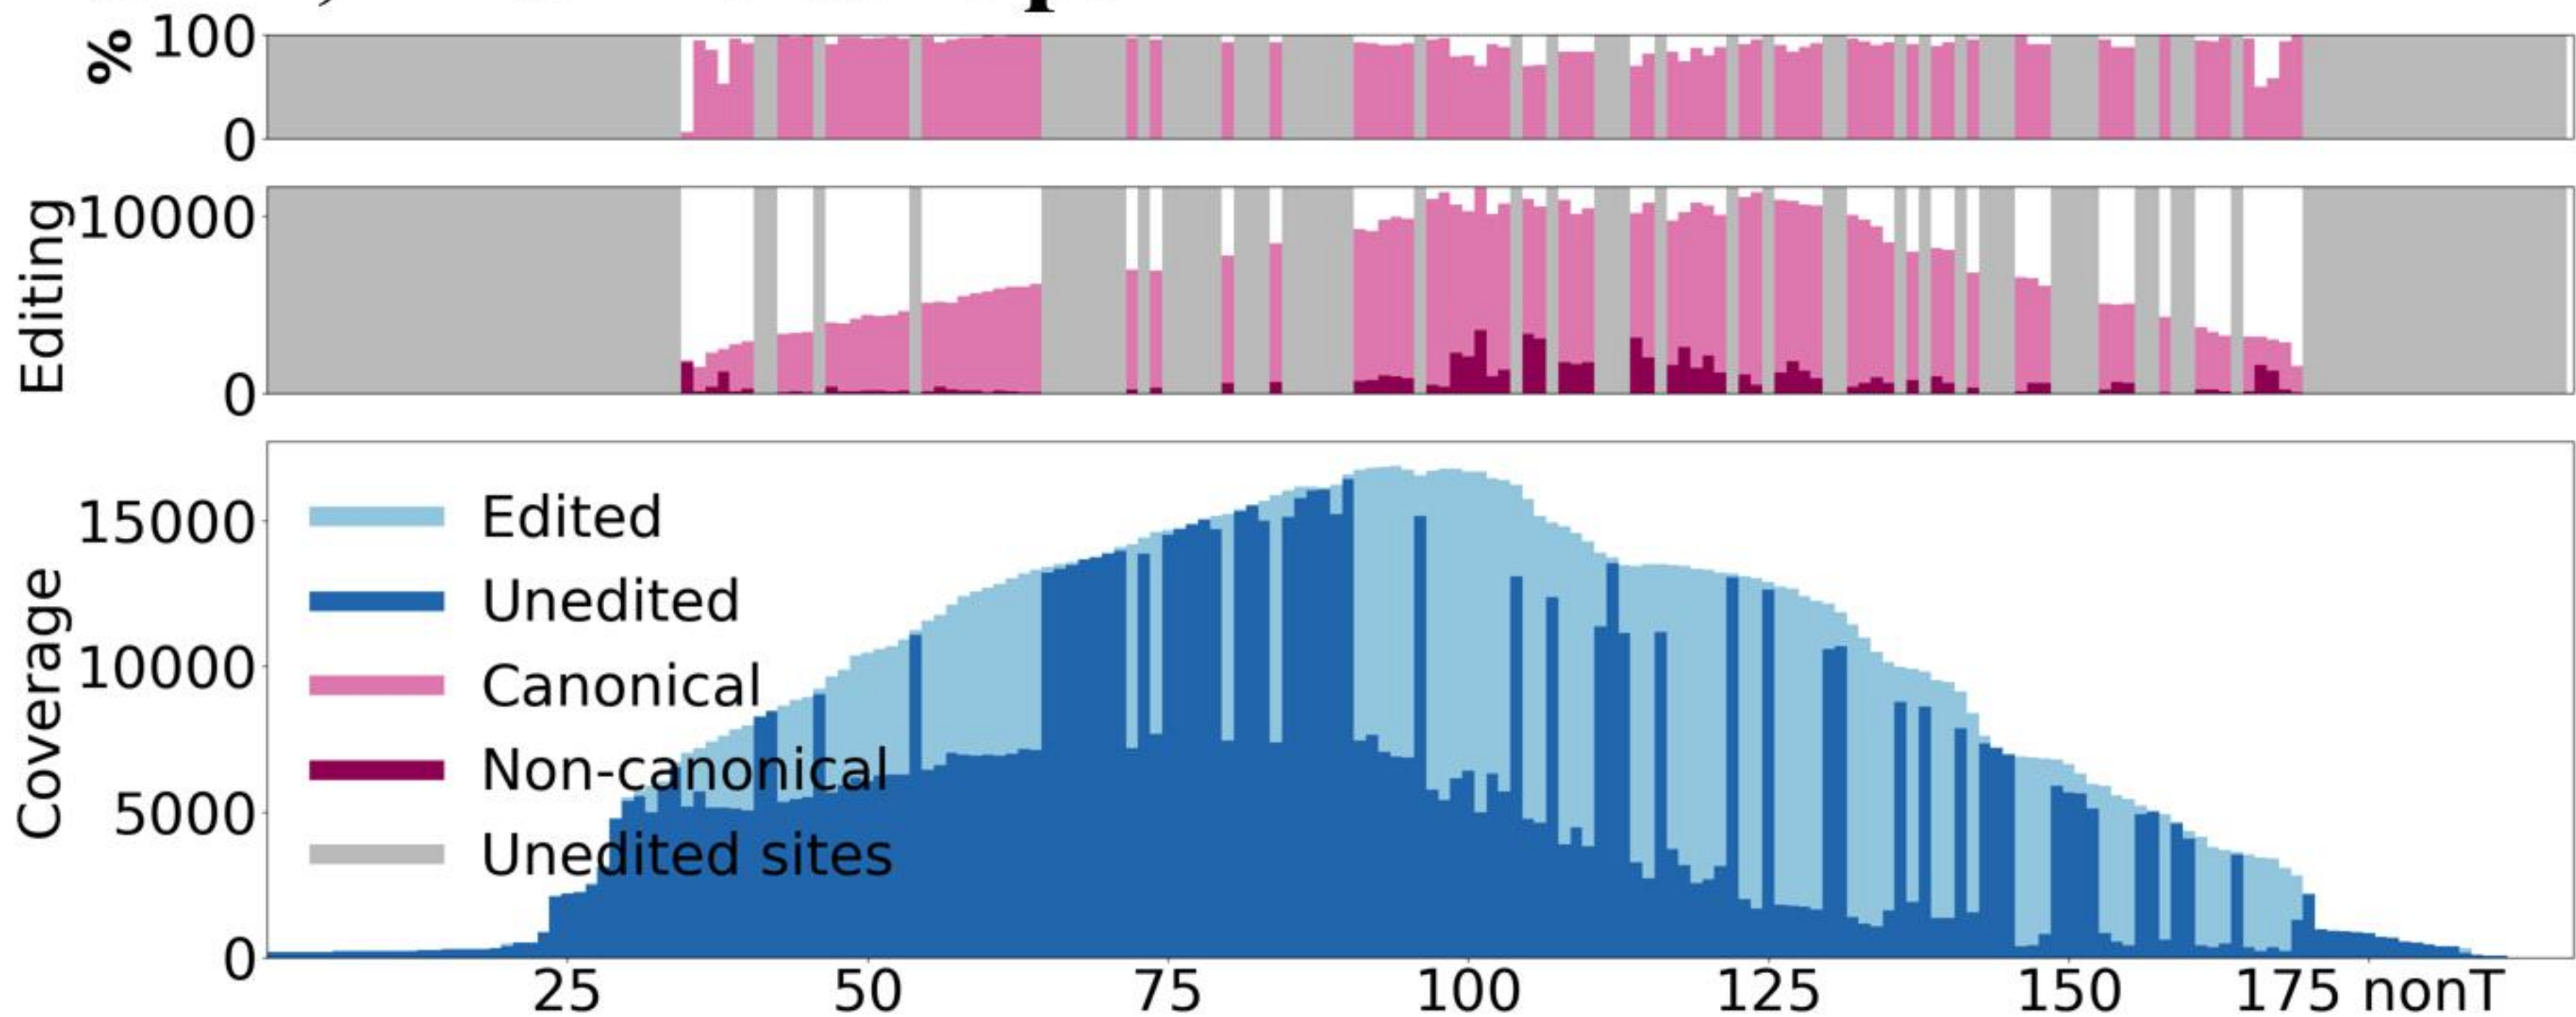

# SYL, RPS12 : abrupt

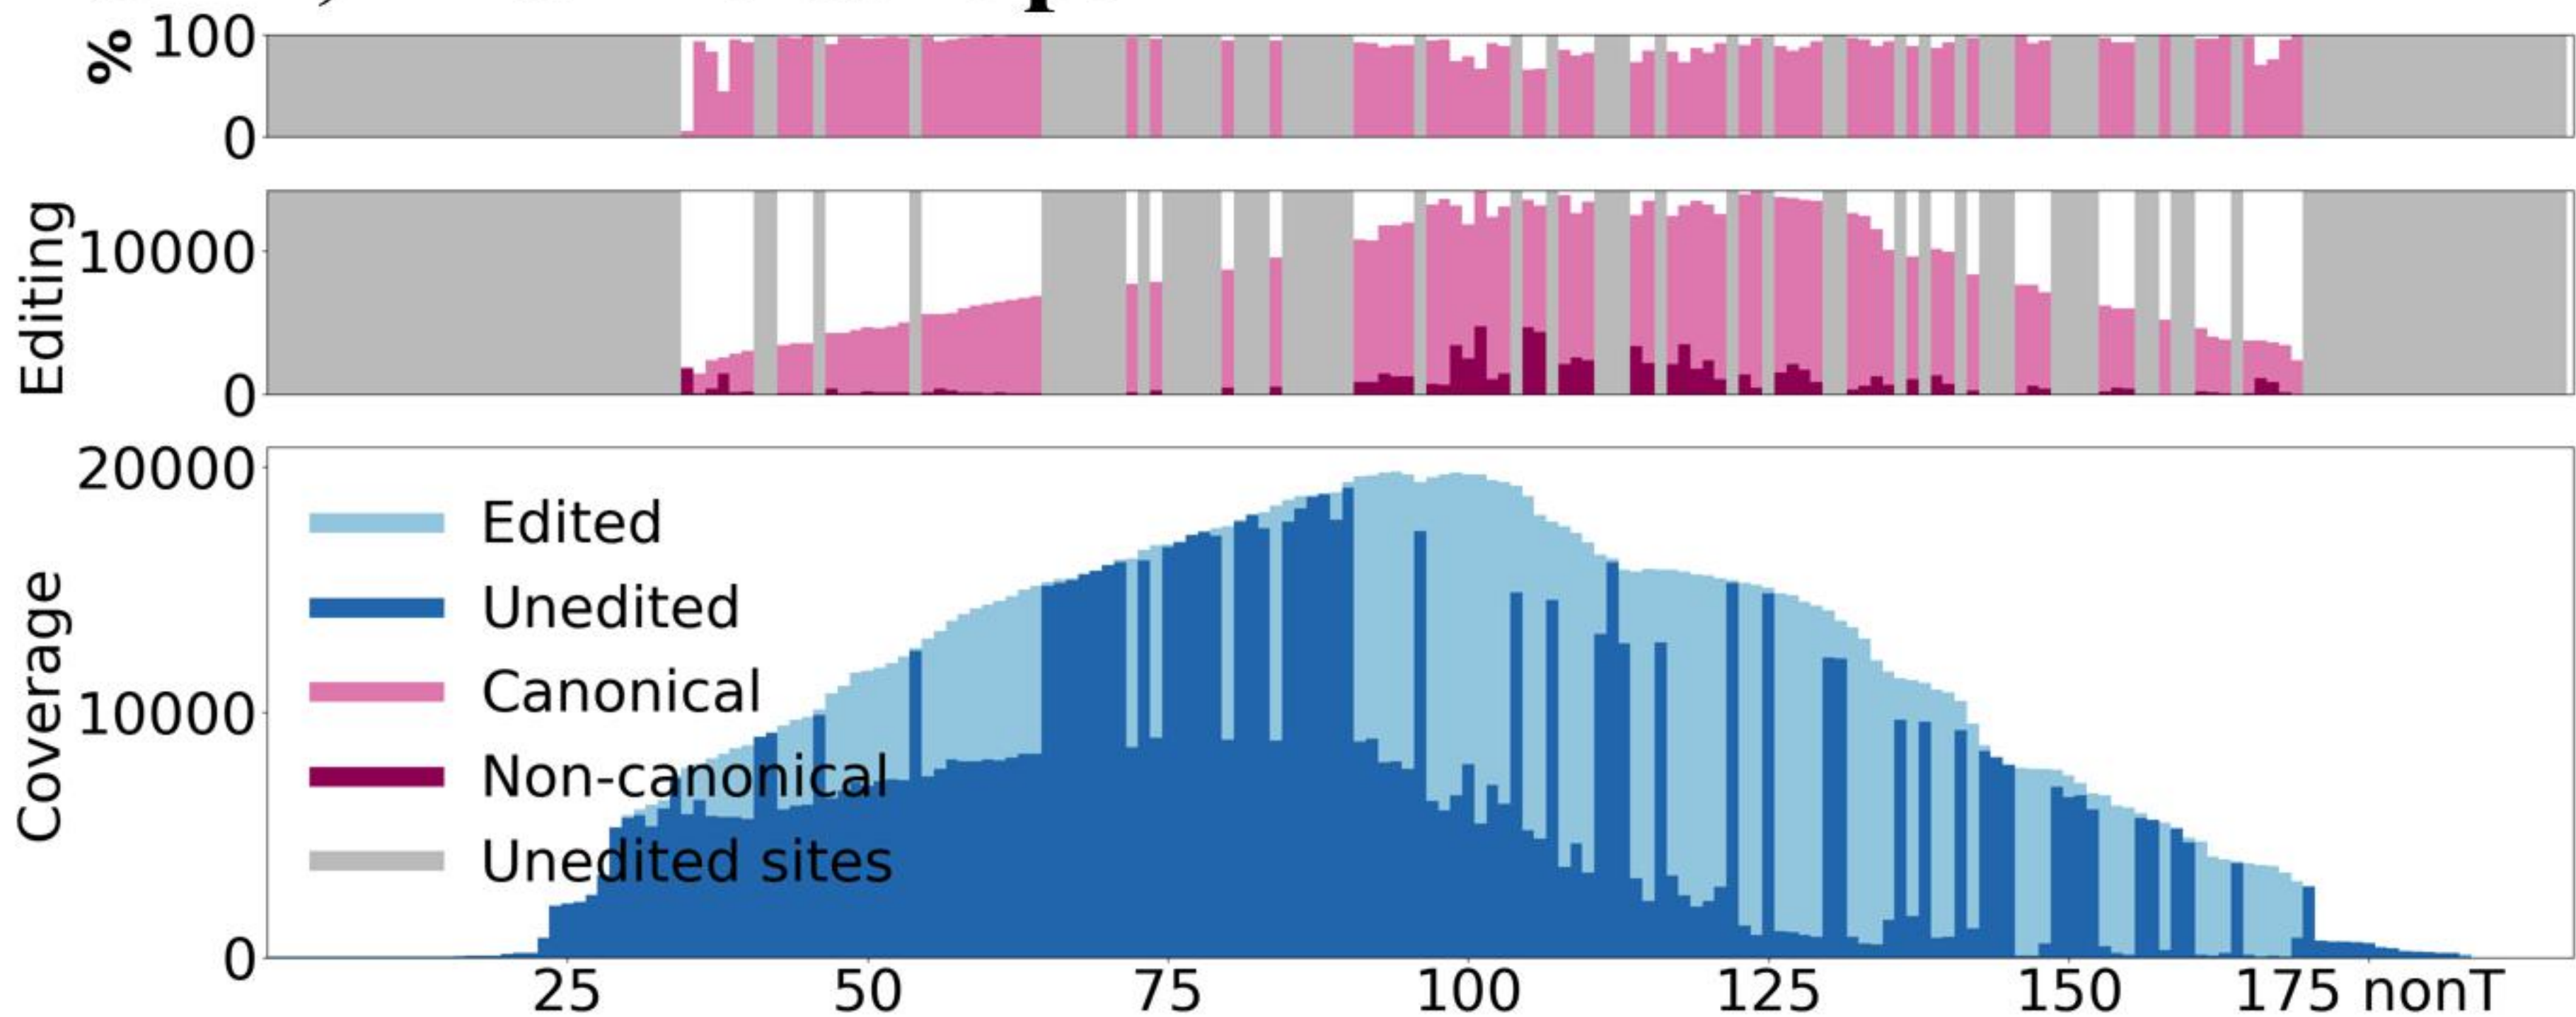

# SYL, RPS12 : slow

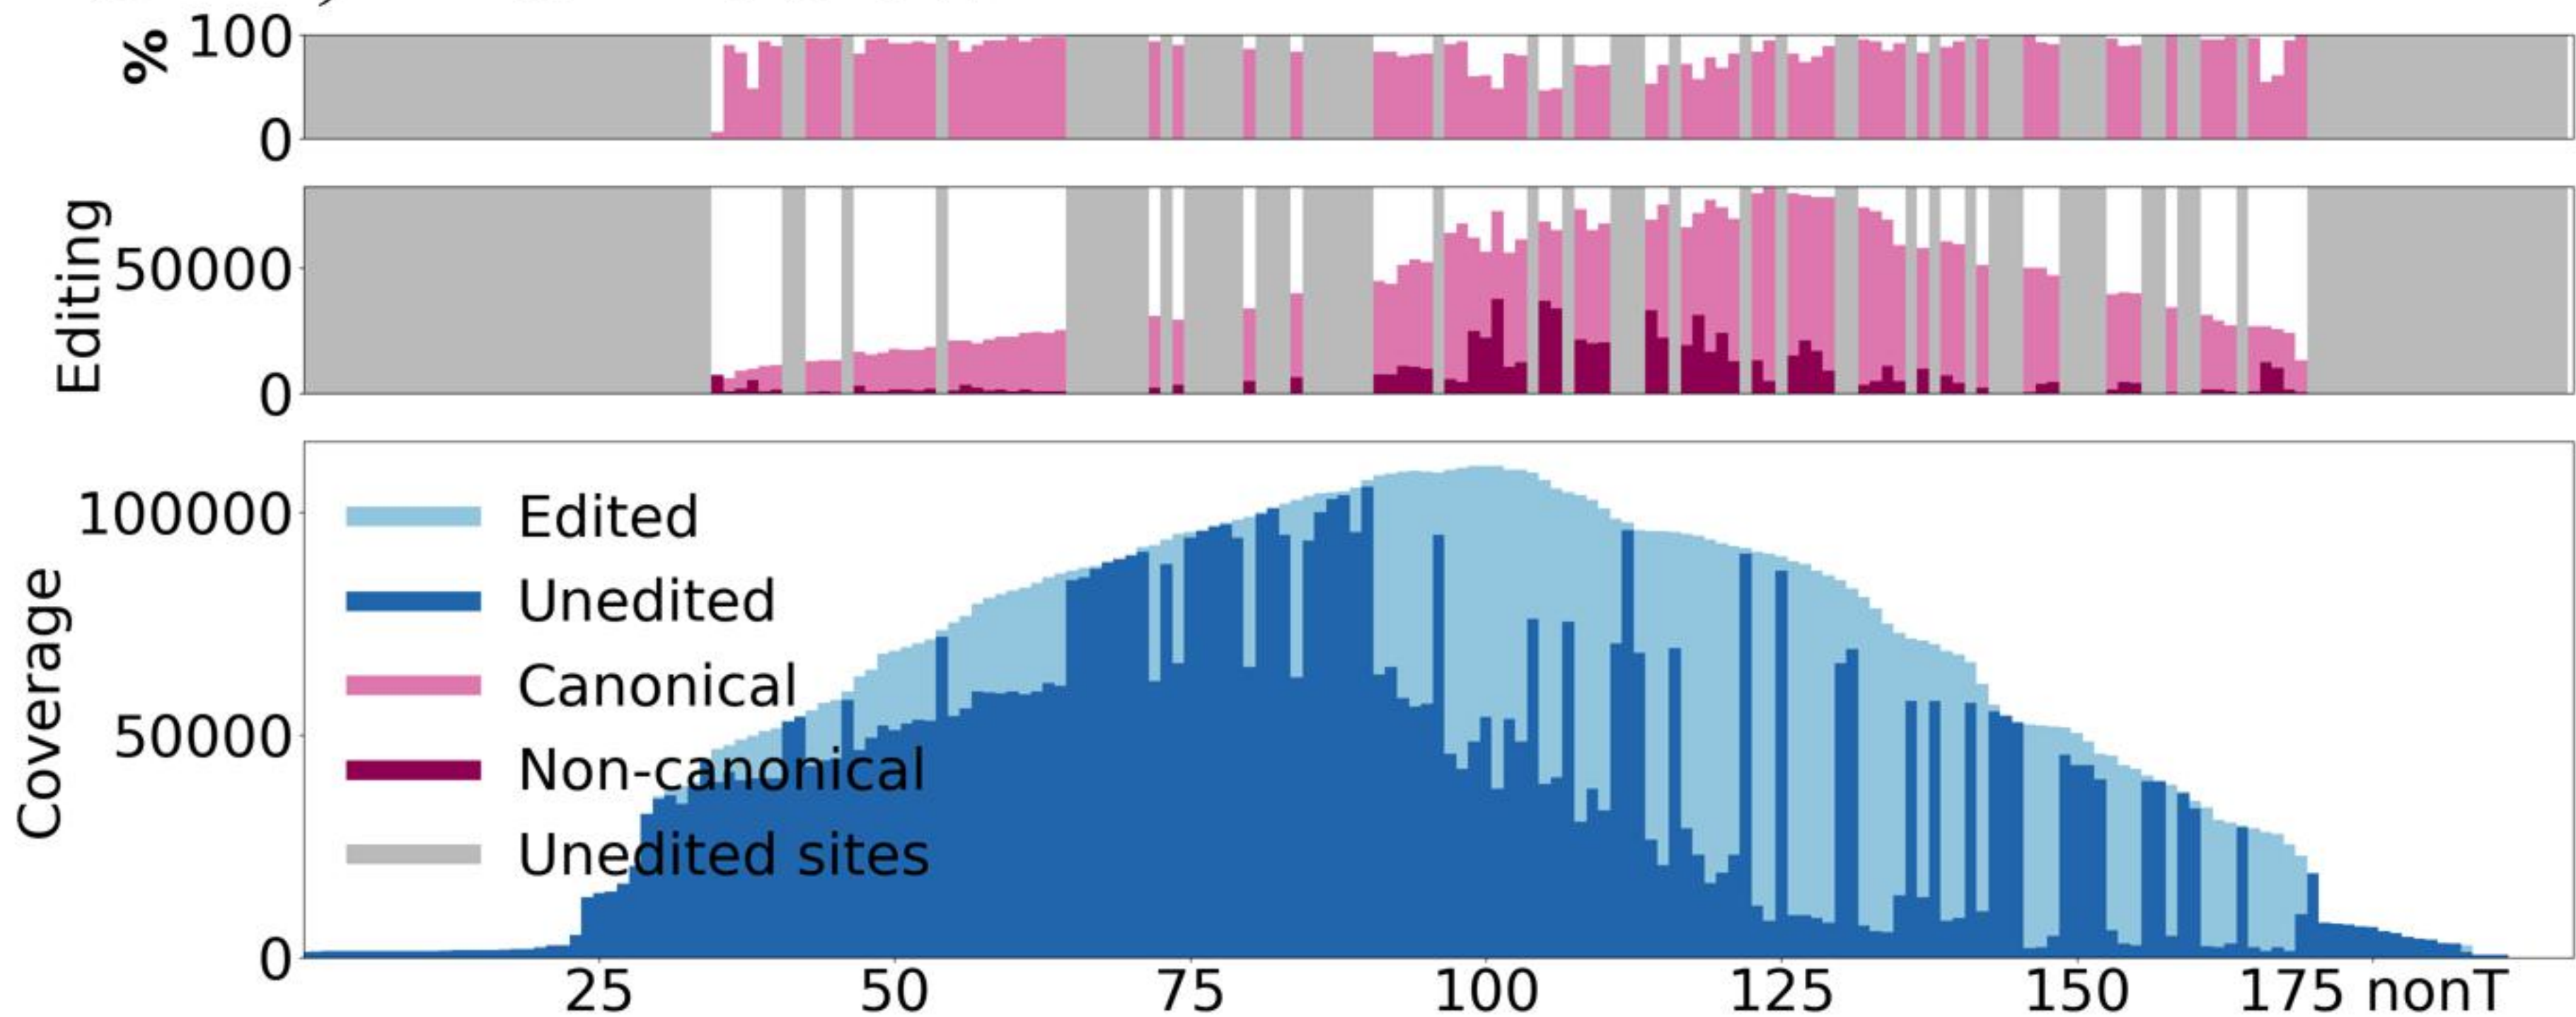

# SYL, RPS12 : slow

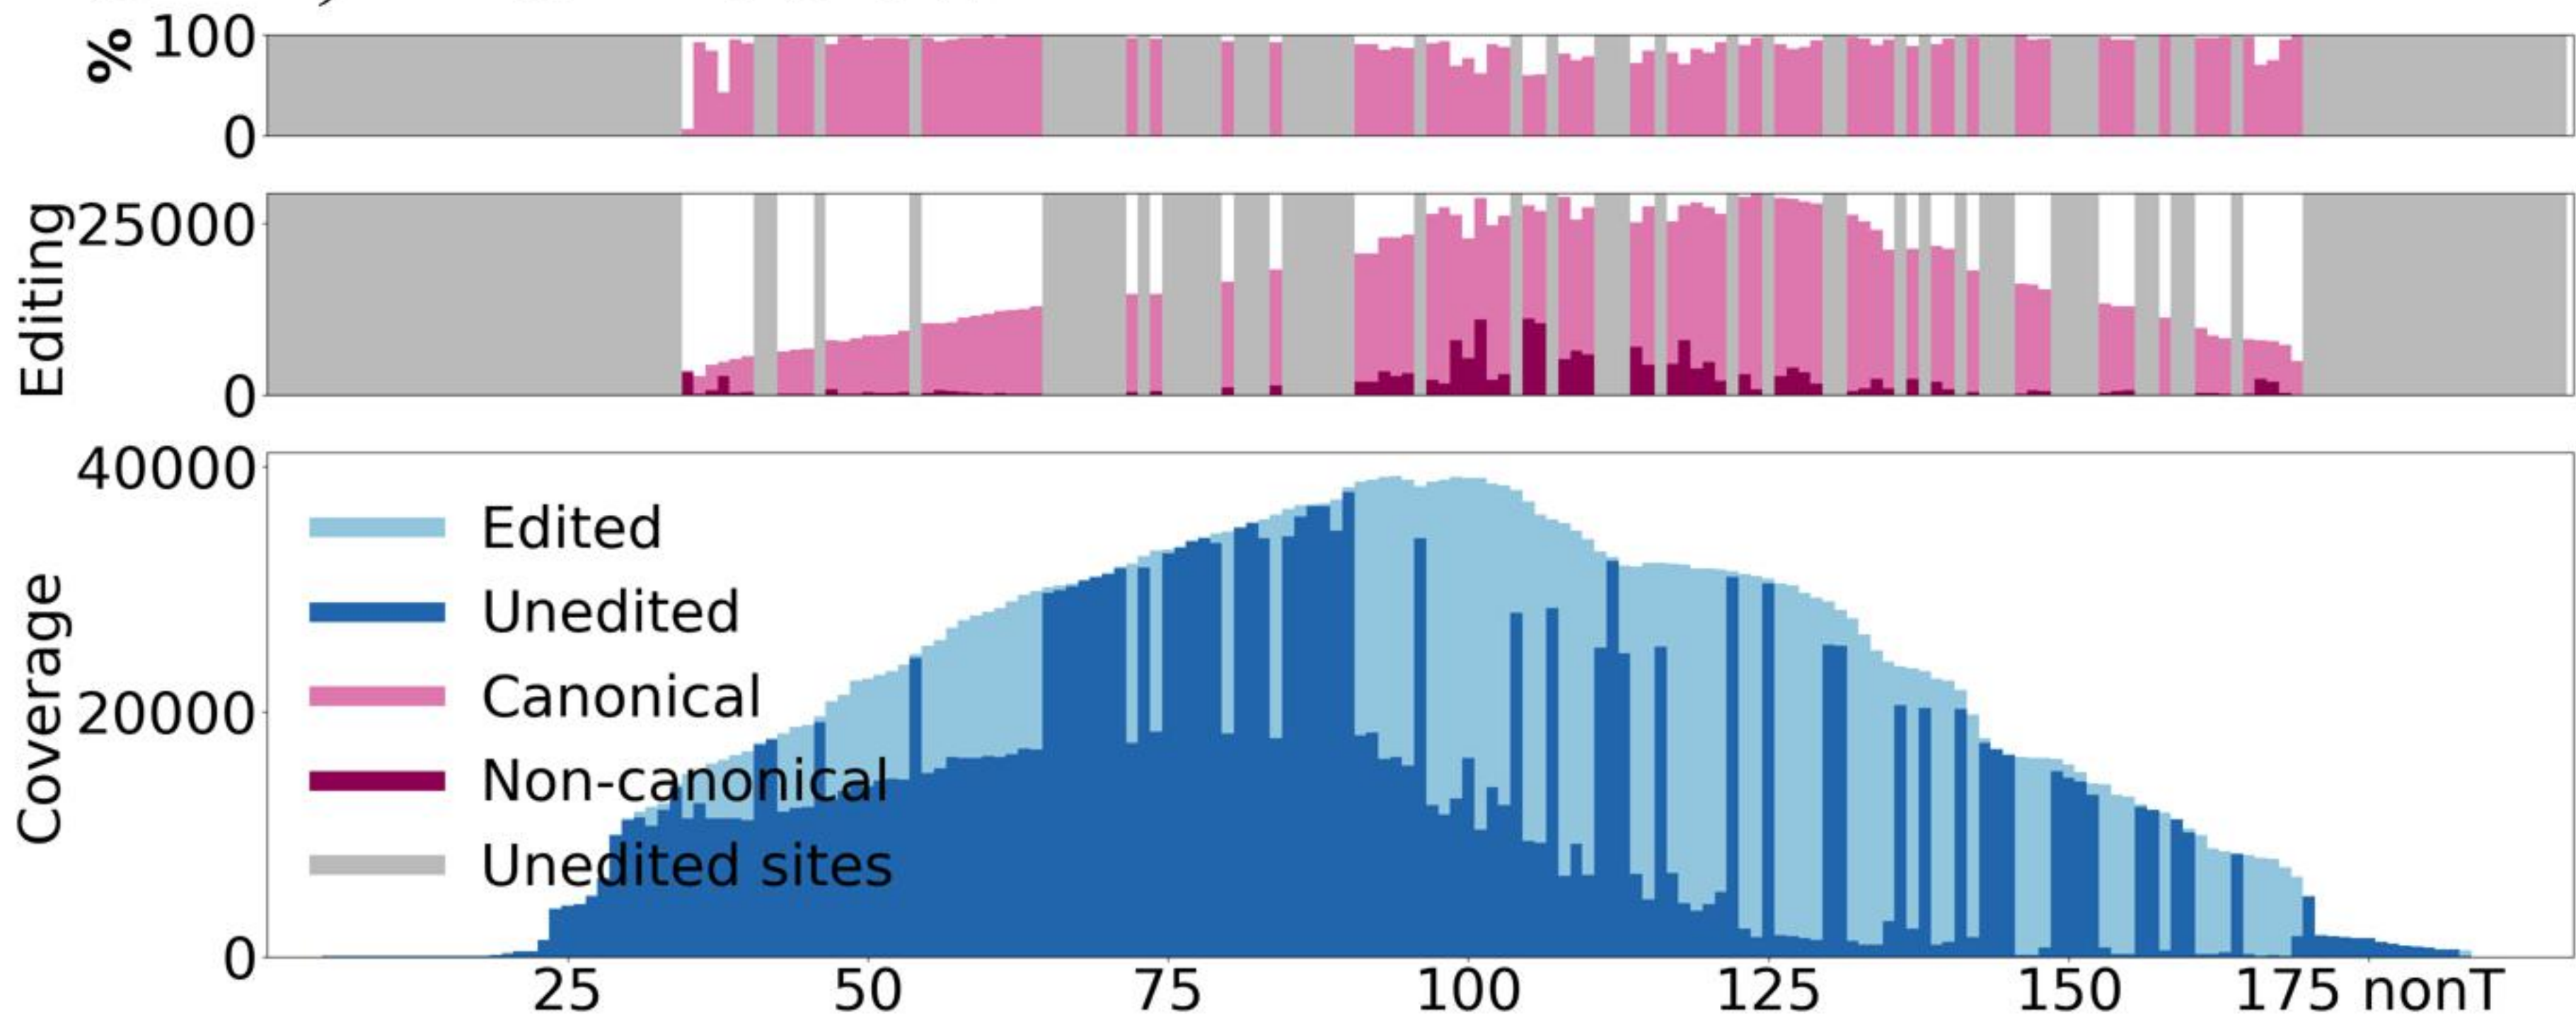

# SYL, RPS12 : mito

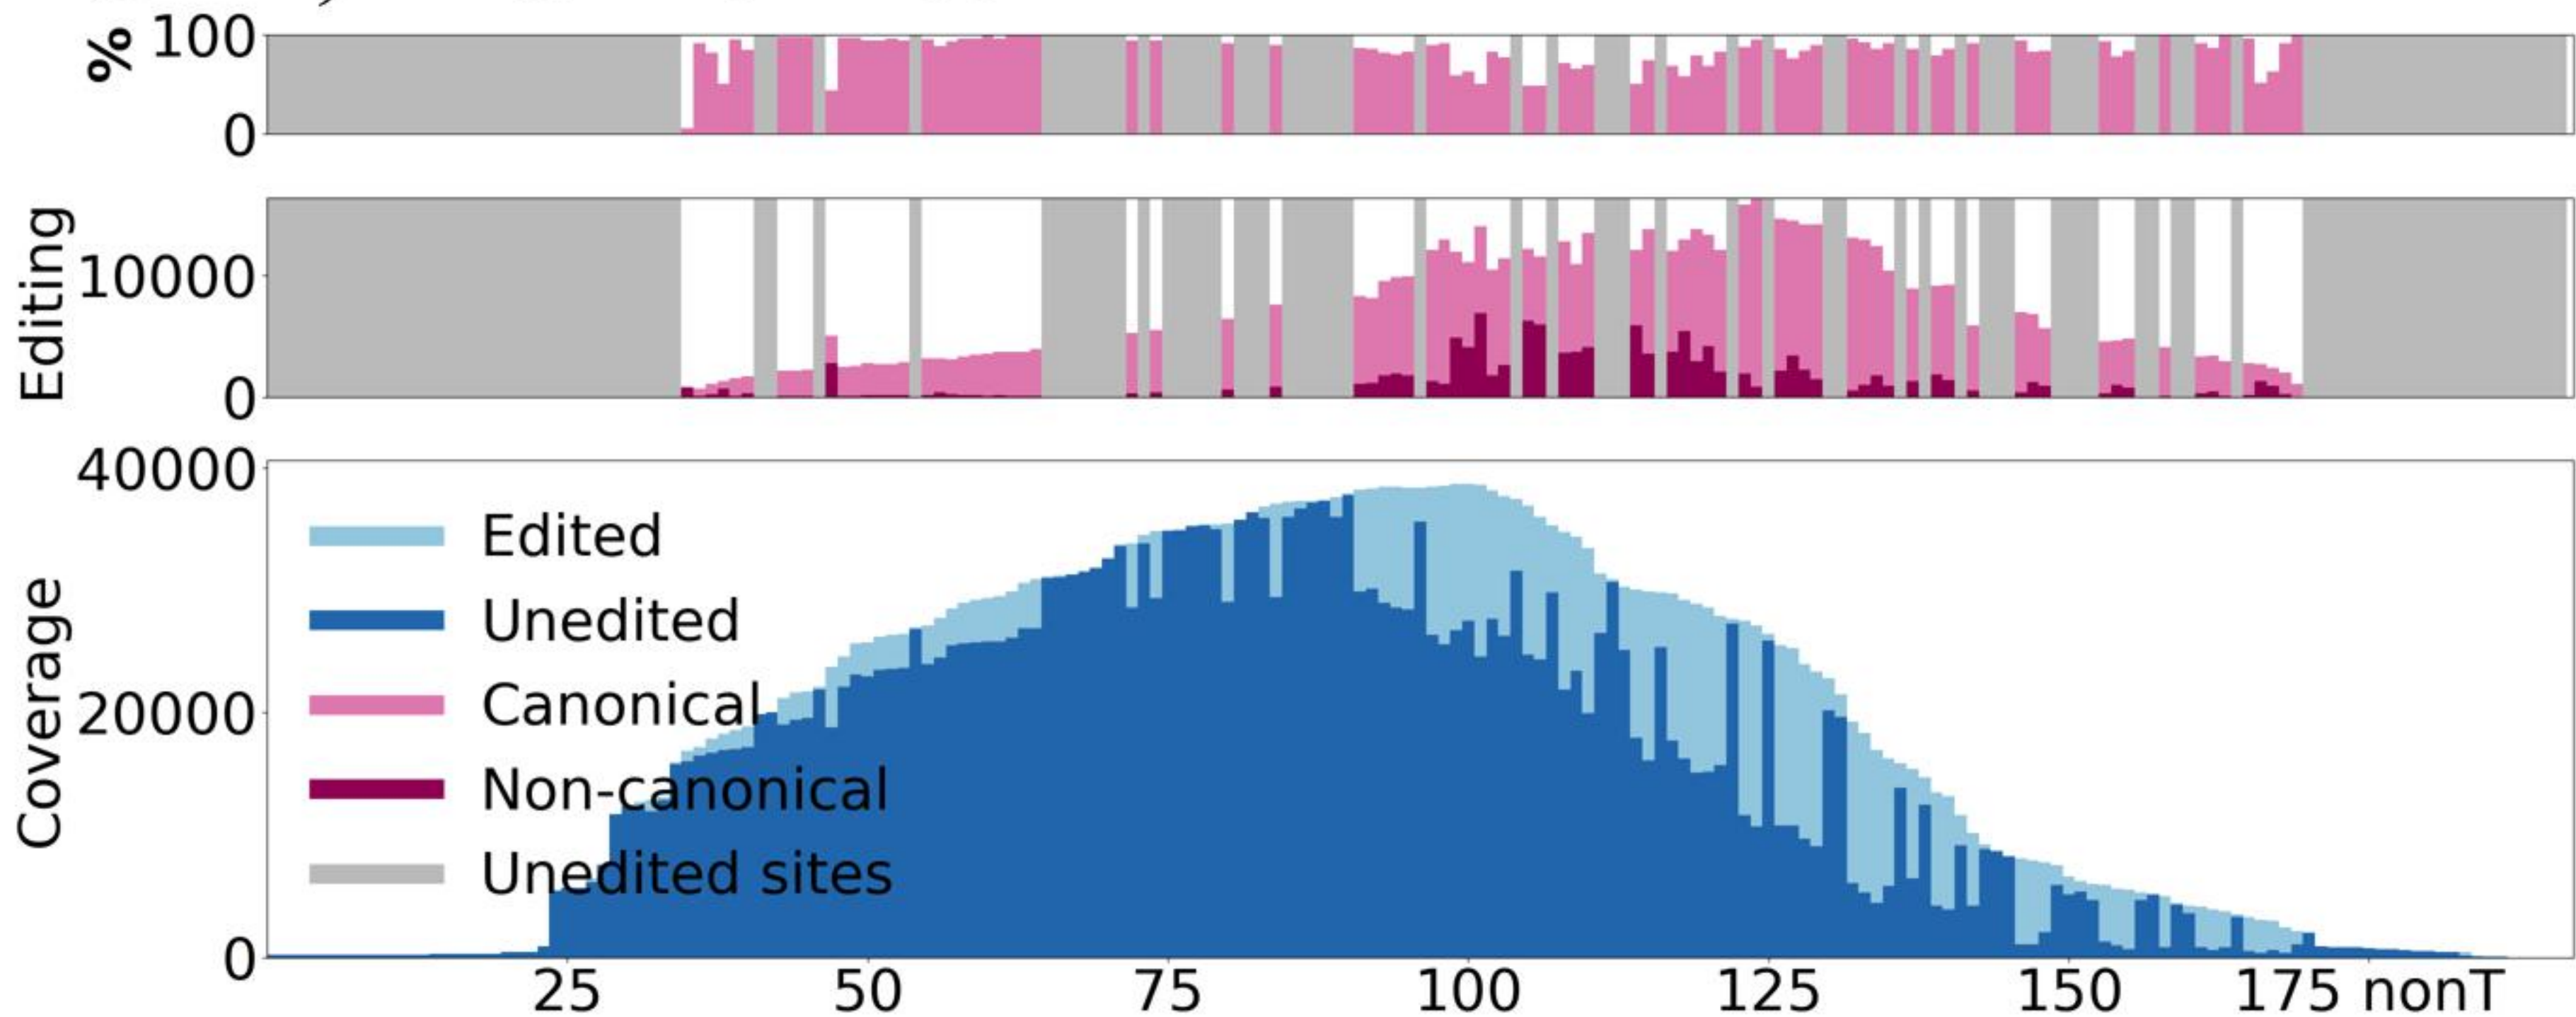

# SYL, RPS12 : mito

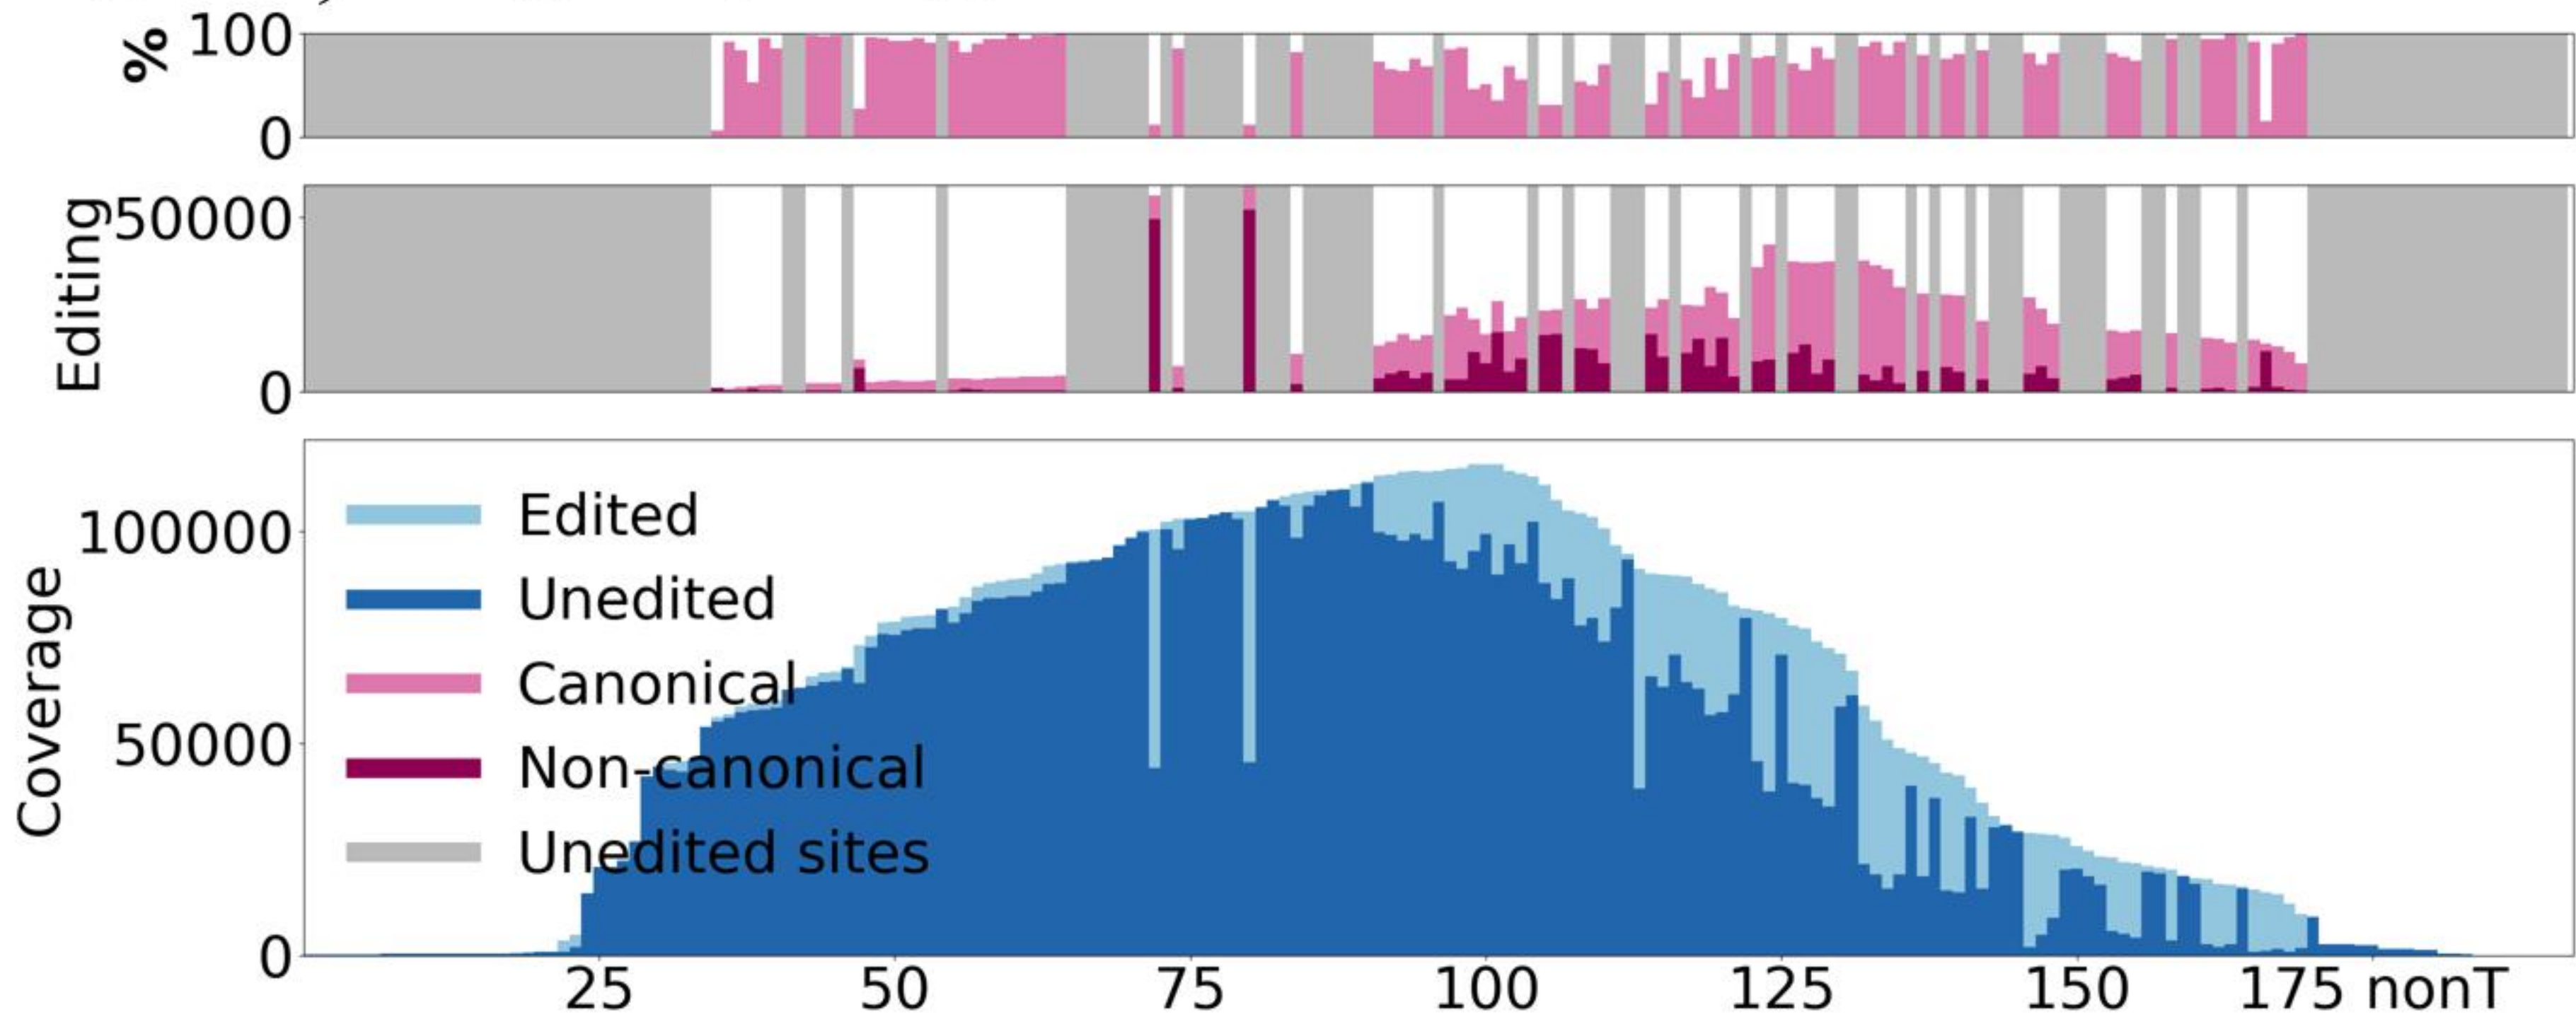

# SYL, RPS12 : total

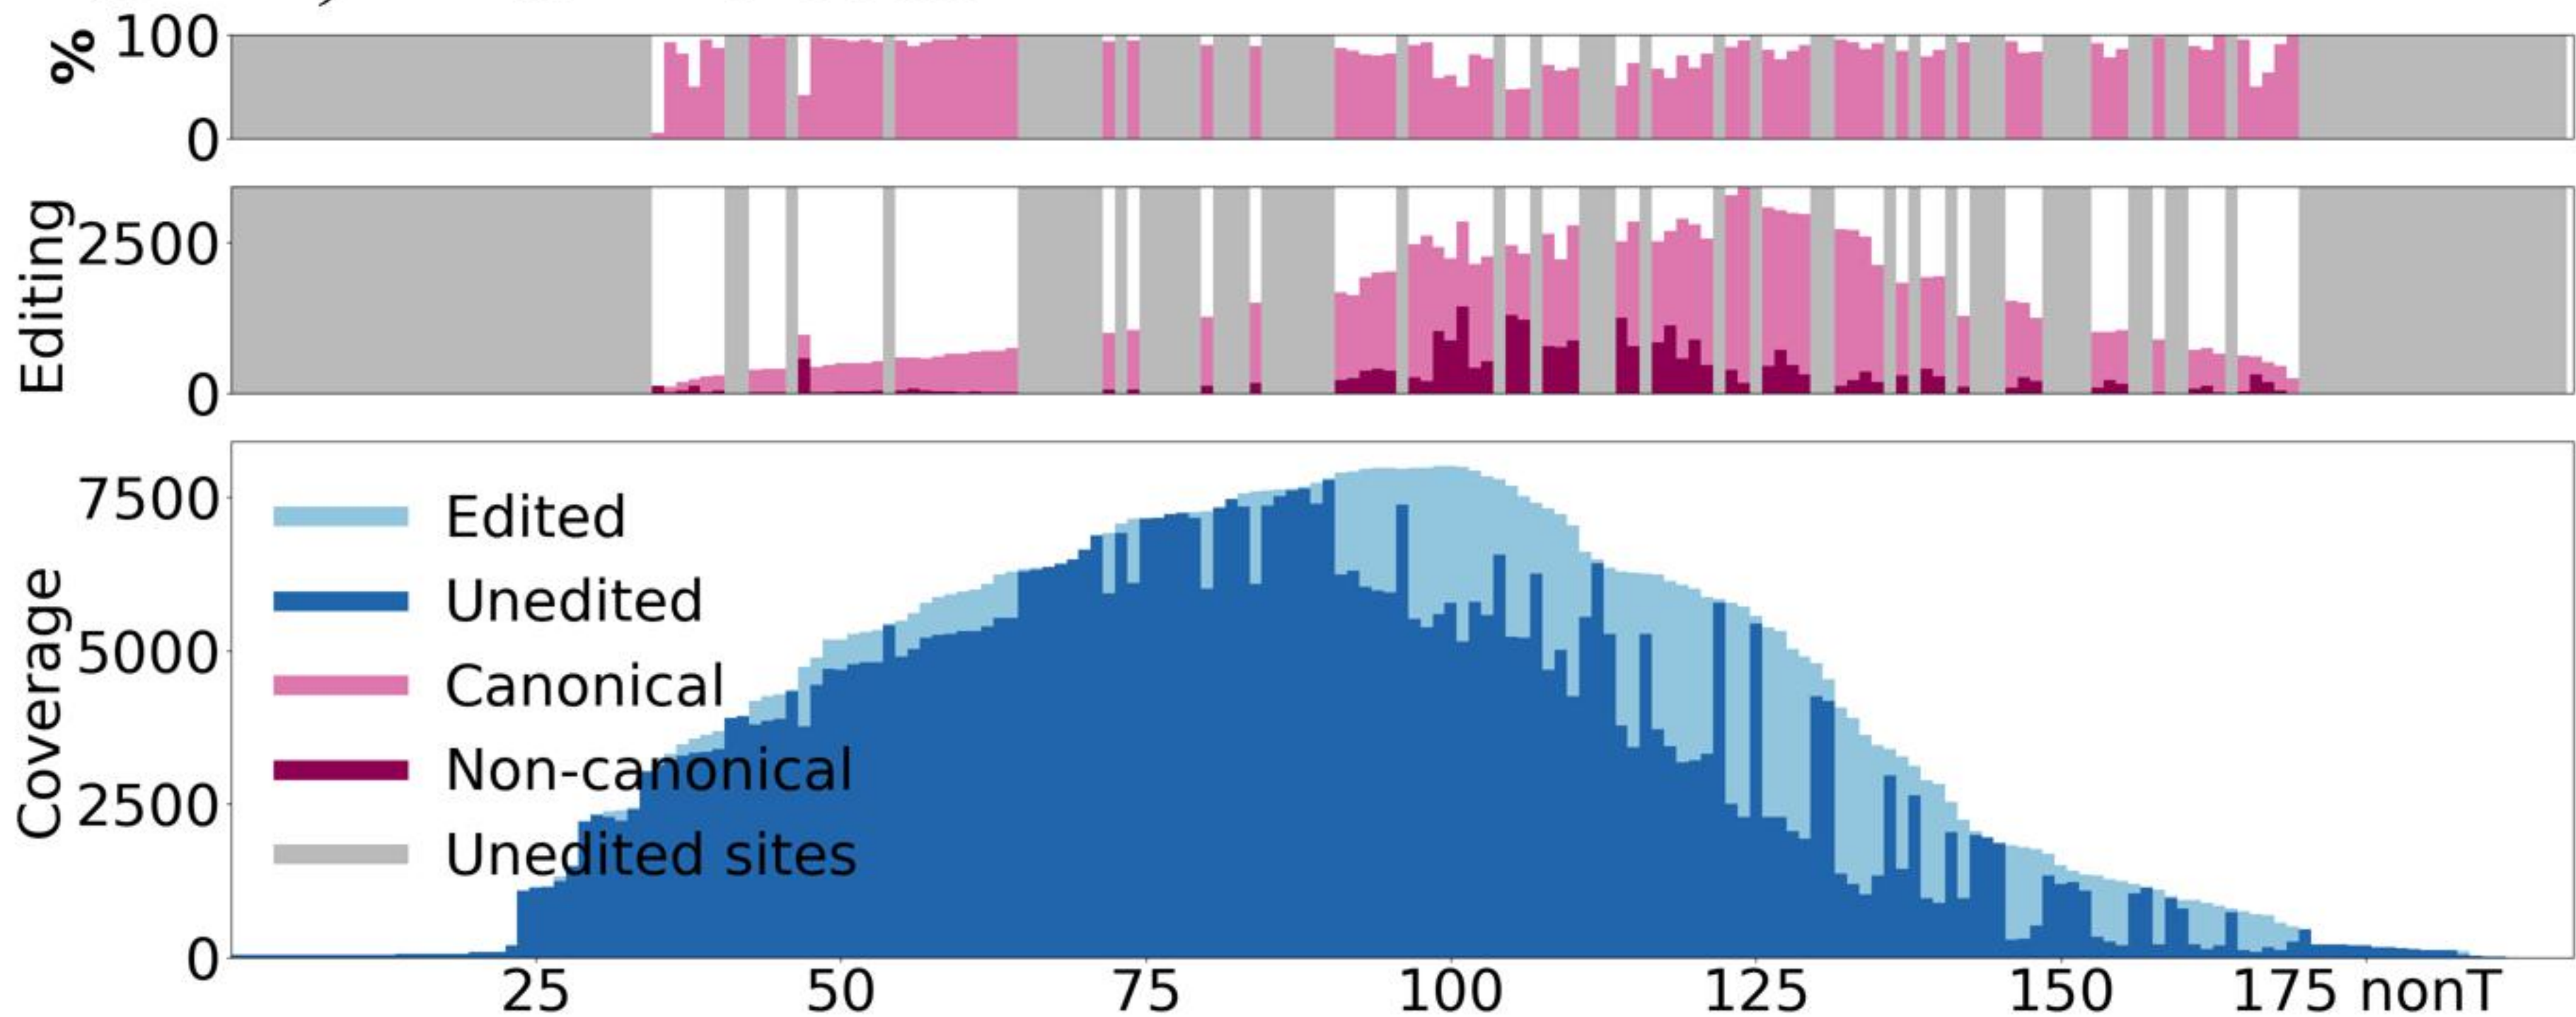

# SYL, RPS12 : total

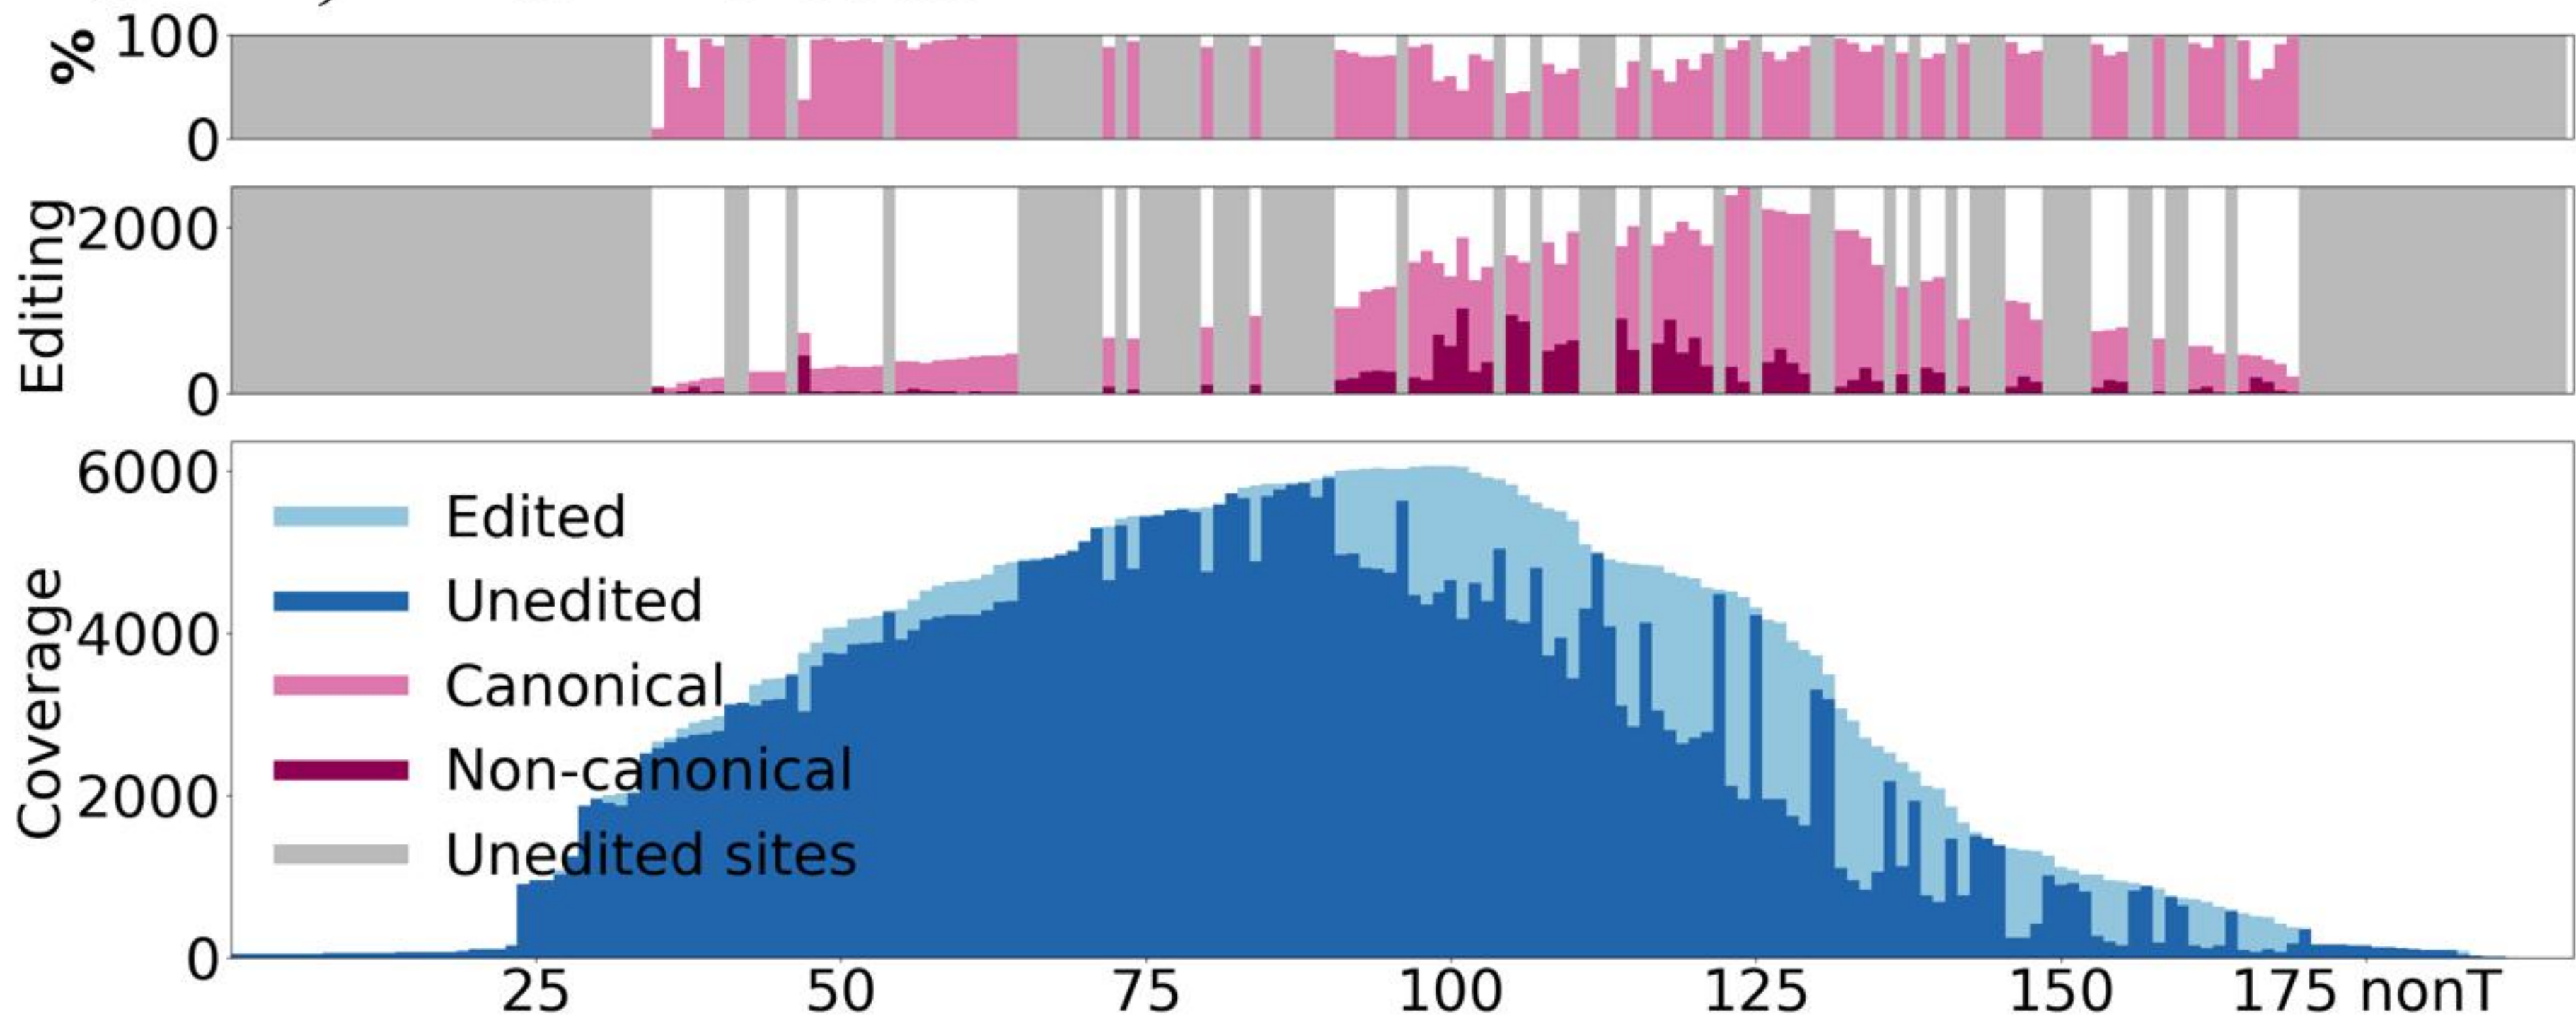

Supplement: Supplemental_Figure_S3.pdf [file Supplemental_Figure_S3.pdf]
