# Supplementary material
Source: HighWire-hosted journal article supplement (doi:10.1101/rna.079088.121)

# CLB, A6 : abrupt vs fed

Figure S4

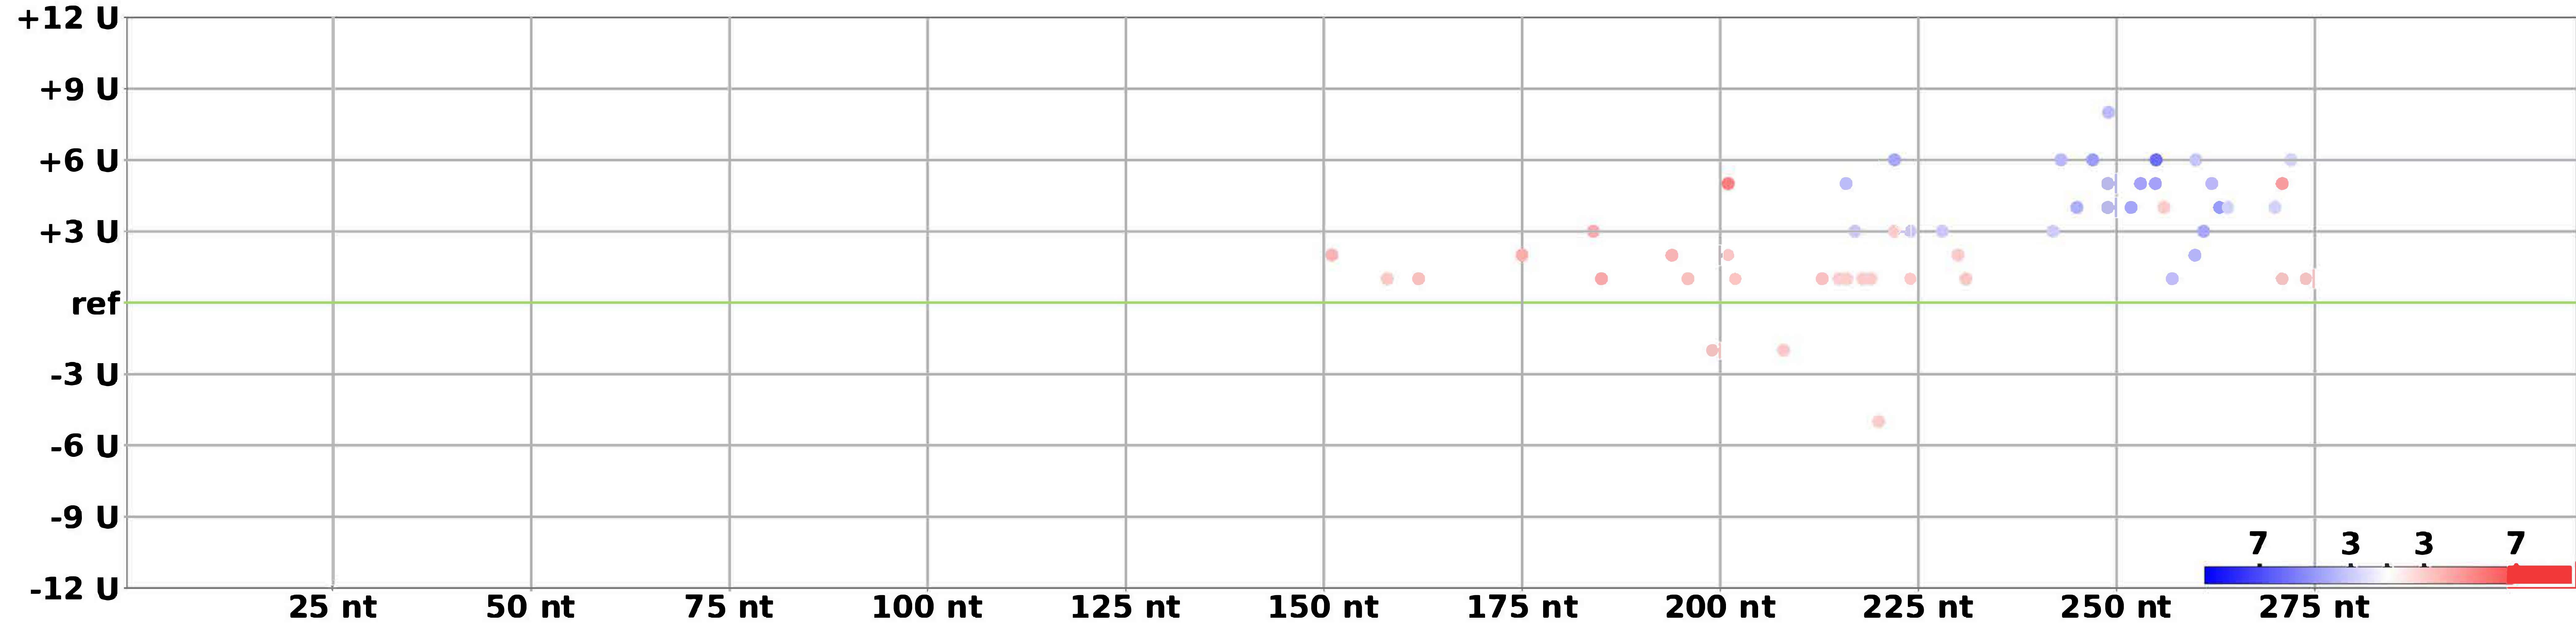

# CLB, A6 : slow vs fed

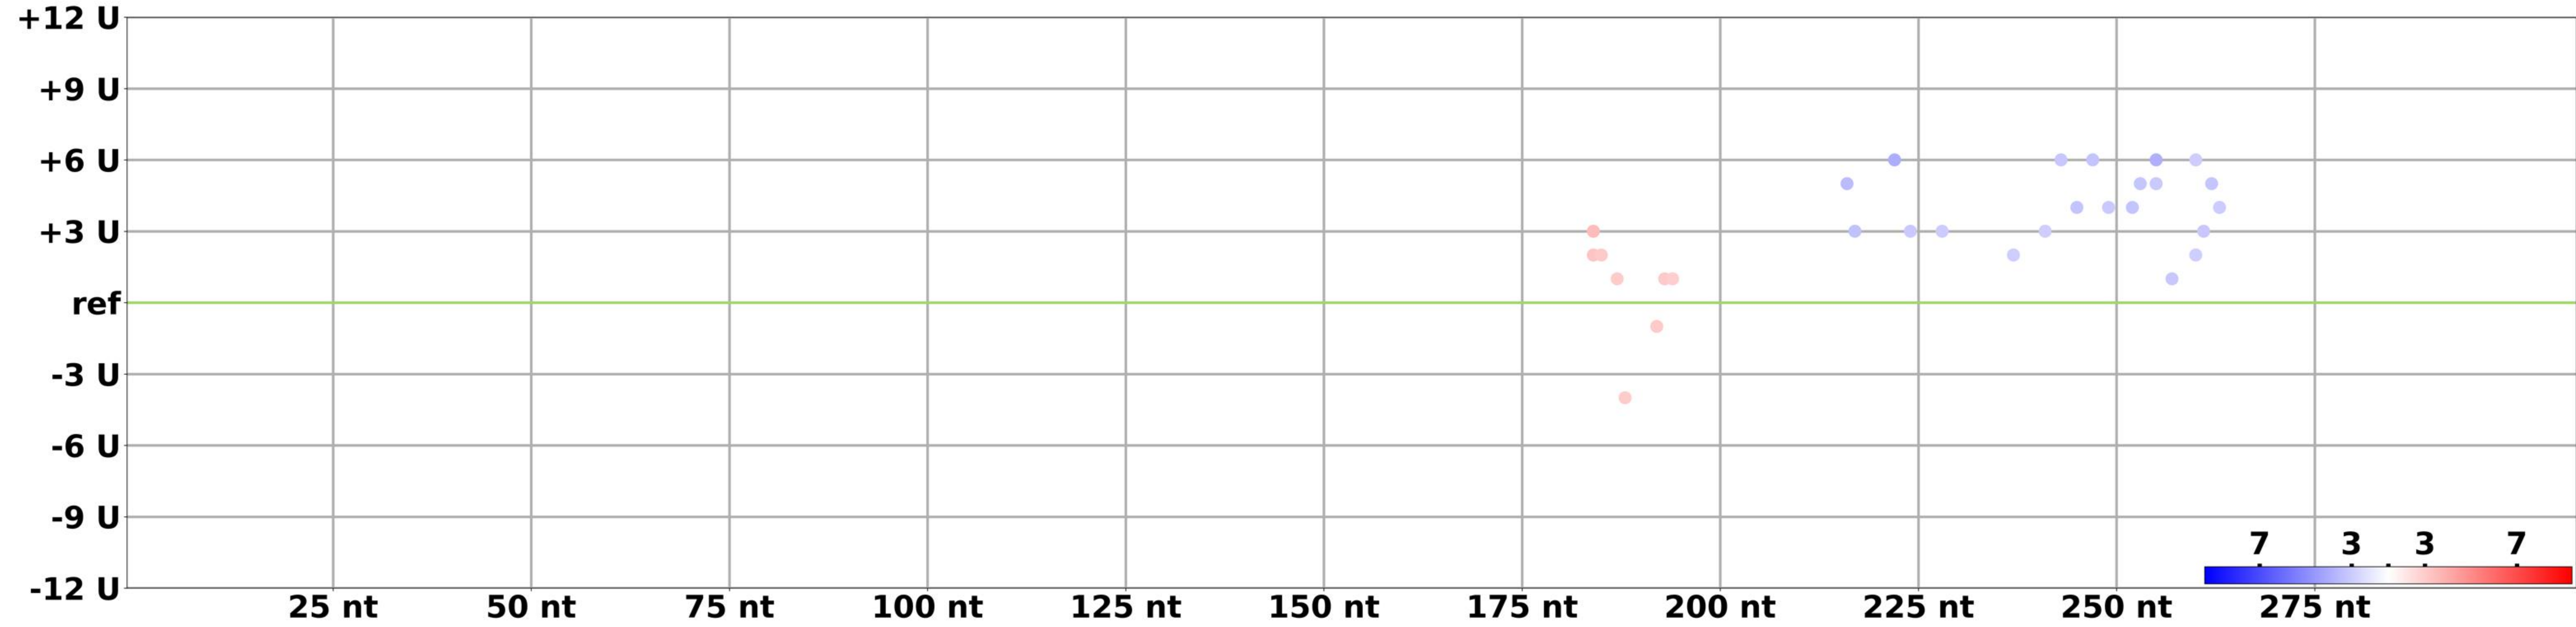

# CLB, CO2 : abrupt vs fed

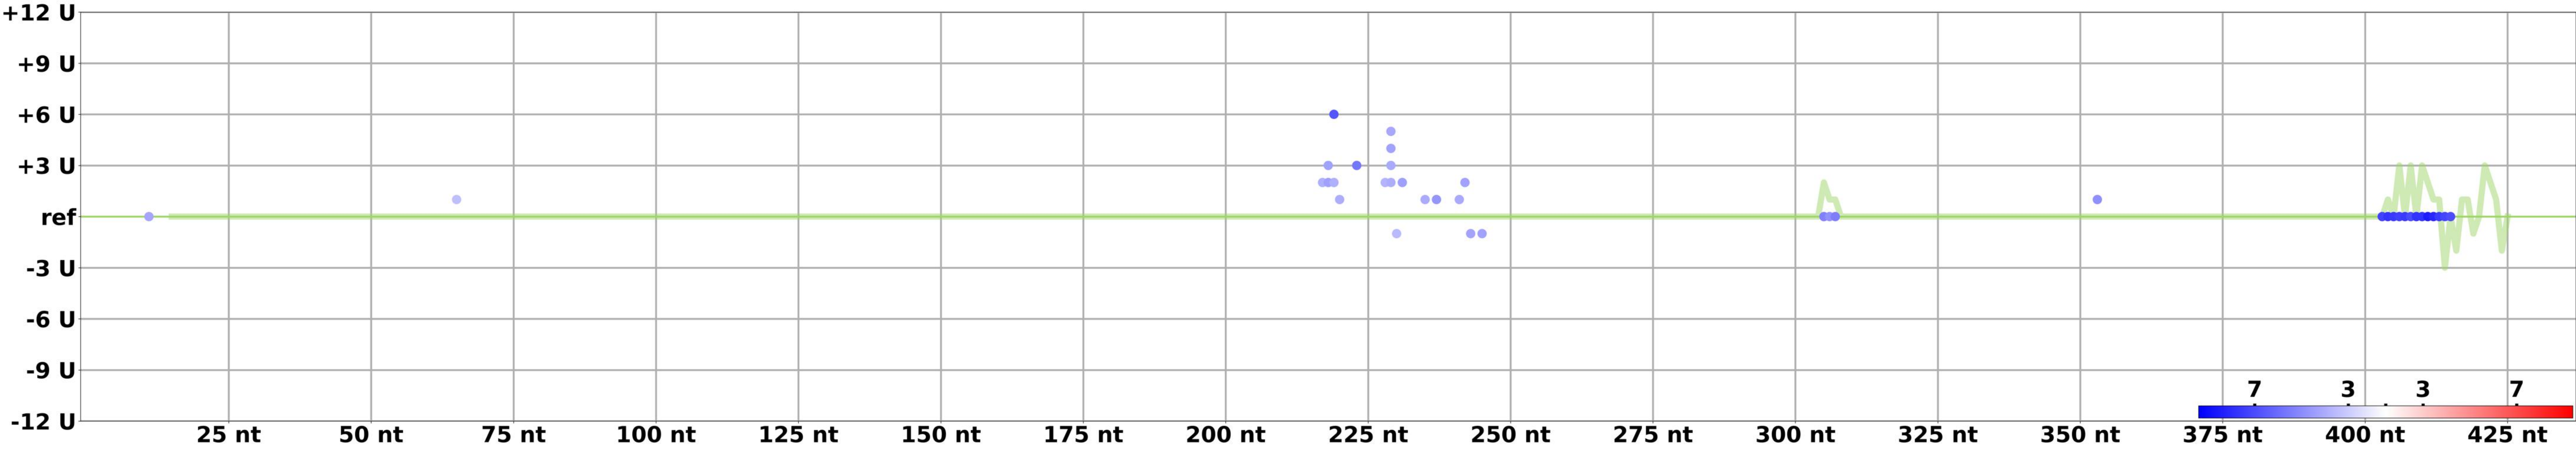

# CLB, CO2 : slow vs fed

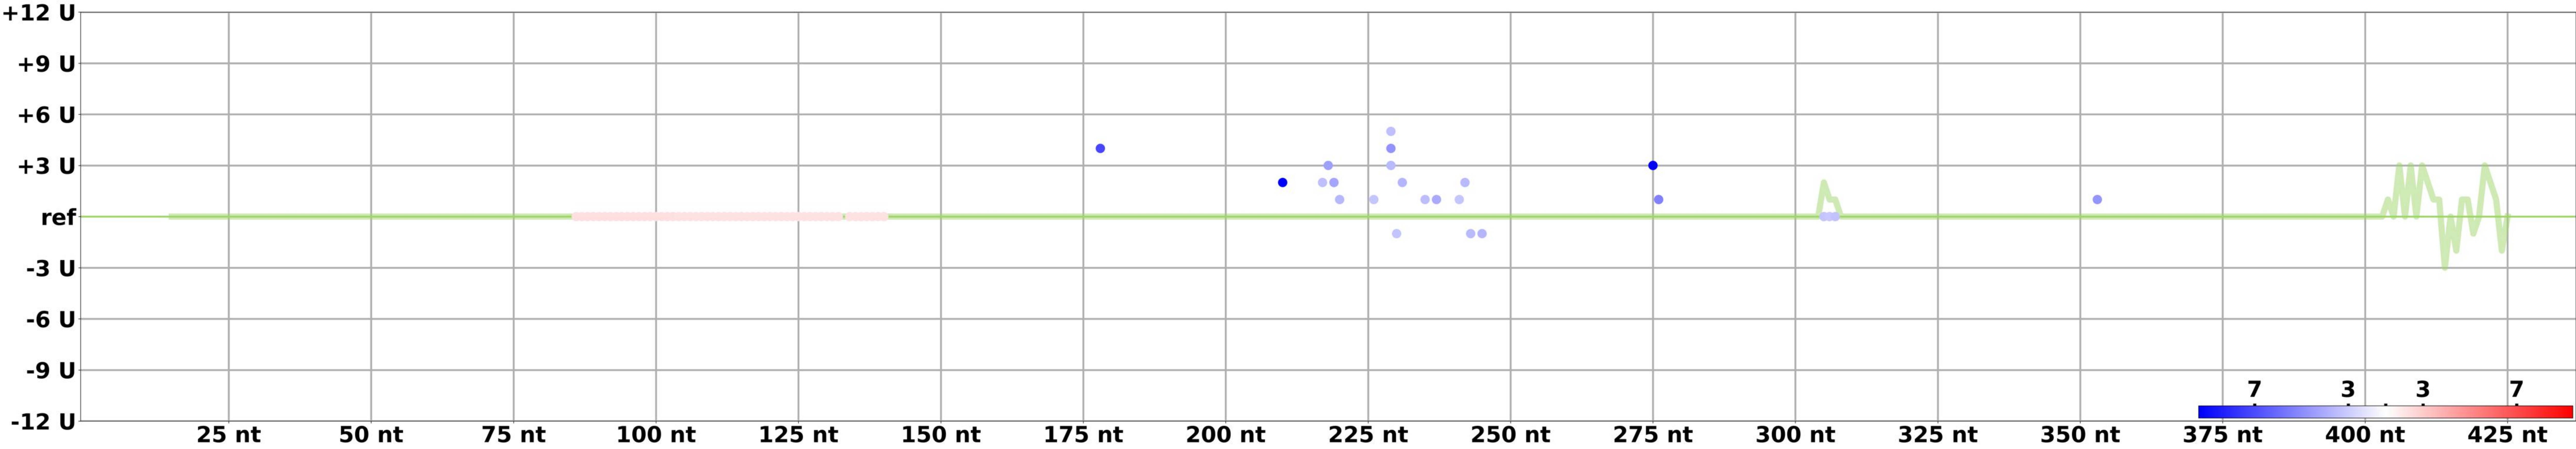

# CLB, CO3 : abrupt vs fed

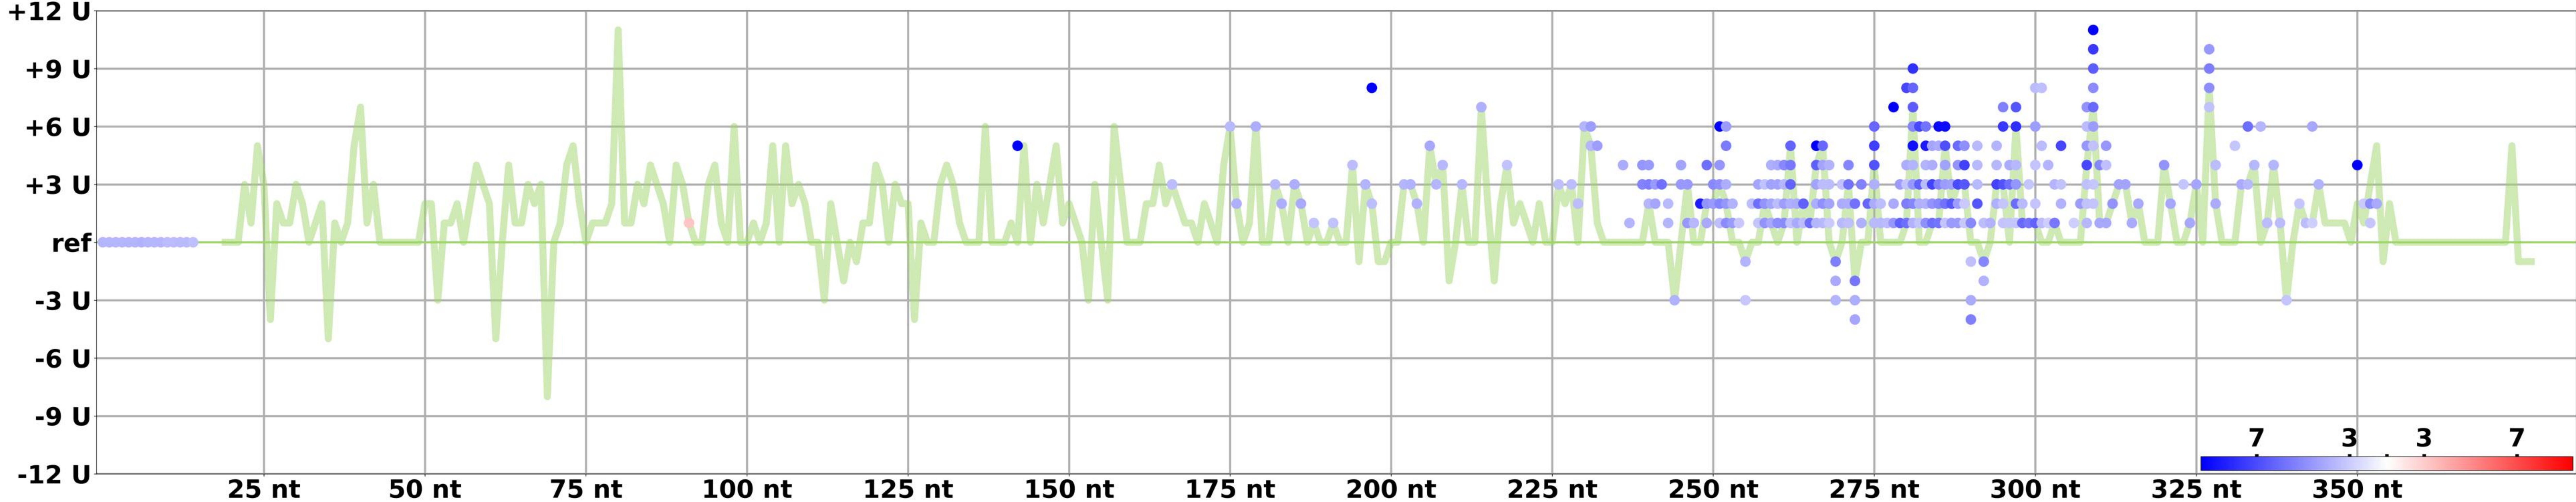

# CLB, CO3 : slow vs fed

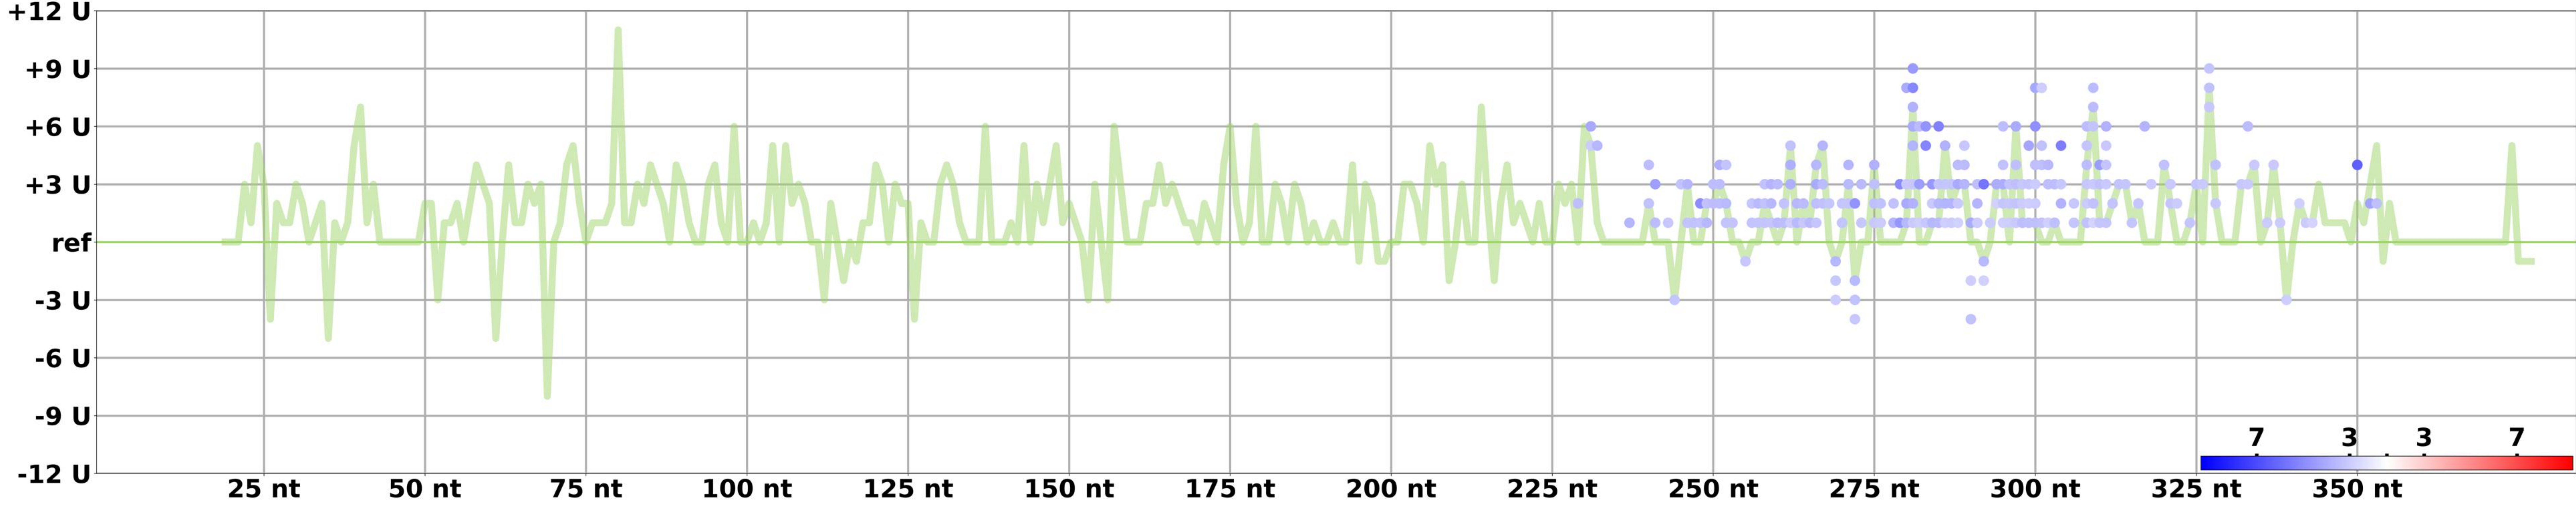

# CLB, CYb : abrupt vs fed

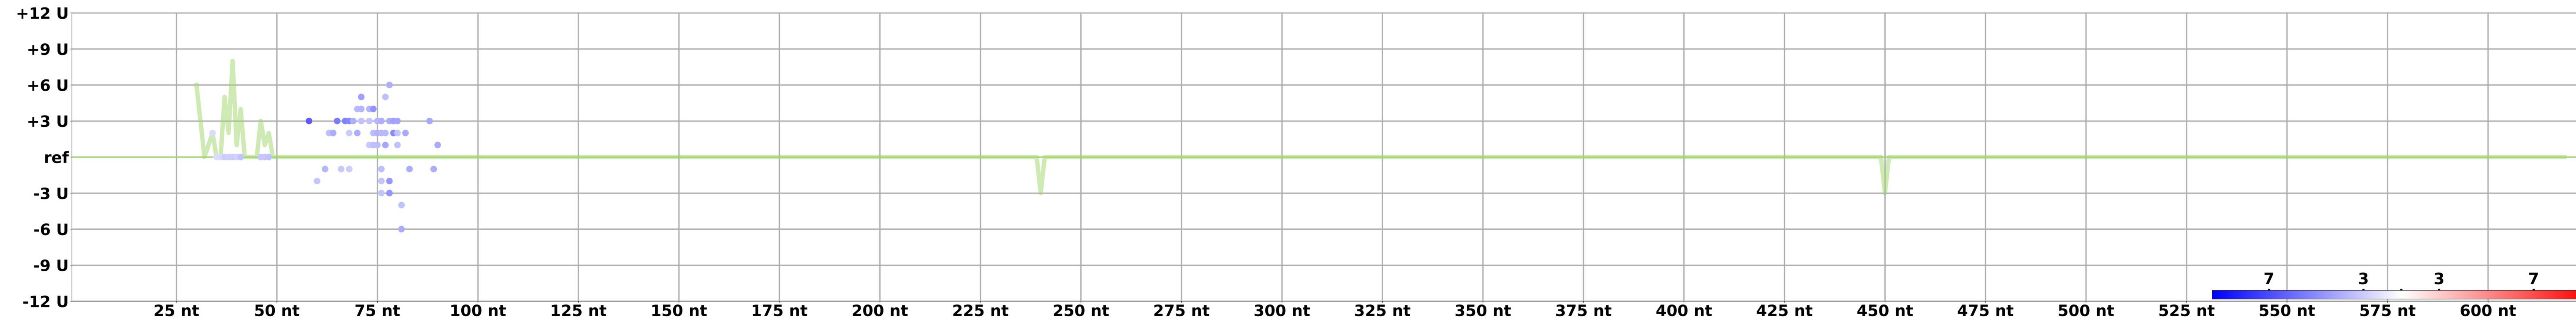

# CLB, CYb : slow vs fed

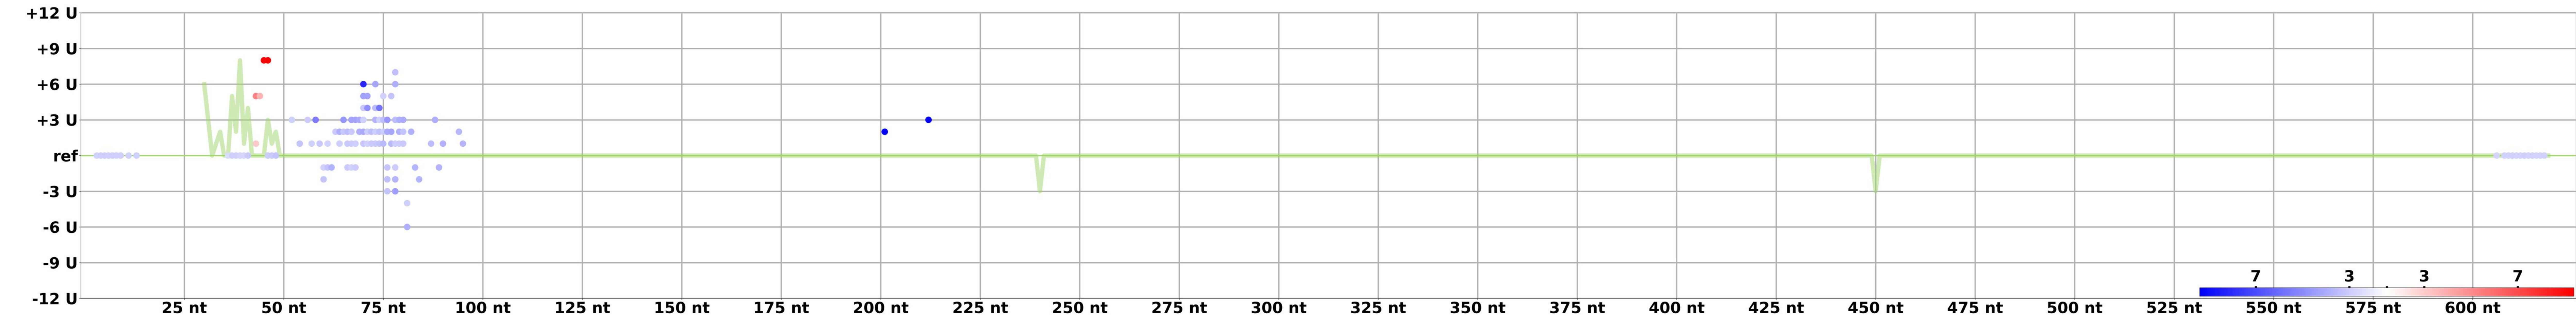

# CLB, MURF2 : abrupt vs fed

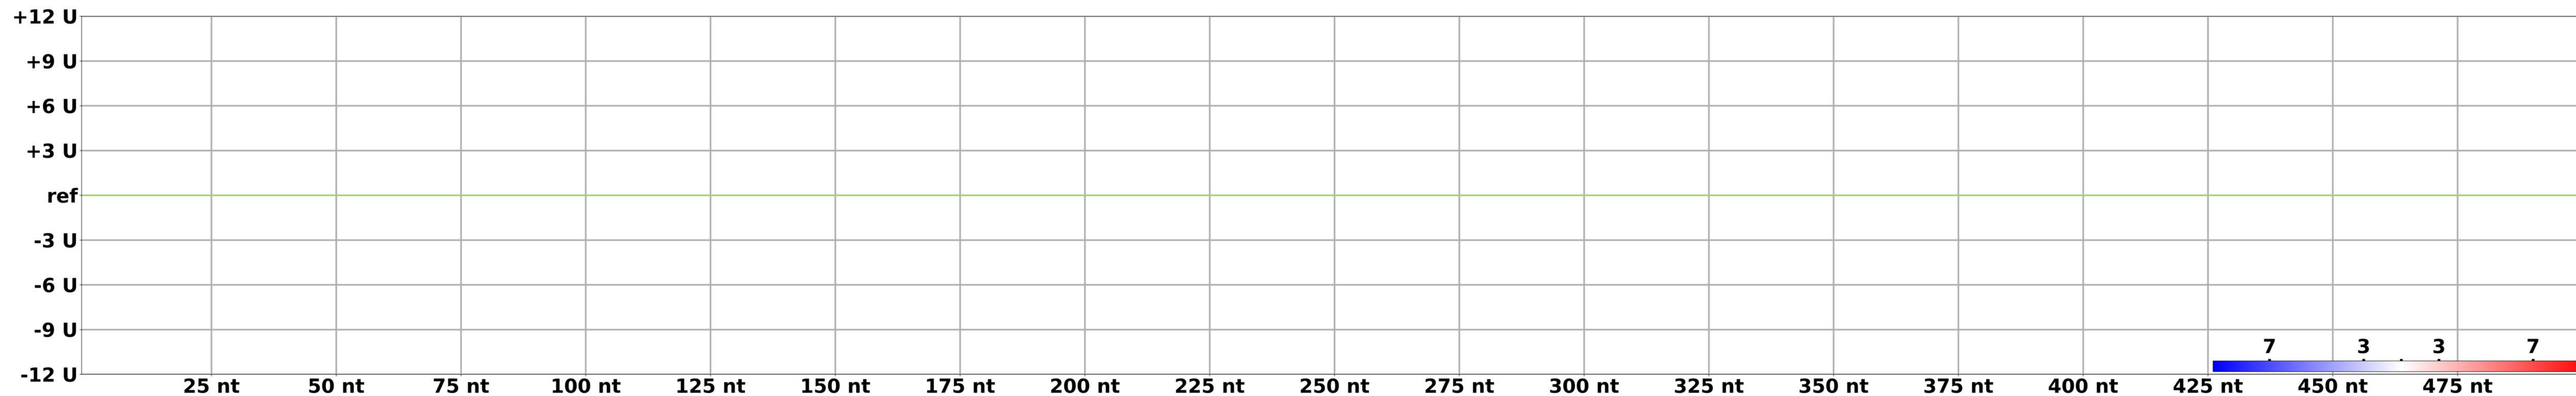

# CLB, MURF2 : slow vs fed

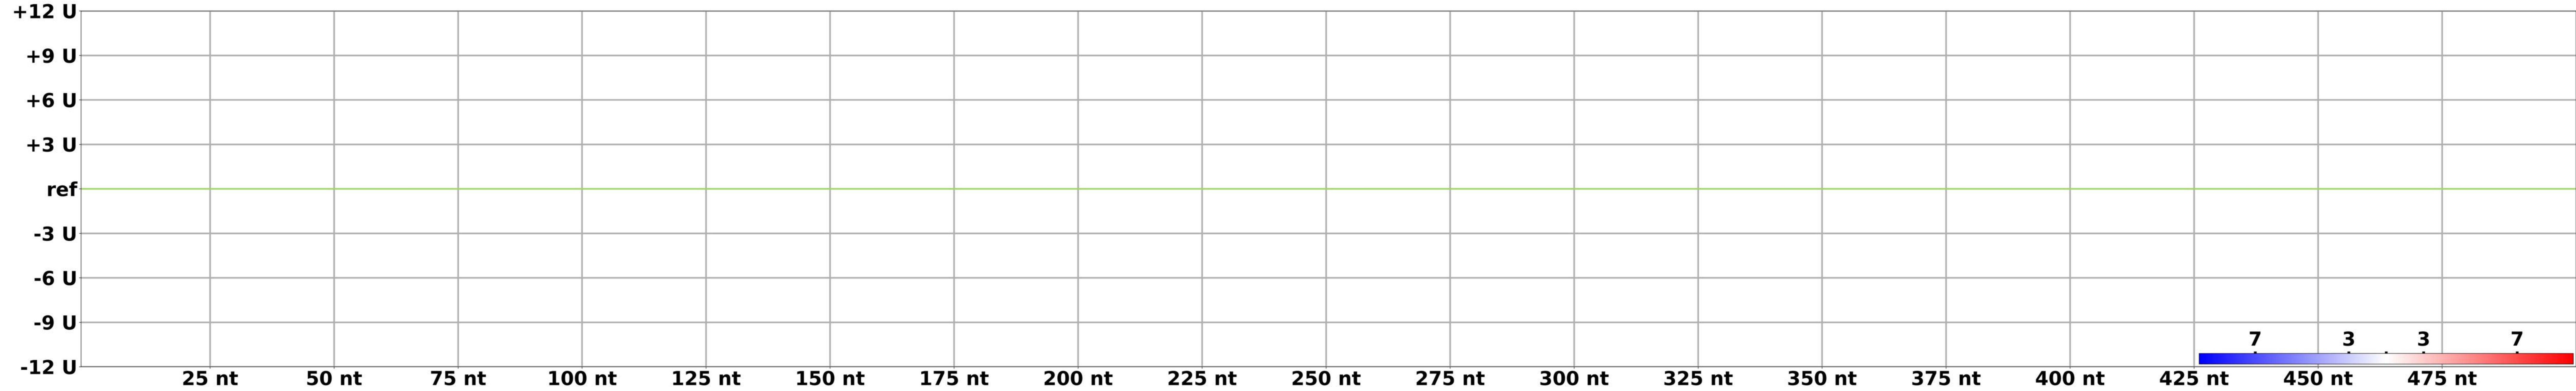

# CLB, ND3 : abrupt vs fed

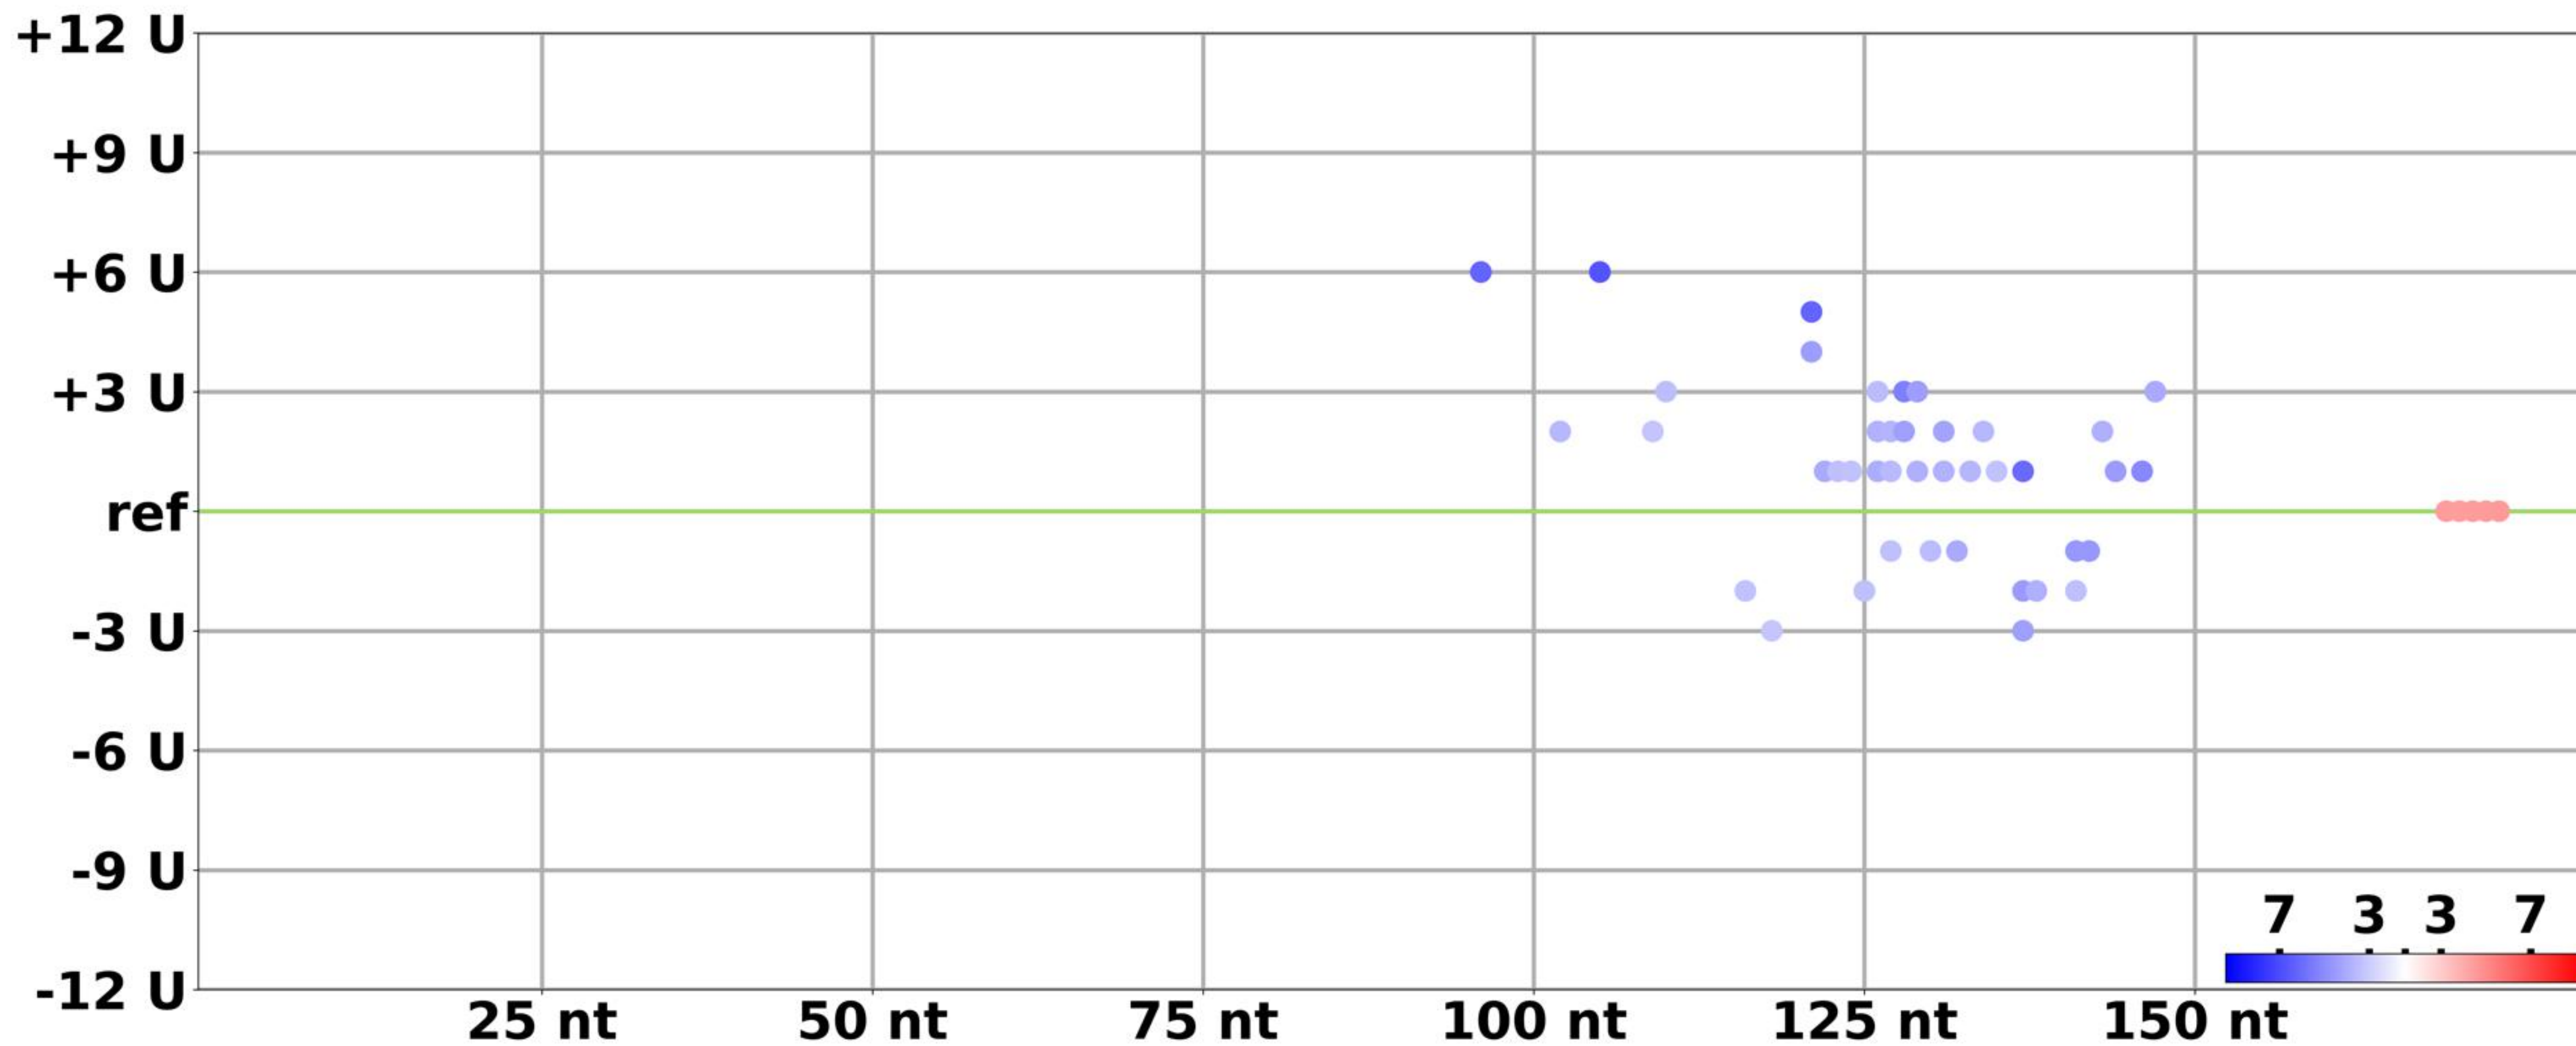

# CLB, ND3 : slow vs fed

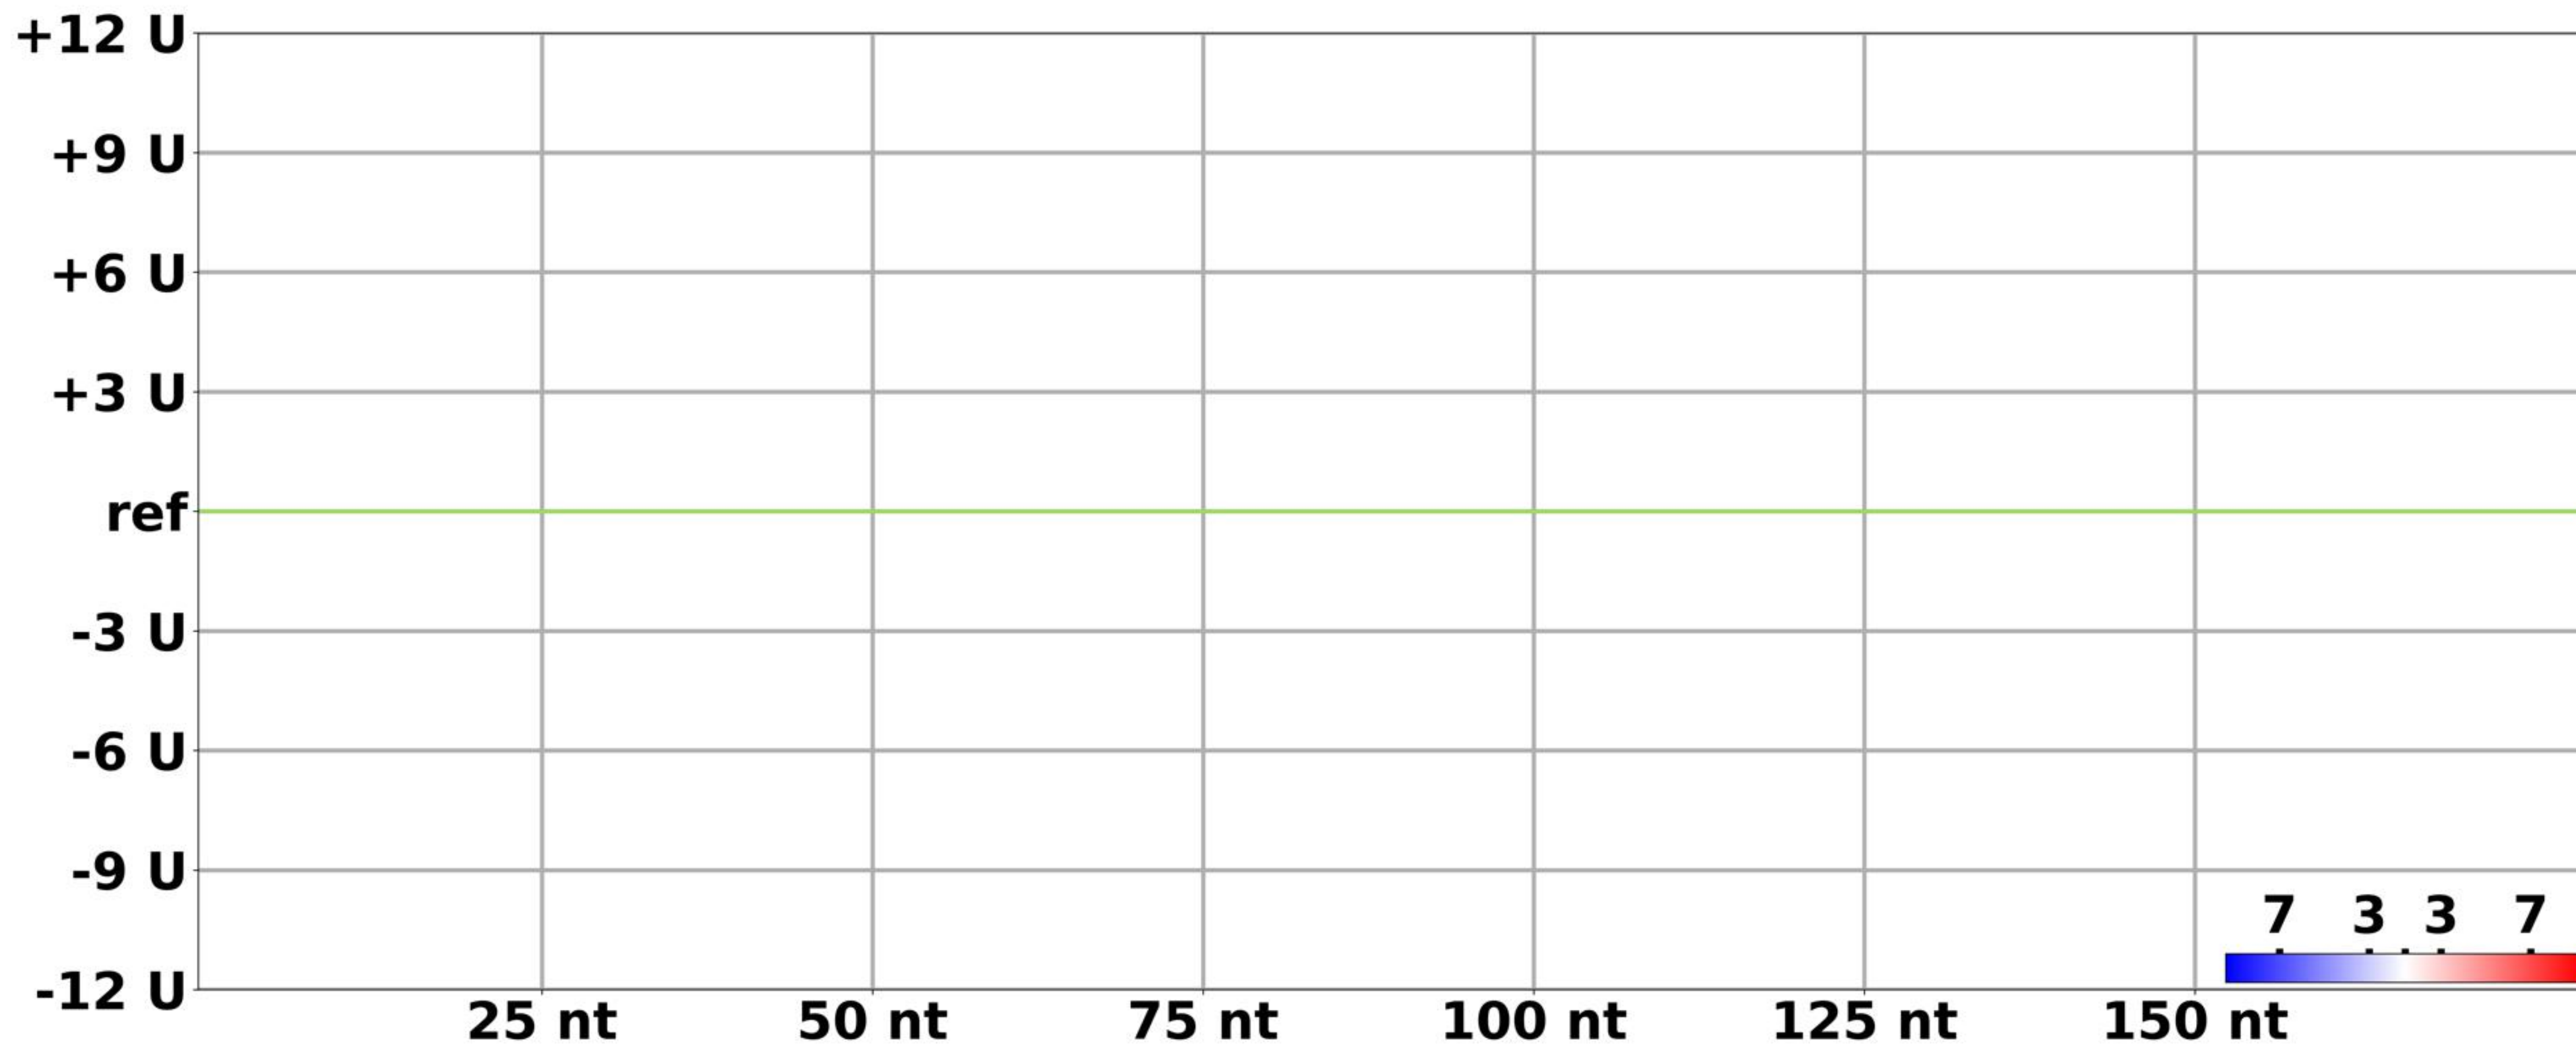

# CLB, ND7 : abrupt vs fed

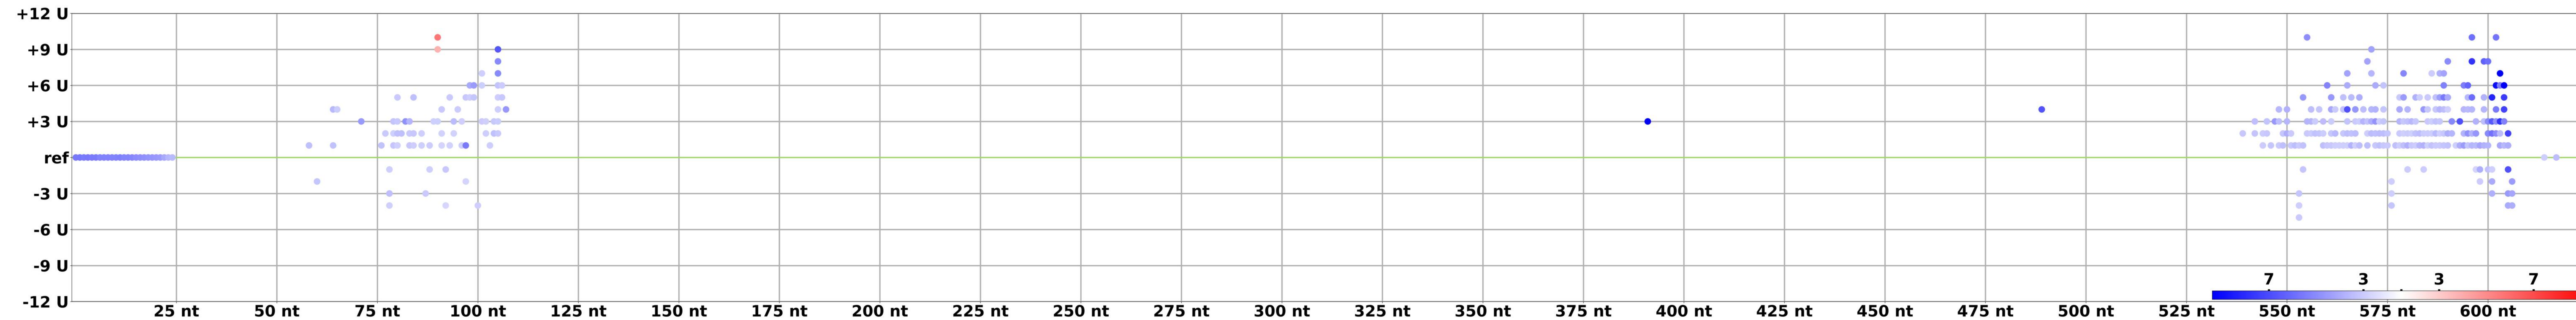

# CLB, ND7 : slow vs fed

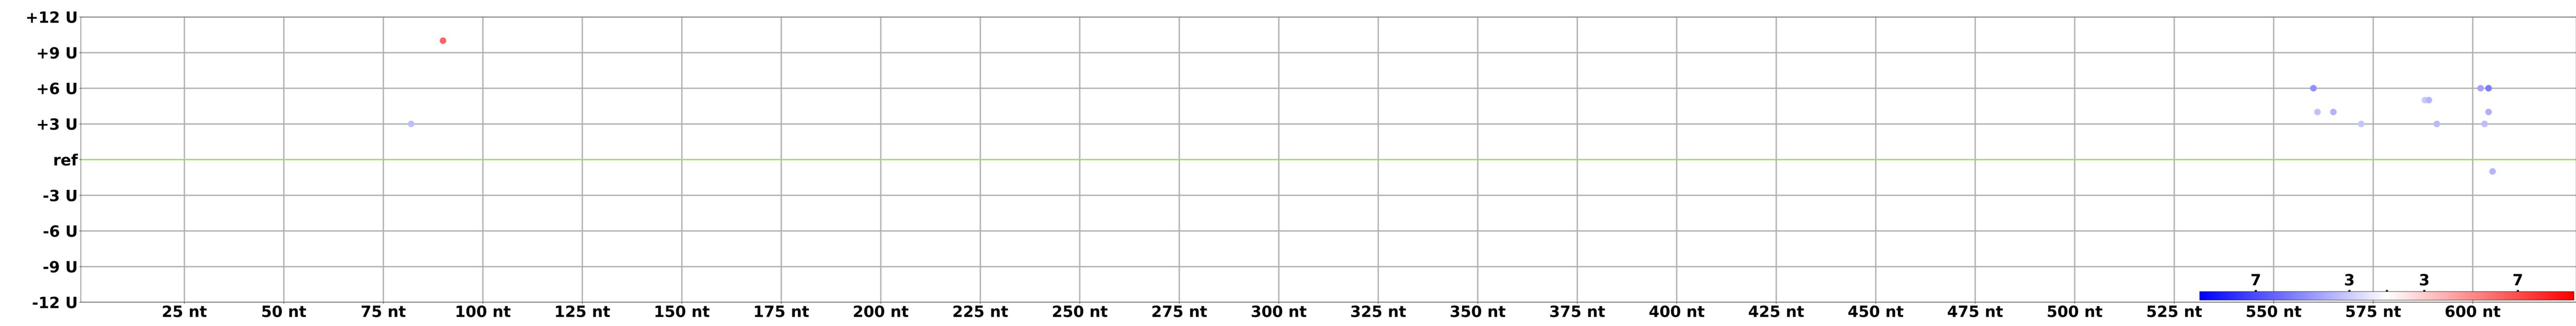

# CLB, ND8 : abrupt vs fed

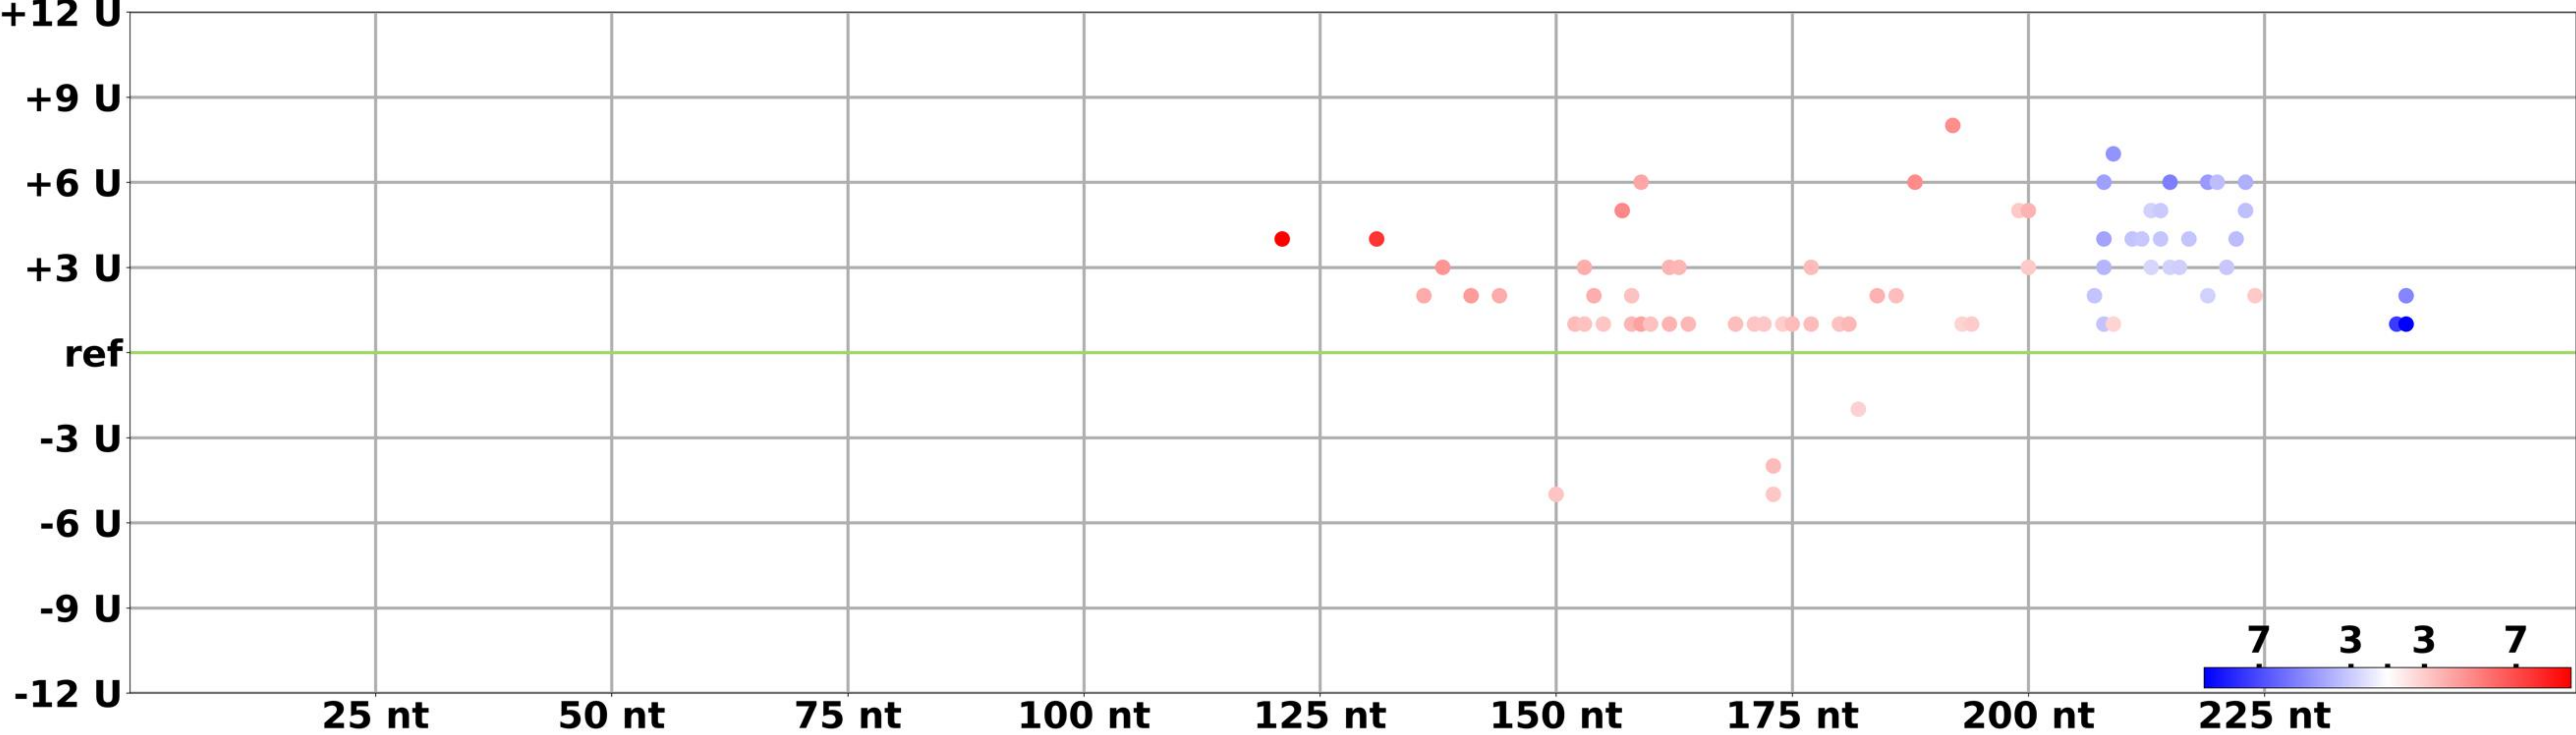

# CLB, ND8 : slow vs fed

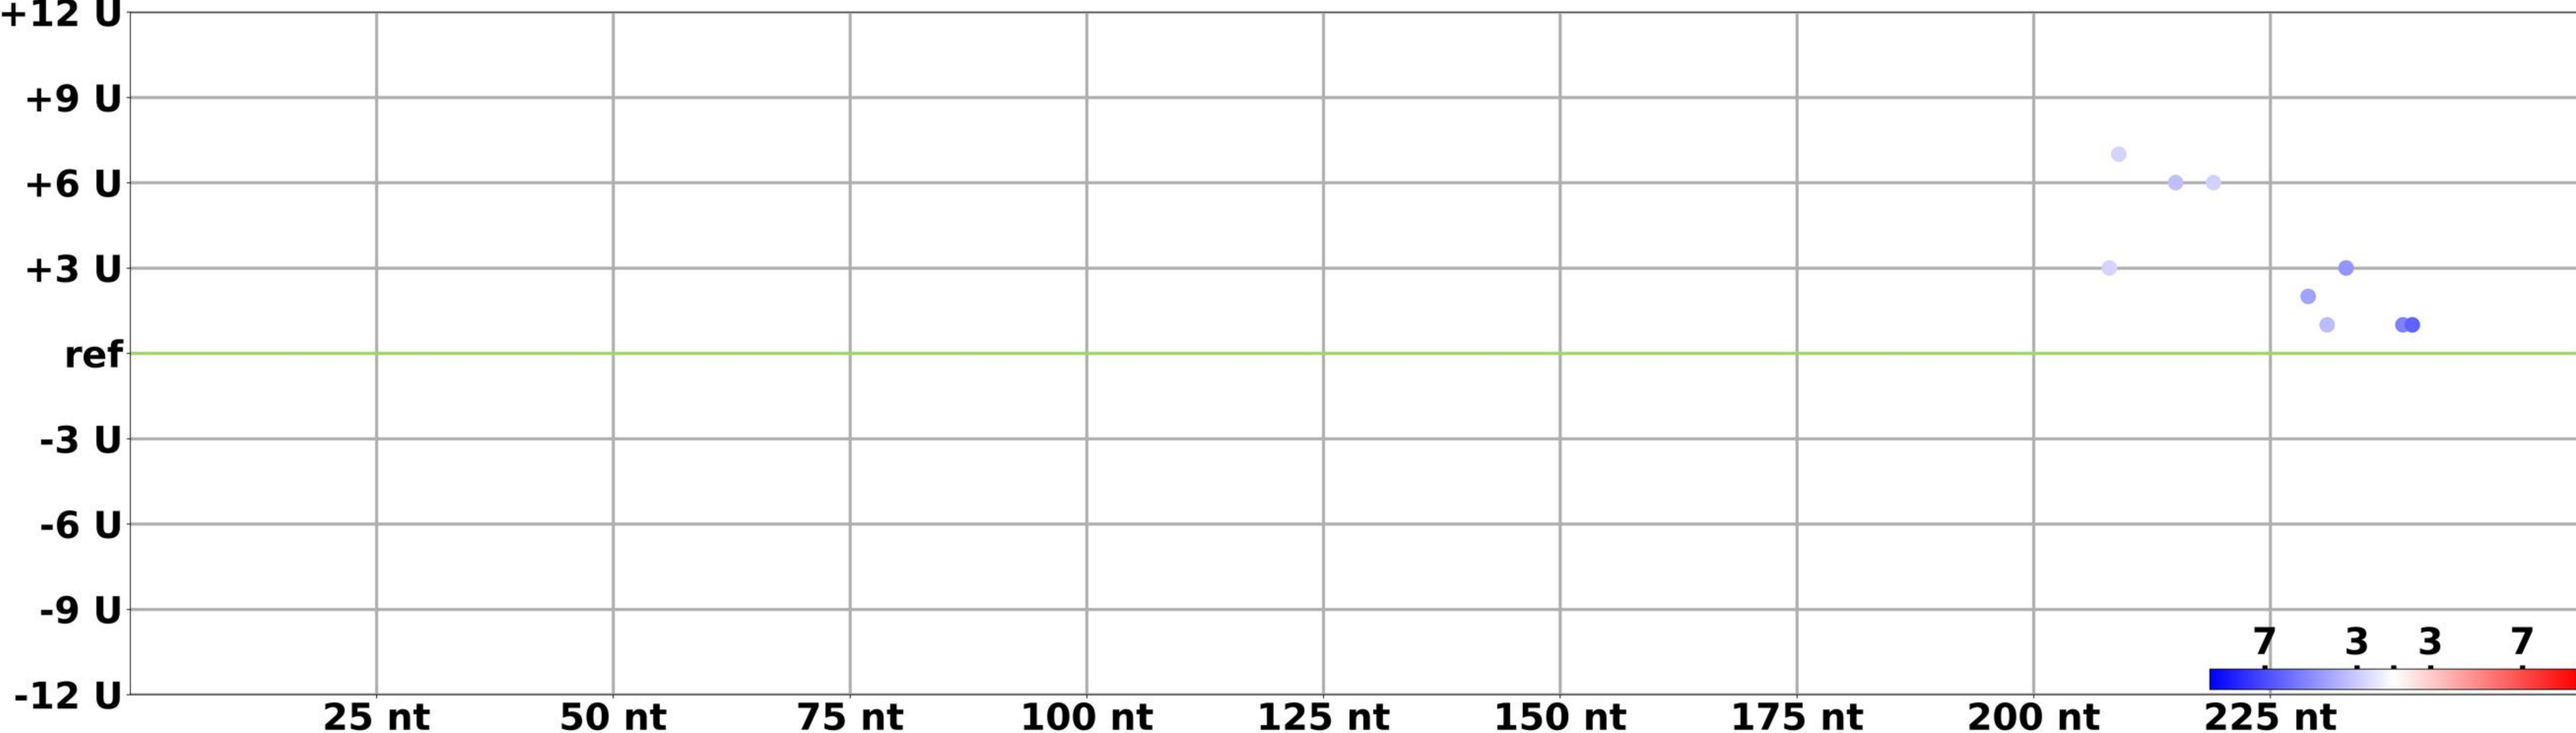

# CLB, ND9 : abrupt vs fed

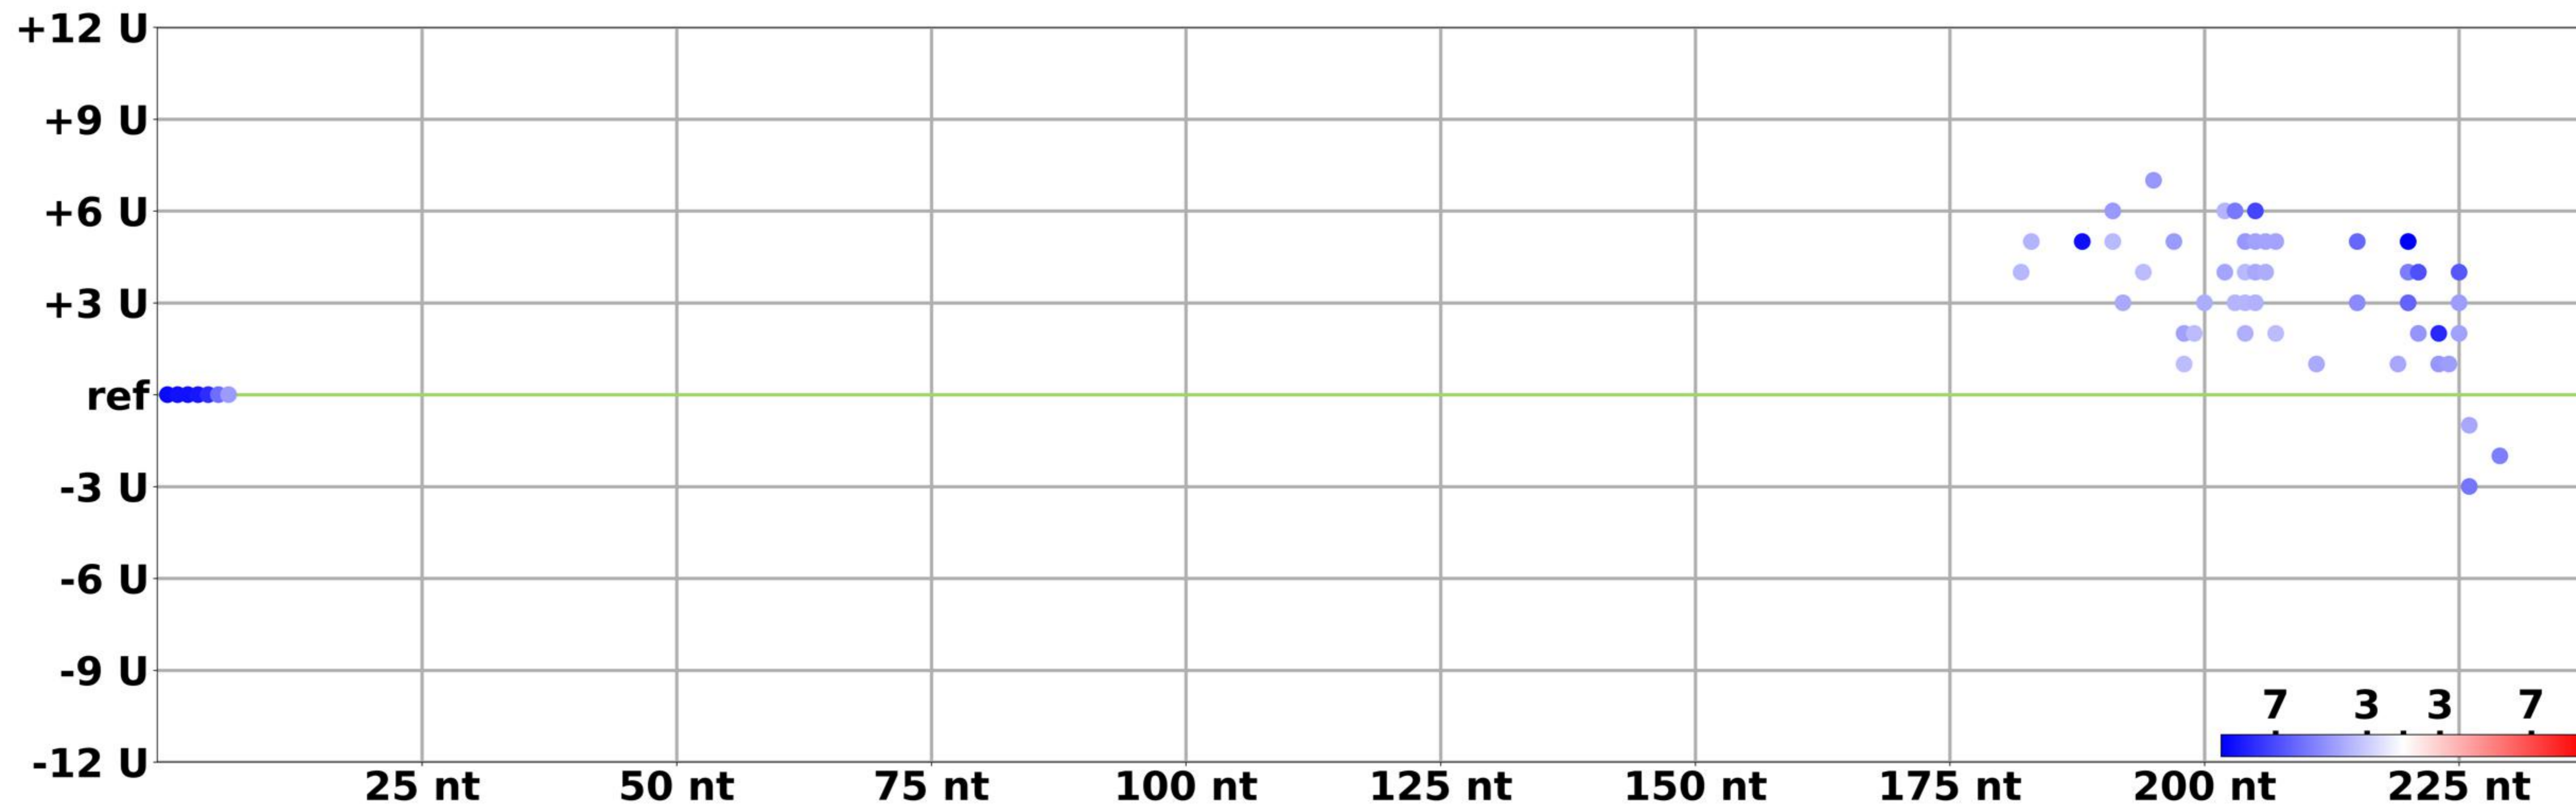

# CLB, ND9 : slow vs fed

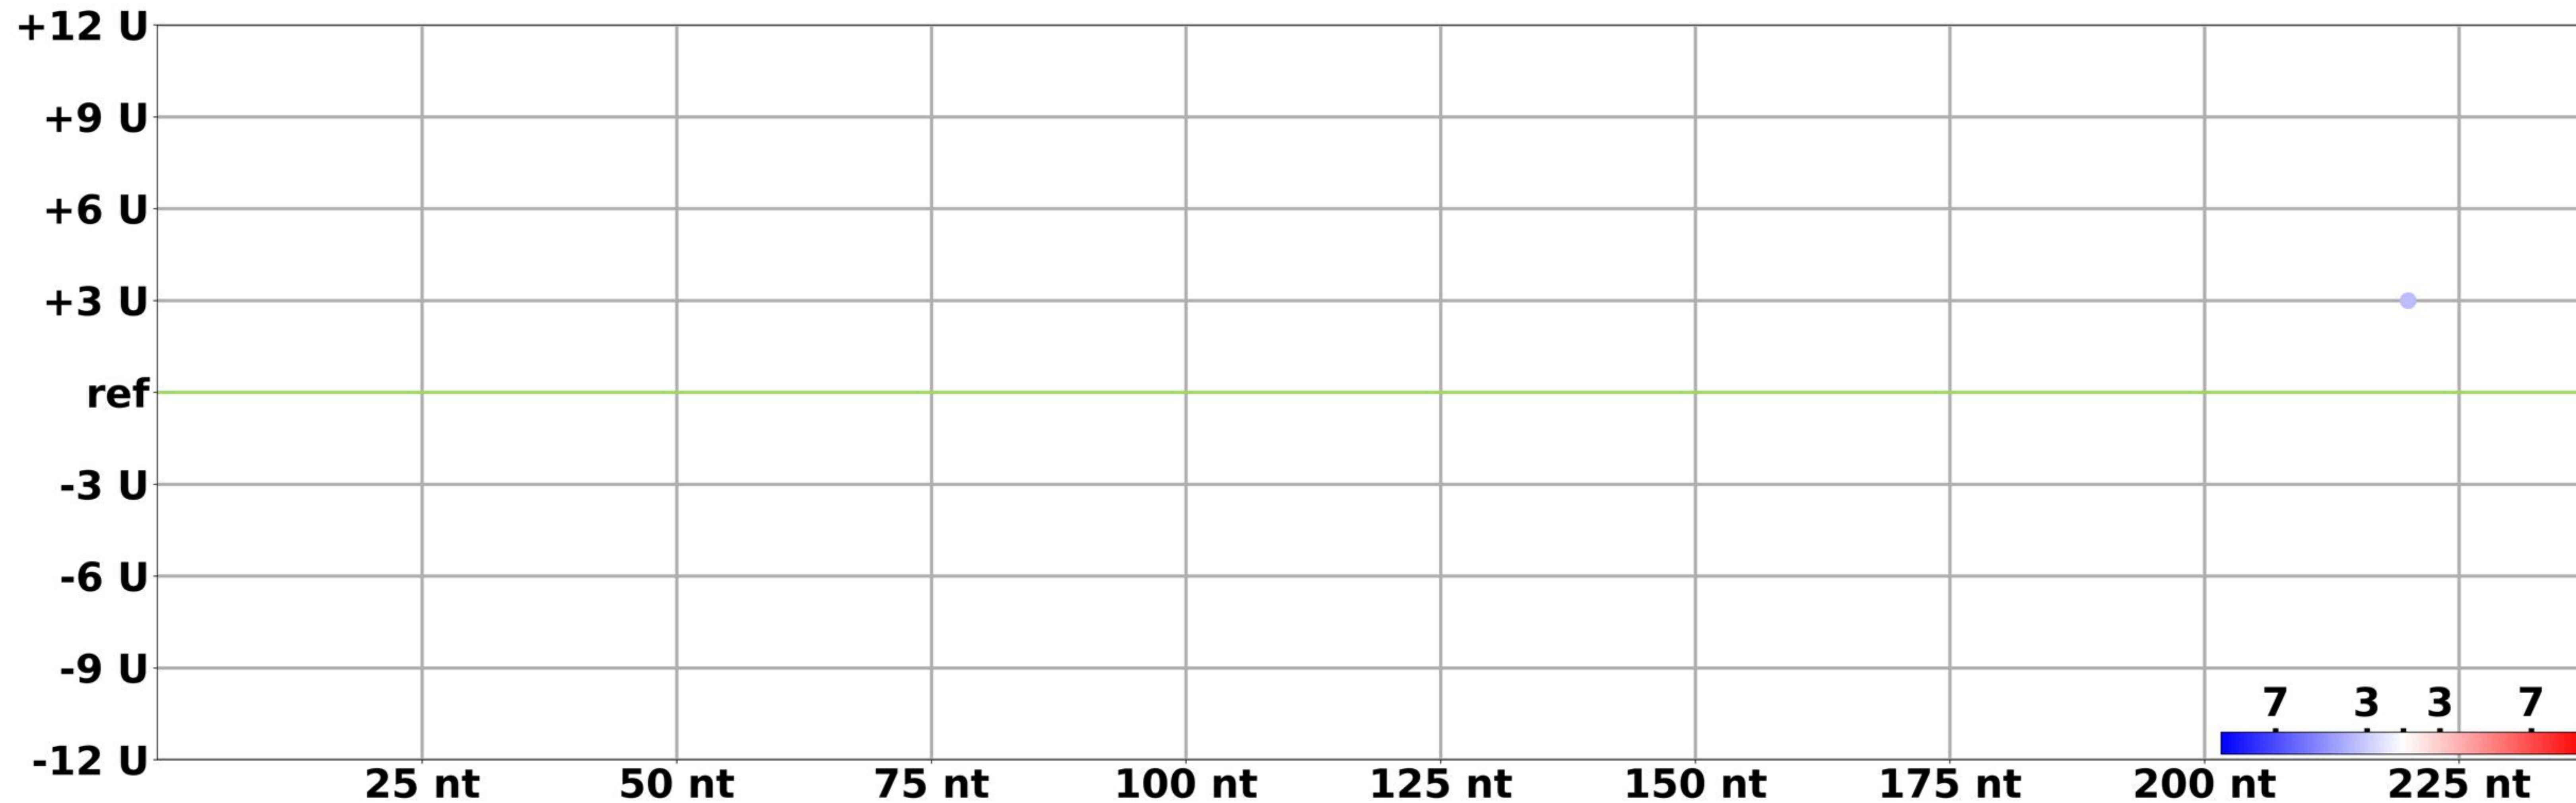

# CLB, RPS12 : abrupt vs fed

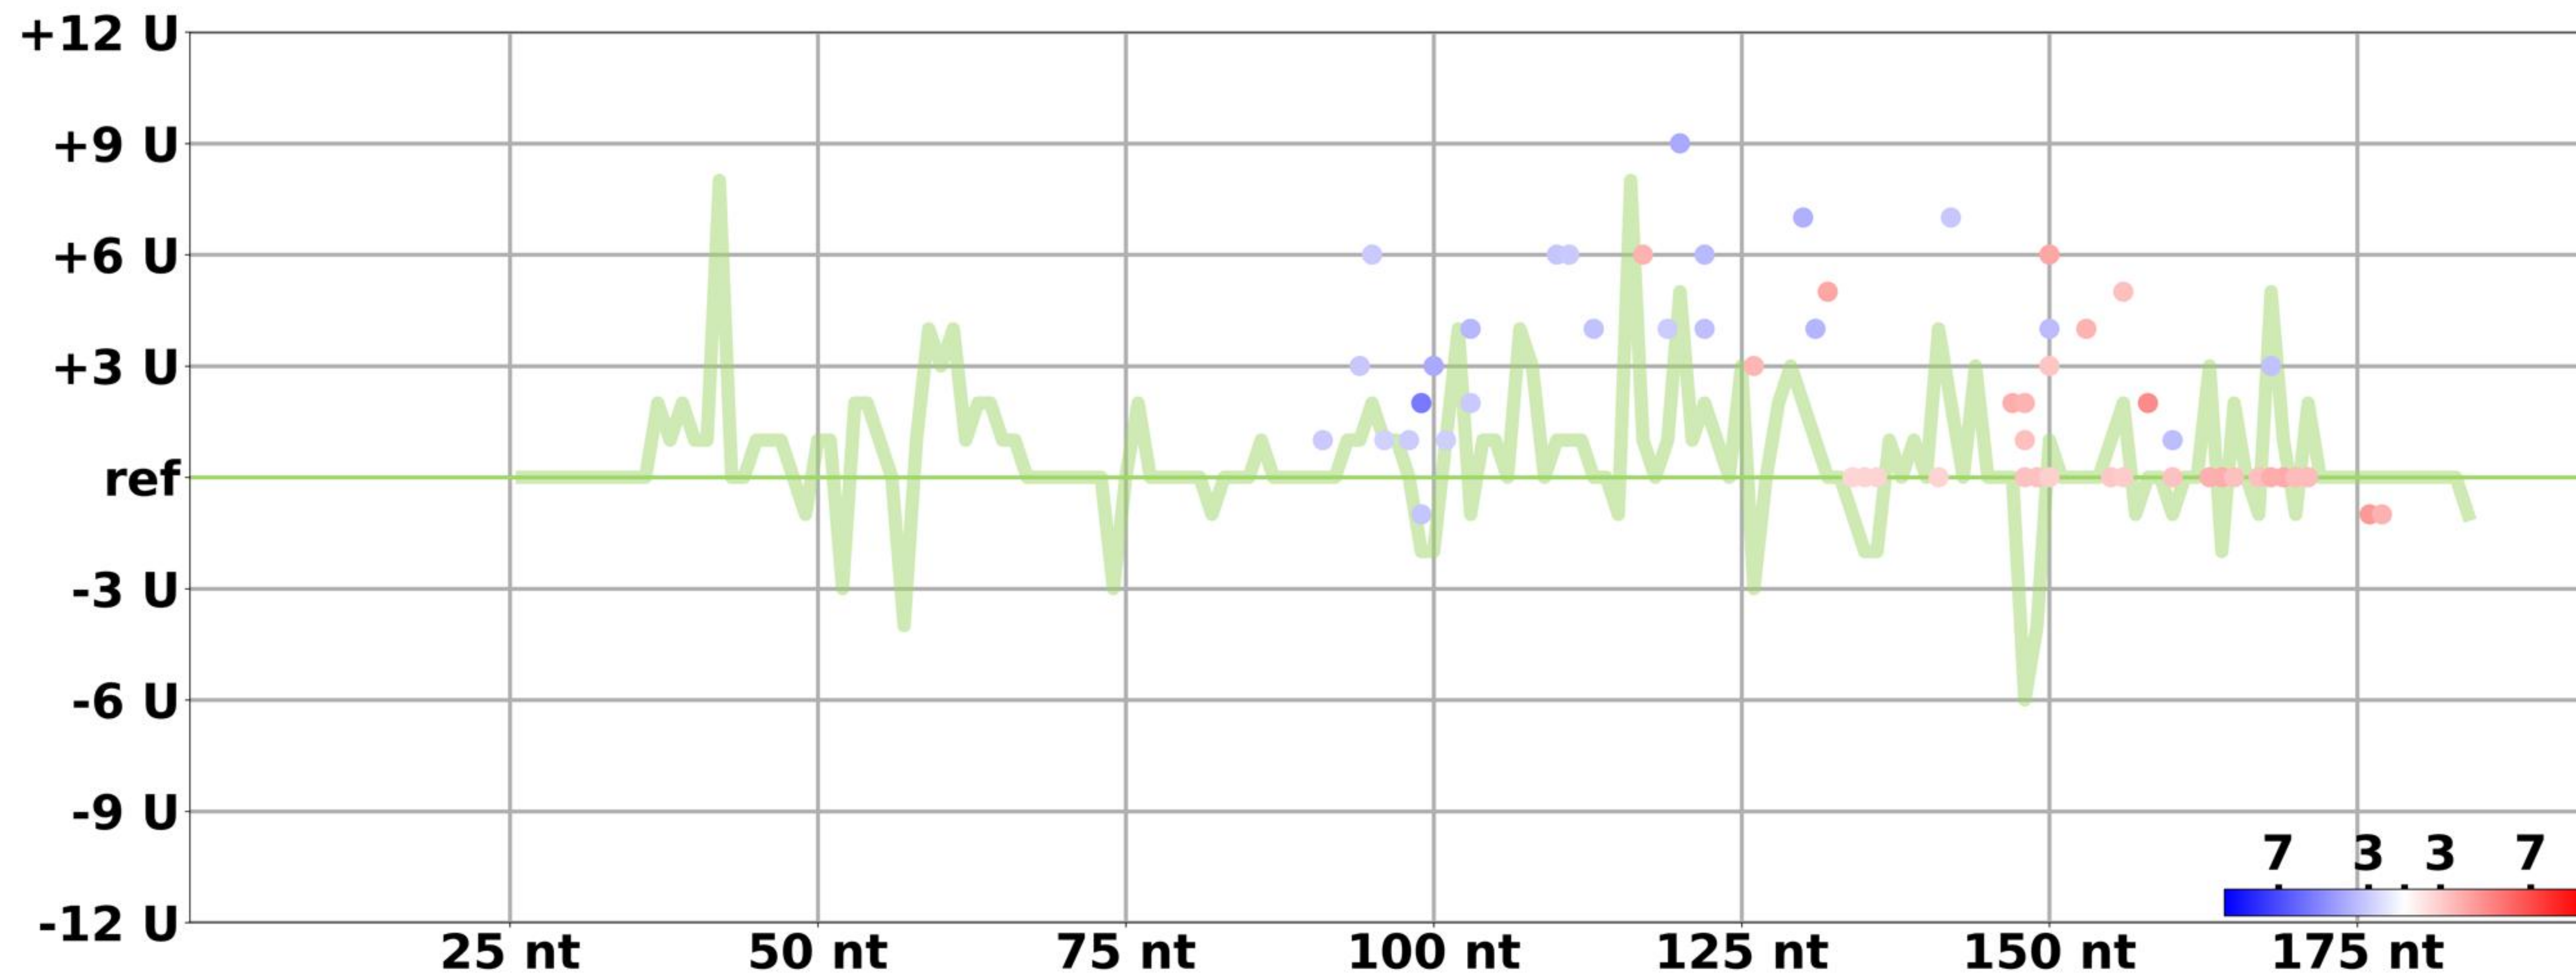

# CLB, RPS12 : slow vs fed

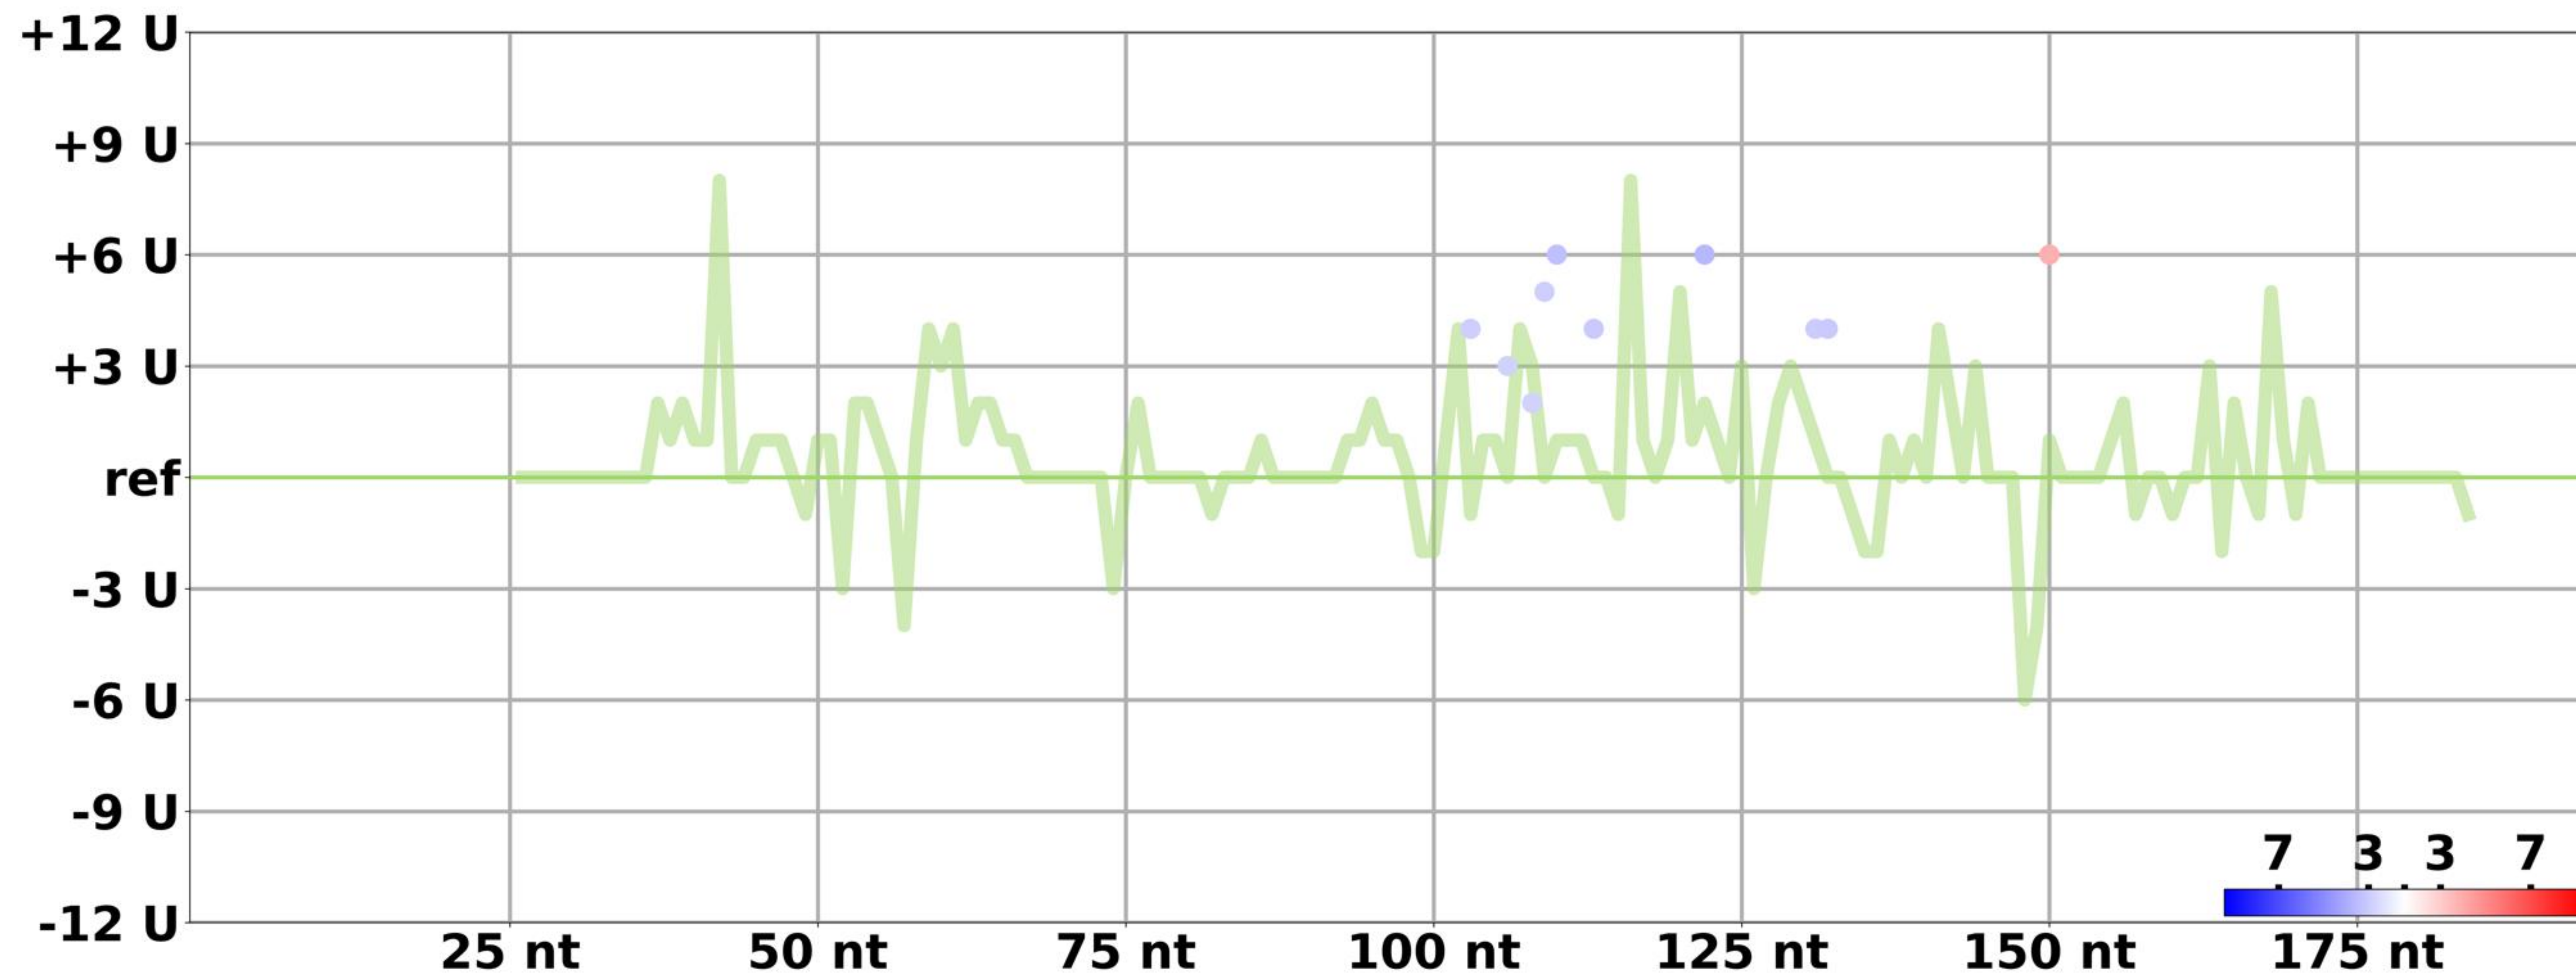

# Syl, A6 : abrupt vs fed

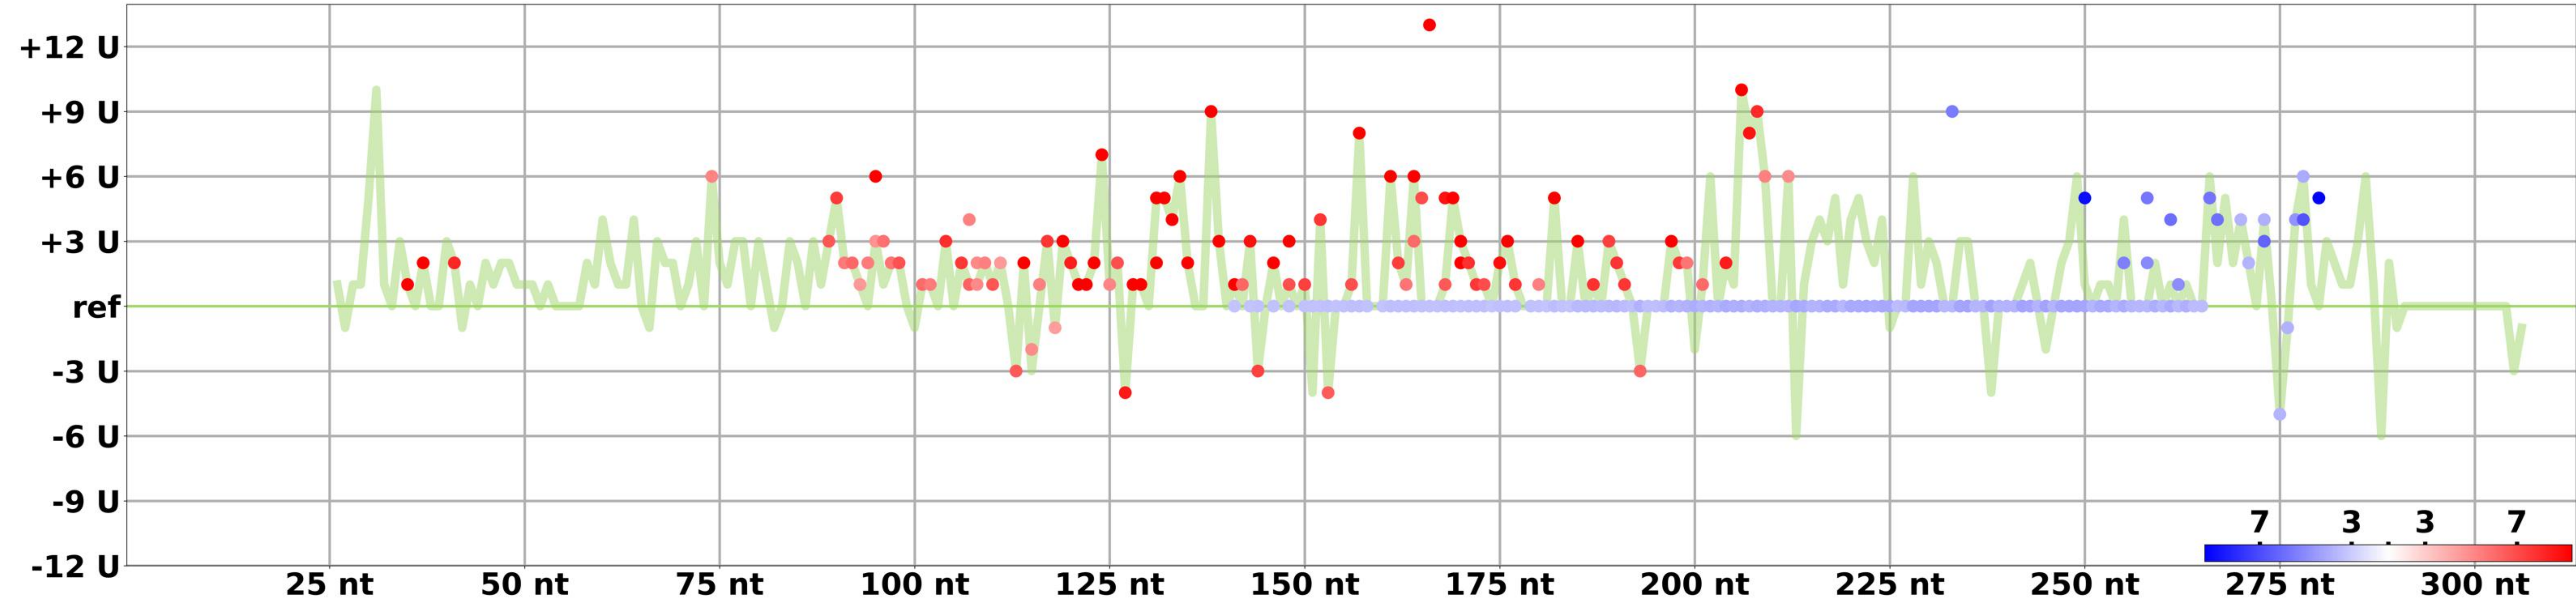

# Syl, A6 : slow vs fed

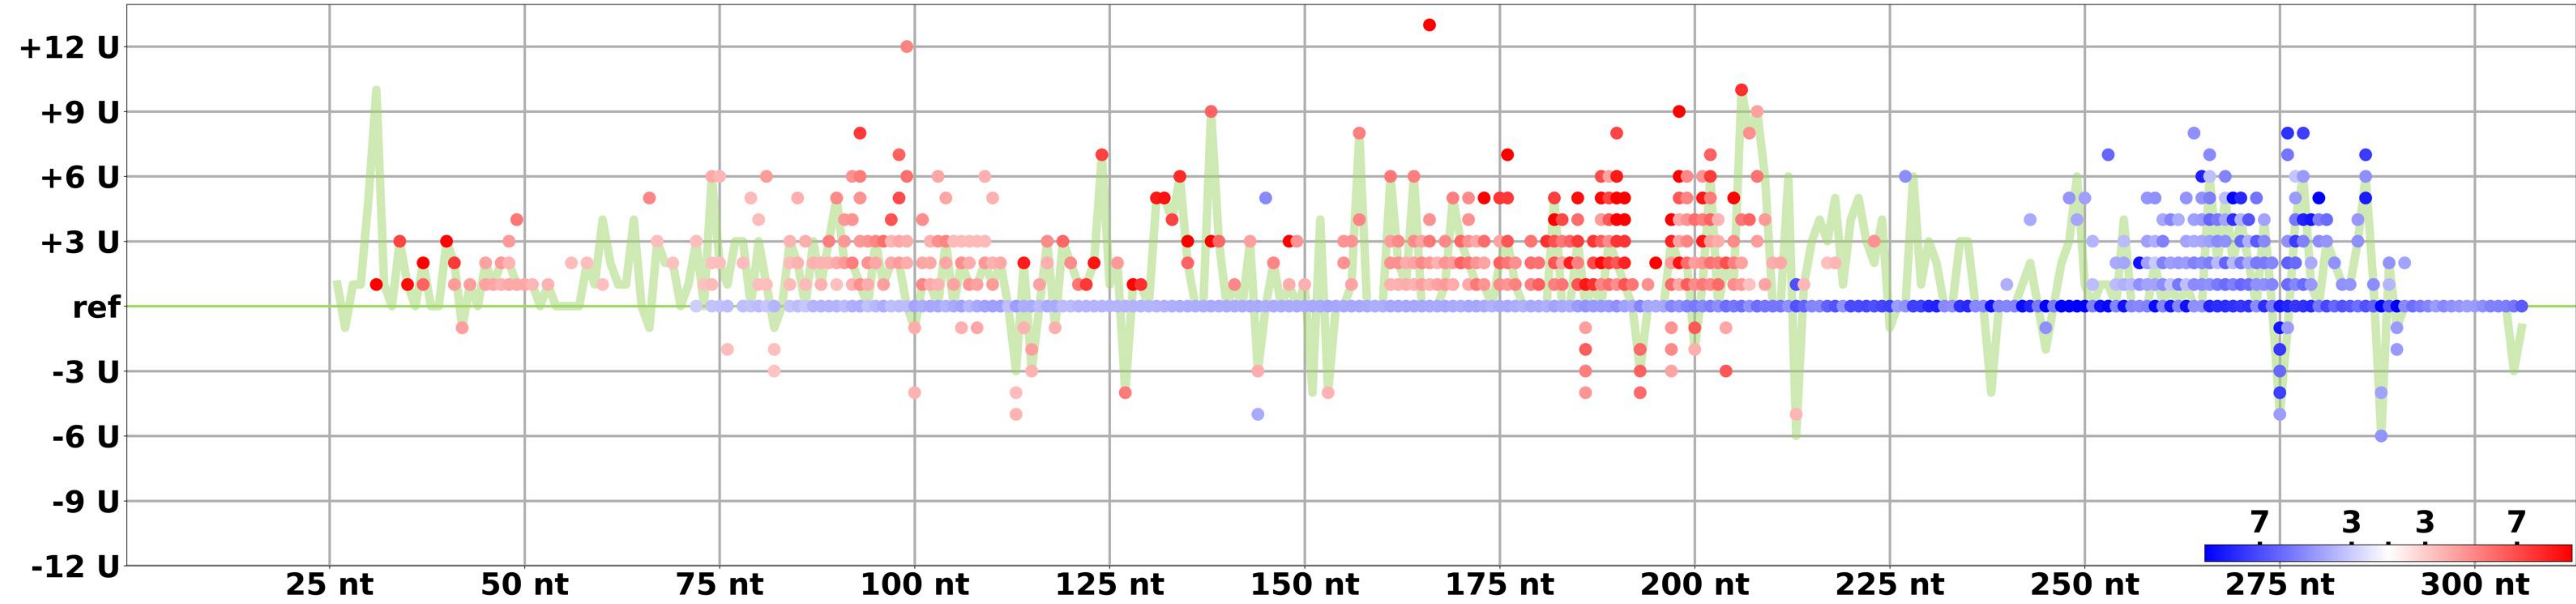

# Syl, CO2 : abrupt vs fed

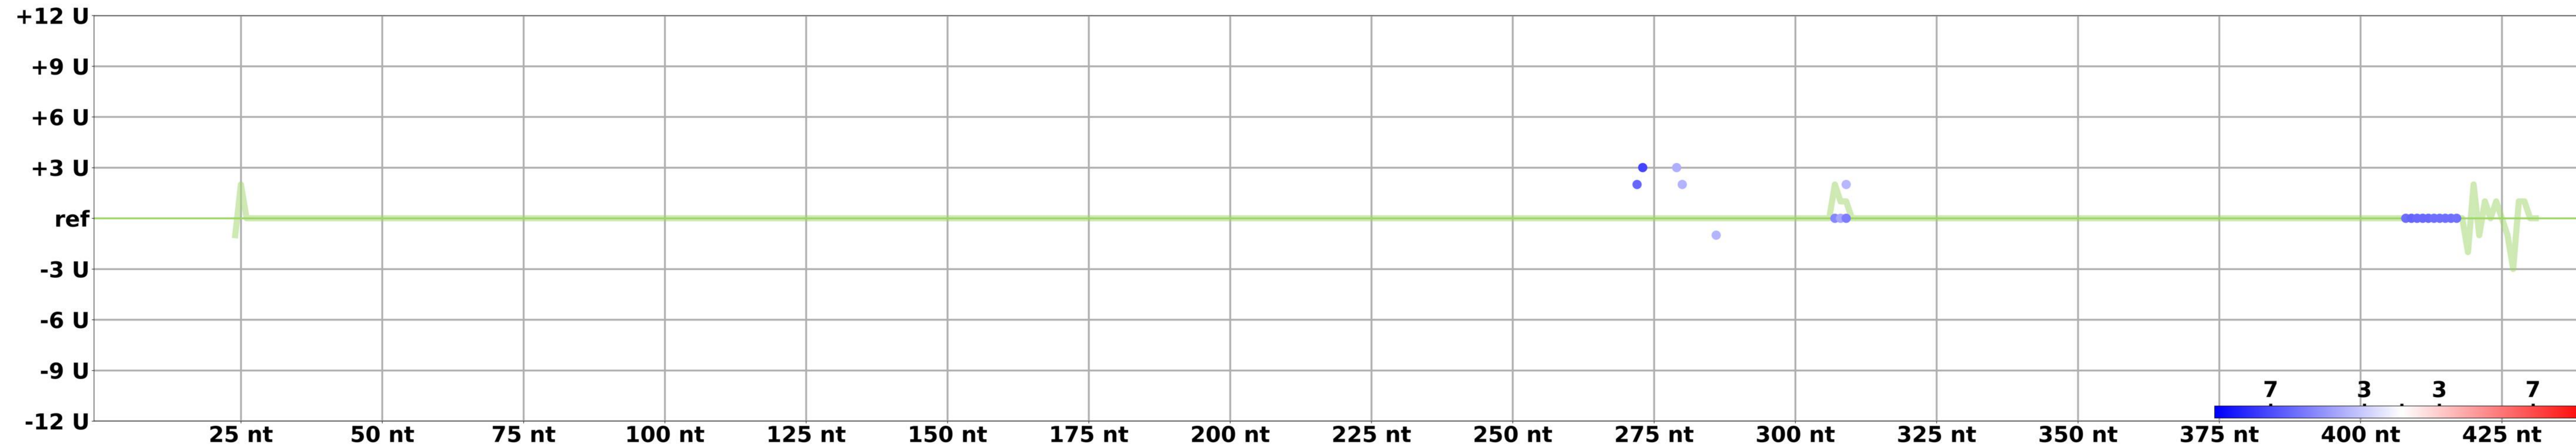

# Syl, CO2 : slow vs fed

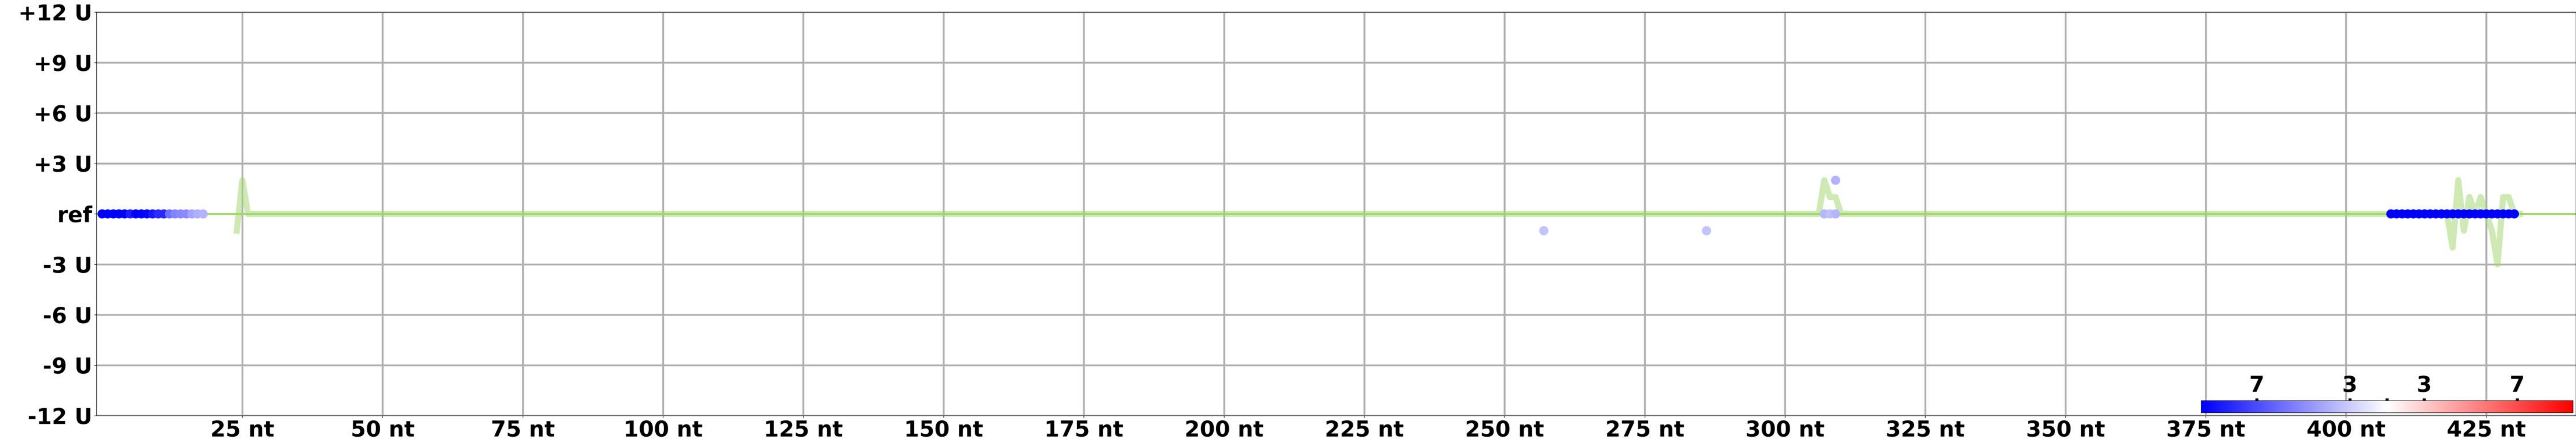

# Syl, CO3 : abrupt vs fed

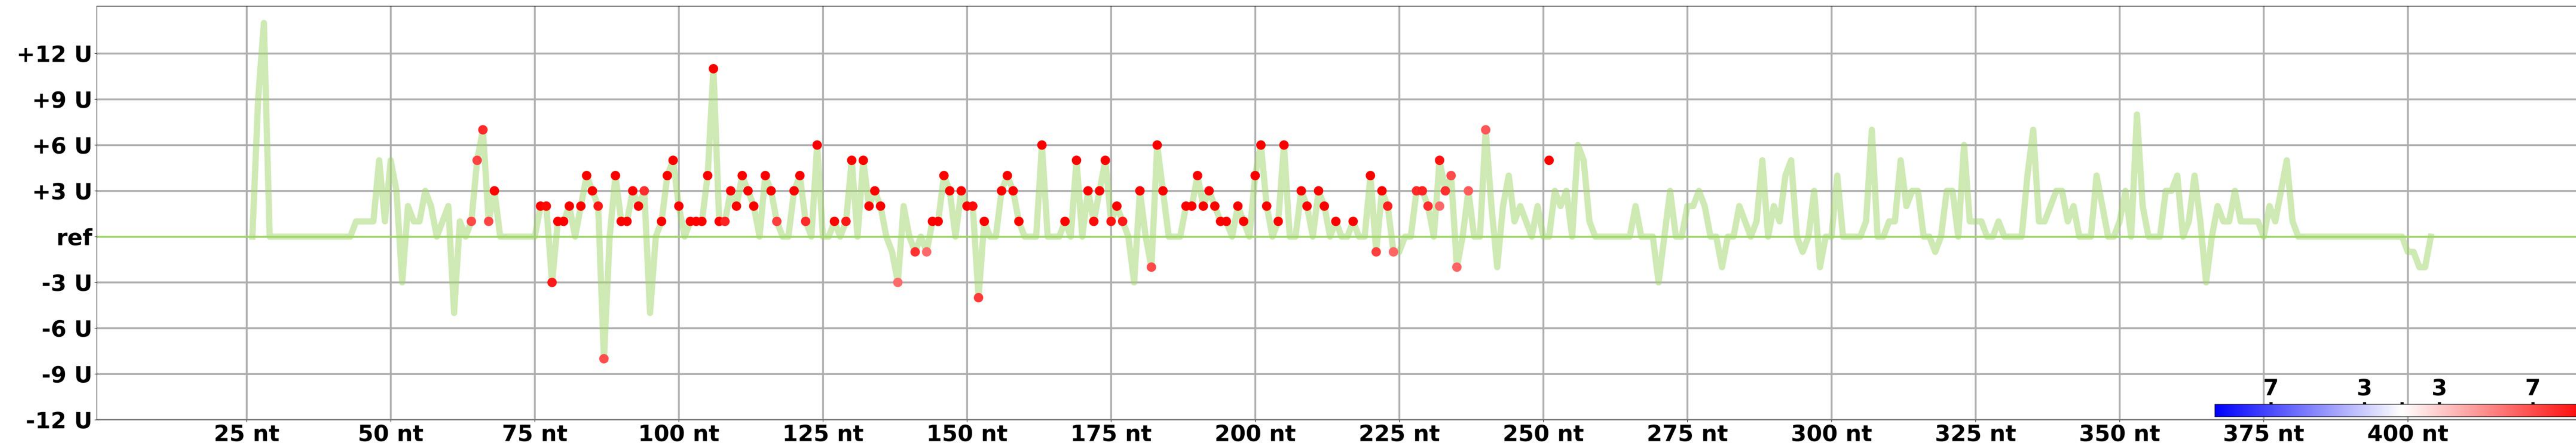

# Syl, CO3 : slow vs fed

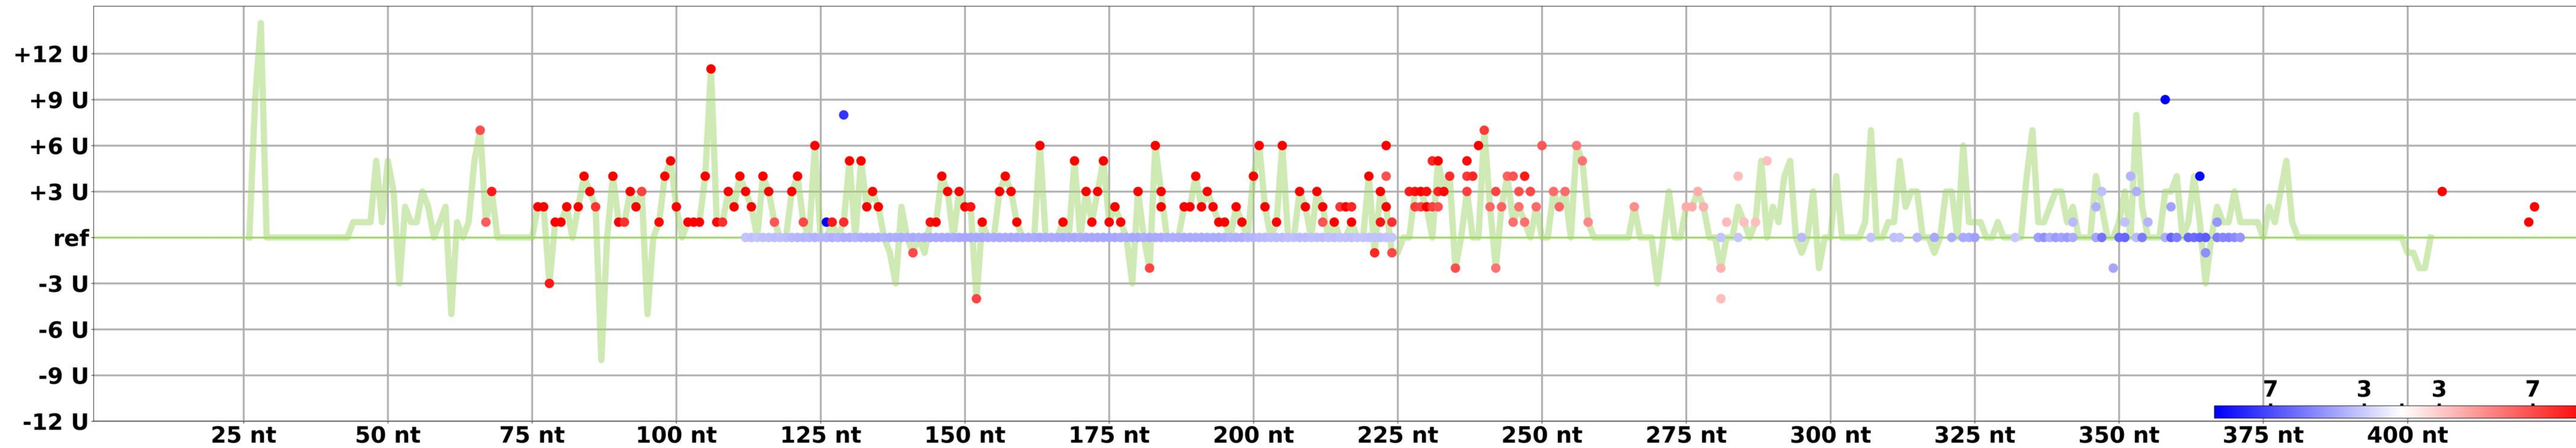

# Syl, CR3 : abrupt vs fed

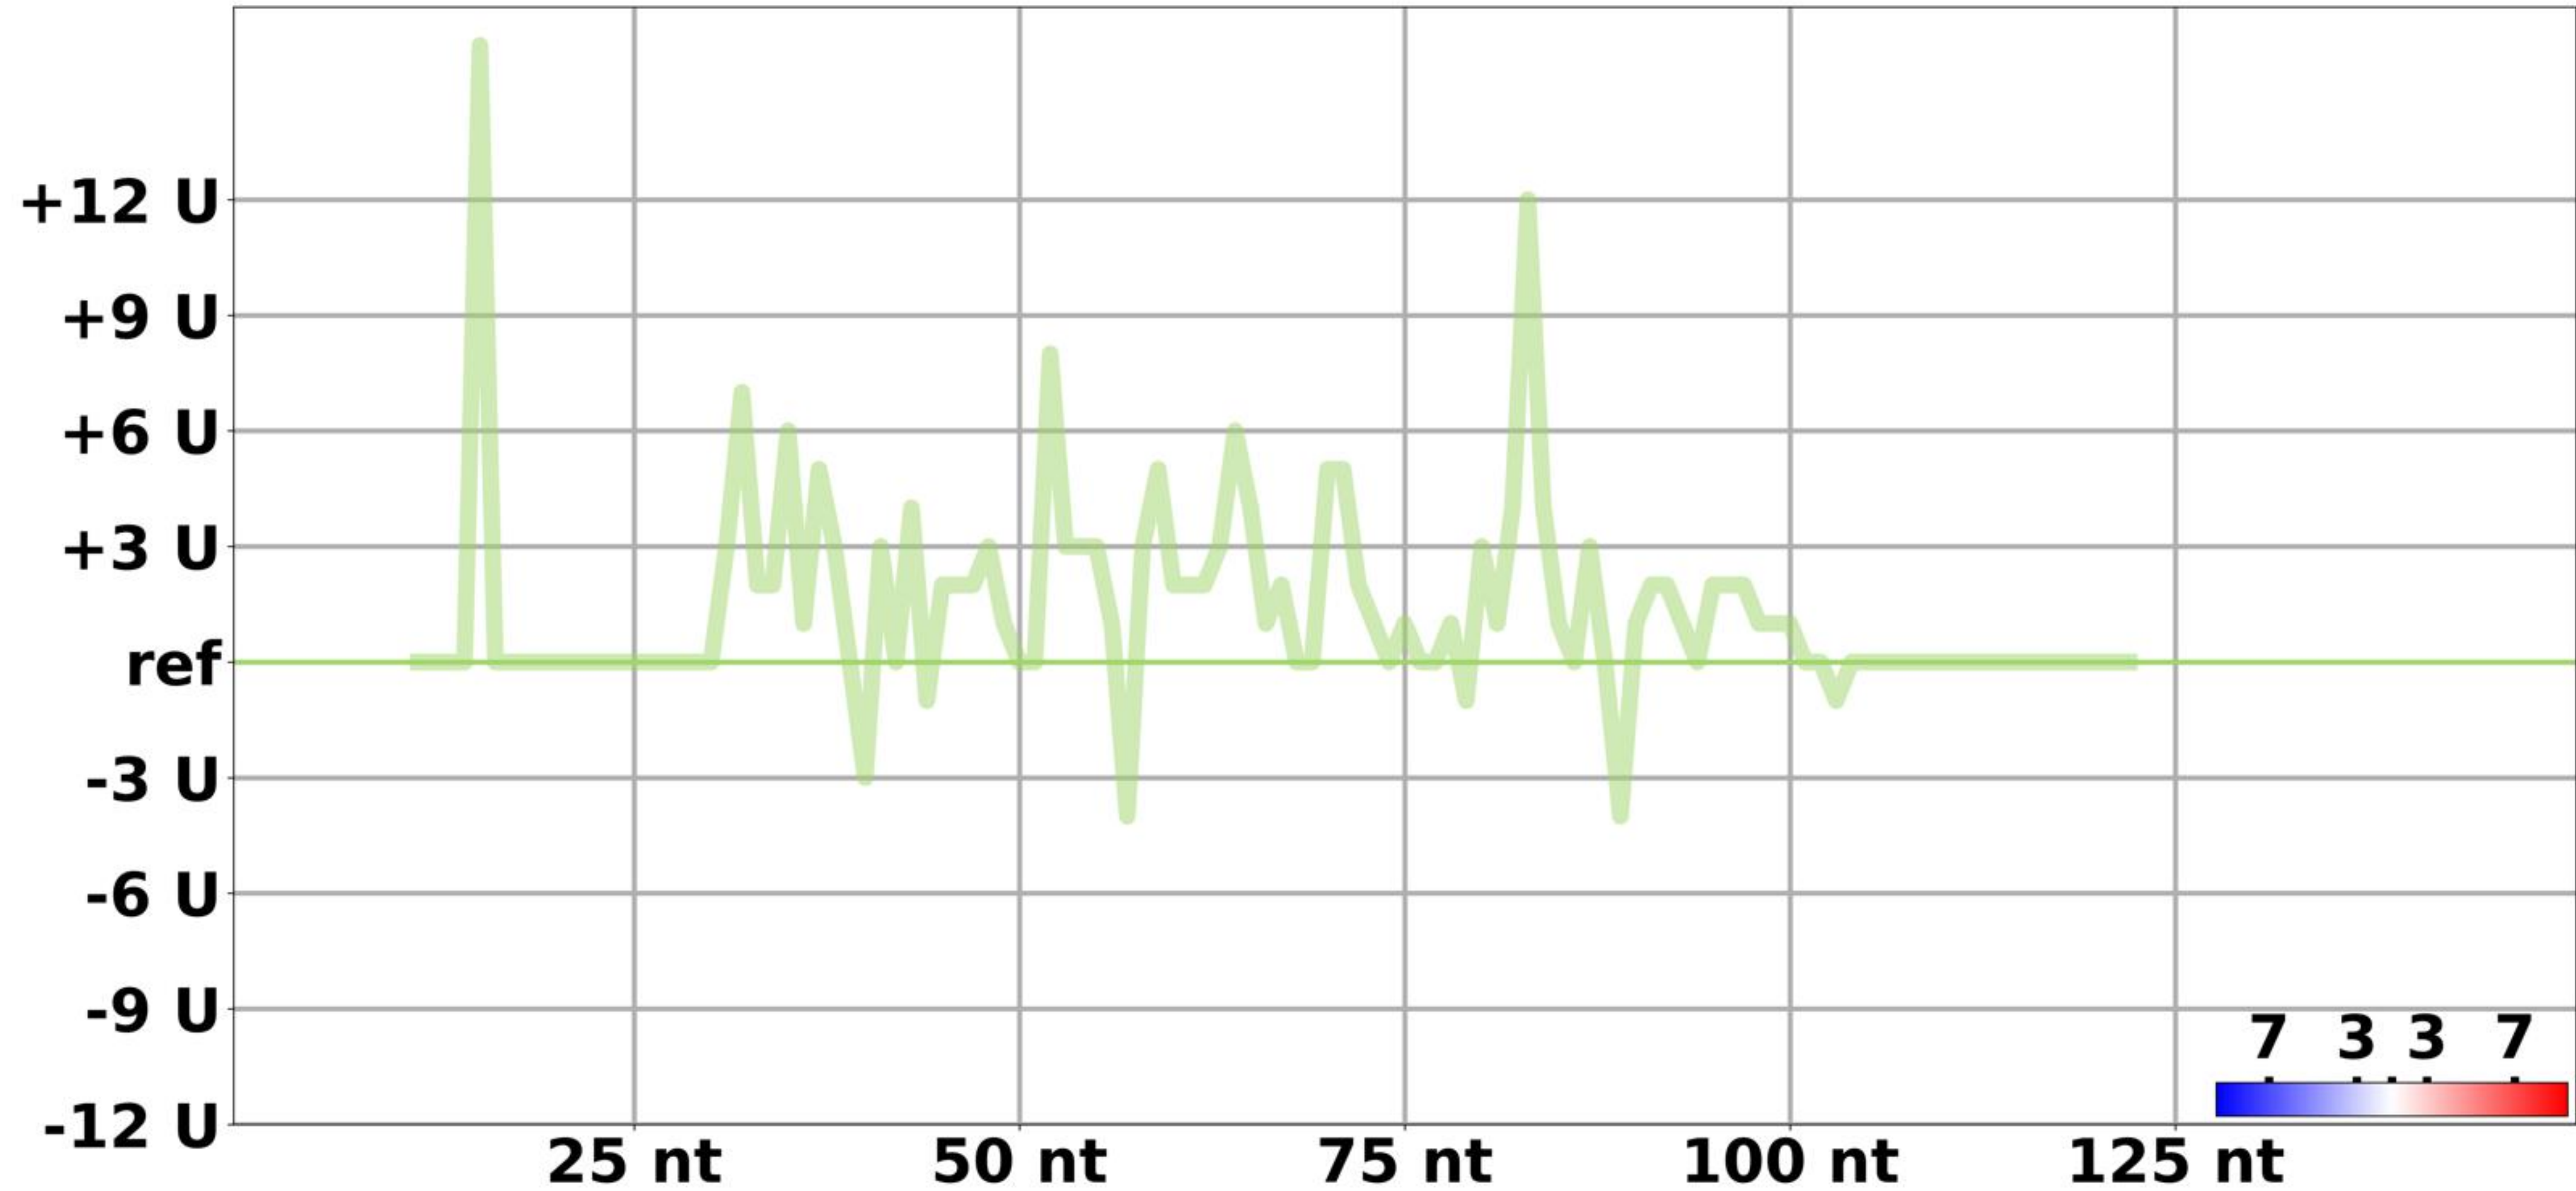

# Syl, CR3 : slow vs fed

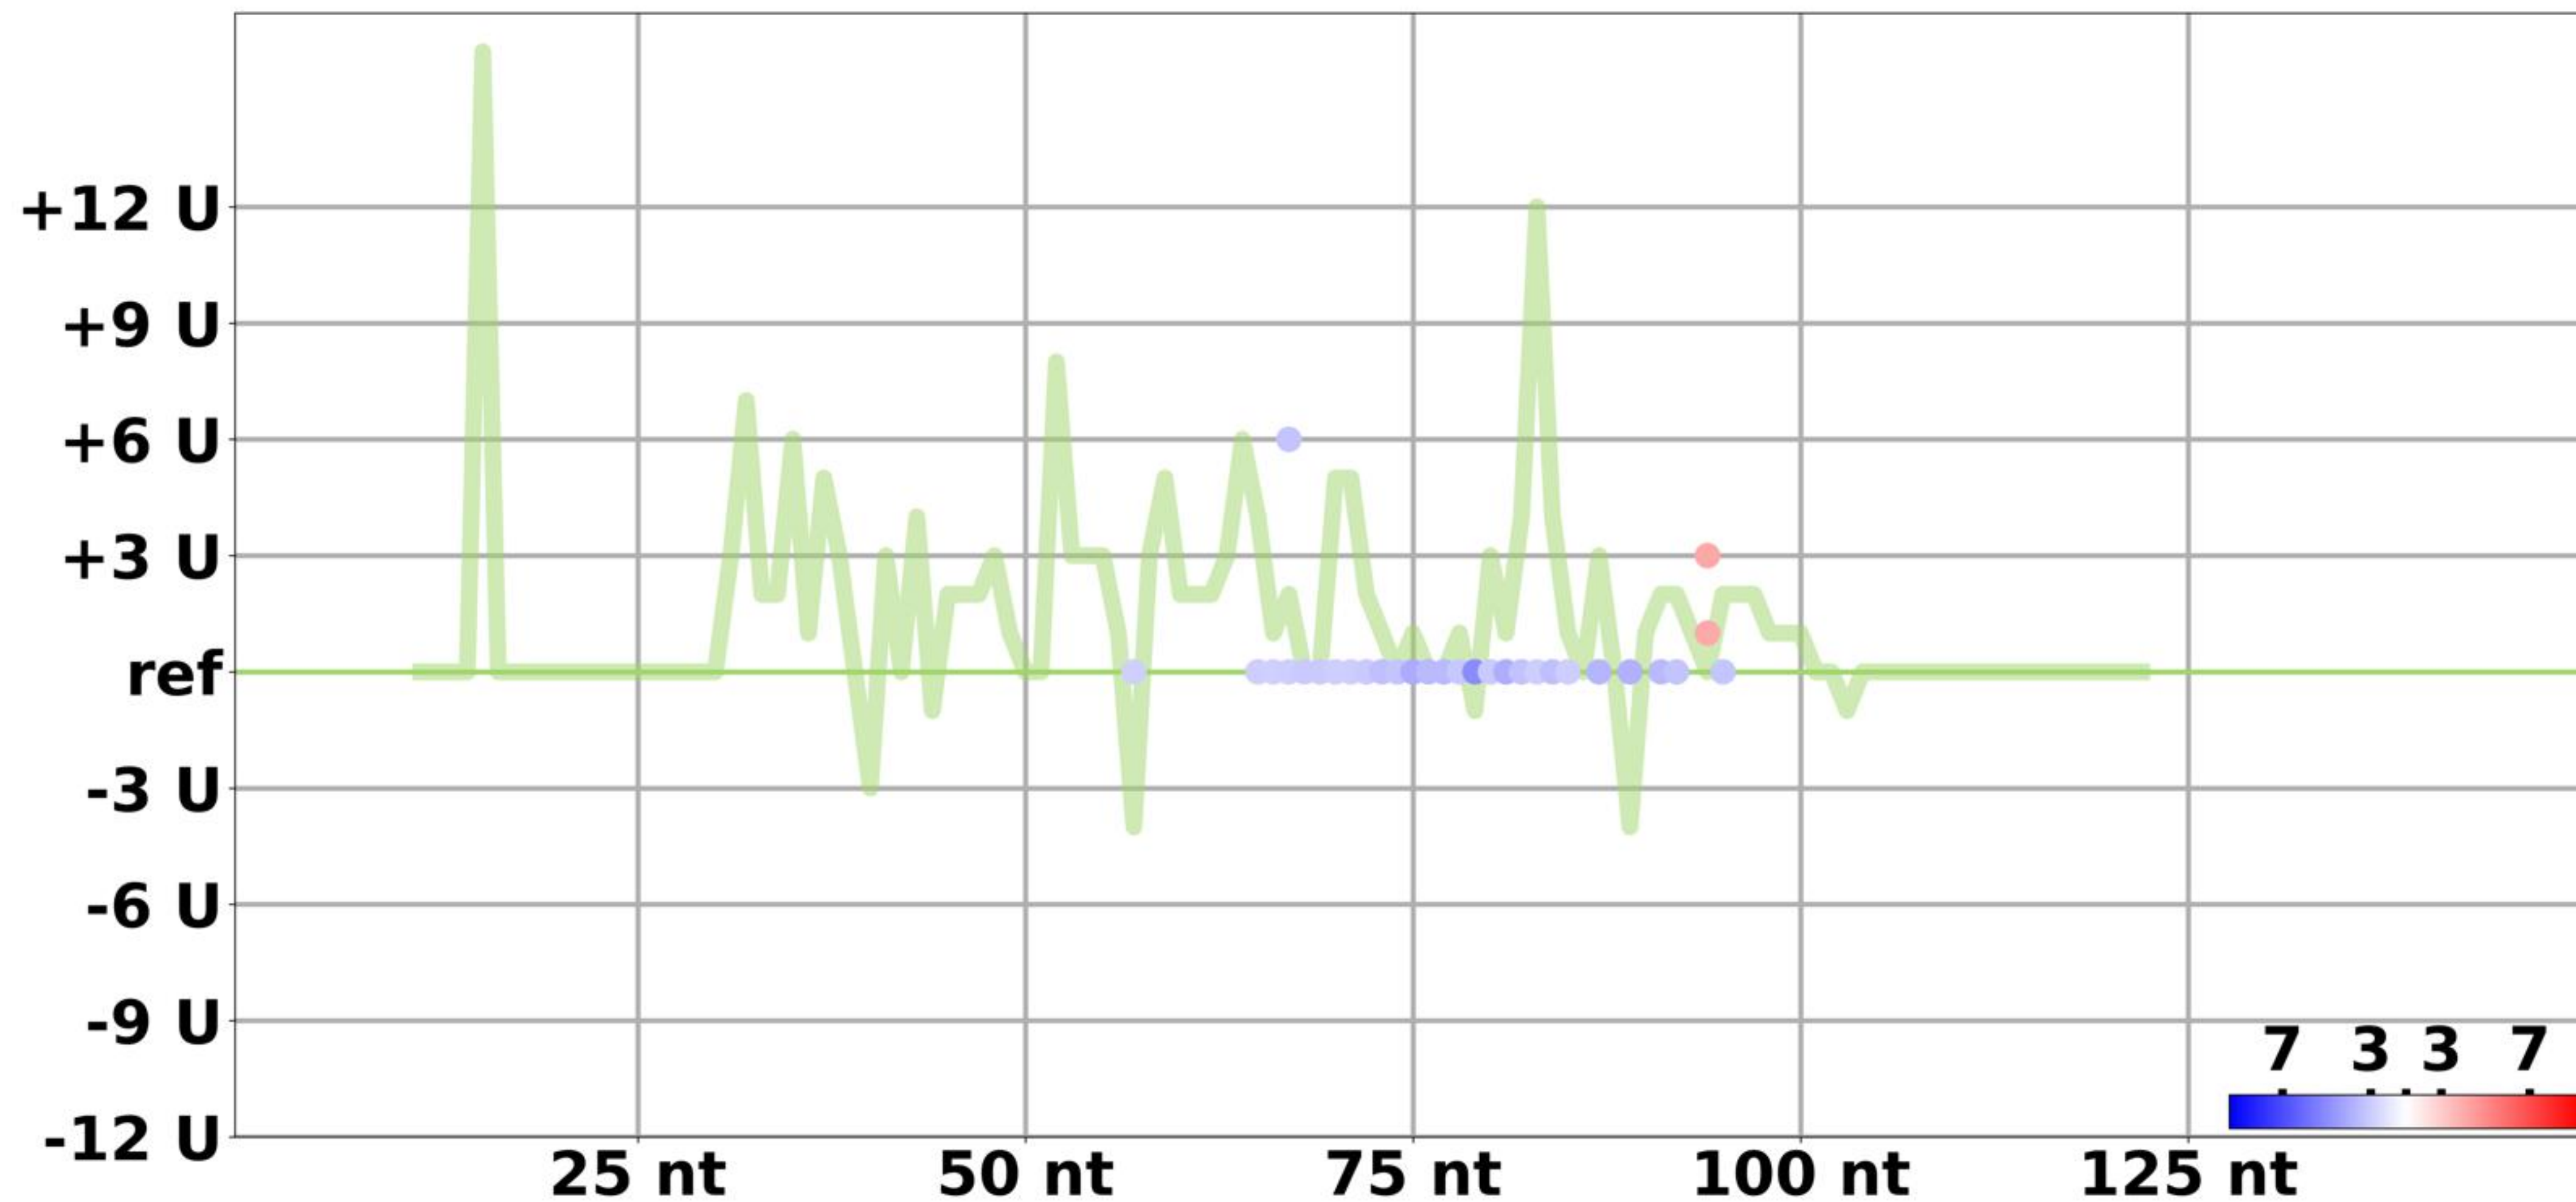

# Syl, CR4 : abrupt vs fed

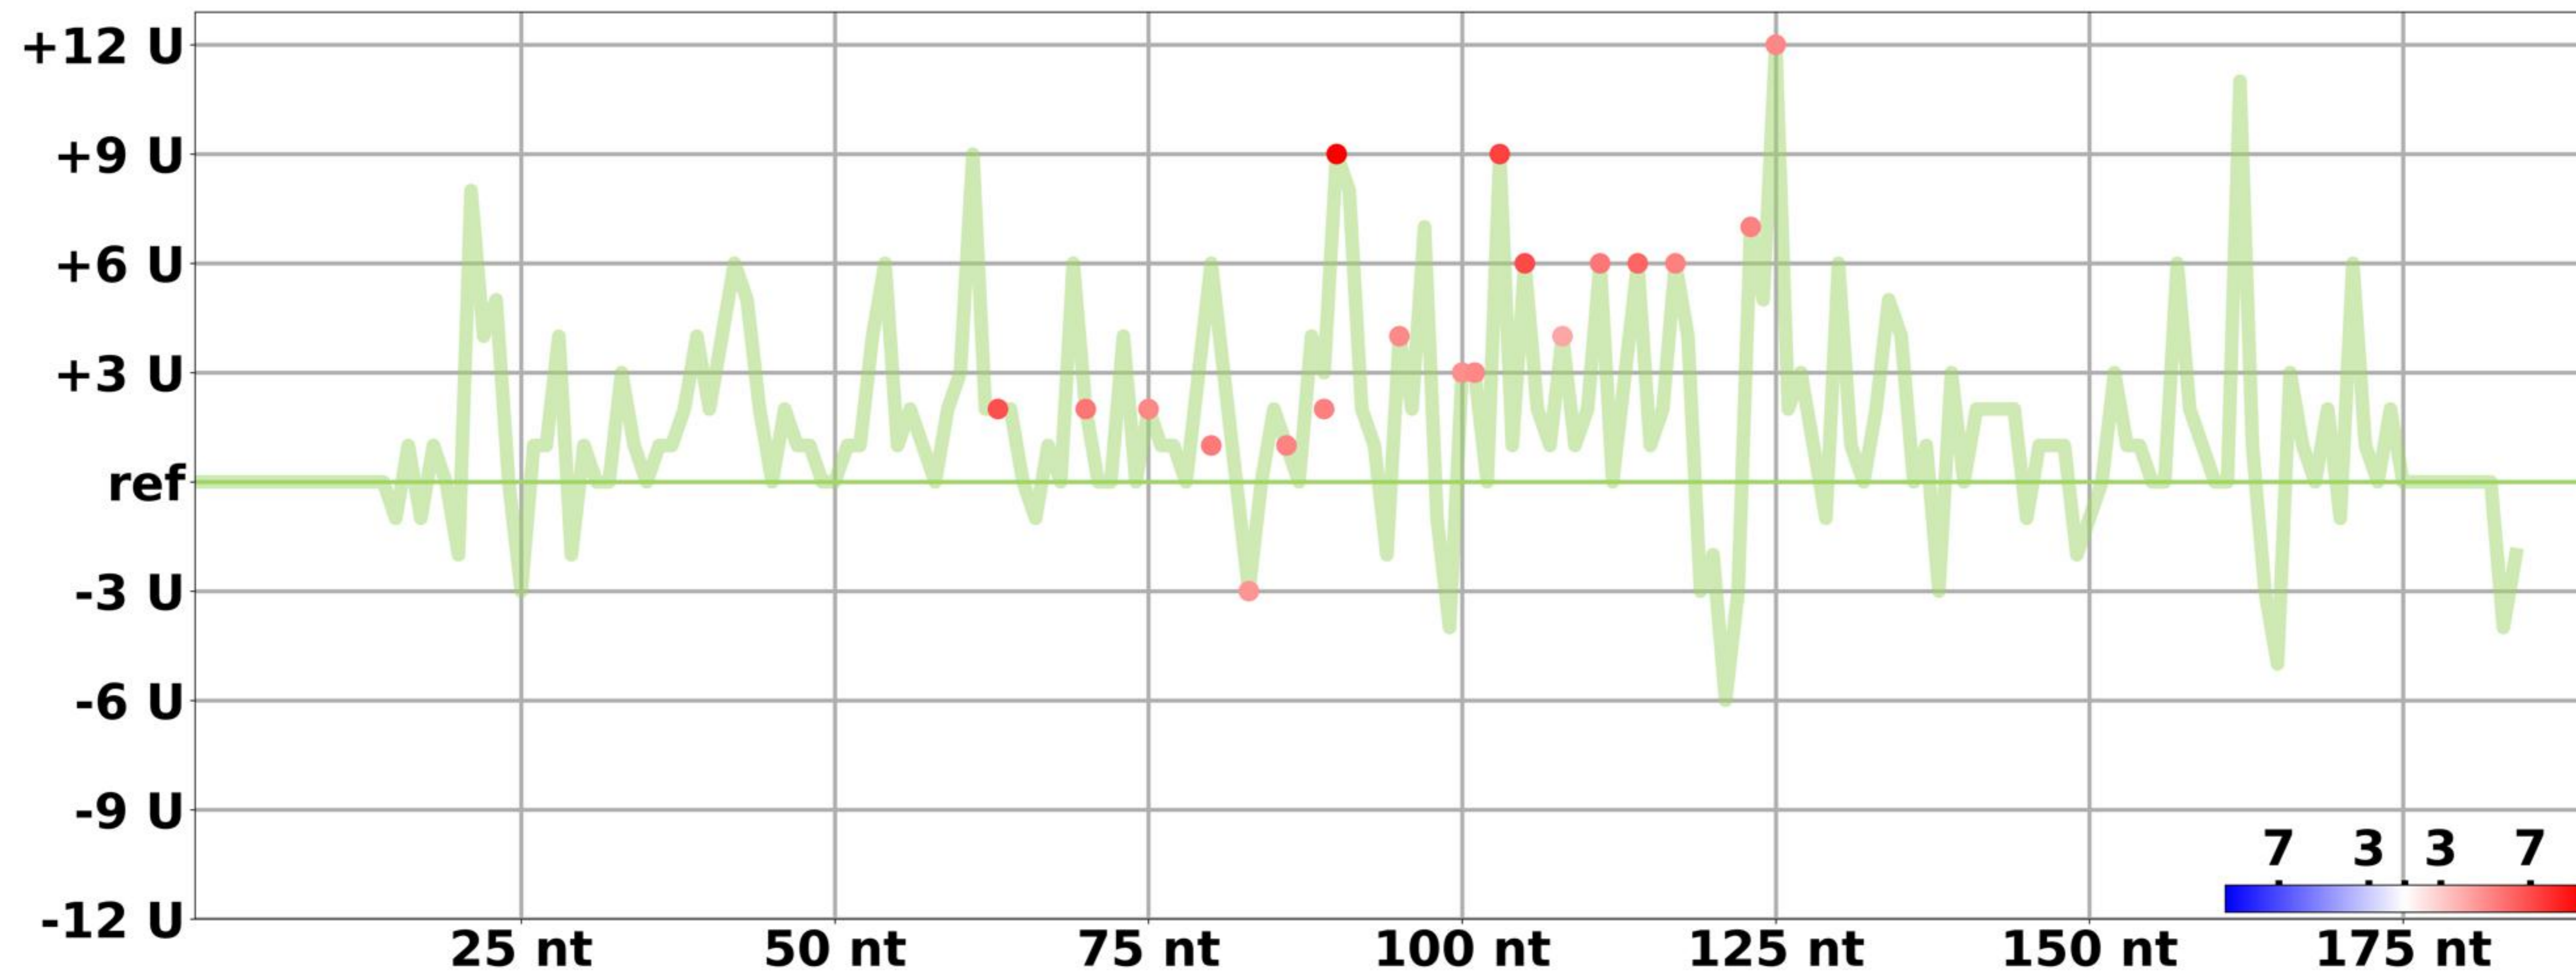

# Syl, CR4 : slow vs fed

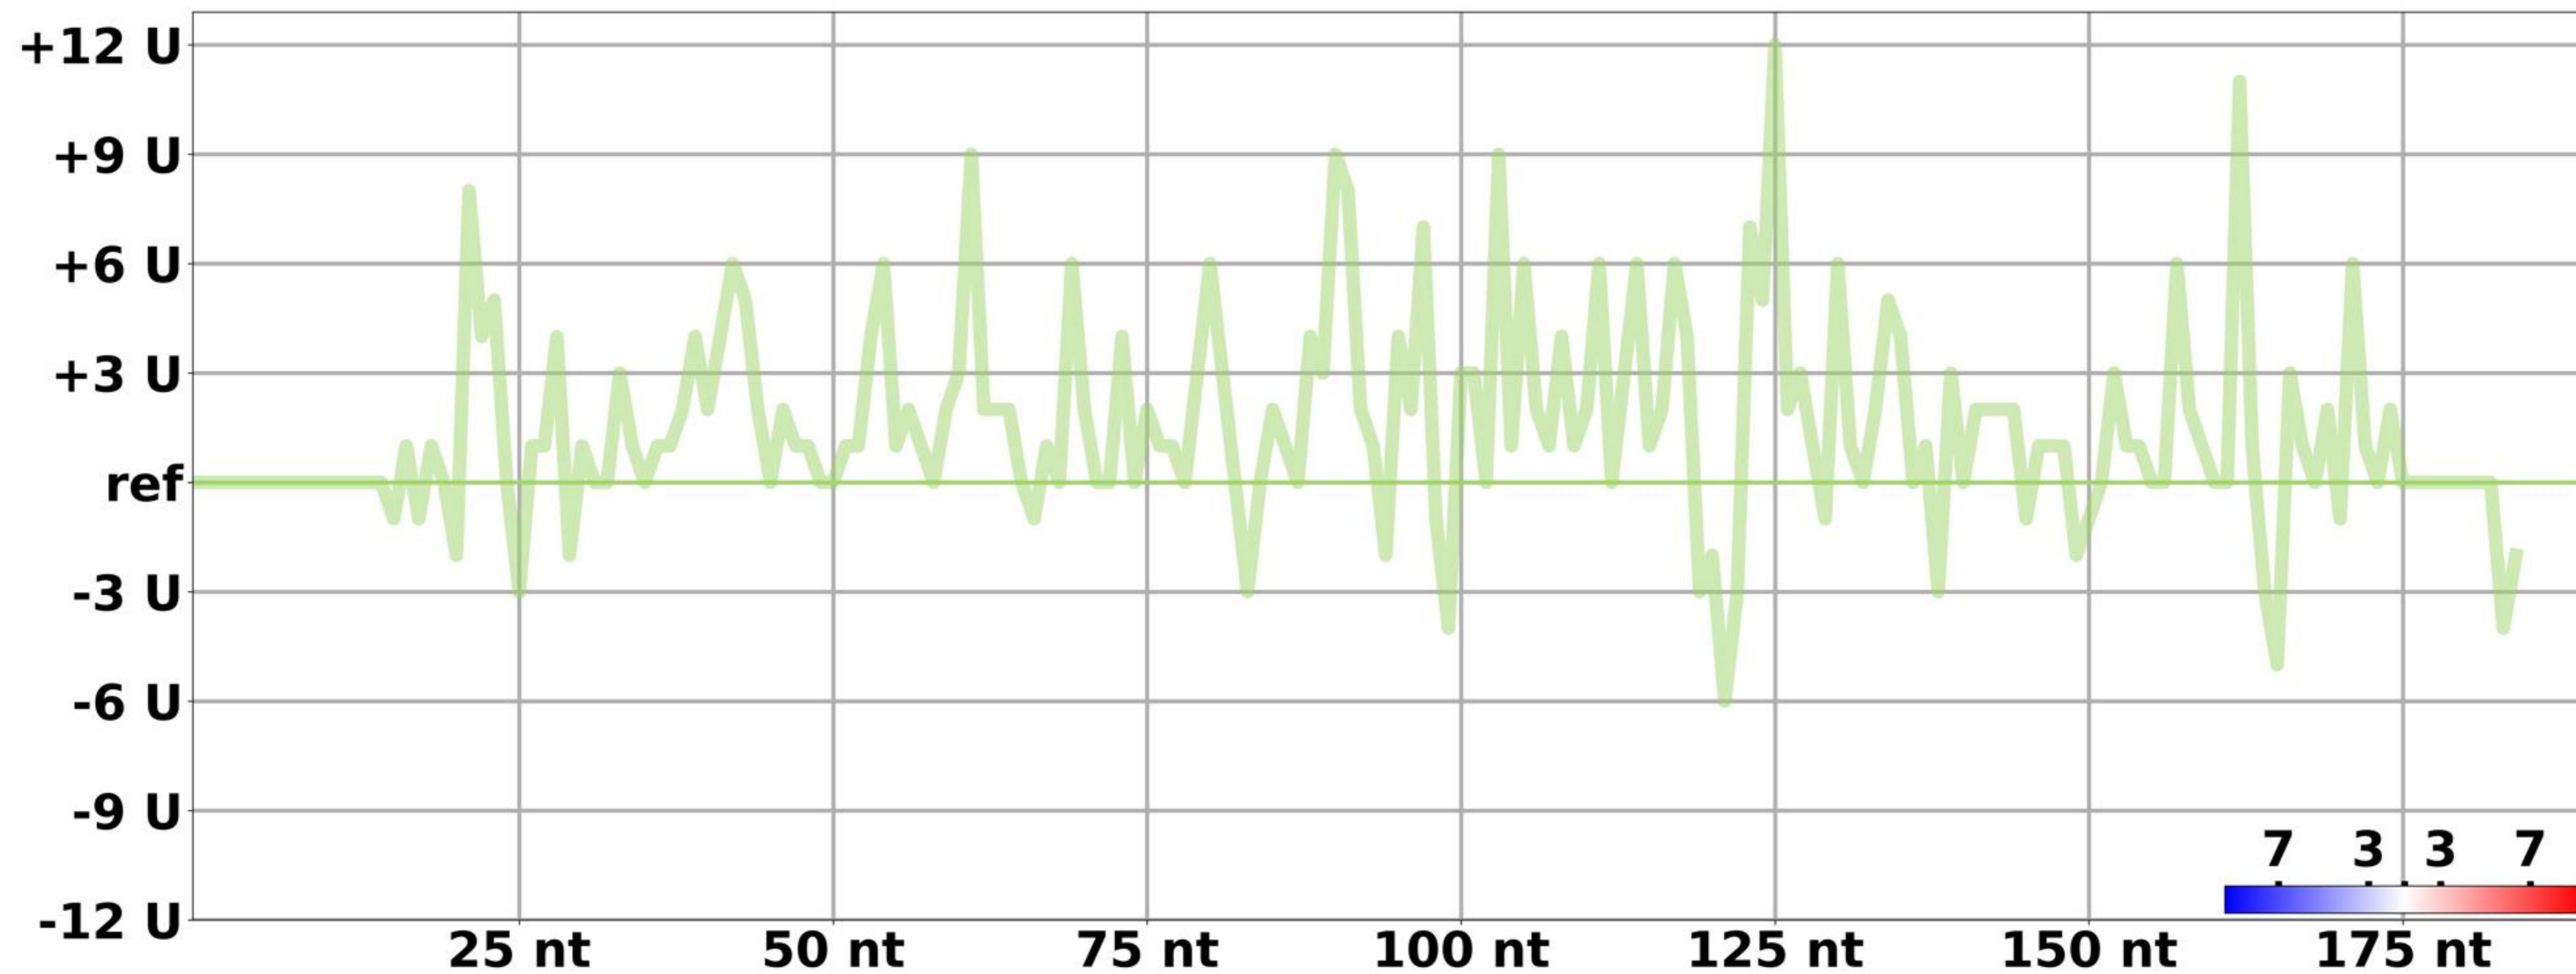

# Syl, CYb : abrupt vs fed

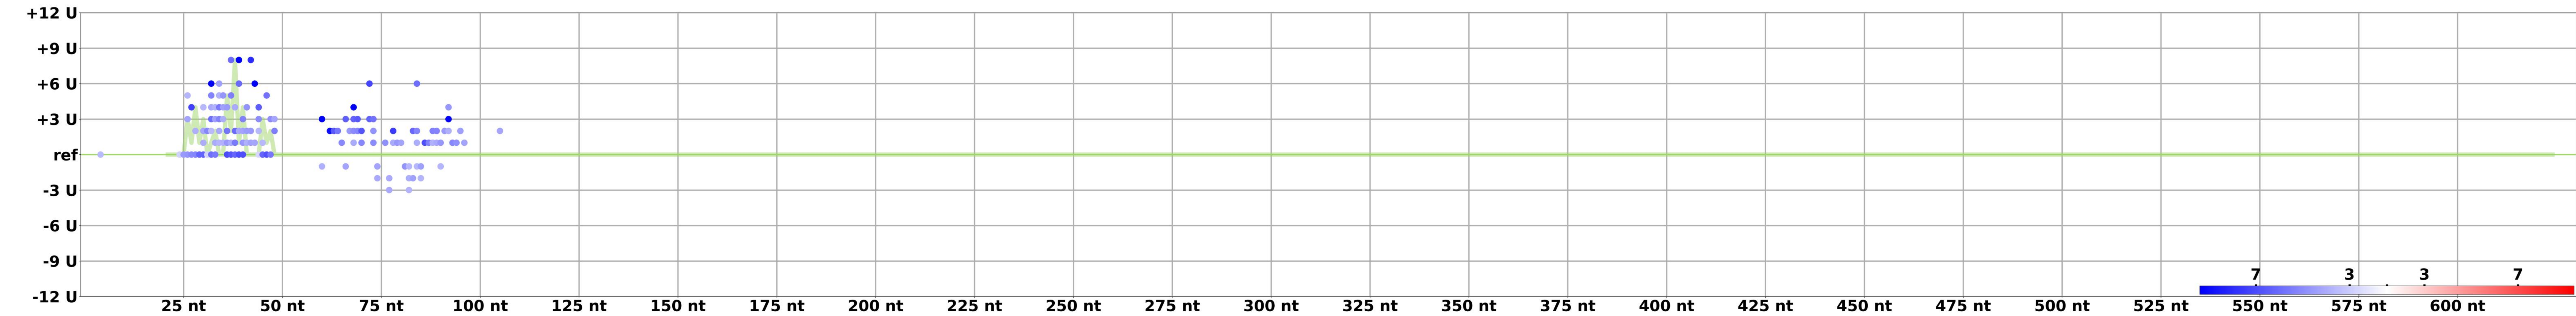

# Syl, CYb : slow vs fed

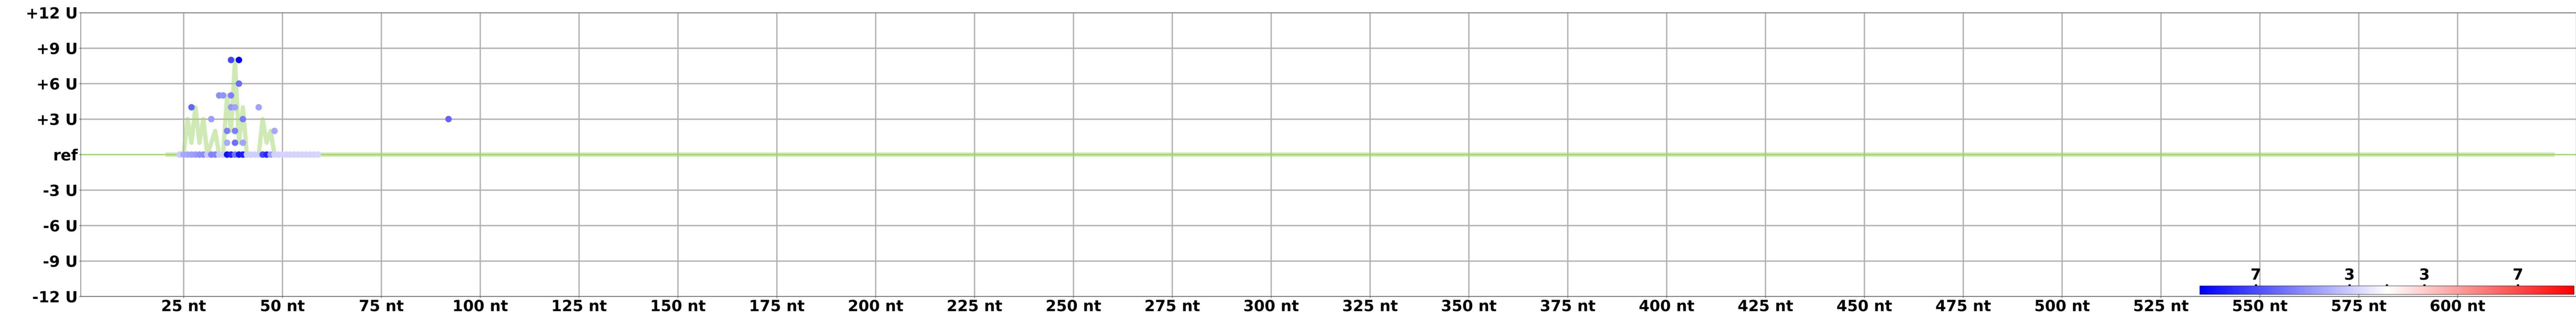

# Syl, MURF2 : abrupt vs fed

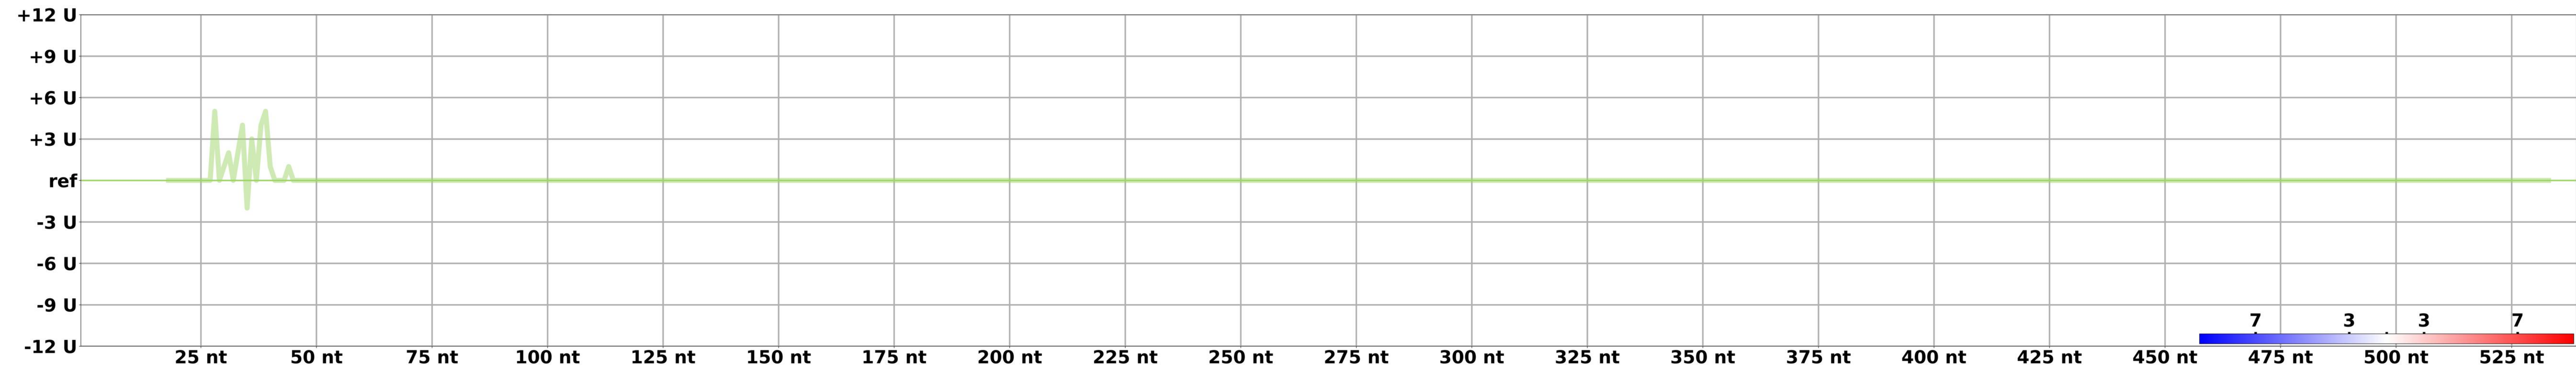

# Syl, MURF2 : slow vs fed

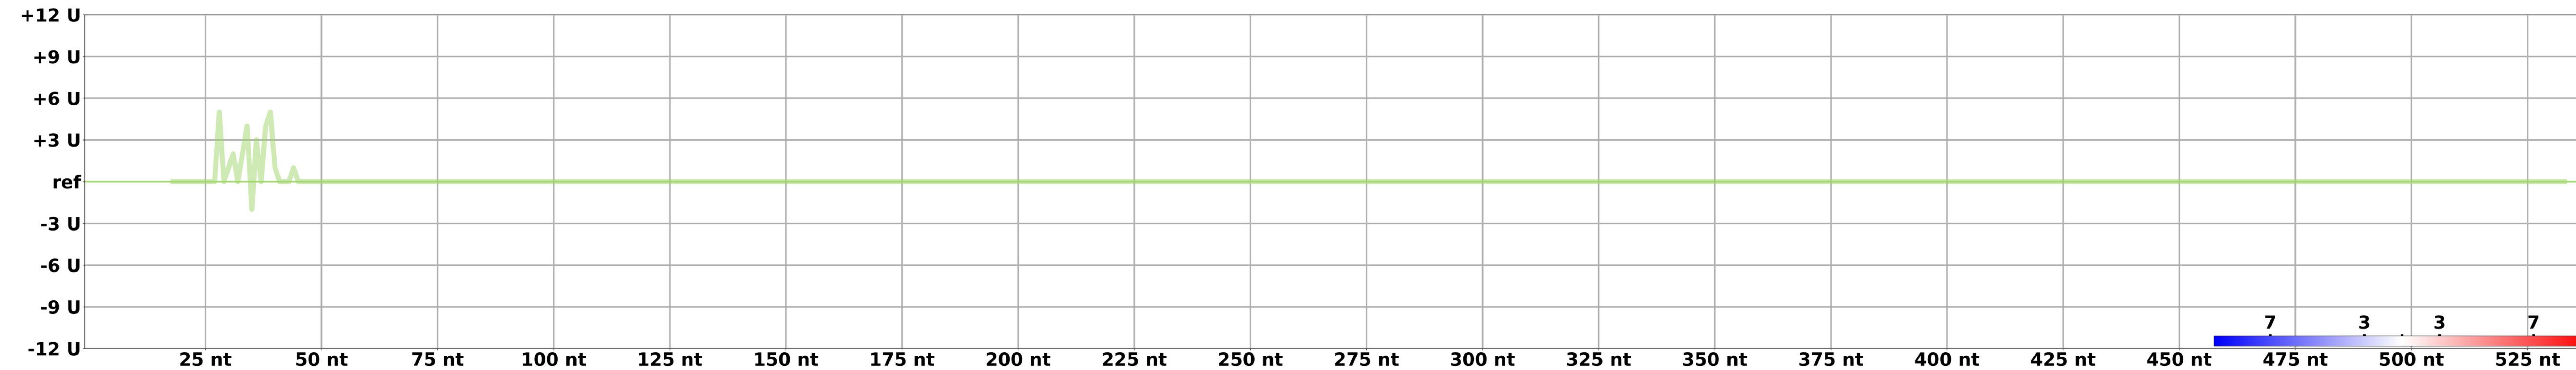

# Syl, ND3 : abrupt vs fed

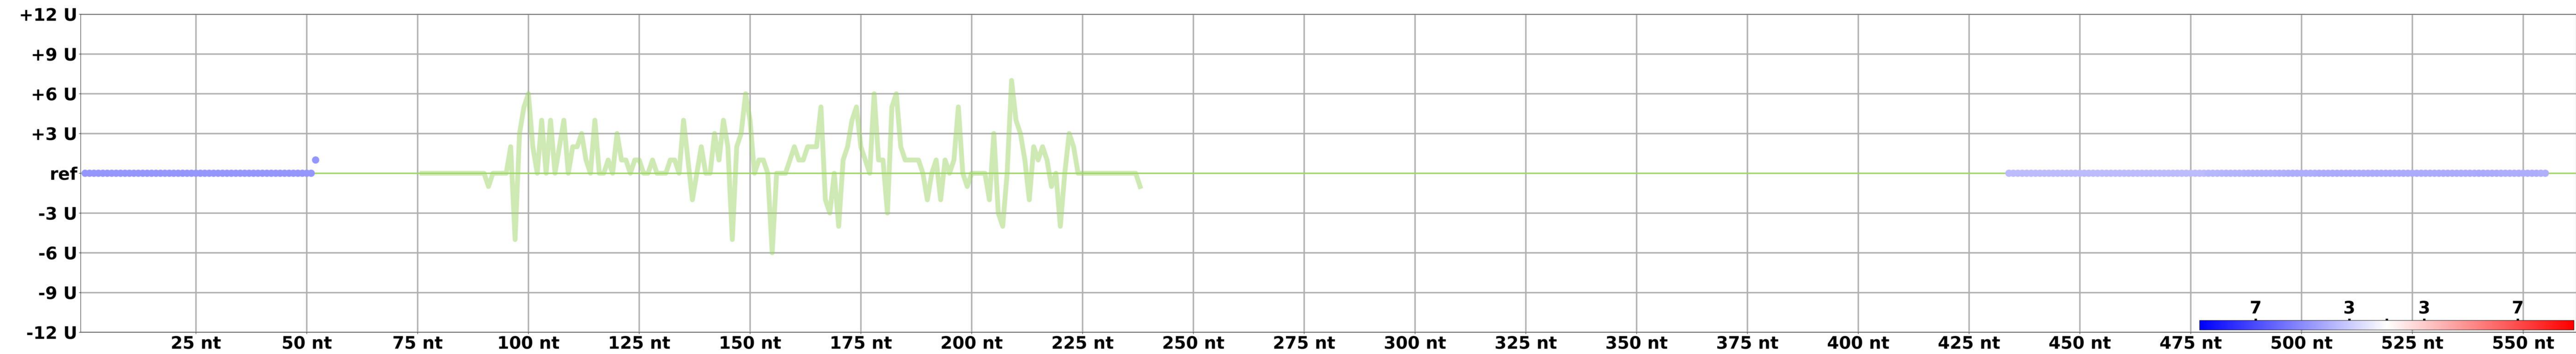

# Syl, ND3 : slow vs fed

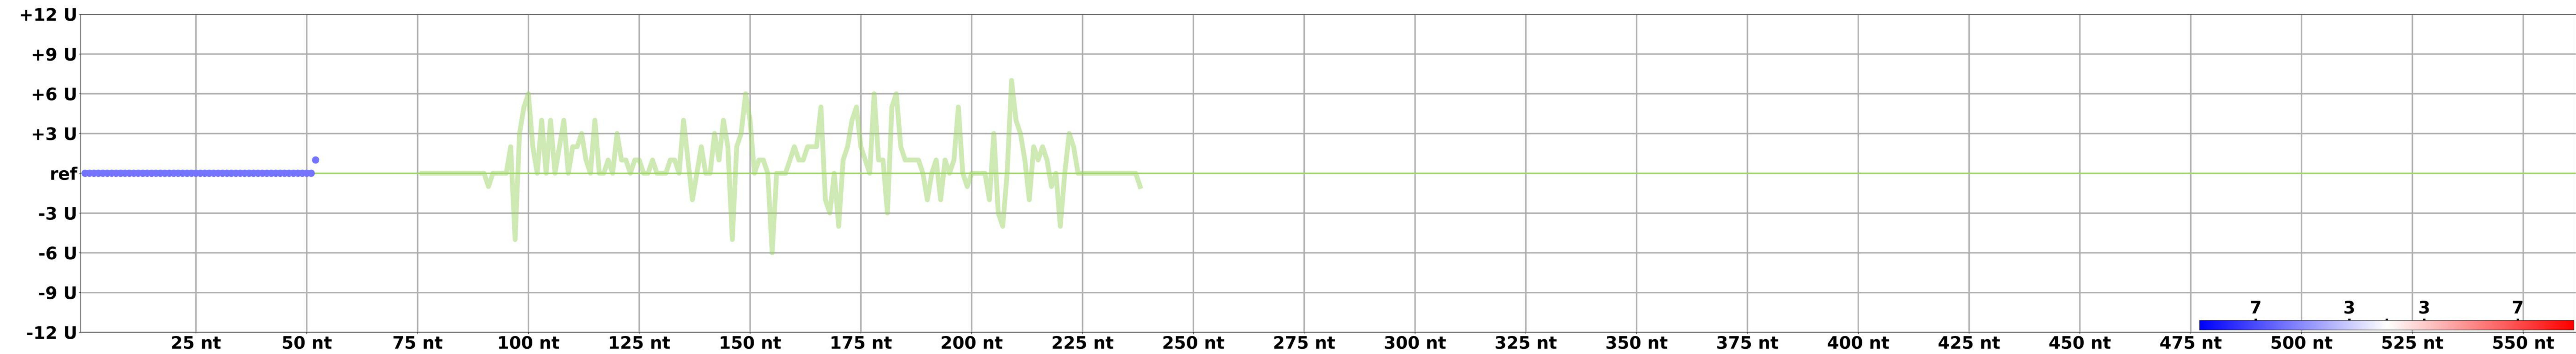

# Syl, ND7 : abrupt vs fed

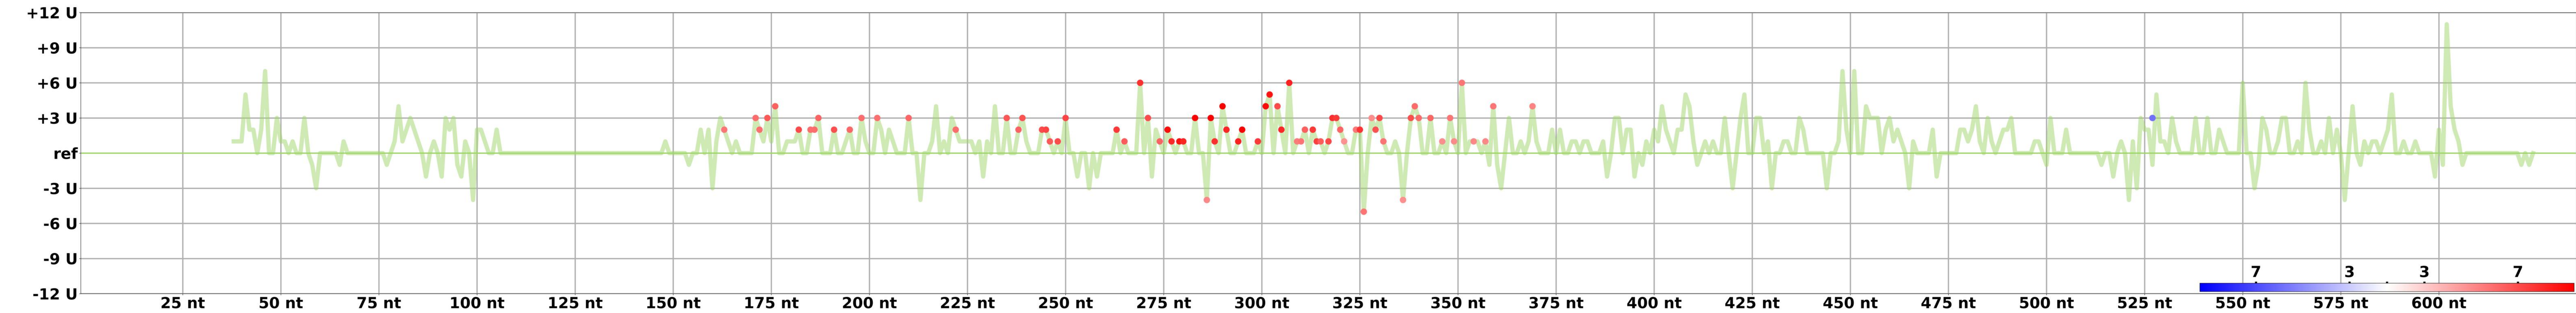

# Syl, ND7 : slow vs fed

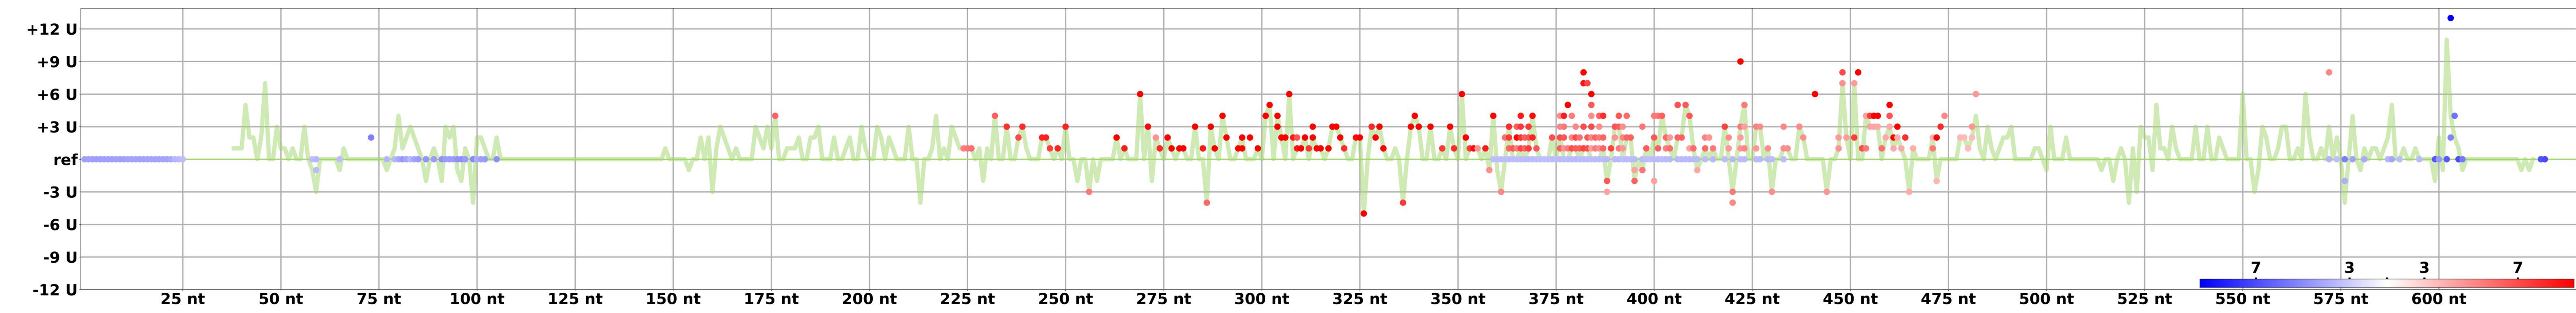

# Syl, ND8 : abrupt vs fed

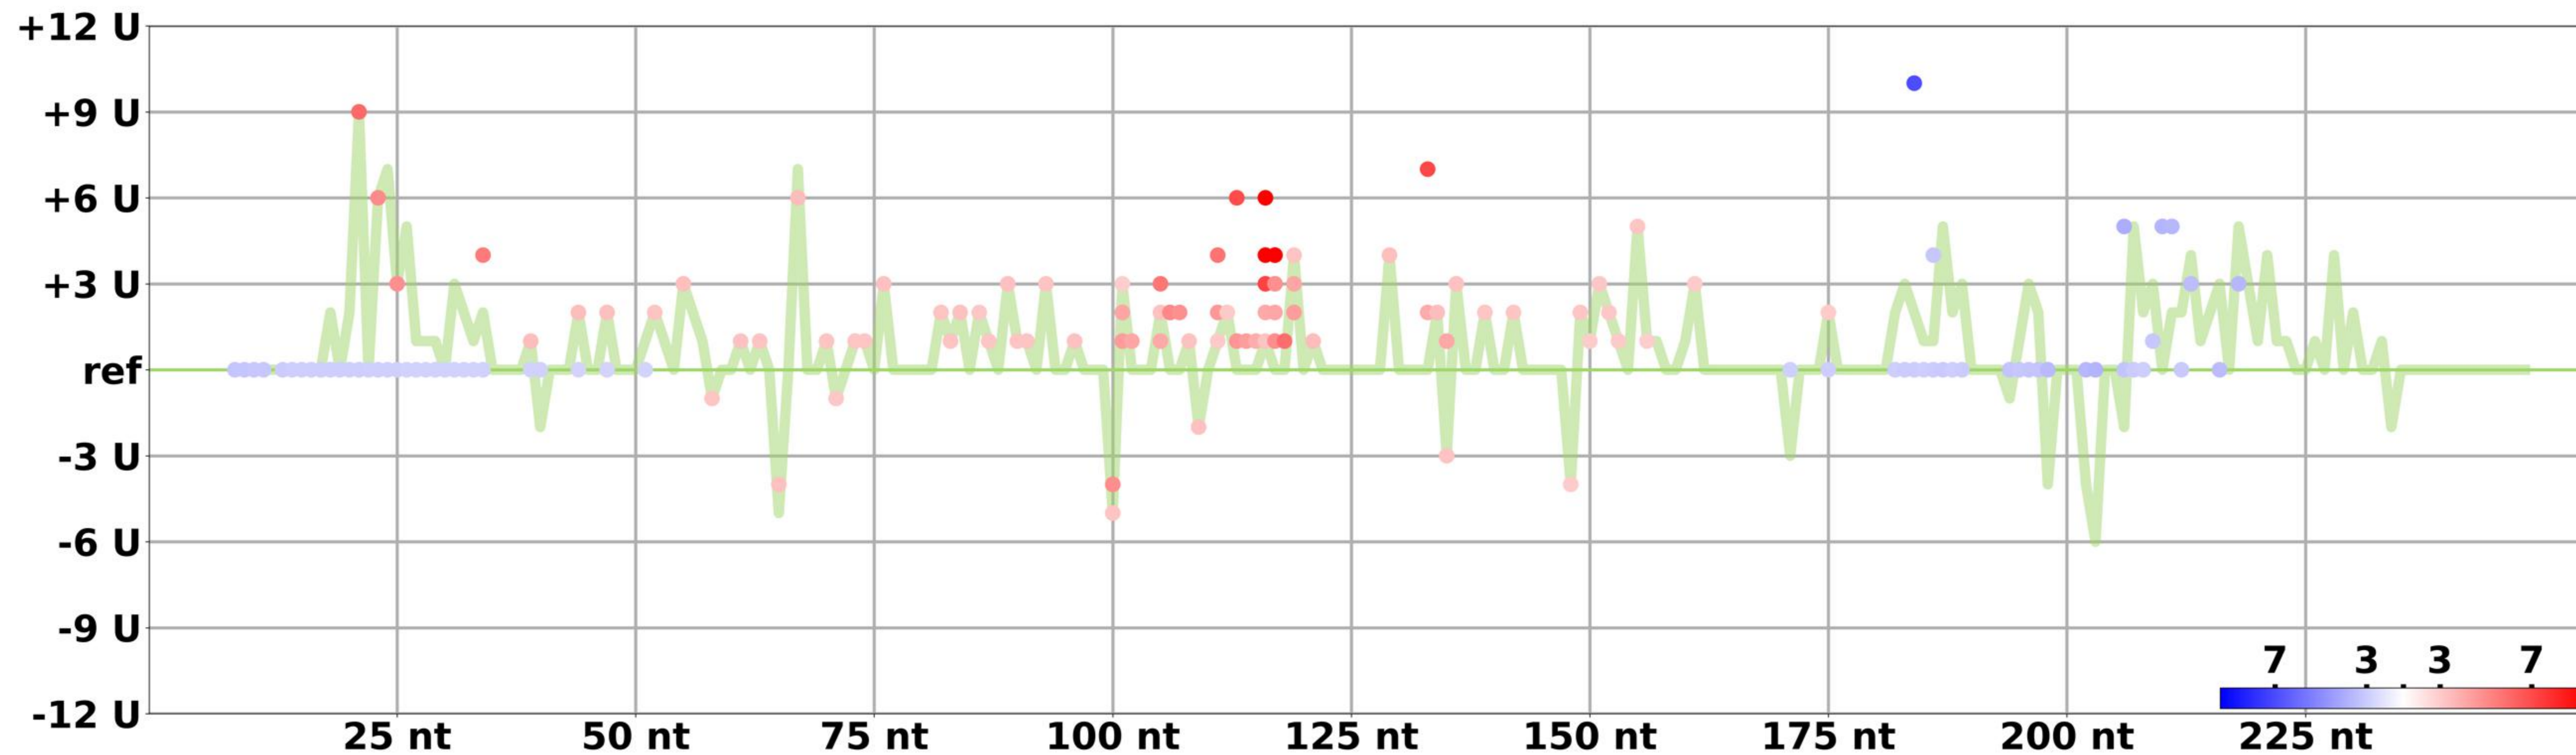

# Syl, ND8 : slow vs fed

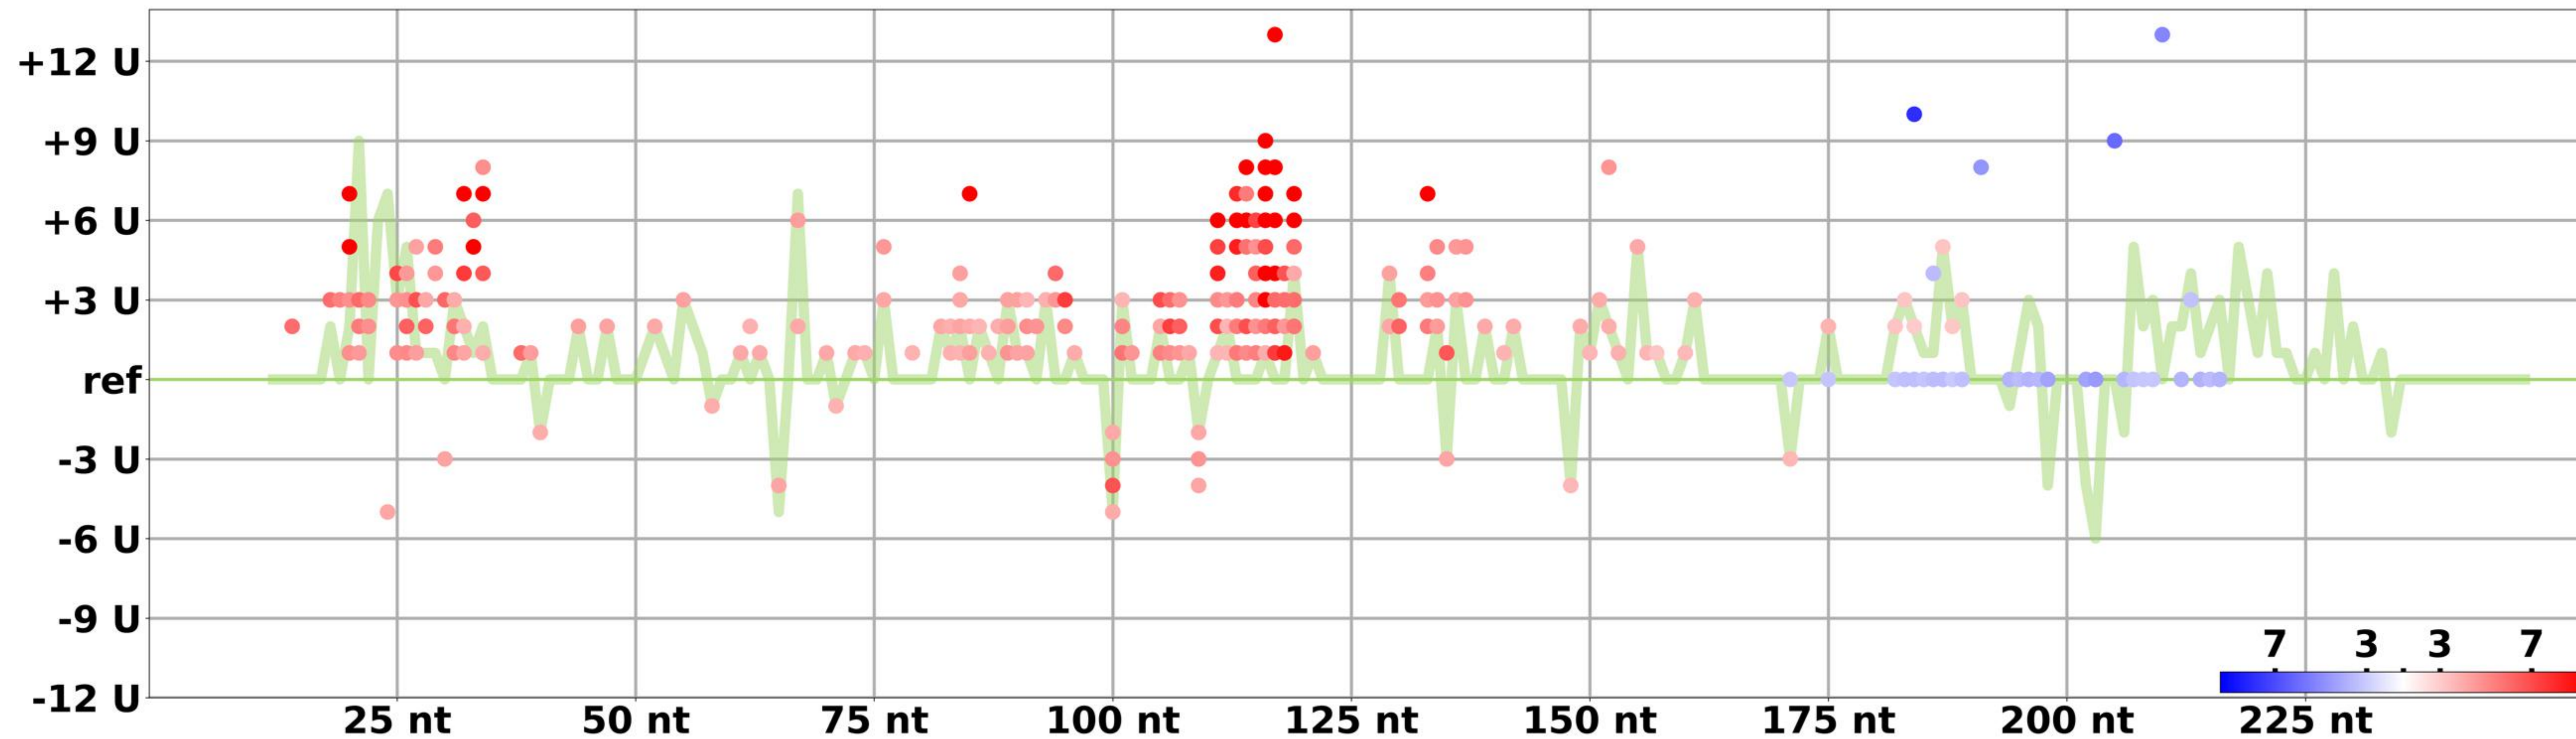

# Syl, ND9 : abrupt vs fed

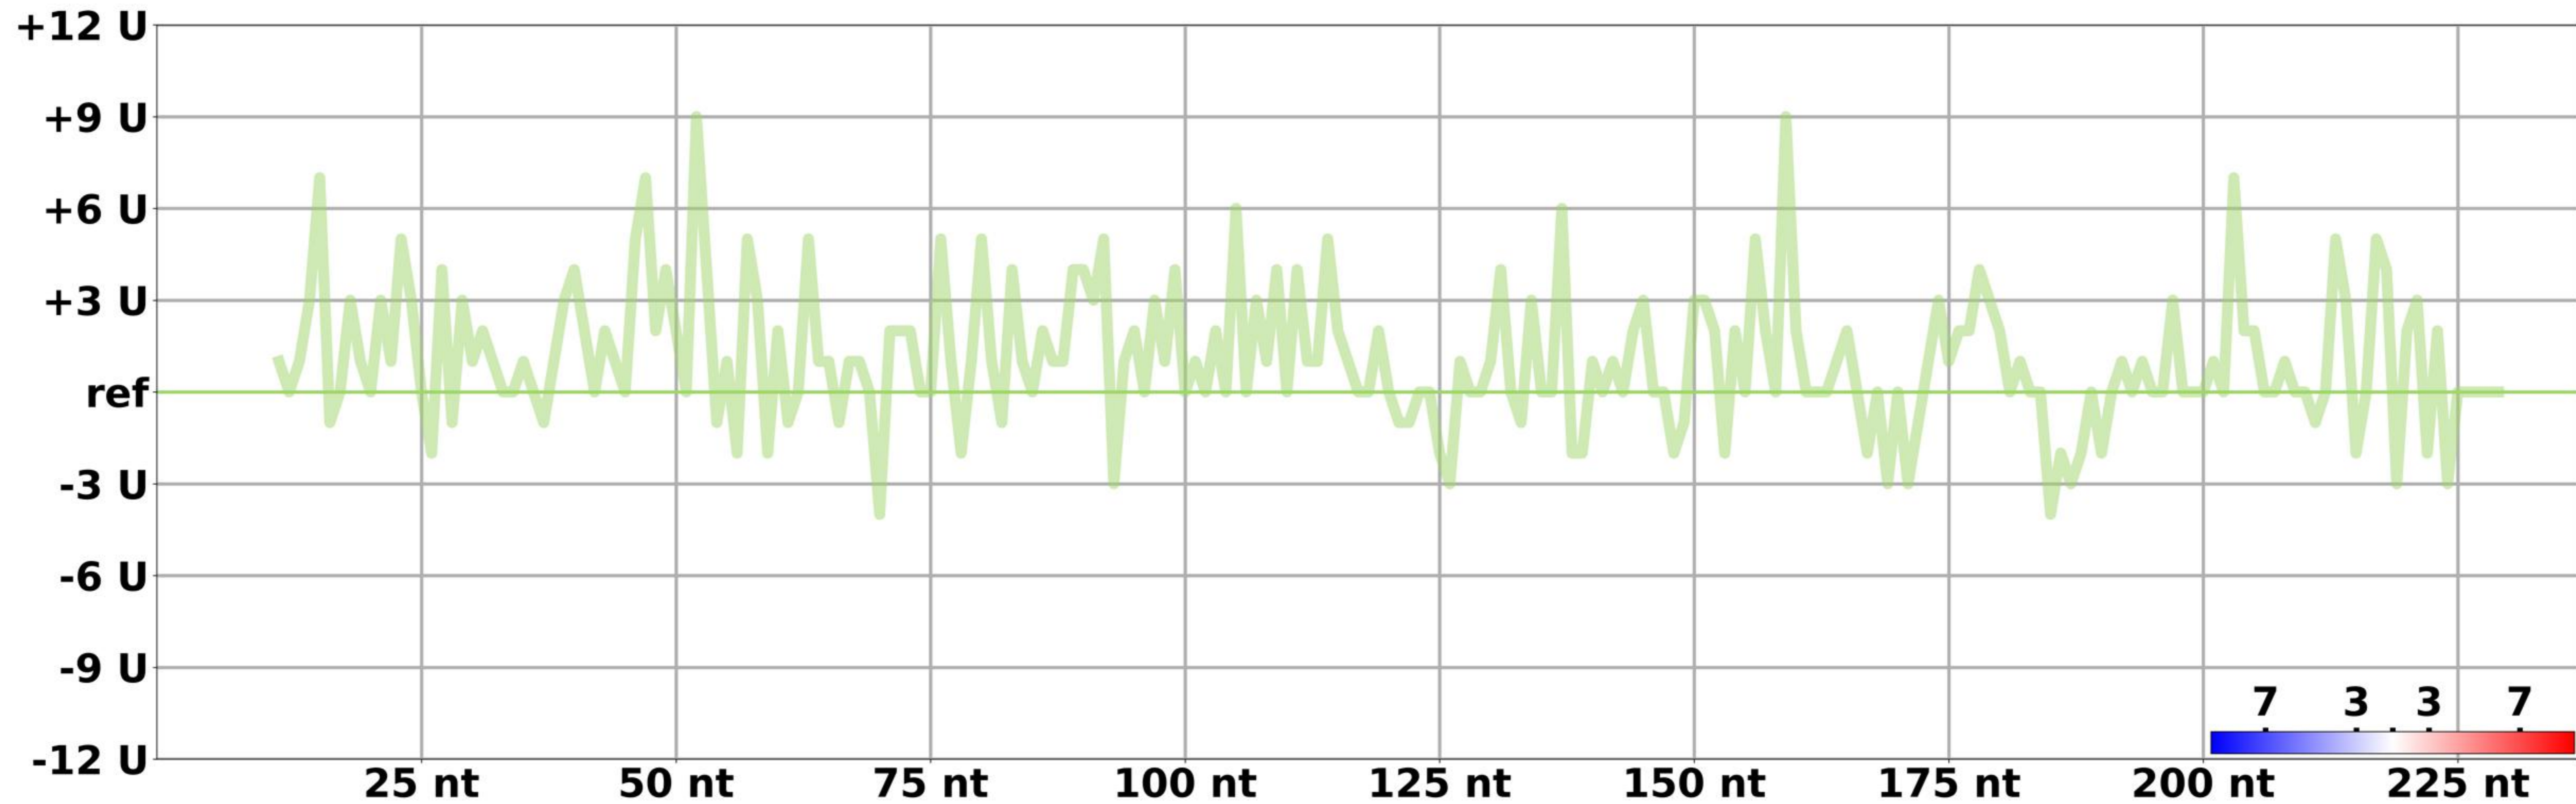

# Syl, ND9 : slow vs fed

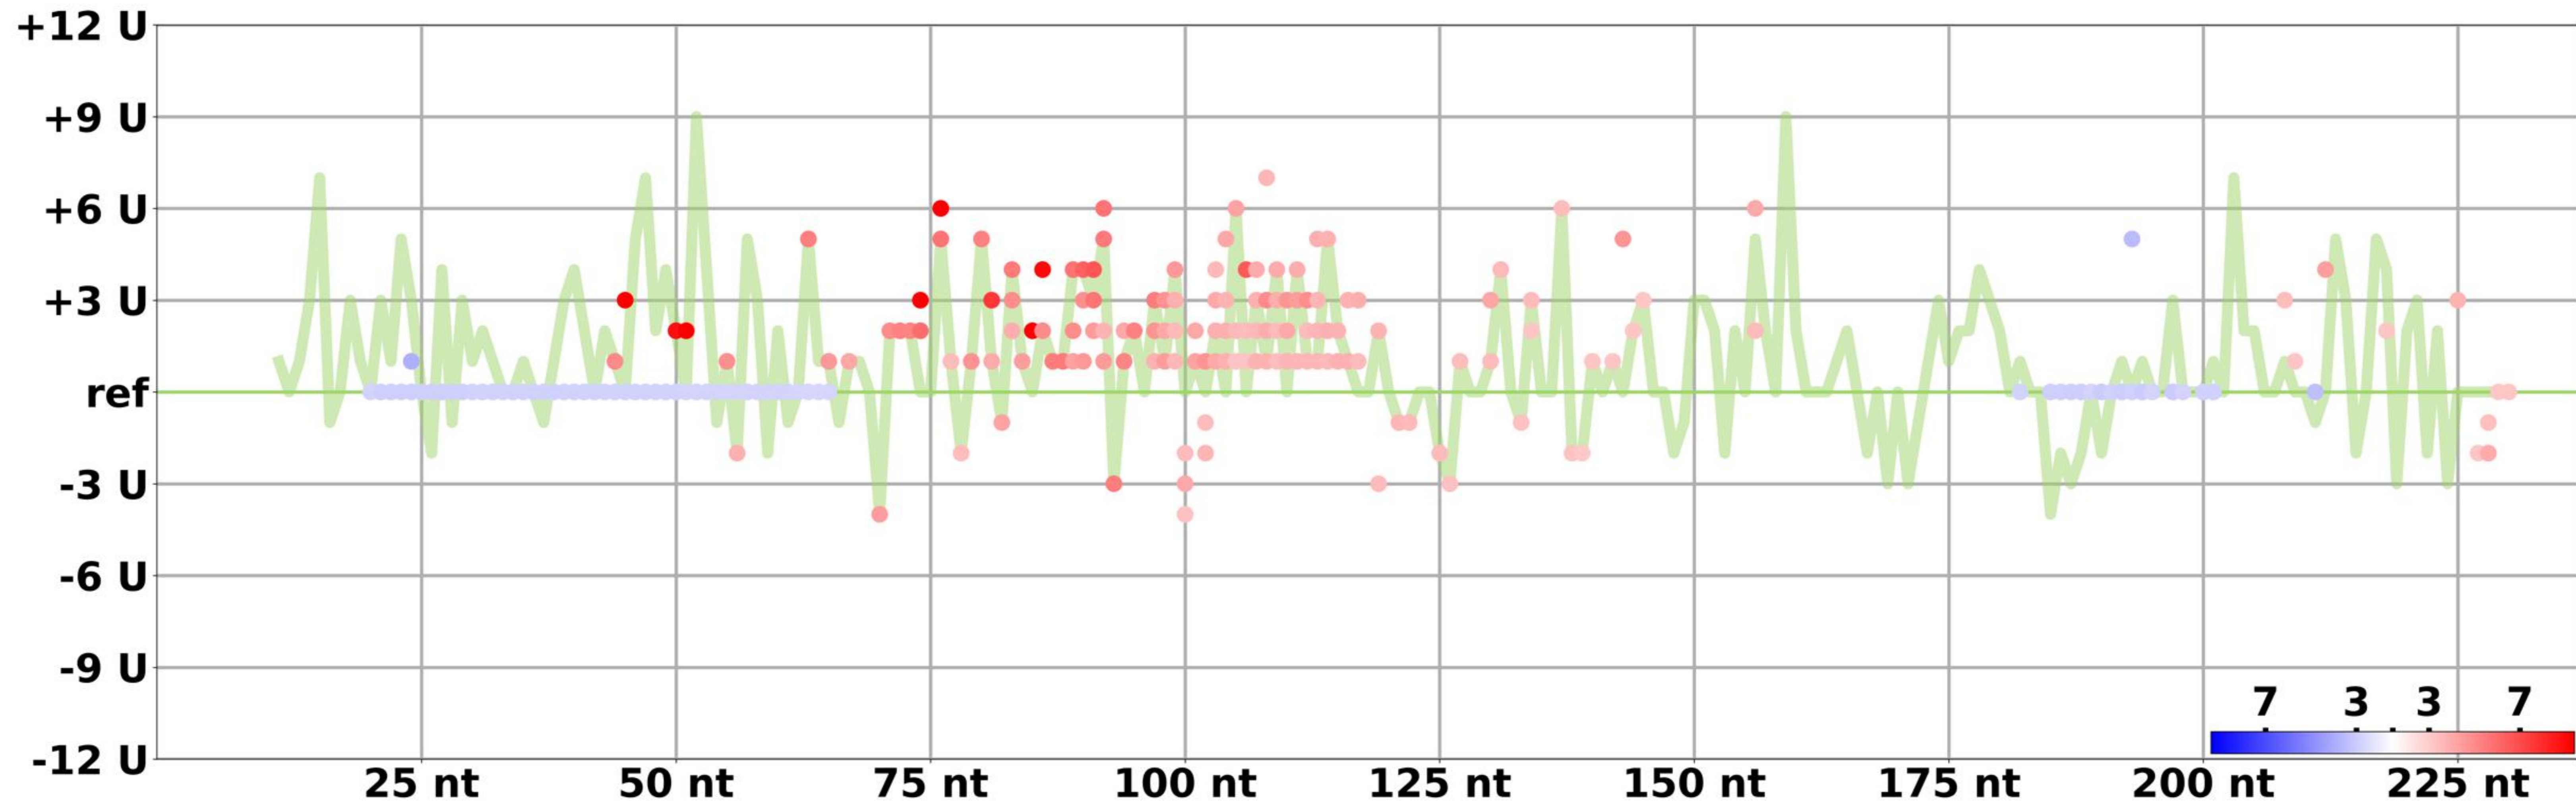

# Syl, RPS12 : abrupt vs fed

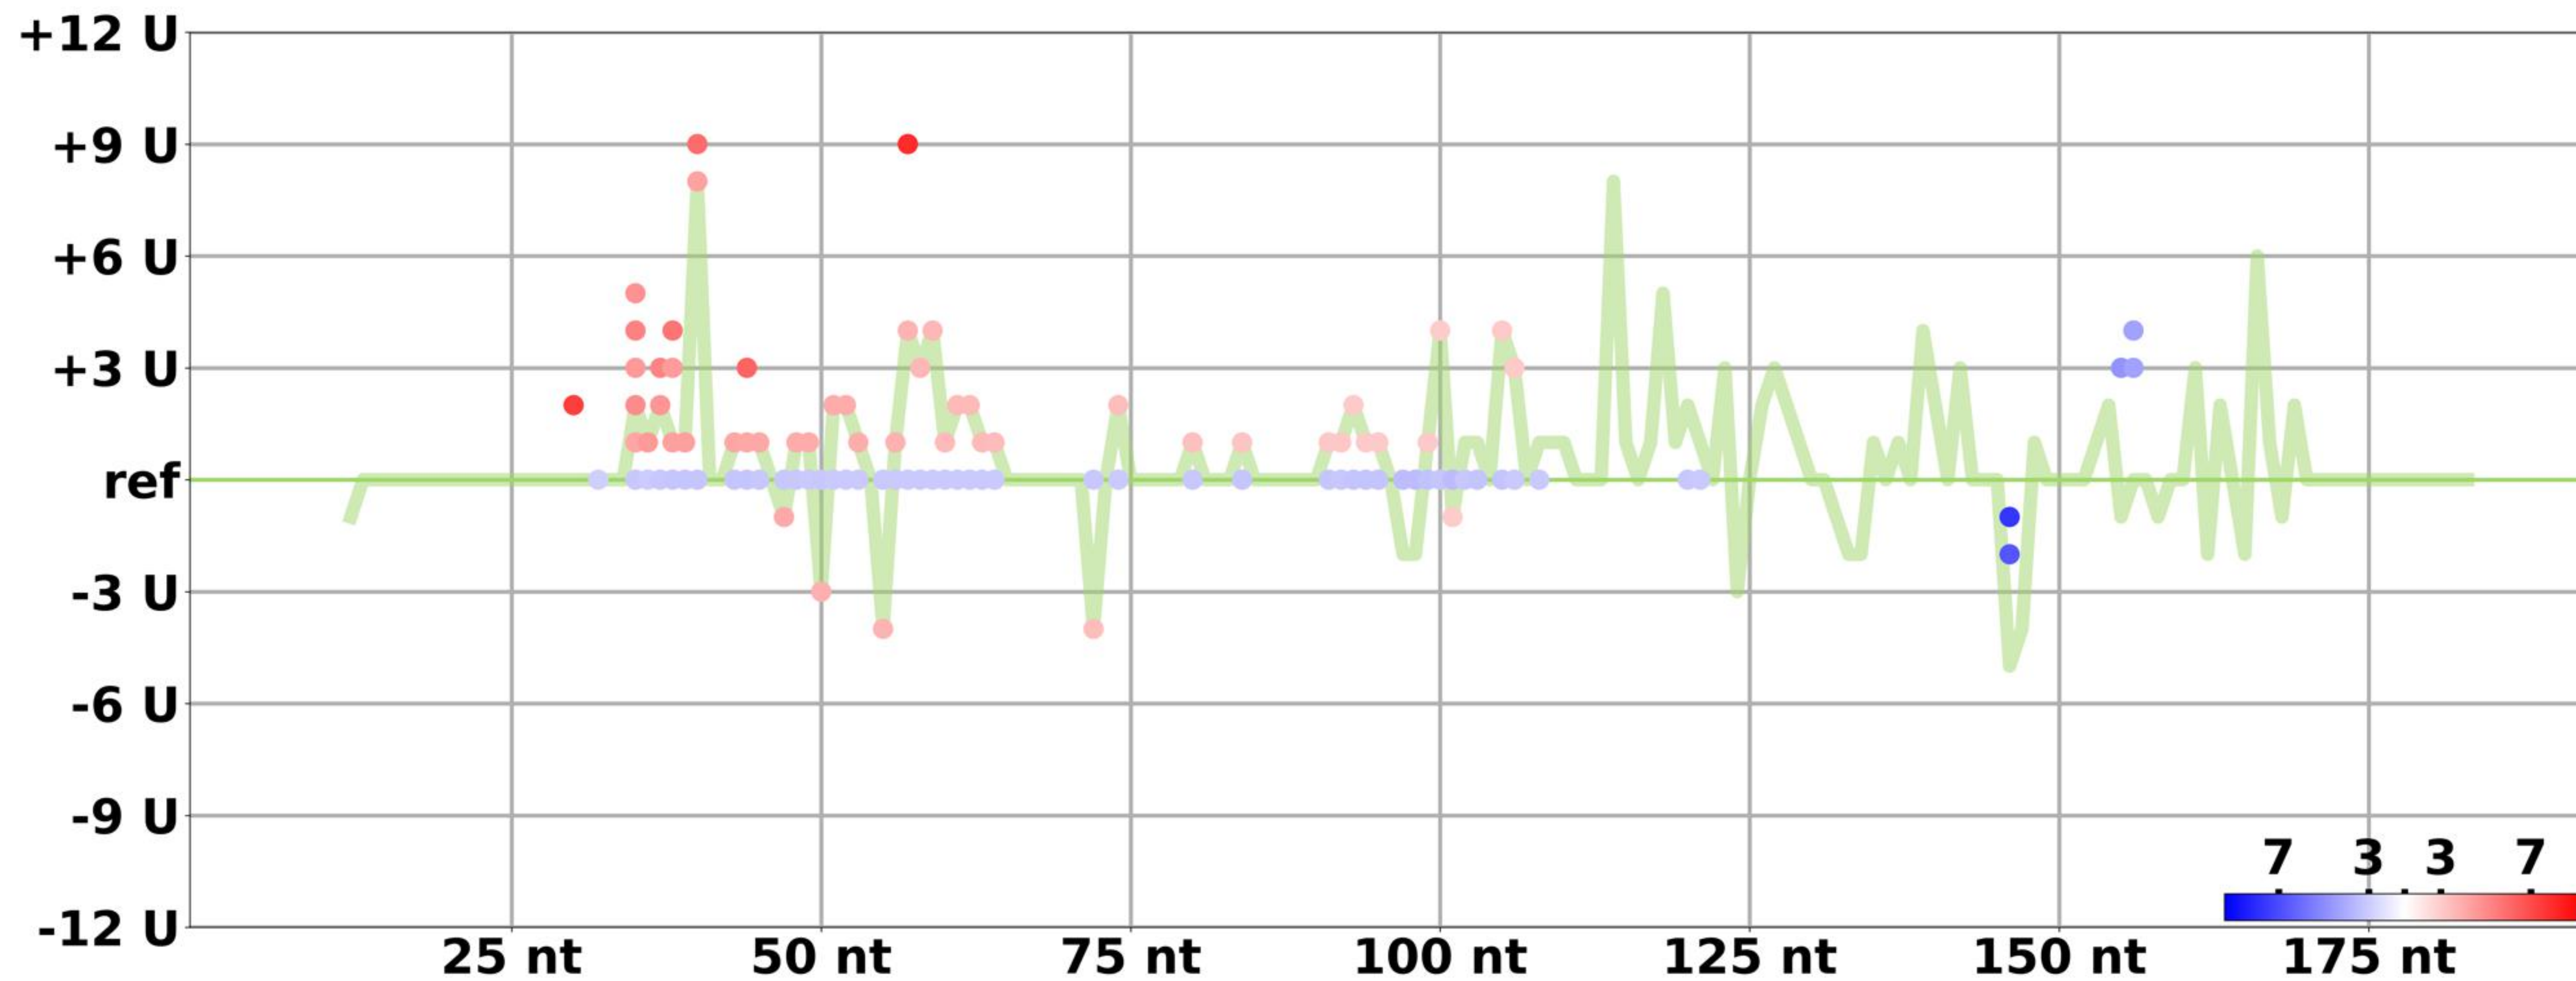

# Syl, RPS12 : slow vs fed

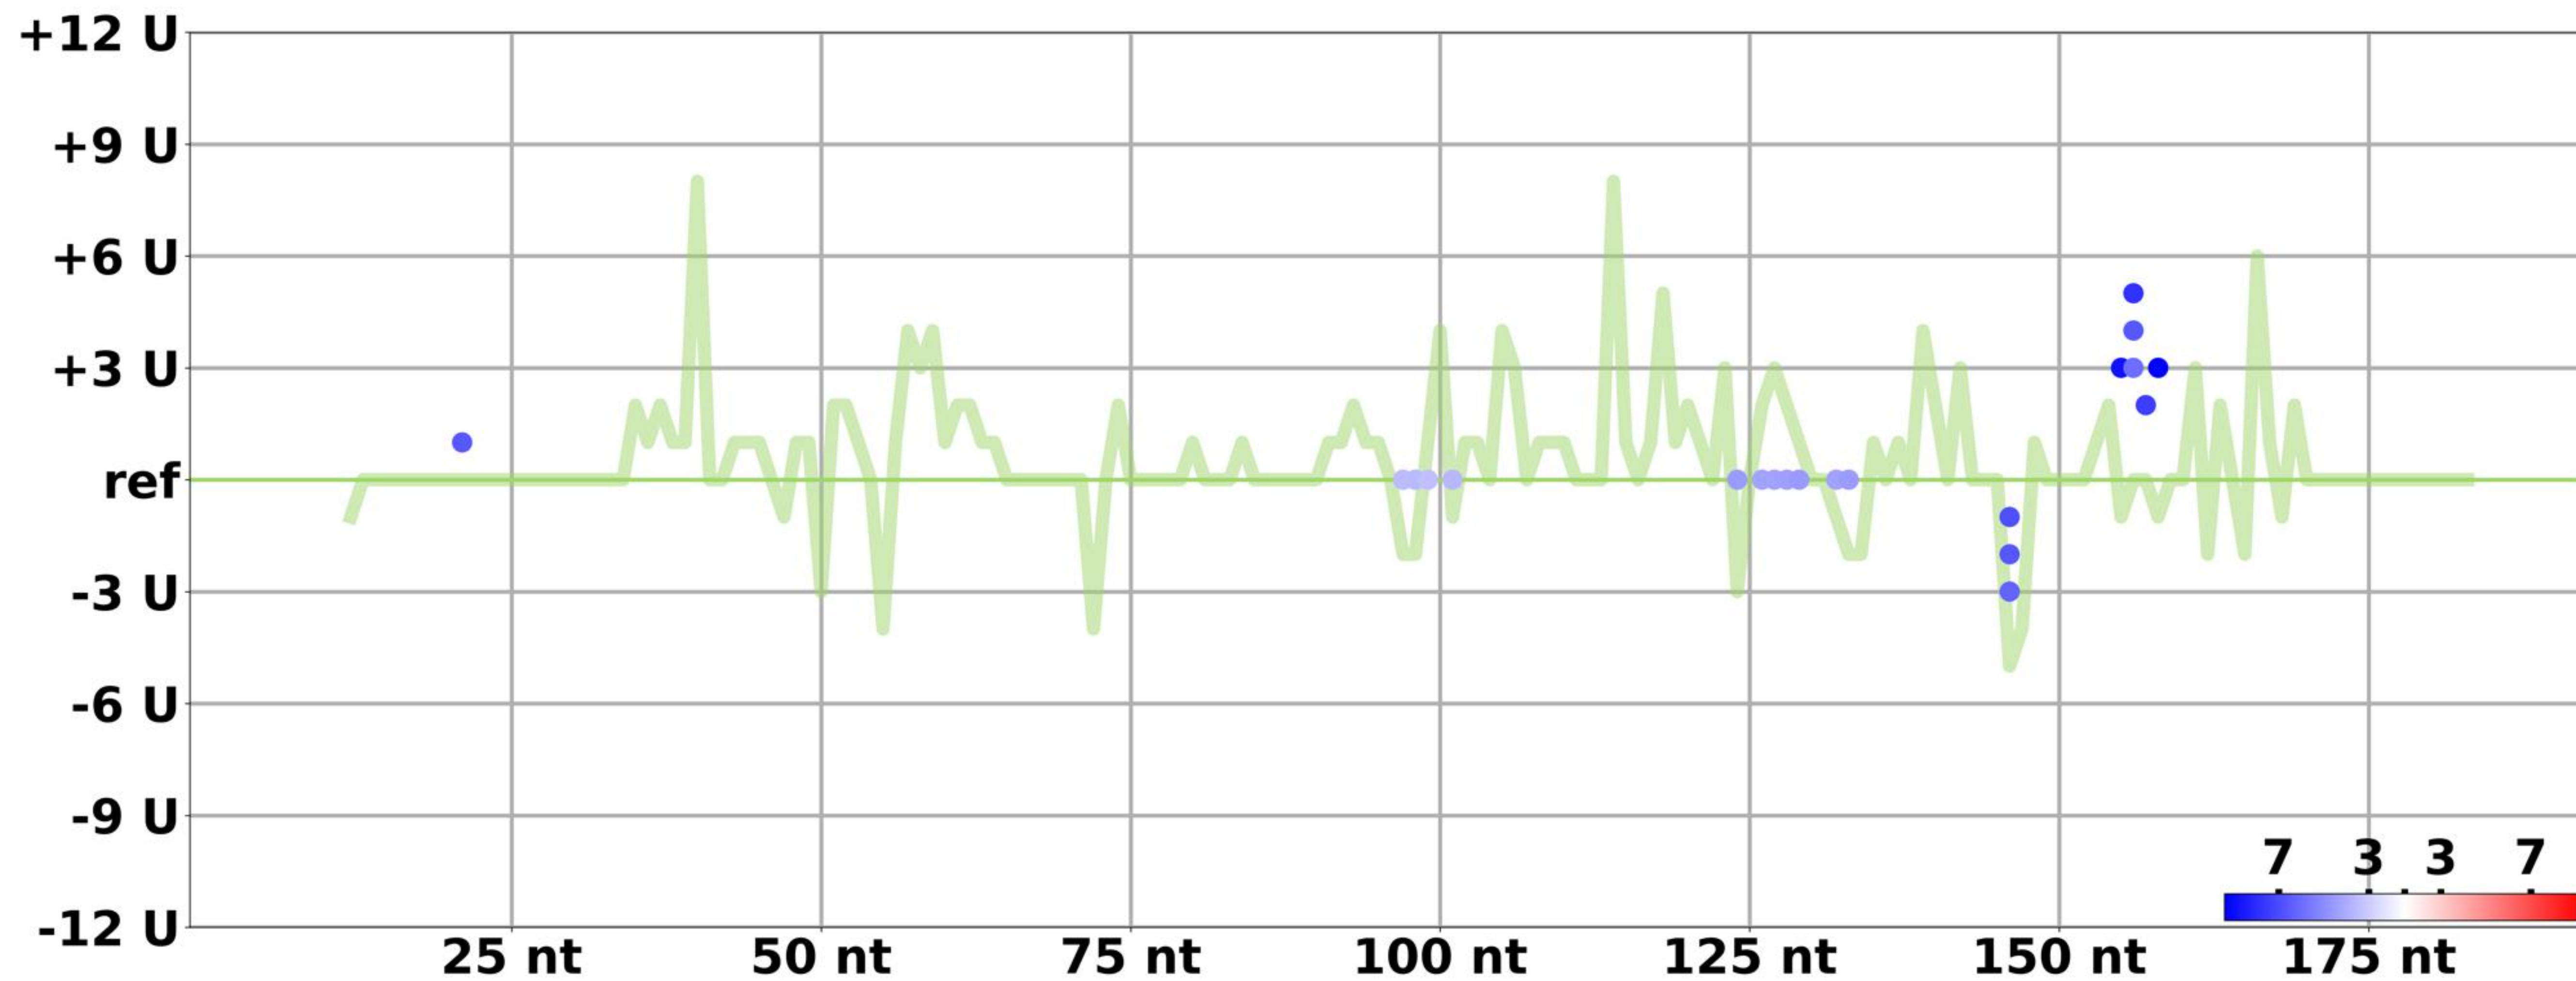

Supplement: Supplemental_Figure_S4.pdf [file Supplemental_Figure_S4.pdf]
