# Supplementary material
Source: HighWire-hosted journal article supplement (doi:10.1101/rna.079088.121)
Supplement: Supplemental_Figure_and_Table_Legends.docx [file Supplemental_Figure_and_Table_Legends.docx]

**Supplemental Figure and Table Legends**

**Figure S1. Correlation plot comparing the different libraries used in this study.** Pearson’s Correlation Coefficient for each comparison is presented. Tot, libraries prepared from total RNA; mt, libraries prepared from RNA extracted from subcellular fractionations enriched in mitochondrial vesicles; fed, libraries from epimastigotes growing in rich culture medium; slow, libraries from epimastigotes that have depleted medium nutrients over the course of 8 days for a slow starvation; abrupt, libraries from epimastigotes that were transferred from rich medium to a medium containing only buffered salts for an abrupt starvation; CLB, CL Brener; ESM, Esmeraldo; SYL, Sylvio X/10.

**Figure S2.** ***CO2* upstream minor in-frame editing event.** The first 147 nucleotides of the coding region are shown. The bottom nucleotide sequence of the alignment is the *CO2* maxicircle DNA loci (DNA). The top nucleotide sequence is a minor editing pattern appearing in RNA sequencing reads that results in a translation with a single amino acid difference yet maintains the overall reading frame (labeled “non-c” in grey). Changes due to editing are highlighted in green (U insertions presented as “Ts” and deletions as “-“). Protein translations are presented above the nucleotide alignments.

**Figure S3. Levels of read coverage, and canonical and non-canonical editing in *Trypanosoma cruzi*.** For each strain, the bottom plot depicts read coverage across the named transcript, with the portion of reads edited at each location along the transcript shown in a lighter blue. The middle plot is a bar plot with an x axis consistent with the bottom coverage plot. At each editing site the bar distinguishes the total number of reads, in which an editing event at that site is observed and breaks down the number by canonical and noncanonical editing events. A, C, and G positions along the transcript that are not locations of editing for canonical edited sequence are blocked out in grey and not analyzed. The top plot shows a similar bar graph, but the y axis represents percentage of editing that is canonical rather than the absolute numbers of reads possessing editing at each site.There are two plots for each condition and strain combination, representing the plots for sequencing output of each replicate.

**Figure S4.** **Differences in editing upon starvation of cultured *Trypanosoma cruzi* epimastigotes.** Each scheme represents the numbers of inserted/deleted Us as dots, located above (insertion) or below (deletion) the reference (ref) line, with the distance from neutral distinguishing the number of insertions or deletions. Each dot defines an editing state. The x coordinate, the axis for which is shown in green, represents an A, G, or C nucleotide position in the maxicircle sequence for the namedcryptogene from 5’ to 3’ where editing can potentially occur. Fold increase (red) or decrease (blue) of each specific editing event represented by positions on the namedtranscript matrix for parasites abruptly starved of nutrients (abrupt vs. fed) or parasites allowed to gradually deplete medium nutrients over 8 days (slow vs. fed). The jagged green line shows the “path” of the canonical edited mRNA for the cryptogene, the number of U insertions or deletions at each editing site that will result in the canonical ORF. Provided in this figure are fold increase matrices from strains Sylvio X/10 and CL Brener transcripts where sufficient changes were present to warrant its inclusion. Only CL Brener matrices from the abrupt starvation vs fed comparison are included.

**Table S1. Length of assembled *Trypanosoma cruzi* mature maxicircle-encoded mRNAs and their most supported full-length open reading frames (ORFs).** Sequences were reconstructed from reads using T-Aligner for the three strains indicated, and the accession numbers of NCBI submission provided. The Editing Pattern column indicates whether this maxicircle transcript is not edited (non-edited), edited at a small domain only (minimally edited), or edited throughout an extensive portion of the transcript (pan-edited). The percentage of the likely full-length ORF that was able to be reconstructed with the acquired reads for that strain is shown. The T-Aligner mode indicated in the last column controls the preferable read overlap graph path when the program does ORFs assembly. In ‘coverage’ mode T-Aligner prefers reads with maximal support of editing states, in ‘editing’ mode reads with more edits are preferred, in ‘extension’ mode longest read with best overlap is preferred.

**Table S2.** Transcripts per million (TMM) values for each replicate library.
