# Supplementary material
Source: HighWire-hosted journal article supplement (doi:10.1101/rna.079088.121)
Supplement: Supplemental_Figure_S2.pdf [file Supplemental_Figure_S2.pdf]

|              |                                                                                 |
|--------------|---------------------------------------------------------------------------------|
| <b>non-c</b> | <b>M S F I L S F W M I F L I D S V I V L L S F V C F V C</b>                    |
| DNA          | ATGAGTTTTATTTTGTCAATTTGAATGATATTTTAAATAGATTCTGTTATAGTGTATTATCCTTTGTTTGTGTTGTGTT |
| <b>non-c</b> | <b>V W I C V L L L S T M L F V T K I N N I Y C</b>                              |
| DNA          | GTGTGAATATGTGTGTTGCTCCTTCTAC <b>TA G</b> TTATTTGTTACAAAGATAAATAATATATATTGT ...  |
|              | <b>V W I C V L L L S T V L F V T K I N N I Y C</b>                              |
|              | GTGTGAATATGTGTGTTGCTCCTTCTAC A GTTTTATTTGTTACAAAGATAAATAATATATATTGT ...         |

**Figure S2.** CO2 upstream minor in-frame editing event. The first 147 nucleotides of the coding region are shown. The bottom nucleotide sequence of the alignment is the CO2 maxicircle DNA loci (DNA). The top nucleotide sequence is a minor editing pattern appearing in RNA sequencing reads that results in a translation with a single amino acid difference yet maintains the overall reading frame (labeled “non-c” in grey). Changes due to editing are highlighted in green (U insertions presented as “Ts” and deletions as “-”). Protein translations are presented above the nucleotide alignments.
