# Supplementary material
Source: HighWire-hosted journal article supplement (doi:10.1101/rna.079088.121)
Supplement: Supplemental_Table_S1.pdf [file Supplemental_Table_S1.pdf]

| Strain                          | Gene  | Protein, aa | GeneBank ID   | T-Aligner mode |
|---------------------------------|-------|-------------|---------------|----------------|
| Sylvio X/10                     | ND8   | 145         | OM022896      | coverage       |
| Sylvio X/10                     | ND9   | 192         | OM022897      | coverage       |
| Sylvio X/10                     | ND7   | 387         | OM022895      | editing        |
| Sylvio X/10                     | CO3   | 288         | OM022893      | coverage       |
| Sylvio X/10                     | CYb   | 370         | OM022898      | extension      |
| Sylvio X/10                     | A6    | 233         | OM022892      | extension      |
| Sylvio X/10                     | CR3   | 89*         | not submitted | editing        |
| Sylvio X/10                     | CO2   | 210         | OM022894      | coverage       |
| Sylvio X/10                     | MURF2 | 357         | OM022899      | coverage       |
| Sylvio X/10                     | CR4   | 163*        | not submitted | coverage       |
| Sylvio X/10                     | ND3   | 125*        | not submitted | extension      |
| Sylvio X/10                     | RPS12 | 95          | OM022900      | editing        |
| CL Brener                       | CO3   | 288         | OM022901      | coverage       |
| CL Brener                       | CYb   | 368         | OM022903      | coverage       |
| CL Brener                       | CO2   | 210         | OM022902      | coverage       |
| CL Brener                       | RPS12 | 95          | OM022904      | editing        |
| Esmeraldo                       | CO3   | 288         | OM022905      | coverage       |
| Esmeraldo                       | RPS12 | 87          | OM022906      | coverage       |
| * but multiple products present |       |             |               |                |

**Table S1.** Length of assembled *Trypanosoma cruzi* mature maxicircle-encoded mRNAs and their most supported full-length open reading frames (ORFs). Sequences were reconstructed from reads using T-Aligner for the three strains indicated, and the accession numbers of NCBI submission provided. The Editing Pattern column indicates whether this maxicircle transcript is not edited (non-edited), edited at a small domain only (minimally edited), or edited throughout an extensive portion of the transcript (pan-edited). The percentage of the likely full-length ORF that was able to be reconstructed with the acquired reads for that strain is shown. The T-Aligner mode indicated in the last column controls the preferable read overlap graph path when the program does ORFs assembly. In ‘coverage’ mode T-Aligner prefers reads with maximal support of editing states, in ‘editing’ mode reads with more edits are preferred, in ‘extension’ mode longest read with best overlap is preferred.
