# Supplementary material
Source: HighWire-hosted journal article supplement (doi:10.1101/rna.079088.121)
Supplement: Supplemetal_Table_S2.xlsx [file Supplemetal_Table_S2.xlsx]

## Sheet: Sheet1
	CL Brener				Esmeraldo				Sylvio X/10				CL Brener						Sylvio X/10
	mito		total		mito		total		mito		total		fed		abrupt		slow		fed		abrupt		slow
Transcript	1	2	1	2	1	2	1	2	1	2	1	2	1	2	1	2	1	2	1	2	1	2	1	2
ND8	209872	214582	227944	202145	377263	288472	342258	335244	230661	274513	272555	265060	83774.3	94951.5	69636.2	85512.7	111770	110953	145909	135406	213296	262996	373938	256839
ND9	30779.4	38150	32278.5	35612.1	38337.8	25542.9	31058.6	26808.1	43306.8	53440	44522.6	45412.9	34174.3	31551	67081.9	52791.8	43581.6	50839.1	41300.4	36306.2	71129.3	44696.2	28484.1	14584.7
RPS3	58.7342	90.7446	48.4541	231.196	1.24063	0	0	26.1033	17.4841	3.54588	6.54456	8.79925	319.715	925.02	117.261	109.269	348.753	237.84	98.5271	83.8397	90.8349	70.7288	143.413	31.4754
ND7	239893	252973	222195	232137	245438	250845	170680	201126	234897	326292	239636	244602	118509	141829	203590	220955	142019	140837	216564	175716	212811	197941	147246	76671
CO3	243860	278240	252914	296130	37002.9	109333	42032.9	51371.3	100946	209336	108744	118403	103842	94532.2	157445	156391	117046	132980	74637.8	74870.7	49804.1	59374.6	21291.8	16355
CYb	34159.3	50934.7	48300.7	56324.1	13157.5	8850.51	15482.1	9162.25	40265.8	33618.5	38900.9	40371	146876	168723	118647	135044	199596	206544	90783	80004.4	210566	326267	98027.5	124208
A6	39031.6	42222	39005.6	45290.5	39295.6	32564.8	39035.6	38058.6	25459.3	35082.1	26773.8	30419	31737.1	34278.5	14809.1	16026.3	22824.9	21398.3	32438.3	28787.8	11951.1	15774.7	9476.26	8577.38
ND2	164.634	240.055	104.984	167.418	36.5985	28.7718	47.2014	0	19.9818	17.7294	13.0891	0	4213.63	4460.91	4933.8	4113.07	4761.47	4941.2	410.823	341.703	325.608	240.92	56.7927	107.273
CR3	18462.1	19880.1	19187.8	16789.6	5626.86	6692.63	6915.01	6969.58	4613.3	12492.1	4934.6	5323.55	8555.14	8372.35	11664.1	10754.6	10399.1	10929.1	7254.05	6424.39	7824.38	6100.35	2402.95	2770.48
ND1	2204.31	2918.63	2180.44	2750.43	613.49	421.986	660.82	339.343	7651.79	4427.03	5765.76	4962.78	8114.16	10900	3501.23	3563.79	7140.79	7153.01	6581.96	5568.77	24577.1	25453.5	11860.1	14632.9
CO2	13442.1	16543.2	14810.8	14637.1	101957	71878.3	124494	84104.8	81984.1	63146	73403.8	66786.3	31846.6	34978.6	48570.2	41663.7	49649.7	53132.6	110217	102428	550180	637719	269642	275458
MURF2	9.78904	4.50505	16.1514	7.97227	17.3688	4.79529	0	0	29.9727	7.97824	19.6337	26.3978	27.9292	14.7271	15.4873	21.8537	24.8436	6.28652	92.3691	58.008	67.0781	112.724	57.5085	56.5273
CO1	7849.03	10969.2	10716.4	9160.14	970.79	428.38	873.227	756.995	82111.5	45748.1	71708.7	64894.5	12395.4	15379.9	16019.3	12247.6	19527.4	18143.9	58506.6	57854.4	362413	418568	139377	169191
CR4	33493.6	40091.1	37737.7	37533.4	23394.5	15570.3	22397.1	22187.8	10980	11521.5	11727.8	12055	13641.2	12929.4	19322.6	15934.3	15745.5	18531.6	4577.99	4683.24	4133.69	5145.52	3726.6	2776.91
ND4	1265.46	1728.01	2228.89	2224.26	5868.78	4505.98	5994.58	6343.1	12308.8	7817.78	13004	12011	8598.51	15816.9	5604.17	5546.61	7917.86	7808.9	23914.8	16635.2	10943.5	8259.79	10107.9	8051.29
ND3	24553.6	28523.4	30816.8	25870	47040.8	24531.1	32545.4	30227.6	24861.1	27290	27153.4	26793.7	23609.7	24743.3	16757.2	15620.9	20162.3	19908.4	21632.8	20495	28125.3	28837.4	23411.9	16735.9
RPS12	128974	133553	120352	128377	49040.1	85821.4	43944.5	50405.4	51498.1	108525	55648.4	56808	69336.4	64549.4	86624.6	84005.4	89424.9	92736.6	40003.7	34689.2	28381	53017.8	29764.8	30798.4
ND5	284.772	341.097	339.179	494.281	64.5126	30.3702	70.8022	104.413	1497.39	858.104	1387.45	1055.91	988.546	1643.07	788.744	632.454	1125.82	1221.68	2869.6	2024.39	3039.48	3806.09	1751.27	1387.49
	Table S2. Transcripts per million (TMM) values for each replicate library.
